# Supplementary material for: Magnetic metal phenolic networks: expanding the application of a promising nanoprobe to phosphoproteomics research
Source: Royal Society of Chemistry journal article supplement (doi:10.1039/d0cc04615a), 2020-01-01
Supplement: d0cc04615a1.xlsx [file d0cc04615a1.xlsx]

## Sheet: Fe3O4@TiTA-Replicate 1
A2	Sequence	# PSMs	# Proteins	# Protein Groups	Protein Group Accessions	Modifications	ΔCn	phosphoRS Site Probabilities	Area	q-Value	PEP	IonScore	Exp Value	Charge	MH+ [Da]	ΔM [ppm]	RT [min]	# Missed Cleavages
High	QGSItSPQANEQSVtPQR	2	1	1	Q9UQ35	T5(Phospho); T15(Phospho)	0	S(3): 33.3; T(5): 33.3; S(6): 33.3; S(13): 0.0; T(15): 100.0	1.09853e+07	0	0.0006665	17.65	0.473284	2	2087.88	1.70553	17.868	0
High	ALPQtPRPR	1	1	1	Q9UQ35	T5(Phospho)	0	T(5): 100.0	3.15278e+07	0.002	0.0261	27.7	0.0196996	2	1115.57	0.673443	8.58026	1
High	TVARtPLGQR	1	1	1	Q9UQ35	T5(Phospho)	0	T(1): 0.0; T(5): 100.0	8.82531e+06	0.006	0.07455	21.43	0.121227	2	1178.61	0.804203	7.48678	1
High	QGSItSPQANEQSVTPQR	2	1	1	Q9UQ35	T5(Phospho)	0	S(3): 33.3; T(5): 33.3; S(6): 33.3; S(13): 0.0; T(15): 0.0	4.67829e+06	0	2.295e-08	36.56	0.00674545	2	2007.92	2.33176	15.2595	0
High	THTtALAGRSPsPASGR	2	1	1	Q9UQ35	T4(Phospho); S12(Phospho)	0	T(1): 0.0; T(3): 0.0; T(4): 0.0; S(10): 100.0; S(12): 100.0; S(15): 0.0	5.58075e+07	0	3.455e-05	37.49	0.00459854	2	1826.8	2.22266	8.1652	1
High	AQtPPGPSLsGSKSPcPQEK	2	1	1	Q9UQ35	T3(Phospho); S10(Phospho); C16(Carbamidomethyl)	0	T(3): 100.0; S(8): 0.0; S(10): 2.0; S(12): 2.0; S(14): 96.0	9.84357e+07	0	0.0003057	12.45	1.64683	3	2212.94	0.840175	14.4037	1
High	AQtPPGPSLSGSK	1	1	1	Q9UQ35	T3(Phospho)	0	T(3): 100.0; S(8): 0.0; S(10): 0.0; S(12): 0.0	5.26699e+07	0	3.327e-06	37.55	0.0038938	2	1306.61	1.95974	13.3297	0
High	SRtPPSAPSQSR	2	1	1	Q9UQ35	T3(Phospho)	0	S(1): 0.0; T(3): 100.0; S(6): 0.0; S(9): 0.0; S(11): 0.0	2.59037e+07	0	0.0003102	44.94	0.000617207	2	1350.62	1.74407	6.26026	1
High	SStPPGESYFGVSSLQLK	3	1	1	Q9UQ35	T3(Phospho)	0	S(1): 0.0; S(2): 0.0; T(3): 100.0; S(8): 0.0; Y(9): 0.0; S(13): 0.0; S(14): 0.0	9.7092e+07	0	4.042e-08	71.04	2.3572e-06	2	1963.91	1.44108	28.9677	0
High	HGGSPQPLATTPLSQEPVNPPSEASPtR	2	1	1	Q9UQ35	T27(Phospho)	0	S(4): 0.0; T(10): 0.0; T(11): 0.0; S(14): 0.0; S(22): 0.8; S(25): 49.6; T(27): 49.6	4.03886e+07	0	8.548e-15	40.71	0.00306979	3	2932.39	1.90804	21.1805	0
High	MAPALSGANLtSPR	2	1	1	Q9UQ35	T11(Phospho)	0	S(6): 0.0; T(11): 50.0; S(12): 50.0	7.18603e+06	0	3.13e-06	40.78	0.00180072	2	1465.69	1.89164	20.8529	0
High	tPPVALNSSR	1	1	1	Q9UQ35	T1(Phospho)	0	T(1): 100.0; S(8): 0.0; S(9): 0.0	2.67127e+07	0	0.0001289	39.4	0.00212408	2	1121.54	0.299312	14.3547	0
High	tPTAPAVNLAGAR	1	1	1	Q9UQ35	T1(Phospho)	0	T(1): 100.0; T(3): 0.0	6.76495e+06	0	5.151e-07	48.67	0.000304262	2	1318.65	0.536137	19.6162	0
High	RGEGDAPFsEPGtTSTQRPSSPETATK	1	1	1	Q9UQ35	S9(Phospho); T13(Phospho)	0	S(9): 0.0; T(13): 33.3; T(14): 33.3; S(15): 33.3; T(16): 33.3; S(20): 33.3; S(21): 33.3; T(24): 0.0; T(26): 0.0	2.45889e+07	0	0.001434	15.17	1.18747	3	2951.25	1.81565	14.7455	2
High	KPIDSLRDsR	1	1	1	Q9UQ35	S9(Phospho)	0	S(5): 0.4; S(9): 99.6	2.05315e+07	0	0.0003749	44.11	0.000787945	2	1266.62	1.4729	6.78035	2
High	EQNSALPTsSQDEELMEVVEK	2	1	1	Q9UQ35	S9(Phospho)	0	S(4): 0.9; T(8): 0.9; S(9): 49.1; S(10): 49.1	6.98674e+06	0	0.001123	18.3	0.512511	3	2443.07	3.29793	30.254	0
High	AGMSSNQsIsSPVLDAVPR	10	1	1	Q9UQ35	S8(Phospho); S10(Phospho)	0	S(4): 3.7; S(5): 3.7; S(8): 64.2; S(10): 64.2; S(11): 64.2	5.99485e+06	0	0.0001164	27.75	0.0460832	2	2075.9	6.37352	30.8989	0
High	SSGHSsSELsPDAVEK	2	1	1	Q9UQ35	S6(Phospho); S10(Phospho)	0	S(1): 0.0; S(2): 0.0; S(5): 97.1; S(6): 1.4; S(7): 1.4; S(10): 100.0	1.13738e+07	0	1.567e-05	17.59	0.2604	2	1776.67	0.189039	13.9783	0
High	GEFSAsPmLK	1	1	1	Q9UQ35	S6(Phospho); M8(Oxidation)	0	S(4): 0.0; S(6): 100.0	2.01114e+07	0.001	0.005689	23.55	0.0675603	2	1162.49	0.0754596	16.7655	0
High	GEFSAsPMLK	1	1	1	Q9UQ35	S6(Phospho)	0	S(4): 0.0; S(6): 100.0	2.79295e+07	0	4.664e-05	47.65	0.000275724	2	1146.49	0.113105	21.1262	0
High	HSLSGsSPGMK	3	1	1	Q9UQ35	S6(Phospho)	0	S(2): 0.0; S(4): 0.4; S(6): 49.8; S(7): 49.8	5.64407e+06	0	4.707e-06	35.33	0.00364896	2	1167.49	0.770875	6.56644	0
High	ENSFGsPLEFR	1	1	1	Q9UQ35	S6(Phospho)	0	S(3): 0.0; S(6): 100.0	3.39571e+07	0	3.821e-06	58.69	2.06191e-05	2	1362.57	0.392945	25.2012	0
High	QSHSGsISPYPK	3	1	1	Q9UQ35	S6(Phospho)	0	S(2): 0.0; S(4): 0.5; S(6): 49.7; S(8): 49.7; Y(10): 0.0	3.80004e+07	0	5.181e-05	57	4.14017e-05	2	1367.6	-0.166531	8.42733	0
High	QSHSEsPSLQSK	2	1	1	Q9UQ35	S6(Phospho)	0	S(2): 0.0; S(4): 0.0; S(6): 100.0; S(8): 0.0; S(11): 0.0	5.89981e+07	0	5.407e-08	72.08	9.973e-07	2	1394.6	0.329947	5.99195	0
High	ELSNsPLR	1	1	1	Q9UQ35	S5(Phospho)	0	S(3): 0.0; S(5): 100.0	7.04198e+07	0.002	0.02972	37.71	0.0018553	2	995.456	-0.240423	12.3774	0
High	EISSsPTSK	1	1	1	Q9UQ35	S5(Phospho)	0	S(3): 0.0; S(4): 0.0; S(5): 100.0; T(7): 0.0; S(8): 0.0	2.92585e+06	0	0.0025	36.81	0.00235547	2	1015.43	0.23203	6.48661	0
High	SLSYsPVER	3	1	1	Q9UQ35	S5(Phospho)	0	S(1): 0.0; S(3): 0.0; Y(4): 0.0; S(5): 100.0	1.08311e+07	0.001	0.004069	36.71	0.00344487	2	1117.49	0.581087	15.7573	0
High	HGGsPQPLATTPLSQEPVNPPSEASPtR	1	1	1	Q9UQ35	S4(Phospho); T27(Phospho)	0	S(4): 100.0; T(10): 0.0; T(11): 0.0; S(14): 0.0; S(22): 1.1; S(25): 49.4; T(27): 49.4	1.61693e+08	0	2.293e-13	21.99	0.257075	3	3012.36	1.74864	24.4522	0
High	SGSsPGLR	1	1	1	Q9UQ35	S4(Phospho)	0	S(1): 0.0; S(3): 0.0; S(4): 100.0	7.08228e+06	0.001	0.005948	45.74	0.000292021	2	840.361	-0.181811	6.94832	0
High	SGMsPEQSR	1	1	1	Q9UQ35	S4(Phospho)	0	S(1): 0.0; S(4): 100.0; S(8): 0.0	2.47762e+07	0	0.0001529	69.17	7.082e-07	2	1058.4	-0.151148	7.07289	0
High	RVPsPTPAPK	1	1	1	Q9UQ35	S4(Phospho)	0	S(4): 100.0; T(6): 0.0	87216993	0.001	0.006627	39.17	0.0019188	2	1129.58	1.29095	7.65801	1
High	PSMsPTPLDR	1	1	1	Q9UQ35	S4(Phospho)	0	S(2): 0.0; S(4): 100.0; T(6): 0.0	1.37128e+07	0	2.155e-05	48.9	0.000153302	2	1180.51	0.121394	16.6728	0
High	ARsRtPPSAPSQSR	1	1	1	Q9UQ35	S3(Phospho); T5(Phospho)	0	S(3): 100.0; T(5): 100.0; S(8): 0.0; S(11): 0.0; S(13): 0.0	3.4016e+07	0	2.933e-05	21.05	0.182175	3	1657.72	-1.54336	6.20449	2
High	RPsPQPsPR	1	1	1	Q9UQ35	S3(Phospho); S7(Phospho)	0	S(3): 100.0; S(7): 100.0	9.85171e+06	0.009	0.1019	18.93	0.157364	2	1181.49	0.235834	6.59121	1
High	SLsYsPVER	2	1	1	Q9UQ35	S3(Phospho); S5(Phospho)	0	S(1): 0.0; S(3): 100.0; Y(4): 0.0; S(5): 100.0	1.16333e+07	0	0.0003782	40.42	0.000944133	2	1197.46	0.115807	20.6839	0
High	RPsPQPSPR	1	1	1	Q9UQ35	S3(Phospho)	0	S(3): 100.0; S(7): 0.0	2.46103e+07	0.001	0.0159	23.88	0.0615937	2	1101.52	-0.0591637	5.91909	1
High	SSsPVTELASR	1	1	1	Q9UQ35	S3(Phospho)	0	S(1): 0.0; S(2): 0.0; S(3): 100.0; T(6): 0.0; S(10): 0.0	3.24045e+07	0	3.085e-07	68.82	2.25042e-06	2	1213.55	0.801262	16.1445	0
High	DRsPPKSPEK	1	1	1	Q9UQ35	S3(Phospho)	0	S(3): 100.0; S(7): 0.0	1.14627e+06	0.001	0.007948	18.83	0.27951	3	1220.57	0.941917	5.08285	2
High	QPsSPYEDKDK	2	1	1	Q9UQ35	S3(Phospho)	0	S(3): 49.7; S(4): 49.7; Y(6): 0.6	7.07207e+06	0	0.0001072	39.75	0.0015677	2	1373.56	1.47224	5.96085	1
High	QPsSPYEDKDKDK	1	1	1	Q9UQ35	S3(Phospho)	0	S(3): 49.6; S(4): 49.6; Y(6): 0.9	3.38124e+06	0	0.00274	17.24	0.370046	3	1616.68	0.165146	5.16131	2
High	ELsNSPLRENSFGSPLEFR	1	1	1	Q9UQ35	S3(Phospho)	0	S(3): 98.3; S(5): 1.7; S(11): 0.0; S(14): 0.0	1.90287e+07	0	1.965e-05	26.28	0.082309	3	2259.05	0.662751	25.6654	1
High	GEGDAPFSEPGTTSTQRPSsPETATK	6	1	1	Q9UQ35	S20(Phospho)	0	S(8): 0.0; T(12): 0.0; T(13): 0.0; S(14): 0.0; T(15): 0.0; S(19): 49.2; S(20): 49.2; T(23): 1.4; T(25): 0.0	1.4187e+08	0	1.351e-06	11.9	2.47608	3	2715.18	2.2459	15.1816	1
High	RGEGDAPFSEPGTTSTQRPsSPETATK	6	1	1	Q9UQ35	S20(Phospho)	0	S(9): 0.0; T(13): 0.0; T(14): 0.0; S(15): 0.0; T(16): 0.0; S(20): 49.5; S(21): 49.5; T(24): 1.0; T(26): 0.0	1.56512e+08	0	2.84e-14	38.47	0.00582444	4	2871.28	1.12534	12.7421	2
High	MGQAPSQSLLPPAQDQPRsPVPSAFSDQSR	1	1	1	Q9UQ35	S19(Phospho)	0	S(6): 0.0; S(8): 0.0; S(19): 96.2; S(23): 1.9; S(26): 1.9; S(29): 0.0	1.1631e+08	0	3.346e-06	12.96	1.89178	3	3259.53	1.73393	23.8622	1
High	TPAAAAAMNLAsPR	1	1	1	Q9UQ35	S12(Phospho)	0	T(1): 0.0; S(12): 100.0	8.04154e+06	0	4.977e-12	117.08	4.45637e-11	2	1421.66	0.46583	19.5492	0
High	MALPPQEDATAsPPR	4	1	1	Q9UQ35	S12(Phospho)	0	T(10): 0.0; S(12): 100.0	1.27263e+08	0	1.547e-08	58.01	3.76337e-05	2	1660.74	1.26016	19.6749	0
High	ELSNSPLRENsFGsPLEFR	1	1	1	Q9UQ35	S11(Phospho); S14(Phospho)	0	S(3): 40.4; S(5): 40.4; S(11): 59.6; S(14): 59.6	6.98007e+06	0.005	0.06387	12.9	1.78989	2	2339.02	2.59334	28.7227	1
High	AGMSSNQSISsPVLDAVPR	4	1	1	Q9UQ35	S11(Phospho)	0	S(4): 0.0; S(5): 0.0; S(8): 0.0; S(10): 0.0; S(11): 100.0	3.03451e+07	0	2.47e-15	74.27	1.12607e-06	2	1995.92	0.0348689	25.5286	0
High	AQTPPGPSLsGSKSPcPQEK	4	1	1	Q9UQ35	S10(Phospho); C16(Carbamidomethyl)	0	T(3): 0.0; S(8): 25.0; S(10): 25.0; S(12): 25.0; S(14): 25.0	6.54221e+06	0.002	0.02003	12.29	1.7706	2	2132.97	1.94724	12.034	1
High	SSGHSSSELsPDAVEK	3	1	1	Q9UQ35	S10(Phospho)	0	S(1): 0.0; S(2): 0.0; S(5): 1.5; S(6): 1.5; S(7): 1.5; S(10): 95.4	3.27483e+07	0	2.816e-06	44.78	0.000715218	3	1696.71	0.491011	10.9032	0
High	sRtPPSAPSQSR	1	1	1	Q9UQ35	S1(Phospho); T3(Phospho)	0	S(1): 100.0; T(3): 100.0; S(6): 0.0; S(9): 0.0; S(11): 0.0	3.91598e+06	0.001	0.01012	18.32	0.211277	3	1430.58	-0.490374	8.23765	1
High	sSRSsPELTR	4	1	1	Q9UQ35	S1(Phospho); S5(Phospho)	0	S(1): 50.0; S(2): 50.0; S(4): 1.0; S(5): 99.0; T(9): 0.0	3.61086e+07	0.001	0.01608	31.78	0.00763305	2	1279.51	1.33477	8.5312	1
High	sLsGSSPcPK	1	1	1	Q9UQ35	S1(Phospho); S3(Phospho); C8(Carbamidomethyl)	0	S(1): 100.0; S(3): 100.0; S(5): 0.0; S(6): 0.0	4.70454e+06	0	0.0002135	36.44	0.00204288	2	1179.42	0.416972	13.6111	0
High	sVsPcSNVESR	2	1	1	Q9UQ35	S1(Phospho); S3(Phospho); C5(Carbamidomethyl)	0	S(1): 100.0; S(3): 100.0; S(6): 0.0; S(10): 0.0	3.73068e+07	0	1.227e-05	45.58	0.000200603	2	1381.49	0.871984	14.2206	0
High	sSsPVTELASR	6	1	1	Q9UQ35	S1(Phospho); S3(Phospho)	0	S(1): 50.3; S(2): 50.3; S(3): 99.4; T(6): 0.0; S(10): 0.0	3.20219e+07	0	3.164e-06	45.79	0.000297905	2	1293.51	-0.0205639	22.7274	0
High	sPGmLEPLGSSR	1	1	1	Q9UQ35	S1(Phospho); M4(Oxidation)	0	S(1): 100.0; S(10): 0.0; S(11): 0.0	3.94606e+06	0	0.003232	20.97	0.129173	2	1326.58	0.520479	18.0954	0
High	scFEsSPDPELK	2	1	1	Q9UQ35	S1(Phospho); C2(Carbamidomethyl); S5(Phospho)	0	S(1): 100.0; S(5): 50.0; S(6): 50.0	7.98501e+06	0.001	0.007085	17.29	0.153976	2	1555.54	0.0055911	22.5662	0
High	sSPELTR	2	1	1	Q9UQ35	S1(Phospho)	0	S(1): 50.0; S(2): 50.0; T(6): 0.0	4.77016e+06	0.003	0.03645	25.44	0.0300047	2	869.377	0.326996	8.454	0
High	sPGMLEPLGSSR	1	1	1	Q9UQ35	S1(Phospho)	0	S(1): 100.0; S(10): 0.0; S(11): 0.0	1.16354e+07	0	2.084e-06	55.29	5.38358e-05	2	1310.58	0.93141	22.3242	0
High	sPVPSAFSDQSR	1	1	1	Q9UQ35	S1(Phospho)	0	S(1): 100.0; S(5): 0.0; S(8): 0.0; S(11): 0.0	5.47322e+07	0.001	0.01341	27.91	0.0245948	2	1357.57	-4.15506	17.1802	0
High	sGSSQELDVKPSASPQER	3	1	1	Q9UQ35	S1(Phospho)	0	S(1): 33.3; S(3): 33.3; S(4): 33.3; S(12): 0.0; S(14): 0.0	7.98264e+06	0	3.15e-07	52.49	0.000172191	2	1981.89	1.69219	12.5904	1
High	TPAAAAAmNLAsPR	1	1	1	Q9UQ35	M8(Oxidation); S12(Phospho)	0	T(1): 0.0; S(12): 100.0	4.80011e+06	0	1.736e-07	62.11	1.39953e-05	2	1437.66	0.346556	14.8496	0
High	PSmsPTPLDR	1	1	1	Q9UQ35	M3(Oxidation); S4(Phospho)	0	S(2): 0.0; S(4): 100.0; T(6): 0.0	8.90574e+06	0.002	0.02433	23.94	0.0573176	2	1196.5	0.0847081	12.2944	0
High	AGmSSNQSISsPVLDAVPR	7	1	1	Q9UQ35	M3(Oxidation); S11(Phospho)	0	S(4): 0.0; S(5): 0.0; S(8): 0.0; S(10): 0.9; S(11): 99.1	2.23922e+07	0	7.228e-12	79.35	3.51338e-07	2	2011.92	1.16654	24.06	0
High	mGQAPSQSLLPPAQDQPRsPVPSAFSDQSR	1	1	1	Q9UQ35	M1(Oxidation); S19(Phospho)	0	S(6): 0.0; S(8): 0.0; S(19): 99.9; S(23): 0.1; S(26): 0.0; S(29): 0.0	8.50265e+07	0	1.507e-07	15.94	0.997084	3	3275.53	4.65677	23.086	1
High	mALPPQEDATAsPPR	4	1	1	Q9UQ35	M1(Oxidation); S12(Phospho)	0	T(10): 0.0; S(12): 100.0	6.72411e+07	0	3.225e-05	42	0.00150168	3	1676.73	-0.131745	16.1324	0
High	ScFESsPDPELK	1	1	1	Q9UQ35	C2(Carbamidomethyl); S6(Phospho)	0	S(1): 0.0; S(5): 0.0; S(6): 100.0	9.88143e+07	0	9.961e-05	40.9	0.00118267	2	1475.58	-0.144376	17.5408	0
High	cRsPGmLEPLGSSR	2	1	1	Q9UQ35	C1(Carbamidomethyl); S3(Phospho); M6(Oxidation)	0	S(3): 100.0; S(12): 0.0; S(13): 0.0	8886320	0	0.0001075	10.84	1.82547	3	1642.71	0.338368	13.2571	1
High	cRsPGMLEPLGSSR	2	1	1	Q9UQ35	C1(Carbamidomethyl); S3(Phospho)	0	S(3): 100.0; S(12): 0.0; S(13): 0.0	1.53956e+07	0	4.111e-08	31.08	0.0186769	3	1626.71	0.179883	16.388	1
High	IEDVGsDEEDDSGK	1	2	1	P08238	S6(Phospho)	0	S(6): 100.0; S(12): 0.0	2.45976e+07	0	2.898e-10	98.33	1.70395e-09	2	1574.58	0.951934	11.6585	0
High	IEDVGsDEEDDSGKDK	2	2	1	P08238	S6(Phospho)	0	S(6): 100.0; S(12): 0.0	7.81246e+07	0	6.808e-12	124.39	5.24038e-12	2	1817.7	1.24309	8.63922	1
High	IEDVGsDEEDDSGKDKK	2	2	1	P08238	S6(Phospho)	0	S(6): 100.0; S(12): 0.0	3.35776e+08	0	5.827e-11	110.76	1.95594e-10	2	1945.8	2.16538	6.71842	2
High	SLGsVQAPSYGAR	2	1	1	P05783	S4(Phospho)	0	S(1): 0.0; S(4): 100.0; S(9): 0.0; Y(10): 0.0	1.67999e+07	0	8.175e-07	63.88	9.61763e-06	2	1372.63	1.10923	17.9298	0
High	PVSSAASVYAGAGGsGSR	3	1	1	P05783	S15(Phospho)	0	S(3): 0.0; S(4): 0.0; S(7): 0.0; Y(9): 0.0; S(15): 99.2; S(17): 0.8	8.83427e+06	0	1.576e-09	73.87	9.16806e-07	2	1660.74	1.45882	14.8237	0
High	sTFSTNYR	2	1	1	P05783	S1(Phospho)	0	S(1): 99.2; T(2): 0.8; S(4): 0.0; T(5): 0.0; Y(7): 0.0	1.18419e+07	0.001	0.004297	42.7	0.000464533	2	1055.42	0.440681	13.1449	0
High	VDIDtPDINIEGSEGK	1	1	1	Q09666	T5(Phospho)	0	T(5): 100.0; S(13): 0.0	3.98789e+06	0.001	0.006019	10.06	2.64323	2	1781.78	-0.10616	24.2825	0
High	VDIDtPDIDIHGPEGK	1	1	1	Q09666	T5(Phospho)	0	T(5): 100.0	2.81906e+06	0	3.085e-05	23.96	0.127769	3	1800.81	0.1176	21.1554	0
High	RVtAYTVDVTGR	1	1	1	Q09666	T3(Phospho)	0	T(3): 100.0; Y(5): 0.0; T(6): 0.0; T(10): 0.0	2.46584e+06	0.002	0.02232	14.19	0.874546	2	1417.69	2.02913	14.8582	1
High	FGTFGGLGsK	1	1	1	Q09666	S9(Phospho)	0	T(3): 0.0; S(9): 100.0	7.10438e+06	0.001	0.008649	33.72	0.0057536	2	1050.47	0.795802	21.7365	0
High	LPSGSGAAsPTGSAVDIR	2	1	1	Q09666	S9(Phospho)	0	S(3): 0.0; S(5): 0.0; S(9): 100.0; T(11): 0.0; S(13): 0.0	5.27248e+07	0	9.492e-16	100.46	2.49161e-09	2	1722.81	1.3715	18.7959	0
High	GHYEVTGsDDETGK	1	1	1	Q09666	S8(Phospho)	0	Y(3): 0.0; T(6): 0.0; S(8): 99.2; T(12): 0.8	2.44894e+06	0	0.00137	36.23	0.00320422	3	1574.6	1.00072	8.06128	0
High	GHYEVTGsDDETGKLQGSGVSLASK	1	1	1	Q09666	S8(Phospho)	0	Y(3): 0.0; T(6): 0.1; S(8): 97.6; T(12): 2.3; S(18): 0.0; S(21): 0.0; S(24): 0.0	3.11215e+07	0	2.776e-06	23.19	0.183258	3	2602.17	1.10741	15.948	1
High	AEAPLPsPK	1	1	1	Q09666	S7(Phospho)	0	S(7): 100.0	3.75204e+06	0.001	0.00818	16.46	0.328748	2	989.471	0.423922	14.4466	0
High	DIDISsPEFK	1	1	1	Q09666	S6(Phospho)	0	S(5): 0.0; S(6): 100.0	2.25148e+07	0	0.001339	36.64	0.00341413	2	1230.53	0.452093	24.5056	0
High	GGVTGsPEASISGSK	1	1	1	Q09666	S6(Phospho)	0	T(4): 0.0; S(6): 100.0; S(10): 0.0; S(12): 0.0; S(14): 0.0	2.6784e+07	0	1.919e-09	82.6	1.12656e-07	2	1413.63	1.27953	13.7034	0
High	LPSGsGAAsPTGSAVDIR	1	1	1	Q09666	S5(Phospho); S9(Phospho)	0	S(3): 1.3; S(5): 98.7; S(9): 100.0; T(11): 0.0; S(13): 0.0	1.27863e+07	0	8.239e-07	56.01	6.2778e-05	2	1802.78	1.70451	24.2801	0
High	KGDRsPEPGQTWTR	1	1	1	Q09666	S5(Phospho)	0	S(5): 100.0; T(11): 0.0; T(13): 0.0	2.86605e+07	0	1.732e-07	46.38	0.000632896	3	1694.77	0.960745	7.86621	2
High	ASLGsLEGEAEAEASSPK	5	1	1	Q09666	S5(Phospho)	0	S(2): 0.0; S(5): 100.0; S(15): 0.0; S(16): 0.0	4.5451e+07	0	6.896e-10	87.94	4.71637e-08	2	1812.79	1.33148	24.3679	0
High	SNsFSDER	1	1	1	Q09666	S3(Phospho)	0	S(1): 0.0; S(3): 100.0; S(5): 0.0	8.72065e+06	0.001	0.007961	46.62	9.69081e-05	2	1021.36	0.367315	7.84506	0
High	LKsEDGVEGDLGETQSR	2	1	1	Q09666	S3(Phospho)	0	S(3): 100.0; T(14): 0.0; S(16): 0.0	9.55284e+06	0	3.64e-13	102.2	1.76249e-09	2	1899.84	3.36603	13.3955	1
High	AsLGSLEGEAEAEASsPK	4	1	1	Q09666	S2(Phospho); S16(Phospho)	0	S(2): 50.0; S(5): 50.0; S(15): 1.8; S(16): 98.2	1.03945e+07	0	1.766e-07	40.6	0.00182902	2	1892.76	0.231496	27.8288	0
High	IsmSEVDLNVAAPK	1	1	1	Q09666	S2(Phospho); M3(Oxidation)	0	S(2): 98.8; S(4): 1.2	3.5886e+06	0	2.143e-07	43.65	0.00105722	2	1569.72	0.45561	22.5049	0
High	IsMSEVDLNVAAPK	1	1	1	Q09666	S2(Phospho)	0	S(2): 100.0; S(4): 0.0	6.08546e+06	0	7.693e-09	63.75	1.01207e-05	2	1553.73	0.251604	26.8913	0
High	IsAPNVDFNLEGPK	1	1	1	Q09666	S2(Phospho)	0	S(2): 100.0	20263016	0	2.667e-07	51.21	0.000186938	2	1580.74	0.586792	27.3132	0
High	VSMPDVELNLKsPK	1	1	1	Q09666	S12(Phospho)	0	S(2): 0.0; S(12): 100.0	7.39883e+06	0	0.0004816	31.59	0.019728	2	1636.81	2.76614	22.4998	1
High	DELHIVEAEAMNYEGsPIK	4	1	1	P06748	S16(Phospho)	0	Y(13): 0.0; S(16): 100.0	1.31578e+08	0	2.452e-14	61.17	2.40608e-05	2	2224.98	-1.24763	27.5056	0
High	mEDSMDmDmsPLRPQNYLFGcELK	1	1	1	P06748	N-Term(Acetyl); M1(Oxidation); M7(Oxidation); M9(Oxidation); S10(Phospho); C21(Carbamidomethyl)	0	S(4): 50.0; S(10): 50.0; Y(17): 0.0	10712845	0	0.0003168	17.76	0.475684	3	3077.22	2.49338	33.6817	1
High	DELHIVEAEAmNYEGsPIK	4	1	1	P06748	M11(Oxidation); S16(Phospho)	0	Y(13): 0.0; S(16): 100.0	1.56889e+08	0	1.615e-08	26.06	0.0891872	2	2240.98	1.46615	25.5076	0
High	cGSGPVHISGQHLVAVEEDAEsEDEEEEDVK	9	1	1	P06748	C1(Carbamidomethyl); S22(Phospho)	0	S(3): 0.0; S(9): 0.0; S(22): 100.0	3.45761e+09	0	1.91e-17	76.65	8.76982e-07	3	3460.45	2.27288	19.3407	0
High	SGAQASStPLsPTR	1	1	1	P02545	T8(Phospho); S11(Phospho)	0	S(1): 0.0; S(6): 0.0; S(7): 0.0; T(8): 100.0; S(11): 98.8; T(13): 1.2	1.13394e+07	0	0.0001625	20.41	0.135122	2	1519.62	0.924986	14.7025	0
High	LRLsPsPTSQR	1	1	1	P02545	S4(Phospho); S6(Phospho)	0	S(4): 100.0; S(6): 100.0; T(8): 0.0; S(9): 0.0	9.78874e+06	0.002	0.02818	18.38	0.286066	3	1401.63	0.315176	15.0259	1
High	LRLsPSPTSQR	3	1	1	P02545	S4(Phospho)	0	S(4): 100.0; S(6): 0.0; T(8): 0.0; S(9): 0.0	1.88e+08	0.001	0.01127	35.45	0.005588	2	1321.66	0.430644	12.2112	1
High	ASsHsSQTQGGGSVTK	1	1	1	P02545	S3(Phospho); S5(Phospho)	0	S(2): 2.2; S(3): 97.7; S(5): 33.1; S(6): 33.1; T(8): 33.1; S(13): 0.7; T(15): 0.0	7.38031e+07	0.001	0.007633	14.77	0.535149	2	1678.65	2.55528	5.80188	0
High	ASsHSSQTQGGGSVTK	7	1	1	P02545	S3(Phospho)	0.0353	S(2): 1.0; S(3): 99.0; S(5): 0.0; S(6): 0.0; T(8): 0.0; S(13): 0.0; T(15): 0.0	9.28334e+07	0	8.188e-10	82.31	1.27779e-07	2	1598.68	2.08625	0.531772	0
High	SGAQASSTPLsPTR	1	1	1	P02545	S11(Phospho)	0	S(1): 0.0; S(6): 0.0; S(7): 0.0; T(8): 0.0; S(11): 100.0; T(13): 0.0	1.19742e+08	0	7.084e-06	54.63	7.52405e-05	2	1439.65	1.2463	12.4676	0
High	sVGGSGGGSFGDNLVTR	1	1	1	P02545	S1(Phospho)	0	S(1): 99.0; S(5): 1.0; S(9): 0.0; T(16): 0.0	1.34429e+07	0	5.127e-11	76.56	4.87969e-07	2	1646.72	-1.18831	20.9712	0
High	KGAGDGsDEEVDGK	1	1	1	P35579	S7(Phospho)	0	S(7): 100.0	9.97002e+06	0	1.903e-10	93.91	5.32441e-09	2	1443.57	1.46105	5.3493	1
High	KGAGDGsDEEVDGKADGAEAK	1	1	1	P35579	S7(Phospho)	0	S(7): 100.0	3.03909e+06	0	2.226e-05	21.33	0.187365	3	2085.86	1.12812	6.43278	2
High	DGQVINETsQHHDDLE	2	1	1	P08670	S9(Phospho)	0	T(8): 50.0; S(9): 50.0	1.50758e+07	0.001	0.006654	13.59	0.879419	2	1916.77	1.10584	13.8451	0
High	SLYASsPGGVYATR	1	1	1	P08670	S6(Phospho)	0	S(1): 0.0; Y(3): 0.0; S(5): 0.0; S(6): 100.0; Y(11): 0.0; T(13): 0.0	2.17729e+08	0	5.821e-08	87.98	3.38344e-08	2	1508.68	0.974845	19.1807	0
High	ETNLDsLPLVDTHSK	1	1	1	P08670	S6(Phospho)	0	T(2): 50.0; S(6): 50.0; T(12): 0.0; S(14): 0.0	9.15671e+06	0	2.648e-09	60.09	2.69849e-05	2	1748.81	0.0972681	23.0235	0
High	sYVTTSTR	1	1	1	P08670	S1(Phospho)	0	S(1): 50.0; Y(2): 50.0; T(4): 0.0; T(5): 0.0; S(6): 0.0; T(7): 0.0	2.59402e+06	0.008	0.08744	20.17	0.122125	2	994.424	-0.0738827	9.23116	0
High	NYQQNYQNsESGEK	1	1	1	P67809	S9(Phospho)	0	Y(2): 0.0; Y(6): 0.0; S(9): 100.0; S(11): 0.0	7.43982e+06	0	2.768e-05	58.31	2.25783e-05	2	1768.69	2.84983	8.16177	0
High	AADPPAENsSAPEAEQGGAE	2	1	1	P67809	S9(Phospho)	0	S(9): 50.0; S(10): 50.0	1.0336e+07	0	0.0002988	16.96	0.358443	2	1977.77	1.84222	15.5112	0
High	NEGSEsAPEGQAQQR	1	1	1	P67809	S6(Phospho)	0	S(4): 0.8; S(6): 99.2	3.40127e+06	0	8.471e-10	83.57	7.67e-08	2	1667.67	1.78481	7.34577	0
High	NYQQNYQNSEsGEKNEGSESAPEGQAQQR	8	1	1	P67809	S11(Phospho)	0	Y(2): 0.0; Y(6): 0.0; S(9): 50.0; S(11): 50.0; S(18): 0.0; S(20): 0.0	1.27464e+08	0	5.439e-12	51.15	0.000270495	3	3337.37	2.08539	9.74274	1
High	ySPSQNsPIHHIPSR	3	1	1	Q9NYF8	Y1(Phospho); S7(Phospho)	0	Y(1): 50.0; S(2): 50.0; S(4): 0.0; S(7): 100.0; S(14): 0.0	1.53009e+08	0	4.556e-06	57.68	4.23108e-05	2	1879.79	1.70045	13.457	0
High	SSSSSASPsSPSSR	2	1	1	Q9NYF8	S9(Phospho)	0	S(1): 0.0; S(2): 0.0; S(3): 0.0; S(4): 0.0; S(5): 0.0; S(7): 0.0; S(9): 49.8; S(10): 49.8; S(12): 0.0; S(13): 0.4	7.91183e+06	0	0.001478	31.43	0.0103601	2	1390.56	5.3643	5.56062	0
High	LKDLFDYsPPLHK	3	1	1	Q9NYF8	S8(Phospho)	0	Y(7): 0.7; S(8): 99.3	1.3123e+08	0	0.0007486	32.22	0.0160744	3	1652.81	0.00151069	21.5304	1
High	STFREEsPLR	1	1	1	Q9NYF8	S7(Phospho)	0	S(1): 0.0; T(2): 0.0; S(7): 100.0	1.23178e+07	0.001	0.01494	25.86	0.0513648	3	1301.59	0.0813885	11.0763	1
High	YSPSQNsPIHHIPSR	5	1	1	Q9NYF8	S7(Phospho)	0	Y(1): 0.0; S(2): 0.0; S(4): 0.0; S(7): 100.0; S(14): 0.0	1.84772e+07	0	2.566e-05	16.03	0.672293	3	1799.82	0.627979	10.9638	0
High	DLFDYsPPLHK	2	1	1	Q9NYF8	S6(Phospho)	0	Y(5): 0.0; S(6): 100.0	6.20463e+07	0	0.0004987	32.75	0.010193	2	1411.63	-1.18243	25.2487	0
High	QKFNDsEGDDTEETEDYR	1	1	1	Q9NYF8	S6(Phospho)	0	S(6): 100.0; T(11): 0.0; T(14): 0.0; Y(17): 0.0	7.40856e+06	0	4.272e-07	59.09	2.05312e-05	2	2257.85	2.07726	12.0391	1
High	IDIsPSTLR	1	1	1	Q9NYF8	S4(Phospho)	0	S(4): 100.0; S(6): 0.0; T(7): 0.0	2.20879e+08	0.001	0.007331	40.87	0.00184155	2	1081.53	0.353364	22.0831	0
High	ETQsPEQVK	1	1	1	Q9NYF8	S4(Phospho)	0	T(2): 0.0; S(4): 100.0	7.73324e+06	0.001	0.008972	36.77	0.00311359	2	1125.48	0.0596844	6.67271	0
High	FNDsEGDDTEETEDYR	1	1	1	Q9NYF8	S4(Phospho)	0	S(4): 100.0; T(9): 0.0; T(12): 0.0; Y(15): 0.0	4.23397e+07	0	1.61e-09	84.53	2.99515e-08	2	2001.69	1.90898	15.1483	0
High	QKsPEIHR	1	1	1	Q9NYF8	S3(Phospho)	0	S(3): 100.0	0	0	1.928e-05	55.98	3.26791e-05	3	1074.51	-0.286207	0.0120456	1
High	SSATSGDIWPGLSAYDNsPR	1	1	1	Q9NYF8	S18(Phospho)	0	S(1): 0.0; S(2): 0.0; T(4): 0.0; S(5): 0.0; S(13): 0.0; Y(15): 0.0; S(18): 100.0	3.20928e+07	0	5.461e-10	47.28	0.000557463	2	2160.93	3.35937	28.3394	0
High	GRAEGEWEDQEALDYFsDKESGK	1	1	1	Q9NYF8	S17(Phospho)	0	Y(15): 0.0; S(17): 100.0; S(21): 0.0	1.61287e+07	0	3.317e-13	61.3	2.43891e-05	3	2726.13	3.14183	20.0665	2
High	AEGEWEDQEALDYFsDK	1	1	1	Q9NYF8	S15(Phospho)	0	Y(13): 1.5; S(15): 98.5	3.23794e+06	0.004	0.05907	22.46	0.116347	2	2111.82	1.95247	27.5477	0
High	AEGEWEDQEALDYFsDKESGK	2	1	1	Q9NYF8	S15(Phospho)	0	Y(13): 0.0; S(15): 100.0; S(19): 0.0	1.60154e+08	0	5.076e-13	85.54	7.10702e-08	2	2513.02	5.07768	23.4417	1
High	NTPSQHSHSIQHsPER	1	1	1	Q9NYF8	S13(Phospho)	0	T(2): 0.0; S(4): 0.0; S(7): 0.0; S(9): 0.0; S(13): 100.0	1.20636e+07	0.001	0.0145	14.47	1.02537	3	1921.83	1.04283	5.16302	0
High	KAEGEPQEEsPLK	2	1	1	Q9NYF8	S10(Phospho)	0	S(10): 100.0	6.08181e+07	0	6.102e-12	82.12	1.25207e-07	2	1521.69	3.41848	8.23386	1
High	KAEGEPQEEsPLKSK	2	1	1	Q9NYF8	S10(Phospho)	0	S(10): 100.0; S(14): 0.0	2.15949e+07	0	8.678e-10	54.97	8.4222e-05	3	1736.82	7.56389	6.57198	2
High	sQEEPKDTFEHDPSESIDEFNK	1	1	1	Q9NYF8	S1(Phospho)	0	S(1): 100.0; T(8): 0.0; S(14): 0.0; S(16): 0.0	2.13443e+07	0	7.156e-07	36.66	0.00689399	3	2688.1	1.93133	18.5708	1
High	ISSSsFSR	1	1	1	P05787	S5(Phospho)	0	S(2): 0.0; S(3): 0.0; S(4): 0.0; S(5): 100.0; S(7): 0.0	4.55834e+06	0.007	0.07829	31.56	0.00743618	2	950.398	-0.0605565	11.7309	0
High	LVsESSDVLPK	1	1	1	P05787	S3(Phospho)	0	S(3): 100.0; S(5): 0.0; S(6): 0.0	2.96822e+06	0	0.0008158	31.27	0.0199675	2	1253.6	1.69875	21.1503	0
High	AsLEAAIADAEQR	1	1	1	P05787	S2(Phospho)	0	S(2): 100.0	3.143e+06	0	1.413e-07	56.25	5.21702e-05	2	1424.64	0.0708963	23.485	0
High	sYTSGPGSR	1	1	1	P05787	S1(Phospho)	0	S(1): 0.6; Y(2): 49.4; T(3): 49.4; S(4): 0.6; S(8): 0.0	1.18021e+08	0.009	0.09949	38.31	0.00118057	2	991.393	4.51122	7.29678	0
High	sLDMDSIIAEVK	1	1	1	P05787	S1(Phospho)	0	S(1): 100.0; S(6): 0.0	1.28726e+06	0	0.0001819	27.01	0.0448897	2	1400.64	2.29079	32.6979	0
High	KGAAPtPPGK	1	1	1	Q13428	T6(Phospho)	0	T(6): 100.0	1.96008e+07	0	0.0009464	28.4	0.026307	2	1003.5	0.322764	6.03125	1
High	VGDVtPQVK	1	1	1	Q13428	T5(Phospho)	0	T(5): 100.0	3.65334e+06	0	0.001088	39.11	0.00160181	2	1022.49	0.851918	12.3848	0
High	AASAPAKEsPR	1	1	1	Q13428	S9(Phospho)	0	S(3): 0.0; S(9): 100.0	6.91868e+07	0	1.934e-05	59.34	2.2002e-05	2	1164.54	1.04724	4.59817	1
High	AALAPAKEsPR	2	1	1	Q13428	S9(Phospho)	0	S(9): 100.0	8.80716e+07	0	0.0001346	56.28	4.21554e-05	2	1190.59	0.684783	7.46226	1
High	ASSVSTKEsPAR	2	1	1	Q13428	S9(Phospho)	0	S(2): 0.0; S(3): 0.0; S(5): 0.0; T(6): 0.0; S(9): 100.0	2.1279e+07	0	0.0006024	35.3	0.00503181	3	1299.6	1.31273	5.33298	1
High	AALAPAKEsPRK	1	1	1	Q13428	S9(Phospho)	0	S(9): 100.0	4.8169e+06	0.009	0.1007	20.34	0.160435	3	1318.69	-1.05765	5.86885	2
High	PTSsPAKGPPQK	1	1	1	Q13428	S4(Phospho)	0	T(2): 0.0; S(3): 1.4; S(4): 98.6	1.06019e+07	0.001	0.005125	12.5	1.14155	2	1274.61	-0.989895	5.29364	1
High	LDSsPSVSSTLAAK	1	1	1	Q13428	S4(Phospho)	0	S(3): 0.0; S(4): 100.0; S(6): 0.0; S(8): 0.0; S(9): 0.0; T(10): 0.0	6.76588e+07	0	6.558e-07	61.19	1.75635e-05	2	1442.68	0.708471	17.684	0
High	KLsGDQPAAR	2	1	1	Q13428	S3(Phospho)	0	S(3): 100.0	1.30296e+08	0	5.461e-05	61.42	1.29799e-05	2	1122.53	-0.045668	5.95865	1
High	SPAGPAATPAQAQAAsTPR	2	1	1	Q13428	S16(Phospho)	0	S(1): 0.0; T(8): 0.0; S(16): 50.0; T(17): 50.0	3.77686e+06	0	1.963e-05	21.65	0.214406	2	1829.86	1.28572	13.0353	0
High	TSQVGAASAPAKEsPR	2	1	1	Q13428	S14(Phospho)	0	T(1): 0.0; S(2): 0.0; S(8): 0.0; S(14): 100.0	9.87385e+07	0	2.115e-10	79.89	2.72311e-07	2	1636.78	4.15708	7.52812	1
High	KLGAGEGGEASVsPEK	1	1	1	Q13428	S13(Phospho)	0	S(11): 0.0; S(13): 100.0	2.80716e+07	0	0.002177	12.42	1.37757	2	1595.73	2.07706	9.27218	1
High	QEAKPQQAAGMLsPK	2	1	1	Q13428	S13(Phospho)	0	S(13): 100.0	1.34477e+07	0	0.000261	54.94	8.40043e-05	2	1663.79	1.82149	12.4118	1
High	SLGNILQAKPTSsPAK	1	1	1	Q13428	S13(Phospho)	0	S(1): 0.0; T(11): 0.8; S(12): 0.8; S(13): 98.5	1.30623e+07	0	7.58e-08	69.17	2.58463e-06	2	1691.87	0.864649	17.2272	1
High	KSAEPSANTTLVsETEEEGSVPAFGAAAK	3	1	1	Q13428	S13(Phospho)	0	S(2): 0.0; S(6): 0.0; T(9): 1.0; T(10): 1.0; S(13): 49.0; T(15): 49.0; S(20): 0.0	2.25774e+07	0	1.39e-12	29.38	0.0418127	3	2958.36	0.205026	22.7572	1
High	LGAGEGGEASVsPEK	1	1	1	Q13428	S12(Phospho)	0	S(10): 0.0; S(12): 100.0	1.3478e+08	0	4.178e-15	101.3	1.50115e-09	2	1467.64	0.594377	12.4808	0
High	sPQVKPASTMGMGPLGK	1	1	1	Q13428	S1(Phospho)	0	S(1): 100.0; S(8): 0.0; T(9): 0.0	4.80959e+06	0	0.0001641	24.93	0.0899825	2	1765.84	3.21041	18.0072	1
High	TVIIEQSWGsPK	1	1	1	P10809	S10(Phospho)	0	T(1): 0.0; S(7): 0.0; S(10): 100.0	7.41451e+06	0	2.966e-06	59.14	2.97433e-05	2	1424.68	0.938439	22.7357	0
High	DWEDDsDEDmSNFDR	4	1	1	Q15185	S6(Phospho); M10(Oxidation)	0	S(6): 100.0; S(11): 0.0	1.7402e+08	0	2.718e-11	106.76	7.3802e-11	2	1971.63	1.43657	21.1823	0
High	DWEDDsDEDMSNFDR	2	1	1	Q15185	S6(Phospho)	0	S(6): 100.0; S(11): 0.0	2.97851e+06	0	2.94e-08	65.52	1.2905e-06	2	1955.63	1.15767	25.8216	0
High	KEKtPELPEPSVK	1	1	1	Q8IYB3	T4(Phospho)	0	T(4): 100.0; S(11): 0.0	2.98008e+06	0.001	0.007978	21.64	0.136412	2	1561.79	1.72518	11.8935	2
High	RRtPtPPPR	1	1	1	Q8IYB3	T3(Phospho); T5(Phospho)	0	T(3): 100.0; T(5): 100.0	1.6268e+06	0.003	0.04467	14.27	0.71081	3	1237.56	0.0764584	5.61897	2
High	EKtPELPEPSVK	2	1	1	Q8IYB3	T3(Phospho)	0	T(3): 100.0; S(10): 0.0	115247737	0	0.0003008	38.08	0.00350092	2	1433.69	0.771953	15.0372	1
High	tAsPPPPPK	1	1	1	Q8IYB3	T1(Phospho); S3(Phospho)	0	T(1): 100.0; S(3): 100.0	1.57888e+07	0	0.001885	36.12	0.00248008	2	1051.43	-0.772982	12.6232	0
High	tAsPPPPPKR	1	1	1	Q8IYB3	T1(Phospho); S3(Phospho)	0	T(1): 100.0; S(3): 100.0	1.95177e+07	0.001	0.01751	31.76	0.0101021	2	1207.53	0.502125	8.31792	1
High	tPELPEPSVK	1	1	1	Q8IYB3	T1(Phospho)	0	T(1): 100.0; S(8): 0.0	3.26989e+06	0	9.705e-05	36.32	0.00407188	2	1176.55	-1.24089	19.1537	0
High	KPPAPPsPVQSQSPsTNWSPAVPVK	3	1	1	Q8IYB3	S7(Phospho); S15(Phospho)	0	S(7): 99.9; S(11): 1.3; S(13): 1.3; S(15): 48.2; T(16): 48.2; S(19): 1.2	7.91607e+06	0	2.638e-06	27.03	0.0686599	3	2743.29	-0.579385	24.5458	1
High	KPPAPPsPVQSQsPSTNWSPAVPVKK	4	1	1	Q8IYB3	S7(Phospho); S13(Phospho)	0	S(7): 100.0; S(11): 48.8; S(13): 48.8; S(15): 1.2; T(16): 1.2; S(19): 0.0	1.15026e+07	0	5.352e-05	21.72	0.202566	3	2871.39	0.892138	20.3722	2
High	KPPAPPsPVQsQSPSTNWsPAVPVK	2	1	1	Q8IYB3	S7(Phospho); S11(Phospho); S19(Phospho)	0	S(7): 100.0; S(11): 2.7; S(13): 94.6; S(15): 5.2; T(16): 2.8; S(19): 94.7	6.41479e+07	0	1.684e-05	12.92	1.97055	3	2823.25	-0.289868	28.5693	1
High	KPPAPPsPVQsQSPSTNWsPAVPVKK	2	1	1	Q8IYB3	S7(Phospho); S11(Phospho); S19(Phospho)	0	S(7): 100.0; S(11): 50.0; S(13): 50.0; S(15): 0.1; T(16): 0.1; S(19): 99.9	2.06161e+07	0	6.431e-06	37.88	0.00593878	3	2951.35	1.31534	23.1988	2
High	APQTSSsPPPVR	4	1	1	Q8IYB3	S7(Phospho)	0	T(4): 0.0; S(5): 0.0; S(6): 0.0; S(7): 100.0	1.75076e+08	0	9.252e-06	58.55	3.68641e-05	2	1303.61	0.868344	10.4452	0
High	KPPAPPsPVQSQSPSTNWSPAVPVK	2	1	1	Q8IYB3	S7(Phospho)	0	S(7): 100.0; S(11): 0.0; S(13): 0.0; S(15): 0.0; T(16): 0.0; S(19): 0.0	1.43906e+07	0	1.652e-08	31.31	0.0166781	3	2663.33	2.00124	21.6343	1
High	KVELsESEEDKGGK	2	1	1	Q8IYB3	S5(Phospho)	0	S(5): 100.0; S(7): 0.0	7.60354e+06	0	7.446e-05	27.38	0.0448799	3	1614.73	0.0396357	6.45025	2
High	KETEsEAEDNLDDLEK	2	1	1	Q8IYB3	S5(Phospho)	0	T(3): 0.0; S(5): 100.0	2.94287e+07	0	7.03e-15	158.48	3.65407e-15	2	1944.8	0.670733	16.1496	1
High	HRPsPPAtPPPK	3	1	1	Q8IYB3	S4(Phospho); T8(Phospho)	0	S(4): 100.0; T(8): 100.0	9.49775e+07	0	0.001032	29.97	0.0210449	3	1441.64	2.66507	7.52426	1
High	KAAsPsPQSVR	1	1	1	Q8IYB3	S4(Phospho); S6(Phospho)	0	S(4): 100.0; S(6): 100.0; S(9): 0.0	1.96744e+07	0.001	0.0141	24	0.0656877	2	1287.56	4.37885	7.54903	1
High	KAAsPSPQSVR	1	1	1	Q8IYB3	S4(Phospho)	0	S(4): 100.0; S(6): 0.0; S(9): 0.0	5895208	0	1.184e-06	59.29	2.36699e-05	2	1207.58	0.441761	6.10021	1
High	RQsPSPStRPIR	1	1	1	Q8IYB3	S3(Phospho); T8(Phospho)	0	S(3): 100.0; S(5): 0.8; S(7): 0.0; T(8): 99.2	5.52123e+07	0	0.003004	28.96	0.0305573	2	1541.7	1.38671	7.34026	2
High	RLsPsASPPR	2	1	1	Q8IYB3	S3(Phospho); S5(Phospho)	0	S(3): 100.0; S(5): 98.8; S(7): 1.2	4.15793e+07	0.001	0.01763	21.19	0.120132	2	1227.53	0.724303	11.7914	1
High	RAsPsPPPKR	2	1	1	Q8IYB3	S3(Phospho); S5(Phospho)	0	S(3): 100.0; S(5): 100.0	1.02473e+06	0.002	0.02021	12	0.9559	3	1252.56	0.192818	4.66143	2
High	RRsPsPAPPPR	1	1	1	Q8IYB3	S3(Phospho); S5(Phospho)	0	S(3): 100.0; S(5): 100.0	4.99783e+07	0	0.00152	19.81	0.225137	3	1377.62	0.248626	6.03753	2
High	REsPsPAPKPR	1	1	1	Q8IYB3	S3(Phospho); S5(Phospho)	0	S(3): 100.0; S(5): 100.0	4.98468e+07	0.001	0.008348	39.92	0.00212376	2	1381.6	1.33498	5.96428	2
High	TAsPPPPPK	1	1	1	Q8IYB3	S3(Phospho)	0	T(1): 0.0; S(3): 100.0	2.80069e+07	0.001	0.006656	35.29	0.0035792	2	971.46	0.128879	9.18862	0
High	AAsPSPQSVR	1	1	1	Q8IYB3	S3(Phospho)	0	S(3): 100.0; S(5): 0.0; S(8): 0.0	3.23474e+07	0	8.235e-05	47.28	0.000264702	2	1079.49	0.154285	8.40284	0
High	RYsPPIQR	1	1	1	Q8IYB3	S3(Phospho)	0	Y(2): 0.0; S(3): 100.0	7.89107e+06	0.008	0.09169	18.88	0.259486	3	1096.53	0.212689	9.66583	1
High	TAsPPPPPKR	2	1	1	Q8IYB3	S3(Phospho)	0	T(1): 0.0; S(3): 100.0	1.44157e+07	0.003	0.03841	20.86	0.14069	2	1127.56	0.232826	6.77466	1
High	REsPSPAPKPR	2	1	1	Q8IYB3	S3(Phospho)	0	S(3): 100.0; S(5): 0.0	2.85955e+07	0	0.0002306	38.35	0.00285125	3	1301.64	1.82245	5.15593	2
High	VPKPEPIPEPKEPsPEK	1	1	1	Q8IYB3	S14(Phospho)	0	S(14): 100.0	4.12116e+07	0	3.174e-07	23.35	0.105192	3	1978	1.90759	13.2426	2
High	sPsPAPPPR	1	1	1	Q8IYB3	S1(Phospho); S3(Phospho)	0	S(1): 100.0; S(3): 100.0	2.36612e+07	0.002	0.03314	16.77	0.221949	2	1065.42	0.477331	12.9565	0
High	KPAtPAEDDEDDDIDLFGsDNEEEDKEAAQLR	1	1	1	P29692	T4(Phospho); S19(Phospho)	0	T(4): 100.0; S(19): 100.0	1.13451e+08	0	2.121e-11	41.13	0.0026442	3	3737.52	7.86647	24.8666	2
High	KPATPAEDDEDDDIDLFGsDNEEEDKEAAQLR	6	1	1	P29692	S19(Phospho)	0	T(4): 0.0; S(19): 100.0	1.17235e+09	0	3.607e-16	78.16	6.10263e-07	3	3657.53	2.67124	22.8189	2
High	PATPAEDDEDDDIDLFGsDNEEEDKEAAQLR	1	1	1	P29692	S18(Phospho)	0	T(3): 0.1; S(18): 99.9	1.33565e+07	0	0.0006156	14.05	1.38726	3	3529.43	0.865744	25.9085	1
High	ATAPQTQHVsPmR	2	1	1	P29692	S10(Phospho); M12(Oxidation)	0	T(2): 0.0; T(6): 0.0; S(10): 100.0	1.86676e+08	0	3.204e-05	31.91	0.0149447	2	1519.68	2.67945	7.0367	0
High	ATAPQTQHVsPMR	2	1	1	P29692	S10(Phospho)	0	T(2): 0.0; T(6): 0.0; S(10): 100.0	3.16395e+08	0	4.243e-06	61.51	1.65278e-05	2	1503.68	1.59932	8.95102	0
High	KISENSySLDDLEIGPGQLSSSTFDSEK	4	1	1	Q9UHB6	Y7(Phospho)	0.0164	S(3): 1.2; S(6): 1.2; Y(7): 97.5; S(8): 0.0; S(20): 0.0; S(21): 0.0; S(22): 0.0; T(23): 0.0; S(26): 0.0	5.06158e+07	0	2.418e-13	60.47	3.60766e-05	3	3126.43	9.23485	28.6607	1
High	ASSLSESsPPK	1	1	1	Q9UHB6	S8(Phospho)	0	S(2): 0.0; S(3): 0.0; S(5): 0.0; S(7): 1.1; S(8): 98.9	1.06055e+08	0	1.734e-05	45.61	0.000692469	2	1169.51	1.22706	9.65865	0
High	ETPHsPGVEDAPIAK	2	1	1	Q9UHB6	S5(Phospho)	0	T(2): 0.0; S(5): 100.0	1.86446e+08	0	2.251e-05	36.41	0.00567971	2	1627.74	1.77124	13.1933	0
High	TVsPPIR	1	1	1	Q9UHB6	S3(Phospho)	0	T(1): 0.0; S(3): 100.0	6.26111e+07	0.009	0.1023	31.49	0.00819562	2	849.423	-0.0130305	14.1774	0
High	PLsPDSR	1	1	1	Q9UHB6	S3(Phospho)	0	S(3): 100.0; S(6): 0.0	1.64187e+07	0.004	0.05286	55.06	2.08966e-05	2	851.365	-1.24221	8.01336	0
High	LRsPPEALVQGR	2	1	1	Q9UHB6	S3(Phospho)	0	S(3): 100.0	1.94511e+07	0	0.001434	36.56	0.00455953	3	1402.72	-1.02415	14.4708	1
High	GWsMSEQSEESVGGR	1	1	1	Q9UHB6	S3(Phospho)	0	S(3): 100.0; S(5): 0.0; S(8): 0.0; S(11): 0.0	2.91959e+06	0	6.198e-07	36.8	0.00294591	2	1705.65	1.40149	18.9765	0
High	EGHSLEMENENLVENGADsDEDDNSFLK	1	1	1	Q9UHB6	S19(Phospho)	0	S(4): 0.0; S(19): 100.0; S(25): 0.0	5.55784e+07	0	1.225e-14	117.17	5.55455e-11	3	3217.29	2.13454	24.7717	0
High	SEVQQPVHPKPLsPDSR	3	1	1	Q9UHB6	S13(Phospho)	0	S(1): 0.0; S(13): 100.0; S(16): 0.0	2.46117e+08	0	7.594e-07	28.47	0.0367672	3	1980.96	1.3816	11.3599	1
High	EGHSLEmENENLVENGADsDEDDNSFLK	1	1	1	Q9UHB6	M7(Oxidation); S19(Phospho)	0	S(4): 0.0; S(19): 100.0; S(25): 0.0	2.17688e+07	0	7.843e-13	62.38	1.62156e-05	3	3233.28	1.46918	22.8207	0
High	NStPSEPGSGR	1	1	1	P51858	T3(Phospho)	0	S(2): 0.0; T(3): 100.0; S(5): 0.0; S(9): 0.0	3.31477e+06	0	0.0002843	49.08	0.00015264	2	1168.46	0.512079	6.47446	0
High	RAGDLLEDsPK	1	1	1	P51858	S9(Phospho)	0	S(9): 100.0	1.18082e+08	0	0.0002317	49.42	0.000200004	2	1280.59	-0.753114	12.1976	1
High	AGDLLEDsPK	2	1	1	P51858	S8(Phospho)	0	S(8): 100.0	1.30729e+08	0	0.0002934	46.61	0.000300125	2	1124.49	0.268617	15.9763	0
High	AGDLLEDsPKRPK	4	1	1	P51858	S8(Phospho)	0	S(8): 100.0	5.0306e+08	0	3.75e-10	35.72	0.00602813	3	1505.74	-0.186204	9.27389	2
High	KGNAEGSsDEEGKLVIDEPAK	2	1	1	P51858	S8(Phospho)	0	S(7): 1.6; S(8): 98.4	1.82916e+07	0	7.158e-09	42.24	0.00197917	3	2253.03	1.22002	12.888	2
High	KGNAEGssDEEGKLVIDEPAK	3	1	1	P51858	S7(Phospho); S8(Phospho)	0	S(7): 100.0; S(8): 100.0	67827805	0	1.817e-05	17.79	0.484885	3	2332.99	-0.139485	15.4779	2
High	GNAEGSsDEEGKLVIDEPAK	1	1	1	P51858	S7(Phospho)	0	S(6): 1.4; S(7): 98.6	2.13753e+07	0	1.952e-07	39.78	0.00323478	3	2124.94	0.97728	16.0792	1
High	GNAEGssDEEGKLVIDEPAK	3	1	1	P51858	S6(Phospho); S7(Phospho)	0	S(6): 100.0; S(7): 100.0	1.81595e+08	0	4.408e-10	52.62	0.000138669	2	2204.9	1.65749	20.1098	1
High	GNAEGssDEEGKLVIDEPAKEK	1	1	1	P51858	S6(Phospho); S7(Phospho)	0	S(6): 100.0; S(7): 100.0	3.37966e+07	0	0.0002832	25.4	0.0961825	3	2462.04	1.45545	15.8278	2
High	GNAEGsSDEEGKLVIDEPAKEK	2	1	1	P51858	S6(Phospho)	0	S(6): 50.0; S(7): 50.0	4.46343e+06	0	0.0008289	19.26	0.428063	3	2382.07	1.10375	13.1882	2
High	ESEDKPEIEDVGsDEEEEK	2	1	1	P07900	S13(Phospho)	0	S(2): 0.0; S(13): 100.0	1.087e+07	0	0.0001332	43.2	0.00100034	2	2272.88	-1.83929	14.0247	1
High	QPLLLsEDEEDTKR	2	2	1	Q99613	S6(Phospho)	0	S(6): 100.0; T(12): 0.0	1.67214e+08	0	6.15e-08	81.3	2.30177e-07	2	1752.81	1.80562	16.7696	1
High	FEEESKEPVADEEEEDsDDDVEPITEFR	1	1	1	P54105	S17(Phospho)	0	S(5): 0.0; S(17): 100.0; T(25): 0.0	5.39511e+08	0	5.188e-15	81.62	2.16581e-07	3	3394.36	1.49872	24.2513	1
High	VAVAtPAKK	1	1	1	P19338	T5(Phospho)	0	T(5): 100.0	7.24587e+06	0	4.84e-06	59.08	1.53875e-05	2	964.523	0.179863	6.05864	1
High	KVVVsPTK	1	1	1	P19338	S5(Phospho)	0	S(5): 100.0; T(7): 0.0	1.5186e+08	0.001	0.01032	52.22	7.94723e-05	2	937.513	0.884869	6.46037	1
High	KVVVsPTKK	3	1	1	P19338	S5(Phospho)	0	S(5): 50.0; T(7): 50.0	1.83438e+08	0.001	0.006129	52.8	4.61831e-05	2	1065.61	0.836438	3.43551	2
High	KEDSDEEEDDDsEEDEEDDEDEDEDEDEIEPAAMK	1	1	1	P19338	S12(Phospho)	0	S(4): 0.1; S(12): 99.9	1.02195e+07	0.001	0.003777	11.08	0.861712	3	4199.42	3.16052	20.3498	1
High	aDVLDLHEAGGEDFAMDEDGDEsIHK	1	1	1	Q9Y5S9	N-Term(Acetyl); S23(Phospho)	0	S(23): 100.0	6.68153e+06	0	2.707e-08	73.9	1.1977e-06	3	2937.17	-1.10211	28.7685	0
High	mREDyDSVEQDGDEPGPQR	2	1	1	Q9Y5S9	M1(Oxidation); Y5(Phospho)	0	Y(5): 50.0; S(7): 50.0	1.58447e+06	0	0.0007614	12.77	1.1203	3	2318.89	0.937476	12.3951	1
High	SDAGLESDtAmK	2	1	1	Q9NR30	T9(Phospho); M11(Oxidation)	0	S(1): 0.0; S(7): 1.0; T(9): 99.0	1.74335e+06	0	0.000295	29.13	0.0138674	2	1320.5	0.580231	10.4696	0
High	EEPSQNDIsPK	1	1	1	Q9NR30	S9(Phospho)	0	S(4): 0.0; S(9): 100.0	1.14186e+07	0	3.233e-06	50.77	0.00011851	2	1323.54	-2.70337	10.6222	0
High	VTKNEEPsEEEIDAPKPK	1	1	1	Q9NR30	S8(Phospho)	0	T(2): 0.0; S(8): 100.0	5.69989e+06	0	0.001879	19.39	0.364804	3	2119.98	2.12817	10.2228	2
High	NEEPsEEEIDAPKPK	2	1	1	Q9NR30	S5(Phospho)	0	S(5): 100.0	2.33045e+08	0	3.749e-07	82.58	1.39676e-07	2	1791.77	1.81598	12.4791	1
High	KKAEPSEVDMNsPK	2	1	1	Q9NR30	S12(Phospho)	0	S(6): 0.0; S(12): 100.0	1.12585e+07	0	1.971e-07	43.11	0.00117521	3	1639.74	0.0237728	6.99222	2
High	KAEPSEVDMNsPK	1	1	1	Q9NR30	S11(Phospho)	0	S(5): 0.0; S(11): 100.0	2.73177e+07	0	0.002667	20.64	0.181225	2	1511.65	1.20514	8.94931	1
High	KKEEPSQNDIsPK	2	1	1	Q9NR30	S11(Phospho)	0	S(6): 0.0; S(11): 100.0	2.32941e+08	0	1.332e-11	80.26	2.29821e-07	2	1579.74	1.83139	5.98163	2
High	AEPSEVDMNsPK	1	1	1	Q9NR30	S10(Phospho)	0	S(4): 0.0; S(10): 100.0	2.14963e+07	0	1.061e-08	63.9	6.09034e-06	2	1383.55	-0.00723772	12.9031	0
High	KEEPSQNDIsPK	1	1	1	Q9NR30	S10(Phospho)	0	S(5): 0.0; S(10): 100.0	6.4179e+06	0	0.0001889	50.45	0.000164988	2	1451.64	1.23569	7.20737	1
High	AEPSEVDmNsPK	1	1	1	Q9NR30	M8(Oxidation); S10(Phospho)	0	S(4): 0.0; S(10): 100.0	7.14097e+06	0.001	0.004406	20.46	0.111088	2	1399.54	-0.734903	8.9071	0
High	KKAEPSEVDmNsPK	1	1	1	Q9NR30	M10(Oxidation); S12(Phospho)	0	S(6): 0.0; S(12): 100.0	5.55365e+06	0	7.695e-07	30.69	0.0216261	3	1655.73	-0.591601	5.49982	2
High	EVAAtEEDVTRLPSPTSPFSSLSQDQAATSK	1	1	1	Q8WWI1	T5(Phospho)	0	T(5): 92.6; T(10): 1.9; S(14): 1.9; T(16): 1.9; S(17): 1.9; S(20): 0.0; S(21): 0.0; S(23): 0.0; T(29): 0.0; S(30): 0.0	2.00552e+07	0	2.769e-09	50.08	0.000352448	3	3329.54	0.769061	26.834	1
High	VTTEIQLPsQSPVEEQSPASLSSLR	2	1	1	Q8WWI1	S9(Phospho)	0	T(2): 0.0; T(3): 0.0; S(9): 50.0; S(11): 50.0; S(17): 0.0; S(20): 0.0; S(22): 0.0; S(23): 0.0	2.18833e+07	0	1.117e-07	32.94	0.0156767	3	2763.35	2.98958	28.4744	0
High	EGFEsDTDSEFTFK	2	1	1	Q8WWI1	S5(Phospho)	0	S(5): 49.7; T(7): 49.7; S(9): 0.6; T(12): 0.0	2.45049e+06	0	0.001039	18.57	0.203628	2	1718.65	1.79194	26.5748	0
High	SHsPSASQSGSQLR	1	1	1	Q8WWI1	S3(Phospho)	0	S(1): 0.0; S(3): 100.0; S(5): 0.0; S(7): 0.0; S(9): 0.0; S(11): 0.0	7.32569e+06	0	4.355e-08	61.34	1.53513e-05	2	1508.65	1.29533	6.26578	0
High	MYsFDDVLEEGK	1	1	1	Q8WWI1	S3(Phospho)	0	Y(2): 0.0; S(3): 100.0	8.45739e+06	0	3.176e-08	83.26	6.27844e-08	2	1512.6	-0.799855	28.8783	0
High	SAsVNKEPVSLPGIMR	1	1	1	Q8WWI1	S3(Phospho)	0	S(1): 1.4; S(3): 98.6; S(10): 0.0	2.77925e+06	0	0.001814	14.16	1.03985	3	1764.87	1.28061	22.0271	1
High	LPsPTSPFSSLSQDQAATSK	2	1	1	Q8WWI1	S3(Phospho)	0	S(3): 100.0; T(5): 0.0; S(6): 0.0; S(9): 0.0; S(10): 0.0; S(12): 0.0; T(18): 0.0; S(19): 0.0	1.47967e+07	0	1.915e-11	61.38	2.37984e-05	2	2128.98	0.403099	26.5233	0
High	ATLSSTSGLDLMSESGEGEIsPQR	2	1	1	Q8WWI1	S21(Phospho)	0	T(2): 0.0; S(4): 0.0; S(5): 0.0; T(6): 0.0; S(7): 0.0; S(13): 0.0; S(15): 0.0; S(21): 100.0	8.56568e+06	0	5.618e-08	52.16	0.000223186	2	2532.12	2.79326	26.9363	0
High	TSTTGVATTQsPTPR	1	1	1	Q8WWI1	S11(Phospho)	0	T(1): 0.0; S(2): 0.0; T(3): 0.0; T(4): 0.0; T(8): 0.0; T(9): 0.0; S(11): 100.0; T(13): 0.0	3.70436e+06	0	1.649e-07	63.82	1.09963e-05	2	1584.73	1.7248	11.3495	0
High	ATLSSTSGLDLmSESGEGEIsPQR	1	1	1	Q8WWI1	M12(Oxidation); S21(Phospho)	0	T(2): 0.0; S(4): 0.0; S(5): 0.0; T(6): 0.0; S(7): 0.0; S(13): 0.0; S(15): 0.0; S(21): 100.0	8.38156e+06	0	0.0004112	22.02	0.237092	3	2548.12	1.724	23.4581	0
High	mYsFDDVLEEGK	1	1	1	Q8WWI1	M1(Oxidation); S3(Phospho)	0	Y(2): 0.0; S(3): 100.0	3.96371e+06	0	4.817e-06	59.52	1.20621e-05	2	1528.59	1.65667	27.0273	0
High	LSLEGDHStPPSAYGSVK	1	2	1	P07355	T9(Phospho)	0	S(2): 0.0; S(8): 1.2; T(9): 98.7; S(12): 0.0; Y(14): 0.0; S(16): 0.0	6.18294e+06	0	1.607e-06	32.32	0.0188443	2	1924.87	0.856524	17.1963	0
High	SSGNSSSSGSGSGSTSAGSSsPGAR	1	1	1	Q12797	S21(Phospho)	0	S(1): 0.0; S(2): 0.0; S(5): 0.0; S(6): 0.0; S(7): 0.0; S(8): 0.0; S(10): 0.0; S(12): 0.0; S(14): 0.0; T(15): 0.0; S(16): 0.0; S(19): 0.0; S(20): 1.2; S(21): 98.8	1.36124e+07	0	1.372e-18	109.13	2.43138e-10	2	2182.85	1.70966	5.90017	0
High	TIGGGDDsFNTFFSETGAGK	1	5	2	P68363;Q9BQE3	S8(Phospho)	0	T(1): 0.0; S(8): 100.0; T(11): 0.0; S(14): 0.0; T(16): 0.0	4.85644e+07	0	1.862e-09	79.88	2.48266e-07	2	2087.86	1.37939	29.3494	0
High	PAVEASTGGEATQETGKEEAGKEEPPPLtPPAR	1	1	1	Q9C0C2	T29(Phospho)	0	S(6): 0.1; T(7): 0.1; T(12): 0.0; T(15): 0.0; T(29): 99.7	1.43919e+07	0	0.0005177	11.63	2.54559	4	3411.6	1.28967	15.4423	2
High	SFGTRPLsSGFSPEEAQQQDEEFEK	1	1	1	Q9C0C2	S8(Phospho)	0	S(1): 0.0; T(4): 0.0; S(8): 100.0; S(9): 0.0; S(12): 0.0	2.84442e+07	0	5.839e-10	64.12	1.48513e-05	3	2910.25	1.04688	22.5593	1
High	VSGAGFsPSSK	1	1	1	Q9C0C2	S7(Phospho)	0	S(2): 0.0; S(7): 0.8; S(9): 0.0; S(10): 99.2	4.35312e+06	0	5.117e-07	70.94	1.11545e-06	2	1103.48	-0.623858	11.9887	0
High	NRsAEEGELAESK	1	1	1	Q9C0C2	S3(Phospho)	0	S(3): 100.0; S(12): 0.0	2.33093e+06	0.001	0.004518	16.48	0.435192	2	1499.64	0.369924	7.37526	1
High	RFsEGVLQSPSQDQEK	2	1	1	Q9C0C2	S3(Phospho)	0	S(3): 100.0; S(9): 0.0; S(11): 0.0	1.66318e+07	0	7.191e-09	57.53	5.56302e-05	3	1914.86	1.47502	15.2835	1
High	RDsLGAYASQDANEQGQDLGK	1	1	1	Q9C0C2	S3(Phospho)	0	S(3): 100.0; Y(7): 0.0; S(9): 0.0	7.83894e+06	0	3.269e-10	57.88	5.71068e-05	3	2302.99	-0.417876	15.6855	1
High	LDsPPPSPITEASEAAEAAEAGNLAVSSR	3	1	1	Q9C0C2	S3(Phospho)	0.0345	S(3): 100.0; S(7): 0.0; T(10): 0.0; S(13): 0.0; S(27): 0.0; S(28): 0.0	2.14599e+07	0	1.831e-07	28	0.0602259	3	2917.35	0.915869	33.4539	0
High	AsPEPPGPESSSR	1	1	1	Q9C0C2	S2(Phospho)	0	S(2): 100.0; S(10): 0.0; S(11): 0.0; S(12): 0.0	3.6552e+07	0	9.28e-07	42.94	0.000780025	2	1377.57	0.710793	10.6965	0
High	GsGGLFSPSTAHVPDGALGQR	1	1	1	Q9C0C2	S2(Phospho)	0	S(2): 100.0; S(7): 0.0; S(9): 0.0; T(10): 0.0	4.8482e+06	0	0.0005436	16.88	0.590735	3	2090.97	0.320144	22.7854	0
High	DsLGAYASQDANEQGQDLGK	1	1	1	Q9C0C2	S2(Phospho)	0	S(2): 100.0; Y(6): 0.0; S(8): 0.0	4.61836e+06	0	5.729e-08	42.25	0.0016202	2	2146.9	2.19484	20.5673	0
High	HTPSPGLPAEGAPEAPRPsSPPPEVLEPHSLDQPPATSPR	2	1	1	Q9C0C2	S19(Phospho)	0	T(2): 3.4; S(4): 96.4; S(19): 0.1; S(20): 0.1; S(30): 0.0; T(37): 0.0; S(38): 0.0	3.56611e+07	0	2.994e-05	10.92	2.37874	4	4180.01	0.253328	21.4997	1
High	YESQEPLAGQEsPLPLATR	1	1	1	Q9C0C2	S12(Phospho)	0	Y(1): 0.0; S(3): 0.0; S(12): 100.0; T(18): 0.0	4.72798e+06	0	2.89e-06	34.84	0.0104826	2	2166.02	2.24501	25.3258	0
High	sQEADVQDWEFR	1	1	1	Q9C0C2	S1(Phospho)	0	S(1): 100.0	1.36268e+07	0	6.169e-09	80.68	1.42796e-07	2	1589.63	0.471038	24.4539	0
High	TEAQDLcRAsPEPPGPESSSR	1	1	1	Q9C0C2	C7(Carbamidomethyl); S10(Phospho)	0	T(1): 0.0; S(10): 100.0; S(18): 0.0; S(19): 0.0; S(20): 0.0	1.60131e+07	0	1.345e-06	21.82	0.214068	3	2351	1.81182	13.6208	1
High	TGSEsSQTGTSTTSSR	2	1	1	P23588	S5(Phospho)	0	T(1): 0.0; S(3): 33.3; S(5): 33.3; S(6): 33.3; T(8): 0.0; T(10): 0.0; S(11): 0.0; T(12): 0.0; T(13): 0.0; S(14): 0.0; S(15): 0.0	2.62824e+06	0	8.72e-13	85	5.47074e-08	2	1653.66	1.89956	5.95199	0
High	TGsEsSQTGTSTTSSR	1	1	1	P23588	S3(Phospho); S5(Phospho)	0	T(1): 1.4; S(3): 97.8; S(5): 50.4; S(6): 50.4; T(8): 0.0; T(10): 0.0; S(11): 0.0; T(12): 0.0; T(13): 0.0; S(14): 0.0; S(15): 0.0	7.35874e+06	0	1.201e-05	41.28	0.00072239	2	1733.63	1.51737	8.15491	0
High	SQSSDTEQQsPTSGGGK	3	1	1	P23588	S10(Phospho)	0	S(1): 0.0; S(3): 0.0; S(4): 0.0; T(6): 0.0; S(10): 100.0; T(12): 0.0; S(13): 0.0	1.85861e+07	0	8.568e-17	125.92	4.68221e-12	2	1760.7	1.56438	5.91737	0
High	EEDcHsPTSKPPKPDQPLK	4	1	1	P23588	C4(Carbamidomethyl); S6(Phospho)	0	S(6): 100.0; T(8): 0.0; S(9): 0.0	1.65844e+07	0	3.816e-06	22.38	0.190772	4	2270.02	0.549035	8.0855	2
High	TIGGGDDsFNTFFSETGAGK	1	5	2	P68363;Q9BQE3	S8(Phospho)	0	T(1): 0.0; S(8): 100.0; T(11): 0.0; S(14): 0.0; T(16): 0.0	4.85644e+07	0	1.862e-09	79.88	2.48266e-07	2	2087.86	1.37939	29.3494	0
High	RGNDPLtSSPGR	3	1	1	P49736	T7(Phospho)	0	T(7): 33.3; S(8): 33.3; S(9): 33.3	5.17512e+07	0.009	0.1034	13.32	0.884614	2	1336.6	1.04295	8.55209	1
High	GNDPLTSsPGR	1	1	1	P49736	S8(Phospho)	0	T(6): 0.0; S(7): 0.0; S(8): 100.0	1.09866e+08	0	1.39e-05	45.11	0.000390023	2	1180.5	-0.0212222	12.5648	0
High	RTDALTSsPGR	3	1	1	P49736	S8(Phospho)	0	T(2): 0.0; T(6): 0.0; S(7): 0.0; S(8): 100.0	1.0878e+08	0	0.0009979	38.29	0.00256476	3	1240.57	-0.247511	7.09499	1
High	TDALTSsPGR	1	1	1	P49736	S7(Phospho)	0	T(1): 0.0; T(5): 0.0; S(6): 0.0; S(7): 100.0	1.69772e+07	0	3.221e-05	48.26	0.000185107	2	1084.47	0.221726	10.1433	0
High	GLLYDsDEEDEERPAR	3	1	1	P49736	S6(Phospho)	0	Y(4): 0.0; S(6): 100.0	2.33005e+08	0	6.375e-05	41.19	0.00227338	2	1973.82	1.564	17.3672	1
High	aESSESFTMASsPAQR	1	1	1	P49736	N-Term(Acetyl); S12(Phospho)	0	S(3): 0.0; S(4): 0.0; S(6): 0.0; T(8): 0.0; S(11): 0.0; S(12): 100.0	3.54944e+07	0	4.544e-13	94.97	7.4351e-09	2	1807.72	0.804397	25.1936	0
High	aESSESFTmASsPAQR	2	1	1	P49736	N-Term(Acetyl); M9(Oxidation); S12(Phospho)	0	S(3): 0.0; S(4): 0.0; S(6): 0.0; T(8): 0.0; S(11): 1.2; S(12): 98.8	2.9822e+07	0	4.725e-06	38.87	0.00230898	2	1823.72	1.30982	20.9644	0
High	EVEDKEsEGEEEDEDEDLSK	1	1	1	O95218	S7(Phospho)	0	S(7): 100.0; S(19): 0.0	2.64943e+06	0	0.003024	17.52	0.32393	2	2419.91	1.83071	11.6521	1
High	YNLDAsEEEDSNK	1	1	1	O95218	S6(Phospho)	0	Y(1): 0.0; S(6): 100.0; S(11): 0.0	2.38674e+07	0	1.039e-09	83.4	4.73086e-08	2	1593.6	0.376817	13.7068	0
High	YNLDAsEEEDSNKK	2	1	1	O95218	S6(Phospho)	0	Y(1): 0.0; S(6): 100.0; S(11): 0.0	2.39914e+07	0	6.076e-06	51.84	0.000118489	2	1721.69	1.83812	10.3386	1
High	YNLDAsEEEDSNKKK	1	1	1	O95218	S6(Phospho)	0	Y(1): 0.0; S(6): 100.0; S(11): 0.0	6.97303e+06	0	1.198e-05	57.15	4.78026e-05	2	1849.79	1.11729	7.80982	2
High	EEsDGEYDEFGR	1	1	1	O95218	S3(Phospho)	0	S(3): 100.0; Y(7): 0.0	7.35575e+06	0	1.941e-07	63.48	3.05147e-06	2	1512.52	-0.0934998	17.7654	0
High	ENVEYIEREEsDGEYDEFGR	3	1	1	O95218	S11(Phospho)	0	Y(5): 0.0; S(11): 100.0; Y(15): 0.0	1.82551e+08	0	8.015e-06	34.67	0.00754036	3	2545	-3.03039	20.7928	1
High	ENVEYIEREEsDGEYDEFGRK	1	1	1	O95218	S11(Phospho)	0	Y(5): 1.3; S(11): 98.7; Y(15): 0.0	2.99554e+07	0	2.017e-05	24.86	0.104835	3	2673.1	1.13373	17.5203	2
High	DVtPPPETEVVLIK	1	1	1	P27816	T3(Phospho)	0	T(3): 100.0; T(8): 0.0	1.08167e+08	0	0.0003428	29.71	0.0240003	2	1616.82	0.480632	28.8766	0
High	EtERASPIKmDLAPSK	2	1	1	P27816	T2(Phospho); M10(Oxidation)	0	T(2): 50.0; S(6): 50.0; S(15): 0.0	6.68418e+06	0.001	0.004546	16.98	0.56927	3	1868.88	0.665555	10.9015	2
High	DGVLTLANNVtPAKDVPPLSETEATPVPIK	1	1	1	P27816	T11(Phospho)	0	T(5): 100.0; T(11): 0.0; S(20): 0.0; T(22): 0.0; T(25): 0.0	1.02185e+07	0	1.292e-05	13.76	0.612157	3	3166.63	0.131707	31.3784	1
High	ETERAsPIKMDLAPSK	1	1	1	P27816	S6(Phospho)	0	T(2): 0.8; S(6): 99.2; S(15): 0.0	1.70964e+07	0	1.253e-07	43.4	0.001225	3	1852.89	1.61628	14.3564	2
High	SKVGsTENIK	2	1	1	P27816	S5(Phospho)	0	S(1): 0.0; S(5): 50.0; T(6): 50.0	1.97165e+06	0.001	0.01682	24.33	0.0614348	2	1142.55	0.421573	6.10878	1
High	DMEsPTKLDVTLAK	1	1	1	P27816	S4(Phospho)	0	S(4): 100.0; T(6): 0.0; T(11): 0.0	1.86409e+08	0	1.274e-10	103.31	1.23431e-09	2	1627.77	0.892463	21.9303	1
High	RAsPSKPASAPASR	1	1	1	P27816	S3(Phospho)	0	S(3): 98.8; S(5): 1.2; S(9): 0.0; S(13): 0.0	12135658	0	2.339e-05	42.27	0.00129851	3	1462.72	0.576942	5.23106	2
High	DMsPLSETEMALGK	1	1	1	P27816	S3(Phospho)	0	S(3): 100.0; S(6): 0.0; T(8): 0.0	5.53397e+06	0	8.839e-11	76.2	4.12599e-07	2	1588.66	0.594216	30.1567	0
High	VGsLDNVGHLPAGGAVK	1	1	1	P27816	S3(Phospho)	0	S(3): 100.0	1.39001e+07	0	7.773e-05	30.64	0.0233004	2	1670.83	1.66073	18.5666	0
High	DmEsPTKLDVTLAK	3	1	1	P27816	M2(Oxidation); S4(Phospho)	0	S(4): 100.0; T(6): 0.0; T(11): 0.0	1.17151e+08	0	6.45e-07	33.65	0.0126867	2	1643.76	1.15531	19.5922	1
High	KcsLPAEEDSVLEK	1	1	1	P27816	C2(Carbamidomethyl); S3(Phospho)	0	S(3): 100.0; S(10): 0.0	2.05223e+07	0	5.522e-11	76.3	6.03639e-07	2	1684.75	1.60667	15.8968	1
High	EELMSsDLEETAGSTSIPK	3	1	1	O00567	S6(Phospho)	0	S(5): 50.0; S(6): 50.0; T(11): 0.0; S(14): 0.0; T(15): 0.0; S(16): 0.0	6.22125e+07	0	2.729e-10	89.31	3.44625e-08	2	2103.91	1.188	25.5431	0
High	SFSKEELMSsDLEETAGSTSIPK	3	1	1	O00567	S10(Phospho)	0	S(1): 0.0; S(3): 0.0; S(9): 1.8; S(10): 98.2; T(15): 0.0; S(18): 0.0; T(19): 0.0; S(20): 0.0	3.0121e+07	0	8.292e-09	75.55	9.66784e-07	3	2553.13	1.0564	23.3083	1
High	sTPKEETVNDPEEAGHR	3	1	1	O00567	S1(Phospho)	0	S(1): 50.0; T(2): 50.0; T(7): 0.0	5.60537e+06	0	7.309e-07	44.98	0.000827576	3	1975.84	1.51229	7.83456	1
High	SFSKEELmsSDLEETAGSTSIPK	2	1	1	O00567	M8(Oxidation); S9(Phospho)	0	S(1): 0.0; S(3): 0.0; S(9): 50.0; S(10): 50.0; T(15): 0.0; S(18): 0.0; T(19): 0.0; S(20): 0.0	1.87608e+07	0	2.757e-10	56.59	7.78446e-05	3	2569.13	0.653377	20.7191	1
High	EELmSsDLEETAGSTSIPK	4	1	1	O00567	M4(Oxidation); S6(Phospho)	0	S(5): 50.0; S(6): 50.0; T(11): 0.0; S(14): 0.0; T(15): 0.0; S(16): 0.0	3.62959e+07	0	4.359e-10	87.61	5.09738e-08	2	2119.9	1.38958	22.4291	0
High	KEESEEsDDDMGFGLFD	1	2	2	P05387;P05386	S7(Phospho)	0	S(4): 0.7; S(7): 99.3	1.7387e+08	0	1.459e-05	67.39	2.31635e-06	2	2029.73	2.40727	32.8719	1
High	KEEsEEsDDDmGFGLFD	2	2	2	P05387;P05386	S4(Phospho); S7(Phospho); M11(Oxidation)	0	S(4): 100.0; S(7): 100.0	2.69536e+09	0	1.166e-09	63.06	2.34798e-06	2	2125.69	0.143557	37.6655	1
High	KEEsEEsDDDMGFGLFD	4	2	2	P05387;P05386	S4(Phospho); S7(Phospho)	0	S(4): 100.0; S(7): 100.0	1.42759e+09	0	2.227e-06	51.47	5.16818e-05	2	2109.69	1.09032	42.3999	1
High	KEEsEESDDDmGFGLFD	2	2	2	P05387;P05386	S4(Phospho); M11(Oxidation)	0	S(4): 100.0; S(7): 0.0	1.16157e+08	0.001	0.003375	24.12	0.0356277	2	2045.72	1.77124	29.4904	1
High	YVASYLLAALGGNsSPSAK	2	1	1	P05387	S14(Phospho)	0	Y(1): 0.0; S(4): 0.0; Y(5): 0.0; S(14): 49.4; S(15): 49.4; S(17): 1.2	4.98465e+06	0	0.0003575	16.92	0.538575	2	1948.95	1.83983	33.0829	0
High	SNtPESIAETPPAR	2	1	1	Q9Y4H2	T3(Phospho)	0	S(1): 0.0; T(3): 100.0; S(6): 0.0; T(10): 0.0	3.47653e+06	0	1.244e-06	40.39	0.00219844	2	1549.69	1.44267	16.1101	0
High	SSEGGVGVGPGGGDEPPtSPR	2	1	1	Q9Y4H2	T18(Phospho)	0	S(1): 0.0; S(2): 0.0; T(18): 50.0; S(19): 50.0	9.54756e+06	0	0.000129	15.28	0.779751	2	1975.84	1.34946	16.1479	0
High	QRPVPQPsSASLDEYTLmR	3	1	1	Q9Y4H2	S8(Phospho); M18(Oxidation)	0	S(8): 33.3; S(9): 33.3; S(11): 33.3; Y(15): 0.0; T(16): 0.0	4.28493e+06	0.001	0.003836	17.06	0.621852	3	2271.05	2.08008	19.6637	1
High	TYsLTTPAR	1	1	1	Q9Y4H2	S3(Phospho)	0	T(1): 0.0; Y(2): 0.0; S(3): 100.0; T(5): 0.0; T(6): 0.0	1.06387e+07	0	0.0009053	47.15	0.000266962	2	1089.5	0.302987	16.0386	0
High	RVsGDAAQDLDR	1	1	1	Q9Y4H2	S3(Phospho)	0	S(3): 100.0	1.331e+07	0	0.0001202	38.75	0.002387	2	1382.61	0.569086	9.2552	1
High	TAsEGDGGAAAGAAAAGAR	2	1	1	Q9Y4H2	S3(Phospho)	0	T(1): 0.0; S(3): 100.0	1.43646e+07	0	7.586e-16	128.61	2.85771e-12	2	1611.68	1.49535	11.6794	0
High	HSsETFSSTTTVTPVSPSFAHNPK	4	1	1	Q9Y4H2	S3(Phospho)	0	S(2): 24.1; S(3): 24.1; T(5): 24.1; S(7): 24.1; S(8): 0.9; T(9): 0.9; T(10): 0.9; T(11): 0.9; T(13): 0.0; S(16): 0.0; S(18): 0.0	6.27037e+06	0	0.0005603	10.64	3.16282	3	2626.2	5.19864	17.5631	0
High	PVSVAGSPLsPGPVR	1	1	1	Q9Y4H2	S10(Phospho)	0	S(3): 0.0; S(7): 0.0; S(10): 100.0	9.50635e+06	0	1.124e-08	69.94	2.03796e-06	2	1499.77	2.71005	22.2269	0
High	sPGEYINIDFGEPGAR	1	1	1	Q9Y4H2	S1(Phospho)	0	S(1): 100.0; Y(5): 0.0	1.3782e+07	0	4.424e-08	64.31	9.19288e-06	2	1801.78	0.198906	28.8561	0
High	ASAVSELsPR	1	1	1	Q9Y2W1	S8(Phospho)	0	S(2): 0.0; S(5): 0.0; S(8): 100.0	1.50966e+08	0	2.125e-07	66.05	3.86127e-06	2	1096.5	-0.0152599	13.4965	0
High	WAHDKFsGEEGEIEDDEsGTENR	1	1	1	Q9Y2W1	S7(Phospho); S18(Phospho)	0	S(7): 100.0; S(18): 98.1; T(20): 1.9	1.02933e+07	0	6.415e-06	36.9	0.00366492	3	2797.03	0.515876	16.7001	1
High	WAHDKFsGEEGEIEDDESGTENR	1	1	1	Q9Y2W1	S7(Phospho)	0	S(7): 100.0; S(18): 0.0; T(20): 0.0	6.16172e+06	0	3.141e-07	32	0.0160894	3	2717.06	-1.37011	15.1313	1
High	RIDIsPSTFR	1	1	1	Q9Y2W1	S5(Phospho)	0	S(5): 100.0; S(7): 0.0; T(8): 0.0	42325369	0.001	0.003885	50.89	0.000153979	2	1271.62	2.87609	18.663	1
High	IDIsPSTFR	1	1	1	Q9Y2W1	S4(Phospho)	0	S(4): 100.0; S(6): 0.0; T(7): 0.0	1.92916e+08	0.001	0.005255	38.23	0.00282591	2	1115.51	0.36501	23.5205	0
High	GSFsDTGLGDGK	1	1	1	Q9Y2W1	S4(Phospho)	0	S(2): 0.0; S(4): 100.0; T(6): 0.0	1.46421e+07	0	8.754e-06	47.65	0.000359043	2	1220.48	-0.459454	16.2714	0
High	ERsPALKsPLQSVVVR	2	1	1	Q9Y2W1	S3(Phospho); S8(Phospho)	0	S(3): 100.0; S(8): 100.0; S(12): 0.0	4.41349e+07	0	2.121e-10	38.89	0.00321514	3	1925.96	0.723377	19.874	2
High	sPVGKsPPSTGSTYGSSQK	1	1	1	Q9Y2W1	S1(Phospho); S6(Phospho)	0	S(1): 100.0; S(6): 100.0; S(9): 0.0; T(10): 0.0; S(12): 0.0; T(13): 0.0; Y(14): 0.0; S(16): 0.0; S(17): 0.0	7.06654e+06	0	0.00249	19.81	0.27215	2	2011.84	1.43966	11.7931	1
High	sYsPAHNR	1	1	1	Q9Y2W1	S1(Phospho); S3(Phospho)	0	S(1): 98.9; Y(2): 1.1; S(3): 100.0	3.19684e+06	0.002	0.03229	33.53	0.00144173	2	1091.37	0.933138	6.30941	0
High	sPPSTGSTYGSSQK	1	1	1	Q9Y2W1	S1(Phospho)	0	S(1): 100.0; S(4): 0.0; T(5): 0.0; S(7): 0.0; T(8): 0.0; Y(9): 0.0; S(11): 0.0; S(12): 0.0	2.25701e+07	0	5.19e-09	90.35	1.62834e-08	2	1463.61	1.9988	8.5713	0
High	AQLEPVAsPAK	1	1	1	Q15149	S8(Phospho)	0	S(8): 100.0	1.6136e+07	0	0.0001437	40.18	0.00166936	2	1190.58	-0.024914	14.0987	0
High	ELEEVsPETPVVPATTQR	1	1	1	Q15149	S6(Phospho)	0	S(6): 100.0; T(9): 0.0; T(15): 0.0; T(16): 0.0	1.52513e+06	0.001	0.01758	10.57	2.574	2	2061.98	1.57141	23.5542	0
High	RGsFDATGSGFSmTFSSSSYSSSGYGR	5	1	1	Q15149	S3(Phospho); M13(Oxidation)	0	S(3): 100.0; T(7): 0.0; S(9): 0.0; S(12): 0.0; T(14): 0.0; S(16): 0.0; S(17): 0.0; S(18): 0.0; S(19): 0.0; Y(20): 0.0; S(21): 0.0; S(22): 0.0; S(23): 0.0; Y(25): 0.0	5.35259e+06	0	8.22e-08	50.56	0.000277771	3	2869.15	1.69275	21.9362	1
High	SSsVGSSSSYPISPAVSR	3	1	1	Q15149	S3(Phospho)	0	S(1): 0.0; S(2): 0.0; S(3): 100.0; S(6): 0.0; S(7): 0.0; S(8): 0.0; S(9): 0.0; Y(10): 0.0; S(13): 0.0; S(17): 0.0	1.33475e+08	0	8.856e-12	98.4	4.23514e-09	2	1834.83	1.80977	19.7887	0
High	TPHVQAVQGPLGsPPK	1	1	1	Q15149	S13(Phospho)	0	T(1): 0.0; S(13): 100.0	9.90534e+06	0.001	0.003616	24.42	0.0755347	2	1692.85	0.864797	16.025	0
High	TPHVQAVQGPLGsPPKR	1	1	1	Q15149	S13(Phospho)	0	T(1): 0.0; S(13): 100.0	9.63329e+06	0	2.71e-11	59.49	2.37854e-05	3	1848.95	0.495666	12.8561	1
High	EMLMEDVGsEEEQEEEDEAPFQEK	1	1	1	Q9H1E3	S9(Phospho)	0	S(9): 100.0	4.77032e+06	0	0.0001534	25.27	0.0701313	3	2937.12	0.0179933	27.8708	0
High	ATVTPsPVK	1	1	1	Q9H1E3	S6(Phospho)	0	T(2): 0.0; T(4): 0.0; S(6): 100.0	1.40264e+08	0	0.0008236	51.52	0.000106409	2	979.483	-3.26357	11.4274	0
High	ATVTPsPVKGK	1	1	1	Q9H1E3	S6(Phospho)	0	T(2): 0.0; T(4): 0.0; S(6): 100.0	1.2986e+07	0	4.629e-05	47.55	0.000287421	2	1164.6	1.88009	7.64416	1
High	EKTPSPKEEDEEPEsPPEK	1	1	1	Q9H1E3	S15(Phospho)	0	T(3): 0.0; S(5): 0.0; S(15): 100.0	9.25989e+06	0	8.613e-05	18.03	0.478491	3	2261.97	0.944168	8.47853	2
High	TPSPKEEDEEPEsPPEKK	1	1	1	Q9H1E3	S13(Phospho)	0	T(1): 0.0; S(3): 0.0; S(13): 100.0	1.03147e+08	0	1.356e-06	23.79	0.14248	3	2132.93	1.40072	7.7168	2
High	KVVDYSQFQEsDDADEDYGR	2	1	1	Q9H1E3	S11(Phospho)	0	Y(5): 0.0; S(6): 0.0; S(11): 100.0; Y(18): 0.0	8.87112e+07	0	2.621e-12	81.47	1.86411e-07	2	2445.98	2.21597	18.098	1
High	VVDYSQFQEsDDADEDYGR	2	1	1	Q9H1E3	S10(Phospho)	0	Y(4): 0.0; S(5): 0.0; S(10): 100.0; Y(17): 0.0	3.7375e+08	0	5.89e-09	72.56	9.84461e-07	2	2317.88	1.60083	21.7871	0
High	SSsPAPADIAQTVQEDLR	5	1	1	Q13283	S3(Phospho)	0.0132	S(1): 0.0; S(2): 0.0; S(3): 100.0; T(12): 0.0	1.1321e+09	0	2.787e-10	74.63	1.06232e-06	2	1964.9	2.16597	28.3148	0
High	YQDEVFGGFVTEPQEEsEEEVEEPEER	2	1	1	Q13283	S17(Phospho)	0	Y(1): 0.0; T(11): 0.0; S(17): 100.0	5.19082e+08	0	3.626e-12	71.95	2.32647e-06	3	3296.34	1.4521	29.9479	0
High	SGsGNFGGGR	1	1	1	P09651	S3(Phospho)	0	S(1): 0.0; S(3): 100.0	4.1564e+06	0	1.614e-05	67.81	1.10109e-06	2	975.368	-0.0243439	6.61232	0
High	SEsPKEPEQLR	3	1	1	P09651	S3(Phospho)	0	S(1): 0.0; S(3): 100.0	4.34498e+08	0	0.001485	34.21	0.00781389	3	1379.62	0.259375	9.01557	1
High	SEsPKEPEQLRK	2	1	1	P09651	S3(Phospho)	0	S(1): 1.0; S(3): 99.0	1.20419e+08	0	1.225e-05	23.81	0.0856776	3	1507.72	-0.0455685	6.68832	2
High	NQGGYGGSSSsSSYGSGR	2	1	1	P09651	S11(Phospho)	0	Y(5): 0.0; S(8): 0.0; S(9): 0.0; S(10): 0.8; S(11): 98.3; S(12): 0.8; S(13): 0.0; Y(14): 0.0; S(16): 0.0	8.74198e+06	0	2.408e-12	97.92	2.2036e-09	2	1774.67	1.83304	8.71737	0
High	sSGPYGGGGQYFAK	2	2	1	P09651	S1(Phospho)	0	S(1): 50.0; S(2): 50.0; Y(5): 0.0; Y(11): 0.0	3945505	0	6.886e-06	40.21	0.00135297	2	1455.59	0.391449	17.3351	0
High	sKsEsPKEPEQLR	1	1	1	P09651	N-Term(Acetyl); S3(Phospho); S5(Phospho)	0	S(1): 0.0; S(3): 100.0; S(5): 100.0	3.38112e+07	0	0.0001078	47.99	0.000342332	2	1716.73	0.687993	12.8527	2
High	EAPAEGEAAEPGSPtAAEGEAASAASSTSSPK	6	1	1	P29966	T15(Phospho)	0	S(13): 50.0; T(15): 50.0; S(23): 0.0; S(26): 0.0; S(27): 0.0; T(28): 0.0; S(29): 0.0; S(30): 0.0	1.33296e+07	0	3.438e-10	40.64	0.00350801	3	2995.28	2.11346	19.125	0
High	AEDGATPSPSNEtPKK	2	1	1	P29966	T13(Phospho)	0	T(6): 0.0; S(8): 0.0; S(10): 98.9; T(13): 1.1	3.22807e+07	0	2.129e-05	13.54	1.17729	3	1708.74	0.616942	6.86003	1
High	LSGFsFK	1	1	1	P29966	S5(Phospho)	0	S(2): 0.0; S(5): 100.0	4.68093e+07	0.008	0.09407	34.65	0.00375331	2	865.385	-0.112886	22.5125	0
High	GEAAAERPGEAAVASsPSK	3	1	1	P29966	S16(Phospho)	0	S(15): 0.0; S(16): 99.3; S(18): 0.7	5.24995e+07	0	3.344e-16	92.85	1.69388e-08	2	1864.85	1.25728	9.03979	1
High	AEDGATPSPsNETPK	1	1	1	P29966	S10(Phospho)	0	T(6): 0.0; S(8): 0.0; S(10): 100.0; T(13): 0.0	5.70597e+07	0.001	0.008306	17.28	0.358236	2	1580.65	2.29678	9.57733	0
High	RPAPAVsPGSWKPGPPGsPR	1	1	1	Q96JM3	S7(Phospho); S18(Phospho)	0	S(7): 50.0; S(10): 50.0; S(18): 100.0	1.3723e+07	0	2.336e-06	31.7	0.0225136	3	2158	-0.0173443	18.0711	2
High	KPGPPLsPEIR	2	1	1	Q96JM3	S7(Phospho)	0	S(7): 100.0	1.58003e+07	0	1.572e-05	50.36	0.000153255	2	1270.66	1.13935	14.6801	1
High	ETDPVKsPPLPEHQK	1	1	1	Q96JM3	S7(Phospho)	0	T(2): 100.0; S(7): 0.0	5.69654e+06	0	0.0008013	19.04	0.33118	3	1781.85	0.12956	12.3392	1
High	AVPPVsPELR	2	1	1	Q96JM3	S6(Phospho)	0	S(6): 100.0	2.12581e+07	0	4.737e-05	57.42	4.03023e-05	2	1144.58	-0.0374167	19.3278	0
High	TAPTLsPEHWK	1	1	1	Q96JM3	S6(Phospho)	0	T(1): 0.0; T(4): 0.0; S(6): 100.0	0	0.003	0.03593	13.37	0.826161	2	1346.61	0.158257	16.0751	0
High	SSSVsPSSWK	1	1	1	Q96JM3	S5(Phospho)	0	S(1): 0.0; S(2): 0.0; S(3): 0.0; S(5): 99.2; S(7): 0.8; S(8): 0.0	2.03416e+06	0	0.0006645	50.79	0.00011088	2	1131.47	1.41759	14.6033	0
High	KPsPsESPEPWKPFPAVSPEPR	3	1	1	Q96JM3	S3(Phospho); S5(Phospho)	0	S(3): 99.0; S(5): 50.5; S(7): 50.5; S(18): 0.0	8474333	0	0.001523	12.97	1.92276	3	2606.17	-0.576489	24.1763	2
High	KPsGSPDLWKLsPDQR	2	1	1	Q96JM3	S3(Phospho); S12(Phospho)	0	S(3): 50.0; S(5): 50.0; S(12): 100.0	9.70541e+06	0	0.0001035	29.9	0.0287034	3	1970.88	1.07384	19.519	2
High	GGsPDLWK	1	1	1	Q96JM3	S3(Phospho)	0	S(3): 100.0	3.01911e+06	0	0.0009435	38.11	0.00134437	2	939.398	1.0194	17.7258	0
High	KTsPASLDFPESQK	1	1	1	Q96JM3	S3(Phospho)	0	T(2): 1.0; S(3): 99.0; S(6): 0.0; S(12): 0.0	18946102	0	2.078e-07	40.57	0.00236352	2	1614.74	1.64714	15.0985	1
High	KPsPSESPEPWKPFPAVSPEPR	3	1	1	Q96JM3	S3(Phospho)	0	S(3): 33.3; S(5): 33.3; S(7): 33.3; S(18): 0.0	1.07496e+07	0	9.905e-08	44.69	0.00113774	3	2526.21	1.92685	20.6108	2
High	KPGPSGPSEsPK	1	1	1	Q96JM3	S10(Phospho)	0	S(5): 0.0; S(8): 0.0; S(10): 100.0	1.48525e+07	0	2.966e-06	59.14	2.24294e-05	2	1247.57	1.07452	5.81102	1
High	sPPAsPESWK	1	1	1	Q96JM3	S1(Phospho); S5(Phospho)	0	S(1): 100.0; S(5): 100.0; S(8): 0.0	5.46228e+06	0.003	0.04288	16.86	0.16485	2	1245.46	0.193297	20.7067	0
High	cDILVQEELLAsPK	1	1	1	Q96JM3	C1(Carbamidomethyl); S12(Phospho)	0	S(12): 100.0	8.55866e+06	0	2.285e-05	26.1	0.0646816	2	1694.82	6.35608	28.5563	0
High	IMAtPEQVGK	1	1	1	P12956	T4(Phospho)	0	T(4): 100.0	2.39632e+06	0	2.266e-07	61.87	1.11497e-05	2	1153.53	0.990491	14.0798	0
High	ALEsPERPFLAILGGAK	1	1	1	P00558	S4(Phospho)	0	S(4): 100.0	1.09331e+07	0	0.001352	18.99	0.222082	2	1848.96	0.688026	30.2262	1
High	RAPsVANVGSHcDLSLK	1	1	1	P21333	S4(Phospho); C12(Carbamidomethyl)	0	S(4): 100.0; S(10): 0.0; S(15): 0.0	3.72022e+07	0	2.973e-10	33.02	0.0140685	3	1890.89	1.09696	14.2302	1
High	APsVANVGSHcDLSLK	2	1	1	P21333	S3(Phospho); C11(Carbamidomethyl)	0	S(3): 100.0; S(9): 0.0; S(14): 0.0	2.69169e+07	0	6.874e-12	100	2.785e-09	2	1734.79	0.631702	17.4759	0
High	FNEEHIPDSPFVVPVAsPSGDAR	1	1	1	P21333	S17(Phospho)	0	S(9): 0.0; S(17): 98.1; S(19): 1.9	5.96377e+06	0	0.0007083	13	1.72408	3	2547.16	0.273512	27.8219	0
High	AFGPGLQGGSAGsPAR	1	1	1	P21333	S13(Phospho)	0	S(10): 0.9; S(13): 99.1	1.30662e+07	0	1.257e-09	57.13	4.34727e-05	2	1509.68	-1.16804	17.2255	0
High	cSGPGLsPGmVR	1	1	1	P21333	C1(Carbamidomethyl); S7(Phospho); M10(Oxidation)	0	S(2): 0.0; S(7): 100.0	3.12773e+06	0.001	0.007876	28.56	0.0195042	2	1313.53	-2.39486	15.3709	0
High	PIPQtPESAGNK	1	1	1	P52948	T5(Phospho)	0	T(5): 100.0; S(8): 0.0	16167774	0	0.0004097	27.8	0.0373407	2	1318.61	1.66418	11.0179	0
High	NLNNSNLFsPVNR	1	1	1	P52948	S9(Phospho)	0	S(5): 0.0; S(9): 100.0	2.85766e+06	0	5.202e-05	52.04	0.00014629	2	1568.72	1.92943	23.0544	0
High	PAPPPQsQSPEVEQLGR	2	1	1	P52948	S7(Phospho)	0	S(7): 50.0; S(9): 50.0	1.1353e+07	0	8.078e-07	18.49	0.402085	3	1896.89	1.48261	17.6059	0
High	DSENLAsPSEYPENGER	1	1	1	P52948	S7(Phospho)	0	S(2): 0.0; S(7): 100.0; S(9): 0.0; Y(11): 0.0	9.22851e+06	0	1.267e-12	75.11	6.59802e-07	2	1973.78	1.39017	18.3787	0
High	YGLQDsDEEEEEHPSK	2	1	1	P52948	S6(Phospho)	0	Y(1): 0.0; S(6): 100.0; S(15): 0.0	4.69546e+07	0	7.954e-12	85.21	4.57977e-08	2	1971.75	1.59484	11.7704	0
High	ADTSQEIcsPR	1	1	1	P52948	C8(Carbamidomethyl); S9(Phospho)	0	T(3): 0.0; S(4): 0.0; S(9): 100.0	3.48201e+06	0	2.274e-05	42.18	0.00080813	2	1343.53	-1.68428	10.449	0
High	TLNAEtPKSsPLPAK	2	1	1	Q7L2J0	T6(Phospho); S10(Phospho)	0	T(1): 0.0; T(6): 100.0; S(9): 1.0; S(10): 99.0	2.27505e+07	0	1.904e-06	25.51	0.072547	2	1713.79	1.48123	14.7779	1
High	RNscNVGGGGGGFK	1	1	1	Q7L2J0	S3(Phospho); C4(Carbamidomethyl)	0	S(3): 100.0	1.13156e+07	0	1.474e-14	84.07	6.09159e-08	2	1446.6	0.719125	6.98669	1
High	EsPGAAATSSSGPQAQQHR	2	1	1	Q7L2J0	S2(Phospho)	0	S(2): 100.0; T(8): 0.0; S(9): 0.0; S(10): 0.0; S(11): 0.0	5.3859e+06	0	2.969e-14	79.74	2.65424e-07	3	1946.84	2.19352	7.65596	0
High	cAPSAGsPAAAVGR	1	1	1	Q7L2J0	C1(Carbamidomethyl); S7(Phospho)	0	S(4): 0.0; S(7): 100.0	5.61313e+06	0	8.636e-08	54.8	6.27493e-05	2	1351.58	0.315956	12.9975	0
High	RStQGVTLTDLQEAEK	3	1	1	O14974	T3(Phospho)	0	S(2): 0.0; T(3): 100.0; T(7): 0.0; T(9): 0.0	1.40198e+07	0	1.527e-08	45.38	0.000899625	3	1855.88	0.36316	17.6224	1
High	RLAsTSDIEEK	1	1	1	O14974	S4(Phospho)	0	S(4): 98.3; T(5): 0.8; S(6): 0.8	8.67215e+06	0	0.002644	32.01	0.0124327	2	1328.61	0.834655	9.91858	1
High	LAsTSDIEEK	1	1	1	O14974	S3(Phospho)	0	S(3): 100.0; T(4): 0.0; S(5): 0.0	1.15615e+07	0	1.892e-07	78.26	2.09738e-07	2	1172.51	-1.61794	13.1108	0
High	SGsYSYLEER	1	1	1	O14974	S3(Phospho)	0	S(1): 0.0; S(3): 100.0; Y(4): 0.0; S(5): 0.0; Y(6): 0.0	7.69499e+06	0	1.803e-05	57.75	1.93062e-05	2	1270.5	0.339084	16.9211	0
High	TGsYGALAEITASK	1	1	1	O14974	S3(Phospho)	0	T(1): 0.0; S(3): 100.0; Y(4): 0.0; T(11): 0.0; S(13): 0.0	1.59642e+07	0	3.797e-09	75.75	6.9711e-07	2	1448.67	-0.424484	24.0342	0
High	TQtPPVsPAPQPTEER	2	1	1	Q14247	T3(Phospho); S7(Phospho)	0	T(1): 0.0; T(3): 100.0; S(7): 100.0; T(13): 0.0	3.77481e+07	0	1.935e-06	51.65	0.000168926	2	1894.8	0.936878	18.3746	0
High	TQtPPVSPAPQPTEER	2	1	1	Q14247	T3(Phospho)	0	T(1): 0.0; T(3): 100.0; S(7): 0.0; T(13): 0.0	5.65496e+07	0	1.062e-07	68.46	4.03447e-06	2	1814.83	0.654193	15.8709	0
High	LPSsPVYEDAASFK	1	1	1	Q14247	S4(Phospho)	0	S(3): 0.0; S(4): 100.0; Y(7): 0.0; S(12): 0.0	1.9576e+08	0	6.103e-08	71.78	1.8618e-06	2	1590.71	2.06916	23.328	0
High	SGAHSSAsPPR	1	1	1	P18615	S8(Phospho)	0	S(1): 0.0; S(5): 0.0; S(6): 50.0; S(8): 50.0	8.03848e+06	0	0.0004275	41.06	0.00109288	2	1133.48	1.49542	1.89055	0
High	SLsEQPVmDTATATEQAK	1	1	1	P18615	S3(Phospho); M8(Oxidation)	0	S(1): 1.1; S(3): 98.9; T(10): 0.0; T(12): 0.0; T(14): 0.0	5.96215e+06	0	5.85e-05	31.55	0.0206453	2	2002.87	0.250786	16.6472	0
High	SIsADDDLQESSR	1	1	1	P18615	S3(Phospho)	0	S(1): 0.0; S(3): 100.0; S(11): 0.0; S(12): 0.0	2.45342e+07	0	8.612e-10	89.28	1.62294e-08	2	1502.6	0.522912	14.6094	0
High	SLsEQPVMDTATATEQAK	2	1	1	P18615	S3(Phospho)	0	S(1): 0.7; S(3): 99.3; T(10): 0.0; T(12): 0.0; T(14): 0.0	1.4899e+07	0	9.273e-14	74.66	1.02081e-06	2	1986.88	1.50269	20.422	0
High	sLYESFVSSSDR	1	1	1	P18615	S1(Phospho)	0	S(1): 100.0; Y(3): 0.0; S(5): 0.0; S(8): 0.0; S(9): 0.0; S(10): 0.0	2.29266e+06	0	4.737e-06	44.73	0.000605721	2	1456.6	0.382222	23.5317	0
High	LPNTYPNSsSPGPGGLGGSVHYATMAR	2	1	1	Q96N67	S9(Phospho)	0	T(4): 0.0; Y(5): 0.0; S(8): 33.3; S(9): 33.3; S(10): 33.3; S(19): 0.0; Y(22): 0.0; T(24): 0.0	5.45204e+06	0	7.392e-06	19	0.526231	3	2768.24	-2.16082	21.7261	0
High	TTsGDDAcNLTSFR	1	1	1	Q96N67	S3(Phospho); C8(Carbamidomethyl)	0	T(1): 0.0; T(2): 0.0; S(3): 100.0; T(11): 0.0; S(12): 0.0	1.5278e+07	0	1.482e-09	111.41	1.095e-10	2	1624.63	-1.60825	19.6859	0
High	RNsSIVGR	1	1	1	Q96N67	S3(Phospho)	0	S(3): 100.0; S(4): 0.0	2.8445e+06	0.003	0.03676	40.59	0.0013662	2	968.468	0.599717	5.81274	1
High	SNsWVNTGGPK	1	1	1	Q96N67	S3(Phospho)	0	S(1): 0.0; S(3): 100.0; T(7): 0.0	3.5663e+06	0	0.0001755	33.49	0.00792453	2	1226.52	-0.699208	14.3449	0
High	SPsGSAFGSQENLR	1	1	1	Q96N67	S3(Phospho)	0	S(1): 0.0; S(3): 100.0; S(5): 0.0; S(9): 0.0	1.31827e+07	0	6.702e-10	72.52	1.07473e-06	2	1516.64	0.501097	16.0548	0
High	smSIDDTPR	1	1	1	Q96N67	S1(Phospho); M2(Oxidation)	0	S(1): 100.0; S(3): 0.0; T(7): 0.0	1.88198e+06	0	0.0001115	39.38	0.000778581	2	1117.42	-0.476346	11.0386	0
High	KEESEEsDDDMGFGLFD	1	2	2	P05387;P05386	S7(Phospho)	0	S(4): 0.7; S(7): 99.3	1.7387e+08	0	1.459e-05	67.39	2.31635e-06	2	2029.73	2.40727	32.8719	1
High	KEEsEEsDDDmGFGLFD	2	2	2	P05387;P05386	S4(Phospho); S7(Phospho); M11(Oxidation)	0	S(4): 100.0; S(7): 100.0	2.69536e+09	0	1.166e-09	63.06	2.34798e-06	2	2125.69	0.143557	37.6655	1
High	KEEsEEsDDDMGFGLFD	4	2	2	P05387;P05386	S4(Phospho); S7(Phospho)	0	S(4): 100.0; S(7): 100.0	1.42759e+09	0	2.227e-06	51.47	5.16818e-05	2	2109.69	1.09032	42.3999	1
High	KEEsEESDDDmGFGLFD	2	2	2	P05387;P05386	S4(Phospho); M11(Oxidation)	0	S(4): 100.0; S(7): 0.0	1.16157e+08	0.001	0.003375	24.12	0.0356277	2	2045.72	1.77124	29.4904	1
High	SSLsGDEEDELFK	1	1	1	Q5T1M5	S4(Phospho)	0	S(1): 0.0; S(2): 0.0; S(4): 100.0	1.18171e+07	0	1.902e-08	83.21	8.18963e-08	2	1535.62	0.208173	23.9123	0
High	SNsLSEQLAINTSPDAVK	2	1	1	Q5T1M5	S3(Phospho)	0	S(1): 0.9; S(3): 99.1; S(5): 0.0; T(12): 0.0; S(13): 0.0	8.51837e+06	0	2.428e-14	100.77	2.52515e-09	2	1953.92	1.23885	24.1984	0
High	RPsQEQSASASSGQPQAPLNR	2	1	1	Q5T1M5	S3(Phospho)	0	S(3): 100.0; S(7): 0.0; S(9): 0.0; S(11): 0.0; S(12): 0.0	2.86548e+07	0	5.713e-10	69.54	3.9133e-06	3	2276.04	0.955192	10.4976	1
High	QLPALDGsLMGPESPPAQEEEAPVSPHK	1	1	1	Q8N9T8	S8(Phospho)	0	S(8): 2.3; S(14): 97.7; S(25): 0.0	7.91717e+06	0	1.306e-06	19.6	0.439688	3	2991.38	0.227155	26.0211	0
High	YVDEENsDGETSNHR	1	1	1	Q8N9T8	S7(Phospho)	0	Y(1): 0.0; S(7): 100.0; T(11): 0.0; S(12): 0.0	7.34609e+06	0	2.508e-09	91.2	1.21372e-08	2	1831.68	2.11679	6.62974	0
High	AFVEDsEDEDGAGEGGSSLLQK	2	1	1	Q8N9T8	S6(Phospho)	0	S(6): 100.0; S(17): 0.0; S(18): 0.0	4.31124e+07	0	8.692e-13	118.63	3.83161e-11	2	2319.95	1.82374	23.3501	0
High	ASLVALPEQtASEEETPPPLLTK	3	1	1	Q9UKV3	T10(Phospho)	0	S(2): 1.1; T(10): 48.9; S(12): 48.9; T(16): 1.1; T(22): 0.0	1.81014e+07	0	3.171e-05	13.66	1.08493	3	2501.24	-0.617476	31.126	0
High	LQPERGsPK	1	1	1	Q9UKV3	S7(Phospho)	0	S(7): 100.0	3.93701e+07	0.009	0.1034	31.21	0.0149853	2	1091.53	0.811638	5.21307	1
High	GVPAGNsDTEGGQPGR	1	1	1	Q9UKV3	S7(Phospho)	0	S(7): 100.0; T(9): 0.0	3071524	0	0.0002996	30.47	0.0179934	2	1578.66	4.77785	9.91661	0
High	TAQVPsPPR	1	1	1	Q9UKV3	S6(Phospho)	0	T(1): 0.0; S(6): 100.0	1.11359e+08	0	0.0006601	38.56	0.00257037	2	1032.49	0.51365	13.0318	0
High	RLsQPESAEK	1	1	1	Q9UKV3	S3(Phospho)	0	S(3): 100.0; S(7): 0.0	6.00942e+07	0	5.76e-05	66.28	4.58057e-06	2	1224.56	-0.10212	6.28118	1
High	AEsPAEKVPEESVLPLVQK	1	1	1	Q9UKV3	S3(Phospho)	0	S(3): 100.0; S(12): 0.0	3.17234e+07	0	5.095e-10	39.34	0.00261928	3	2130.08	2.88979	23.7001	1
High	LsEGSQPAEEEEDQETPSR	2	1	1	Q9UKV3	S2(Phospho)	0	S(2): 50.0; S(5): 50.0; T(16): 0.0; S(18): 0.0	2.66155e+06	0	0.001622	24.11	0.085199	2	2197.88	2.12345	13.6129	0
High	SSSISEEKGDsDDEKPR	2	1	1	Q9UKV3	S11(Phospho)	0	S(1): 0.0; S(2): 0.0; S(3): 0.0; S(5): 0.0; S(11): 100.0	3.96916e+07	0	5.941e-10	48.81	0.000336698	3	1945.81	1.66196	6.09464	2
High	PLPPAAIEsPAVAAPAYSR	1	1	1	P04792	S9(Phospho)	0	S(9): 100.0; Y(17): 0.0; S(18): 0.0	1.32537e+07	0	3.666e-05	20.86	0.197705	3	1957.98	0.667599	25.6267	0
High	QLsSGVSEIR	6	1	1	P04792	S3(Phospho)	0	S(3): 100.0; S(4): 0.0; S(7): 0.0	6.2998e+08	0	0.0003988	48.65	0.00028588	2	1155.54	-0.0150211	16.2657	0
High	sGEDEQQEQTIAEDLVVTK	2	1	1	Q9UQ80	N-Term(Acetyl); S1(Phospho)	0	S(1): 100.0; T(10): 0.0; T(18): 0.0	7.72964e+07	0	1.464e-06	68.11	5.6479e-06	3	2240.98	0.753104	34.1385	0
High	LAEDEGDsEPEAVGQSR	1	1	1	Q9UIG0	S8(Phospho)	0	S(8): 100.0; S(16): 0.0	3.32339e+07	0	1.695e-11	118.46	3.19336e-11	2	1868.76	1.64052	14.074	0
High	DHTVsGDEDYcPR	1	1	1	Q9UIG0	S5(Phospho); C11(Carbamidomethyl)	0	T(3): 0.0; S(5): 100.0; Y(10): 0.0	6.38575e+06	0	8.643e-07	64.47	2.89391e-06	2	1630.59	1.96831	11.5155	0
High	SLSGsPLK	1	1	1	Q9UIG0	S5(Phospho)	0	S(1): 0.0; S(3): 0.0; S(5): 100.0	3.86331e+06	0.001	0.008295	34.2	0.00488543	2	868.417	-0.448412	12.0198	0
High	RQsLELQK	1	1	1	Q9UIG0	S3(Phospho)	0	S(3): 100.0	3.22571e+06	0.003	0.04795	34.08	0.00840308	2	1081.54	-0.549143	8.13041	1
High	KSDGAcDsPSSDKENSSQIAQDHQK	1	1	1	Q9UIG0	C6(Carbamidomethyl); S8(Phospho)	0	S(2): 0.0; S(8): 33.0; S(10): 0.5; S(11): 0.5; S(16): 33.0; S(17): 33.0	4.09752e+06	0	2.026e-05	34.87	0.0106549	4	2799.16	1.75876	6.32684	2
High	LITSEEERsPAK	1	1	1	Q12888	S9(Phospho)	0	T(3): 0.0; S(4): 0.0; S(9): 100.0	6.37012e+06	0.002	0.03086	24.81	0.0817665	2	1439.68	1.32168	8.24108	1
High	STPFIVPsSPTEQEGR	2	1	1	Q12888	S8(Phospho)	0	S(1): 0.0; T(2): 0.0; S(8): 49.6; S(9): 49.6; T(11): 0.7	6.09261e+06	0.001	0.009542	13.59	1.24913	2	1811.82	-0.807229	23.7947	0
High	GNLLHFPsSQGEEEKEK	1	1	1	Q12888	S8(Phospho)	0	S(8): 98.9; S(9): 1.1	7.17442e+06	0	6.318e-05	30.78	0.0232298	3	2008.9	0.221124	14.8096	1
High	SEDMPFsPK	1	1	1	Q12888	S7(Phospho)	0	S(1): 0.0; S(7): 100.0	7.00242e+06	0	0.0003217	42.26	0.000436805	2	1117.43	0.61905	19.3484	0
High	MVIQGPsSPQGEAMVTDVLEDQK	4	1	1	Q12888	S7(Phospho)	0	S(7): 50.0; S(8): 50.0; T(16): 0.0	1.78115e+07	0	1.564e-05	18.39	0.59617	3	2539.15	2.35678	30.5052	0
High	NsPEDLGLSLTGDScK	1	1	1	Q12888	S2(Phospho); C15(Carbamidomethyl)	0	S(2): 100.0; S(9): 0.0; T(11): 0.0; S(14): 0.0	1.78543e+07	0	1.353e-11	69.06	3.12276e-06	2	1772.74	0.537353	25.3303	0
High	IDEDGENTQIEDTEPMsPVLNSK	2	1	1	Q12888	S17(Phospho)	0	T(8): 0.0; T(13): 0.0; S(17): 100.0; S(22): 0.0	1.40918e+07	0	0.0002709	16.92	0.7286	3	2641.13	1.32381	25.0414	0
High	QSQQPMKPIsPVKDPVsPASQK	1	1	1	Q12888	S10(Phospho); S17(Phospho)	0	S(2): 0.1; S(10): 99.9; S(17): 97.6; S(20): 2.4	1.43245e+07	0	0.0008494	18.1	0.544409	3	2537.19	2.01467	16.6132	2
High	sPEPEVLSTQEDLFDQSNK	1	1	1	Q12888	S1(Phospho)	0	S(1): 100.0; S(8): 0.0; T(9): 0.0; S(17): 0.0	1.23136e+07	0	1.25e-09	69.14	4.00438e-06	2	2242.98	1.7072	27.8432	0
High	QSQQPmKPIsPVKDPVsPASQK	1	1	1	Q12888	M6(Oxidation); S10(Phospho); S17(Phospho)	0	S(2): 0.0; S(10): 100.0; S(17): 97.5; S(20): 2.5	7.16921e+06	0.001	0.004328	13.45	1.57472	3	2553.19	1.67484	14.1757	2
High	SEDmPFsPK	1	1	1	Q12888	M4(Oxidation); S7(Phospho)	0	S(1): 0.0; S(7): 100.0	2.93406e+06	0	0.001117	39.52	0.000882322	2	1133.42	0.465599	14.2895	0
High	mVIQGPsSPQGEAMVTDVLEDQK	2	1	1	Q12888	M1(Oxidation); S7(Phospho)	0	S(7): 50.0; S(8): 50.0; T(16): 0.0	7.87481e+06	0	9.751e-05	15.02	1.19142	3	2555.14	1.08348	28.8107	0
High	SSTPLHsPSPIR	1	1	1	O95817	S7(Phospho)	0	S(1): 0.0; S(2): 0.0; T(3): 0.0; S(7): 100.0; S(9): 0.0	1.22279e+07	0	2.59e-05	54.77	7.86886e-05	2	1358.65	-0.121052	12.2961	0
High	SQsPAASDcSSSSSSASLPSSGR	3	1	1	O95817	S3(Phospho); C9(Carbamidomethyl)	0	S(1): 0.0; S(3): 100.0; S(7): 0.0; S(10): 0.0; S(11): 0.0; S(12): 0.0; S(13): 0.0; S(14): 0.0; S(15): 0.0; S(17): 0.0; S(20): 0.0; S(21): 0.0	3.06477e+07	0	4.335e-15	122.53	1.34591e-11	2	2279.91	2.13045	12.8503	0
High	VPPAPVPcPPPSPGPSAVPSsPK	3	1	1	O95817	C8(Carbamidomethyl); S21(Phospho)	0	S(12): 0.0; S(16): 0.0; S(20): 1.1; S(21): 98.9	5.4631e+07	0	7.047e-10	43.63	0.00126585	3	2299.13	3.31908	23.8858	0
High	SEEVPAFGVASPPPLtDTPDTTANAEGDLPTTMGGPLPPHLALK	5	1	1	Q08211	T16(Phospho)	0	S(1): 0.0; S(11): 19.7; T(16): 19.7; T(18): 19.7; T(21): 19.7; T(22): 19.7; T(31): 0.8; T(32): 0.8	394989	0	0.0001498	15.44	0.857277	4	4489.15	-0.0655035	35.109	0
High	RYPSSISSsPQK	2	1	1	Q14157	S9(Phospho)	0	Y(2): 0.0; S(4): 0.0; S(5): 0.0; S(7): 0.0; S(8): 0.0; S(9): 100.0	7.23595e+07	0	2.22e-05	48.92	0.000282754	2	1416.65	1.02044	8.25622	1
High	YPSSISSsPQK	1	1	1	Q14157	S8(Phospho)	0	Y(1): 0.0; S(3): 0.0; S(4): 0.0; S(6): 0.0; S(7): 0.0; S(8): 100.0	3.08522e+07	0	9.46e-06	50.47	0.000157947	2	1260.55	0.0210612	11.857	0
High	RYPSSISsSPQKDLTQAK	2	1	1	Q14157	S8(Phospho)	0	Y(2): 0.0; S(4): 0.0; S(5): 0.0; S(7): 1.0; S(8): 49.5; S(9): 49.5; T(15): 0.0	7.45987e+06	0	2.261e-05	15.57	0.80149	3	2073	-0.106392	12.8338	2
High	YPSsISSSPQKDLTQAK	10	1	1	Q14157	S4(Phospho)	0	Y(1): 0.0; S(3): 50.0; S(4): 50.0; S(6): 0.0; S(7): 0.0; S(8): 0.0; T(14): 0.0	4.98036e+06	0	2.518e-06	29.31	0.0349314	2	1916.9	0.648174	15.4837	1
High	YPsSISsSPQKDLTQAK	10	1	1	Q14157	S3(Phospho); S7(Phospho)	0	Y(1): 33.3; S(3): 33.3; S(4): 33.3; S(6): 33.3; S(7): 33.3; S(8): 33.3; T(14): 0.0	4.08561e+06	0.001	0.0184	14.28	1.08243	2	1996.87	4.15657	18.8427	1
High	STsAPQmSPGSSDNQSSSPQPAQQK	3	1	1	Q14157	S3(Phospho); M7(Oxidation)	0	S(1): 2.3; T(2): 2.3; S(3): 95.3; S(8): 0.1; S(11): 0.1; S(12): 0.1; S(16): 0.0; S(17): 0.0; S(18): 0.0	1.38157e+07	0	9.851e-06	28.36	0.0473385	3	2628.09	-0.139517	9.44894	0
High	STSAPQMSPGSSDNQSSsPQPAQQK	2	1	1	Q14157	S18(Phospho)	0.0345	S(1): 0.0; T(2): 0.0; S(3): 0.0; S(8): 0.0; S(11): 0.0; S(12): 0.0; S(16): 0.0; S(17): 1.9; S(18): 98.1	8.74947e+06	0	4.765e-08	28.08	0.0501021	3	2612.09	0.529948	12.442	0
High	SPAVATSTAAPPPPSsPLPSK	5	1	1	Q14157	S16(Phospho)	0	S(1): 0.0; T(6): 0.0; S(7): 0.0; T(8): 0.0; S(15): 1.1; S(16): 97.9; S(20): 1.1	8.91064e+07	0	3.461e-09	53.13	0.000130114	2	2040.01	1.57549	19.259	0
High	AFAAVPTSHPPEDAPAQPPtPGPAASPEQLSFR	1	1	1	Q14160	T20(Phospho)	0	T(7): 0.0; S(8): 0.0; T(20): 100.0; S(26): 0.0; S(31): 0.0	3.51296e+07	0	8.939e-06	10.63	3.3085	3	3418.61	-0.8463	25.3414	0
High	LAEAPSPAPTPSPtPVEDLGPQTSTSPGRLSPDFAEELR	9	1	1	Q14160	T14(Phospho)	0	S(6): 0.4; T(10): 12.5; S(12): 12.5; T(14): 12.5; T(23): 12.5; S(24): 12.5; T(25): 12.5; S(26): 12.5; S(31): 12.5	1.92943e+07	0	2.307e-05	15.33	0.735654	3	4095	9.13581	29.1396	1
High	LPLLPPEsPGPLR	1	1	1	Q14160	S8(Phospho)	0	S(8): 100.0	1.96332e+07	0	0.001361	23.82	0.0636954	2	1465.78	0.929341	29.2924	0
High	QSPAsPPPLGGGAPVR	1	1	1	Q14160	S5(Phospho)	0	S(2): 0.0; S(5): 100.0	1.15773e+07	0	3.334e-06	62.26	1.33121e-05	2	1567.77	3.31153	19.6825	0
High	SLEPsPSPGPQEEDGEVALVLLGR	2	1	1	Q14160	S5(Phospho)	0	S(1): 0.0; S(5): 50.0; S(7): 50.0	6.90629e+06	0	6.658e-06	16.68	0.661532	3	2556.23	2.20229	35.5192	0
High	MKsLEQDALR	1	1	1	Q14160	S3(Phospho)	0	S(3): 100.0	6.07816e+06	0	3.289e-05	53.09	9.91634e-05	2	1270.59	6.85815	13.0896	1
High	RVsLVGADDLR	1	1	1	Q14160	S3(Phospho)	0	S(3): 100.0	6.56372e+06	0	4.815e-06	47.59	0.000438064	2	1280.64	0.380934	16.9583	1
High	VQsPEPPAPER	1	1	1	Q14160	S3(Phospho)	0	S(3): 100.0	1.0293e+07	0	4.319e-05	49.8	0.000212044	2	1286.58	0.729516	12.0266	0
High	MVEPENAVTITPLRPEDDYsPR	1	1	1	Q14160	S20(Phospho)	0	T(9): 0.0; T(11): 0.0; Y(19): 99.0; S(20): 1.0	1.25184e+07	0	9.348e-05	25.6	0.105625	3	2609.2	3.56958	24.659	1
High	LsPDFAEELR	1	1	1	Q14160	S2(Phospho)	0	S(2): 100.0	1.90871e+06	0	4.188e-05	27.8	0.0336066	2	1256.56	0.123808	25.7054	0
High	mKsLEQDALR	1	1	1	Q14160	M1(Oxidation); S3(Phospho)	0	S(3): 100.0	6.04864e+06	0	4.9e-05	57.08	4.0744e-05	2	1286.58	0.952671	10.5177	1
High	mVEPENAVTITPLRPEDDYsPR	1	1	1	Q14160	M1(Oxidation); S20(Phospho)	0	T(9): 0.0; T(11): 0.0; Y(19): 1.3; S(20): 98.7	6.71874e+06	0	0.001555	22.16	0.232612	3	2625.19	0.648887	23.4884	1
High	RSEAcPcQPDsGSPLPAEEEK	2	1	1	Q14160	C5(Carbamidomethyl); C7(Carbamidomethyl); S11(Phospho)	0	S(2): 0.0; S(11): 50.0; S(13): 50.0	5.41007e+06	0	2.095e-08	30.82	0.0218991	3	2423.98	-3.03855	12.7847	1
High	IESDVQEPtEPEDDLDIMLGNK	3	1	1	P20042	T9(Phospho)	0	S(3): 0.0; T(9): 100.0	1.83133e+07	0	2.002e-06	31.77	0.0236172	2	2567.12	3.37346	31.7773	0
High	sGDEmIFDPTmSK	1	1	1	P20042	S1(Phospho); M5(Oxidation); M11(Oxidation)	0	S(1): 100.0; T(10): 0.0; S(12): 0.0	3.80318e+06	0	0.0004691	25.98	0.02902	2	1569.59	0.431061	21.2158	0
High	sGDEMIFDPTMSK	1	1	1	P20042	S1(Phospho)	0	S(1): 100.0; T(10): 0.0; S(12): 0.0	4.19742e+06	0	0.0009116	14.9	0.448177	2	1537.59	-0.140524	27.2174	0
High	sGDEmIFDPTmSK	1	1	1	P20042	N-Term(Acetyl); S1(Phospho); M5(Oxidation); M11(Oxidation)	0	S(1): 100.0; T(10): 0.0; S(12): 0.0	5.53782e+07	0	0.001523	31.24	0.00699009	2	1611.6	0.605515	29.2593	0
High	sGDEMIFDPTmSK	2	1	1	P20042	N-Term(Acetyl); S1(Phospho); M11(Oxidation)	0	S(1): 100.0; T(10): 0.0; S(12): 0.0	4.13693e+07	0	7.674e-05	34.05	0.00464389	2	1595.6	0.637878	33.9677	0
High	sGDEMIFDPTMSK	2	1	1	P20042	N-Term(Acetyl); S1(Phospho)	0	S(1): 100.0; T(10): 0.0; S(12): 0.0	6.58043e+07	0	7.762e-05	40.53	0.00115508	2	1579.61	1.21185	36.7939	0
High	IMNTFSVVPsPK	1	4	1	P07437	S10(Phospho)	0	T(4): 0.0; S(6): 0.0; S(10): 100.0	3.07986e+06	0	0.00011	19.38	0.261257	2	1399.67	1.60896	25.4979	0
High	IILDLISEsPIK	1	1	1	P61978	S9(Phospho)	0	S(7): 0.0; S(9): 100.0	1.28687e+07	0	0.0001959	34.86	0.00470286	2	1420.77	-0.169894	32.5761	0
High	IILDLISEsPIKGR	1	1	1	P61978	S9(Phospho)	0	S(7): 0.0; S(9): 100.0	2.0508e+06	0.002	0.01948	10.17	1.29337	2	1633.89	-0.0922441	26.9657	1
High	DYDDMsPR	1	1	1	P61978	S6(Phospho)	0	Y(2): 0.0; S(6): 100.0	5.15247e+07	0.001	0.01388	34.91	0.00145282	2	1078.36	0.472857	13.6521	0
High	GsYGDLGGPIITTQVTIPK	1	1	1	P61978	S2(Phospho)	0	S(2): 50.0; Y(3): 50.0; T(12): 0.0; T(13): 0.0; T(16): 0.0	1.8821e+07	0	2.63e-10	57.81	3.99868e-05	2	1997	-0.972619	30.5549	0
High	DYDDmsPR	1	1	1	P61978	M5(Oxidation); S6(Phospho)	0	Y(2): 0.0; S(6): 100.0	2.16846e+07	0.002	0.01869	26.88	0.00543558	2	1094.35	-0.0185738	8.79119	0
High	AsGEmASAQYITAALR	1	1	1	P54578	S2(Phospho); M5(Oxidation)	0	S(2): 100.0; S(7): 0.0; Y(10): 0.0; T(12): 0.0	3.33585e+08	0	2.002e-07	66.33	7.26364e-06	2	1735.77	0.835287	25.0397	0
High	AsGEMASAQYITAALR	1	1	1	P54578	S2(Phospho)	0	S(2): 100.0; S(7): 0.0; Y(10): 0.0; T(12): 0.0	2.47759e+07	0	1.803e-12	94.64	9.44784e-09	2	1719.78	0.0156872	27.7614	0
High	LDNTPAsPPRsPAEPNDIPIAK	1	1	1	O95359	S7(Phospho); S11(Phospho)	0	T(4): 0.0; S(7): 100.0; S(11): 100.0	6.34466e+07	0	4.177e-06	19.44	0.391344	3	2460.12	0.570813	22.8231	1
High	LDNTPAsPPR	1	1	1	O95359	S7(Phospho)	0	T(4): 0.0; S(7): 100.0	6.93995e+06	0	3.546e-05	49.3	0.000217356	2	1147.51	-1.10951	12.2028	0
High	QQDTPGsPDHR	1	1	1	O95359	S7(Phospho)	0	T(4): 0.0; S(7): 100.0	1.01848e+06	0.001	0.007319	17.11	0.274296	2	1317.52	-1.63892	5.46939	0
High	LDNTPAsPPRSPAEPNDIPIAK	2	1	1	O95359	S7(Phospho)	0	T(4): 0.0; S(7): 98.1; S(11): 1.9	1.48528e+07	0	6.675e-06	11.17	2.20749	3	2380.16	0.419901	20.1954	1
High	VQNsPPVGR	1	1	1	O95359	S4(Phospho)	0	S(4): 100.0	4.20337e+07	0.003	0.03765	33.37	0.00694987	2	1033.48	0.502762	8.84372	0
High	RKsTDSVPISK	1	1	1	O95359	S3(Phospho)	0	S(3): 50.0; T(4): 50.0; S(6): 0.0; S(10): 0.0	9.12976e+06	0	0.0002664	38.27	0.00286702	3	1297.65	0.427889	6.12087	2
High	FSsPTEELDYR	1	1	1	O95359	S3(Phospho)	0	S(2): 0.0; S(3): 100.0; T(5): 0.0; Y(10): 0.0	8.68686e+06	0	6.943e-08	73.27	7.25305e-07	2	1423.58	0.459714	20.4357	0
High	sTDSVPISK	1	1	1	O95359	S1(Phospho)	0	S(1): 99.1; T(2): 0.9; S(4): 0.0; S(8): 0.0	4.46364e+06	0	4.754e-05	52.82	8.01878e-05	2	1013.45	-0.297746	12.6594	0
High	sSDSEEAFETPESTTPVK	2	1	1	O95359	S1(Phospho)	0	S(1): 49.7; S(2): 49.7; S(4): 0.7; T(10): 0.0; S(13): 0.0; T(14): 0.0; T(15): 0.0	1.91836e+07	0	1.328e-07	48.49	0.000312183	2	2020.83	1.04855	20.1449	0
High	msESPTPcSGSSFEETEALVNTAAK	3	1	1	O95359	M1(Oxidation); S2(Phospho); C8(Carbamidomethyl)	0	S(2): 32.3; S(4): 32.3; T(6): 32.3; S(9): 0.8; S(11): 0.8; S(12): 0.8; T(16): 0.8; T(22): 0.0	8.15516e+06	0	0.0001355	28.27	0.046617	3	2726.12	-1.18862	26.1122	0
High	STcAPsPQR	1	1	1	O95359	C3(Carbamidomethyl); S6(Phospho)	0	S(1): 0.0; T(2): 0.0; S(6): 100.0	2.56184e+06	0.001	0.01394	21.02	0.08737	2	1083.43	0.859187	6.69558	0
High	RNsSEASSGDFLDLK	3	1	1	Q9UK76	S3(Phospho)	0	S(3): 50.0; S(4): 50.0; S(7): 0.0; S(8): 0.0	4.90704e+08	0	6.592e-10	71.19	1.859e-06	2	1705.74	1.14809	19.0192	1
High	NsSEASSGDFLDLK	1	1	1	Q9UK76	S2(Phospho)	0	S(2): 100.0; S(3): 0.0; S(6): 0.0; S(7): 0.0	1.14293e+07	0	9.692e-10	98.42	2.76249e-09	2	1549.64	-1.30623	24.8829	0
High	RSAsPDDDLGSSNWEAADLGNEER	4	1	1	O00193	S4(Phospho)	0	S(2): 50.0; S(4): 50.0; S(11): 0.0; S(12): 0.0	7.6461e+06	0	8.161e-08	43.26	0.00142091	3	2671.1	2.20373	21.1633	1
High	SAsPDDDLGSSNWEAADLGNEER	3	1	1	O00193	S3(Phospho)	0	S(1): 1.0; S(3): 99.0; S(10): 0.0; S(11): 0.0	8.86389e+07	0	6.422e-17	107.99	3.91577e-10	2	2514.99	2.19418	25.424	0
High	GLQLtPGIGGmQQHFFDDEDR	1	1	1	P12270	T5(Phospho); M11(Oxidation)	0	T(5): 100.0	7.1094e+06	0	0.0003215	15	1.09731	3	2457.06	1.93149	25.8863	0
High	TVPStPTLVVPHR	3	1	1	P12270	T5(Phospho)	0.05	T(1): 0.0; S(4): 0.0; T(5): 100.0; T(7): 0.0	3.45283e+07	0	8.996e-07	57.35	3.8196e-05	2	1483.77	1.05671	18.4168	0
High	EGVQGPLNVsLSEEGK	1	1	1	P12270	S10(Phospho)	0	S(10): 98.9; S(12): 1.1	4.99138e+06	0	4.682e-09	73	1.36323e-06	2	1722.8	0.810198	23.9602	0
High	TDGFAEAIHsPQVAGVPR	2	1	1	P12270	S10(Phospho)	0	T(1): 0.0; S(10): 100.0	1.07099e+08	0	6.57e-08	49.6	0.00033936	2	1931.91	3.01139	21.2914	0
High	SWEDsPER	1	1	1	Q9UDY2	S5(Phospho)	0	S(1): 0.0; S(5): 100.0	2.22313e+06	0.002	0.02964	26.49	0.0139121	2	1085.39	0.571532	11.6625	0
High	GSYGsDAEEEEYR	1	1	1	Q9UDY2	S5(Phospho)	0	S(2): 0.0; Y(3): 0.0; S(5): 100.0; Y(12): 0.0	5.53685e+06	0	3.013e-07	64.83	2.94322e-06	2	1571.56	1.3918	13.2107	0
High	GRsIDQDYER	1	1	1	Q9UDY2	S3(Phospho)	0	S(3): 100.0; Y(8): 0.0	1.07609e+07	0	2.211e-05	49.19	0.000206664	2	1318.54	0.66603	7.93059	1
High	DNsPPPAFKPEPPK	2	1	1	Q9UDY2	S3(Phospho)	0	S(3): 100.0	8.01813e+07	0	5.149e-05	40.65	0.00207069	2	1600.74	0.450027	15.9314	1
High	AAsSDQLRDNSPPPAFKPEPPK	3	1	1	Q9UDY2	S3(Phospho)	0	S(3): 33.3; S(4): 33.3; S(11): 33.3	1.80041e+07	0	0.0001907	16.02	0.881372	3	2429.15	1.13567	14.9172	2
High	SILKPSTPIPPQEGEEVGEsSEEQDNAPK	2	1	1	Q9UDY2	S20(Phospho)	0	S(1): 0.0; S(6): 0.0; T(7): 0.0; S(20): 50.0; S(21): 50.0	5.06801e+07	0	1.202e-05	17.83	0.651848	3	3172.46	1.1651	20.4936	1
High	GsYGSDAEEEEYRQQLSEHSK	1	1	1	Q9UDY2	S2(Phospho)	0	S(2): 2.6; Y(3): 97.3; S(5): 0.1; Y(12): 0.0; S(17): 0.0; S(20): 0.0	1.89837e+07	0	0.0001366	17.65	0.477579	3	2509.02	1.06979	13.7239	1
High	KVQVAALQAsPPLDQDDR	2	1	1	Q9UDY2	S10(Phospho)	0	S(10): 100.0	3.27581e+07	0	6.842e-11	32.2	0.0161486	3	2030.99	0.568282	19.6962	1
High	sIDQDYER	1	1	1	Q9UDY2	S1(Phospho)	0	S(1): 100.0; Y(6): 0.0	4.07705e+06	0	0.0001734	42.24	0.000411954	2	1105.42	0.601993	11.6487	0
High	LQQGAGLEsPQGQPEPGAAsPQR	1	1	1	Q9H6F5	S9(Phospho); S20(Phospho)	0	S(9): 100.0; S(20): 100.0	5.25999e+07	0	2.983e-05	12.21	2.05301	3	2463.07	0.760583	20.0878	0
High	QQDLHLEsPQRQPEYsPESPR	1	1	1	Q9H6F5	S8(Phospho); S16(Phospho)	0	S(8): 100.0; Y(15): 2.8; S(16): 94.5; S(19): 2.8	4.73561e+07	0	0.001418	21.11	0.271836	3	2681.14	0.282169	16.8132	1
High	QPEYSPEsPR	1	1	1	Q9H6F5	S8(Phospho)	0	Y(4): 0.0; S(5): 0.0; S(8): 100.0	3.44452e+07	0	0.002493	44.63	0.000507916	2	1269.52	1.77475	11.1951	0
High	QQDLHLEsPQR	1	1	1	Q9H6F5	S8(Phospho)	0	S(8): 100.0	9.58876e+06	0	2.324e-06	58.01	3.51828e-05	2	1430.64	1.24443	11.7681	0
High	LGGLRPEsPESLTSVSR	2	1	1	Q9H6F5	S8(Phospho)	0	S(8): 100.0; S(11): 0.0; T(13): 0.0; S(14): 0.0; S(16): 0.0	2.3358e+08	0	3.602e-09	55	8.79113e-05	3	1864.92	0.401187	19.5225	1
High	AGLGsPERPPK	2	1	1	Q9H6F5	S5(Phospho)	0	S(5): 100.0	8.53526e+07	0	0.001411	33.62	0.00803844	2	1188.58	0.912384	8.46786	1
High	EPGsPPSVQR	1	1	1	Q9H6F5	S4(Phospho)	0	S(4): 100.0; S(7): 0.0	8.07015e+06	0	0.0002229	34.45	0.0062273	2	1133.5	1.48347	11.068	0
High	LQQGAGLESPQGQPEPGAAsPQR	2	1	1	Q9H6F5	S20(Phospho)	0	S(9): 0.0; S(20): 100.0	2.20651e+08	0	2.062e-07	33.5	0.0154999	2	2383.11	3.02935	16.7078	0
High	ALVEFESNPEETREPGsPPSVQR	1	1	1	Q9H6F5	S17(Phospho)	0	S(7): 0.0; T(12): 0.0; S(17): 98.0; S(20): 2.0	4.45004e+08	0	0.000193	11.08	3.02574	3	2635.21	1.67376	20.3818	1
High	QGSGRESPsLASR	2	1	1	Q8WWM7	S9(Phospho)	0	S(3): 2.3; S(7): 97.7; S(9): 0.1; S(12): 0.0	1.68757e+07	0.001	0.00802	31.64	0.0136755	2	1411.63	0.434964	6.72189	1
High	STSTPTsPGPR	1	1	1	Q8WWM7	S7(Phospho)	0	S(1): 0.0; T(2): 0.0; S(3): 0.0; T(4): 0.0; T(6): 0.0; S(7): 100.0	2.17364e+07	0	4.126e-05	40.23	0.00137521	2	1167.5	0.519091	7.83113	0
High	GPPQsPVFEGVYNNSR	1	1	1	Q8WWM7	S5(Phospho)	0	S(5): 100.0; Y(12): 0.0; S(15): 0.0	0	0	1.443e-05	27.3	0.0531626	2	1827.81	1.32347	22.3559	0
High	LQPSsSPENSLDPFPPR	2	1	1	Q8WWM7	S5(Phospho)	0	S(4): 33.3; S(5): 33.3; S(6): 33.3; S(10): 0.0	2.91478e+07	0	0.0004909	15.19	0.948937	2	1947.89	1.46857	25.8414	0
High	STsTPTsPGPR	1	1	1	Q8WWM7	S3(Phospho); S7(Phospho)	0	S(1): 1.9; T(2): 1.9; S(3): 94.4; T(4): 1.9; T(6): 50.0; S(7): 50.0	2.23913e+06	0.001	0.01214	10.28	0.825055	2	1247.47	-0.119271	11.5052	0
High	EKEVDGLLTSEPMGsPVSSK	2	1	1	Q8WWM7	S15(Phospho)	0	T(9): 0.0; S(10): 0.0; S(15): 98.6; S(18): 1.4; S(19): 0.0	1.18748e+07	0	3.616e-08	58.32	4.68195e-05	3	2170	-0.165054	21.3896	1
High	EVDGLLTSEPMGsPVSSK	1	1	1	Q8WWM7	S13(Phospho)	0	T(7): 0.0; S(8): 0.0; S(13): 49.8; S(16): 49.8; S(17): 0.4	1.06456e+07	0	6.259e-10	63.47	1.22115e-05	2	1912.86	1.63683	25.8846	0
High	EKEVDGLLTSEPmGsPVSSK	2	1	1	Q8WWM7	M13(Oxidation); S15(Phospho)	0	T(9): 0.0; S(10): 0.0; S(15): 100.0; S(18): 0.0; S(19): 0.0	5.47107e+06	0	5.713e-06	17.99	0.528986	3	2186	3.64213	18.421	1
High	EVDGLLTSEPmGsPVSSK	1	1	1	Q8WWM7	M11(Oxidation); S13(Phospho)	0	T(7): 0.0; S(8): 0.0; S(13): 98.9; S(16): 1.1; S(17): 0.0	7.38744e+06	0	1.157e-05	32.48	0.0154793	2	1928.86	1.34837	22.7333	0
High	EGEEPTVYsDEEEPKDESAR	2	1	1	O00264	S9(Phospho)	0	T(6): 0.0; Y(8): 0.0; S(9): 100.0; S(18): 0.0	1.15227e+08	0	2.427e-09	48.44	0.000332268	3	2375.94	1.43994	13.3183	1
High	IVRGDQPAASGDsDDDEPPPLPR	1	1	1	O00264	S13(Phospho)	0	S(10): 0.0; S(13): 100.0	2.99533e+06	0	1.222e-06	27.87	0.0551155	3	2484.1	0.288694	17.4055	1
High	GDQPAASGDsDDDEPPPLPR	1	1	1	O00264	S10(Phospho)	0	S(7): 0.9; S(10): 99.1	7.6115e+07	0	9.601e-10	76.23	5.19346e-07	2	2115.85	1.61876	19.8971	0
High	PKPSSsPVIFAGGQDR	4	1	1	Q15366	S6(Phospho)	0	S(4): 0.0; S(5): 0.0; S(6): 100.0	2.37589e+07	0	1.248e-05	52.52	0.000154773	2	1722.82	1.23488	14.9078	1
High	PSSsPVIFAGGQDR	1	1	1	Q15366	S4(Phospho)	0	S(2): 0.0; S(3): 0.9; S(4): 99.1	7.80279e+07	0	5.467e-07	68.93	2.85302e-06	2	1497.67	0.547272	19.6353	0
High	LHQLAmQQSHFPMTHGNTGFSGIEsSSPEVK	6	1	1	Q15366	M6(Oxidation); S25(Phospho)	0	S(9): 0.0; T(14): 0.0; T(18): 0.0; S(21): 0.0; S(25): 33.3; S(26): 33.3; S(27): 33.3	1.10391e+07	0	0.0002406	19.66	0.453662	4	3478.56	2.48507	18.1206	0
High	QIcVVMLETLSQsPPK	1	1	1	Q15366	C3(Carbamidomethyl); S13(Phospho)	0	T(9): 0.0; S(11): 1.0; S(13): 99.0	7.15714e+06	0	0.0003748	34.71	0.0099222	2	1909.92	1.62043	30.9296	0
High	SRLtPVsPESSSTEEK	1	1	1	Q13501	T4(Phospho); S7(Phospho)	0	S(1): 1.5; T(4): 98.5; S(7): 100.0; S(10): 0.0; S(11): 0.0; S(12): 0.0; T(13): 0.0	9.79268e+06	0	9.069e-06	25.29	0.071436	2	1893.79	1.20152	13.3149	1
High	SRLtPVSPESSSTEEK	2	1	1	Q13501	T4(Phospho)	0	S(1): 0.0; T(4): 100.0; S(7): 0.0; S(10): 0.0; S(11): 0.0; S(12): 0.0; T(13): 0.0	3.36477e+07	0	4.47e-10	53.66	0.000114305	3	1813.82	1.36038	11.1356	1
High	LTPVsPESSSTEEK	1	1	1	Q13501	S5(Phospho)	0	T(2): 0.0; S(5): 100.0; S(8): 0.0; S(9): 0.0; S(10): 0.0; T(11): 0.0	7.17589e+07	0	1.509e-08	75.77	5.77373e-07	2	1570.69	0.278904	13.8919	0
High	IALESEGRPEEQMEsDNcSGGDDDWTHLSSK	2	1	1	Q13501	S15(Phospho); C18(Carbamidomethyl)	0	S(5): 1.0; S(15): 49.5; S(19): 49.5; T(26): 0.0; S(29): 0.0; S(30): 0.0	1.61637e+07	0	8.691e-07	31.26	0.0255874	3	3559.43	-0.289433	20.5064	1
High	IALESEGRPEEQmESDNcsGGDDDWTHLSSK	1	1	1	Q13501	M13(Oxidation); C18(Carbamidomethyl); S19(Phospho)	0	S(5): 1.3; S(15): 48.7; S(19): 48.7; T(26): 1.3; S(29): 0.0; S(30): 0.0	6.4198e+06	0.001	0.006561	20.52	0.2728	3	3575.41	-2.72393	19.0861	1
High	EGEDGDQPTtPPKPLK	1	1	1	P18858	T10(Phospho)	0	T(9): 1.4; T(10): 98.6	1.69271e+07	0	8.754e-05	35.22	0.00828174	2	1788.81	1.21776	12.7608	1
High	VLGSEGEEEDEALsPAK	2	1	1	P18858	S14(Phospho)	0	S(4): 0.0; S(14): 100.0	1.12562e+07	0	6.528e-13	79.53	2.94174e-07	2	1839.79	1.35861	18.0012	0
High	TIQEVLEEQsEDEDR	1	1	1	P18858	S10(Phospho)	0	T(1): 0.0; S(10): 100.0	4.82314e+06	0	0.0006666	33.44	0.00966936	2	1899.78	-4.20408	20.7084	0
High	TIQEVLEEQsEDEDREAK	2	1	1	P18858	S10(Phospho)	0	T(1): 0.0; S(10): 100.0	1.69794e+07	0	2.254e-06	40.84	0.00263312	3	2227.97	3.282	16.8991	1
High	QLHLEGASLELsDDDTESK	2	1	1	P35580	S12(Phospho)	0	S(8): 0.0; S(12): 100.0; T(16): 0.0; S(18): 0.0	9.60261e+06	0	2.062e-08	63.47	1.39432e-05	3	2166.94	0.234812	22.8266	0
High	GSSDGRGsDSESDLPHR	6	1	1	Q9UPQ0	S8(Phospho)	0	S(2): 0.0; S(3): 1.0; S(8): 99.0; S(10): 0.0; S(12): 0.0	1.52775e+07	0	1.678e-07	56.62	4.10498e-05	3	1838.73	1.14243	7.07461	1
High	QTPsPDVVLR	1	1	1	Q9UPQ0	S4(Phospho)	0	T(2): 0.0; S(4): 100.0	1.30571e+07	0	0.0005017	40.42	0.00172032	2	1191.58	-0.0255161	19.7827	0
High	ASVLDTSMSAGSGsPSK	1	1	1	Q9UPQ0	S14(Phospho)	0	S(2): 0.0; T(6): 0.0; S(7): 0.0; S(9): 0.0; S(12): 0.8; S(14): 98.4; S(16): 0.8	6.03671e+06	0	8.282e-12	64.3	8.04374e-06	2	1661.71	-2.34015	18.1451	0
High	sPEPEATLTFPFLDK	1	1	1	Q9UPQ0	S1(Phospho)	0	S(1): 100.0; T(7): 0.0; T(9): 0.0	7.23699e+07	0	2.729e-09	72.55	1.69273e-06	2	1771.82	0.991116	35.5574	0
High	ASVLDTSmSAGsGSPSK	2	1	1	Q9UPQ0	M8(Oxidation); S12(Phospho)	0	S(2): 0.0; T(6): 0.0; S(7): 0.0; S(9): 0.0; S(12): 49.6; S(14): 49.6; S(16): 0.8	4.6673e+06	0	3.072e-05	20.54	0.172201	2	1677.71	1.07689	13.7942	0
High	sIHFSsPVFTSR	1	1	1	P08729	N-Term(Acetyl); S6(Phospho)	0	S(1): 0.0; S(5): 0.0; S(6): 100.0; T(10): 0.0; S(11): 0.0	1.26436e+07	0	2.74e-06	60.73	2.0498e-05	2	1486.67	0.812837	27.1372	0
High	LDGLVEtPTGYIESLPR	2	1	1	P55209	T7(Phospho)	0	T(7): 100.0; T(9): 0.0; Y(11): 0.0; S(14): 0.0	1.64521e+07	0	3.467e-07	62.49	1.47391e-05	2	1939.94	-1.32169	33.2721	0
High	PSPGTPtSPSNLTSGLK	2	1	1	Q5VT52	T7(Phospho)	0	S(2): 0.0; T(5): 0.8; T(7): 49.2; S(8): 49.2; S(10): 0.8; T(13): 0.0; S(14): 0.0	9.34027e+06	0	1.324e-05	16.77	0.577487	2	1720.82	2.53219	20.7997	0
High	DVEDMELsDVEDDGSK	1	1	1	Q5VT52	S8(Phospho)	0	S(8): 100.0; S(15): 0.0	5.98116e+06	0	1.44e-07	41.09	0.000832499	2	1862.69	0.597289	25.6448	0
High	LESESTsPSLEMK	1	1	1	Q5VT52	S7(Phospho)	0	S(3): 0.0; S(5): 0.0; T(6): 0.0; S(7): 100.0; S(9): 0.0	5.55436e+06	0	2.144e-06	41.07	0.0014421	2	1517.65	1.97017	17.1005	0
High	ASIGQsPGLPSTTFK	1	1	1	Q5VT52	S6(Phospho)	0	S(2): 1.2; S(6): 98.8; S(11): 0.0; T(12): 0.0; T(13): 0.0	4.89655e+06	0	0.002605	20.55	0.225108	2	1570.75	0.969545	22.361	0
High	SFNYsPNSSTSEVSSTSASK	1	1	1	Q5VT52	S5(Phospho)	0	S(1): 0.0; Y(4): 0.0; S(5): 100.0; S(8): 0.0; S(9): 0.0; T(10): 0.0; S(11): 0.0; S(14): 0.0; S(15): 0.0; T(16): 0.0; S(17): 0.0; S(19): 0.0	11745248	0	1.568e-15	102.11	1.51334e-09	2	2146.88	-0.174824	17.1672	0
High	IIsPGSSTPSSTR	1	1	1	Q5VT52	S3(Phospho)	0	S(3): 100.0; S(6): 0.0; S(7): 0.0; T(8): 0.0; S(10): 0.0; S(11): 0.0; T(12): 0.0	607121	0	2.056e-05	42.73	0.001296	2	1369.64	1.12911	13.5192	0
High	RmsGEPIQTVESIR	1	1	1	Q5VT52	M2(Oxidation); S3(Phospho)	0	S(3): 100.0; T(9): 0.0; S(12): 0.0	7.34815e+06	0.001	0.008501	12.64	1.35037	2	1698.79	1.06976	16.3845	1
High	LSGLsFK	1	1	1	P49006	S5(Phospho)	0	S(2): 0.0; S(5): 100.0	1.45015e+07	0.002	0.02019	35.7	0.00399693	2	831.401	0.14608	20.7277	0
High	LSGLsFKR	1	1	1	P49006	S5(Phospho)	0	S(2): 0.0; S(5): 100.0	3.27917e+07	0	0.0003718	56.25	4.10248e-05	2	987.503	0.200243	14.581	1
High	KTSFDQDsDVDIFPSDFPTEPPSLPR	1	1	1	Q02880	S8(Phospho)	0	T(2): 97.1; S(3): 1.4; S(8): 1.4; S(15): 0.0; T(19): 0.0; S(23): 0.0	5.29008e+07	0	3.214e-10	46.32	0.000950884	3	3017.35	0.252271	31.7213	1
High	KAsGSENEGDYNPGR	1	1	1	Q02880	S3(Phospho)	0	S(3): 100.0; S(5): 0.0; Y(11): 0.0	6.12551e+06	0	1.186e-06	63.02	7.38349e-06	2	1660.66	1.4746	6.76167	1
High	FDsNEEDSASVFSPSFGLK	1	1	1	Q02880	S3(Phospho)	0	S(3): 100.0; S(8): 0.0; S(10): 0.0; S(13): 0.0; S(15): 0.0	7.23146e+06	0	2.265e-10	73.88	1.03134e-06	2	2142.89	0.90965	31.756	0
High	ASPITNDGEDEFVPSDGLDKDEYTFsPGK	1	1	1	Q02880	S26(Phospho)	0	S(2): 0.0; T(5): 0.0; S(15): 0.0; Y(23): 1.7; T(24): 1.7; S(26): 96.6	1.61403e+07	0	0.0009304	15.08	1.20457	3	3210.38	3.43664	26.5929	1
High	AsGSENEGDYNPGR	2	1	1	Q02880	S2(Phospho)	0	S(2): 50.0; S(4): 50.0; Y(10): 0.0	2.68239e+06	0.001	0.003885	12.31	0.602177	2	1532.57	1.03984	9.39587	0
High	SEDDSAKFDsNEEDSASVFSPSFGLK	1	1	1	Q02880	S10(Phospho)	0	S(1): 0.0; S(5): 0.0; S(10): 100.0; S(15): 0.0; S(17): 0.0; S(20): 0.0; S(22): 0.0	3.2244e+07	0	5.675e-10	45.37	0.00103383	3	2875.19	1.63328	27.7029	1
High	SAsSDTSEELNSQDSPPK	3	1	1	O14745	S3(Phospho)	0	S(1): 0.6; S(3): 99.4; S(4): 0.0; T(6): 0.0; S(7): 0.0; S(12): 0.0; S(15): 0.0	2.36144e+07	0	5.393e-13	119.86	2.39084e-11	2	1958.79	2.6594	13.3807	0
High	EALAEAALEsPRPALVR	2	1	1	O14745	S10(Phospho)	0	S(10): 100.0	1.63552e+07	0	2.402e-09	55.72	6.04152e-05	3	1872.96	0.276539	22.22	1
High	HIKEEPLsEEEPcTSTAIAsPEK	1	1	1	Q9Y2X3	S8(Phospho); C13(Carbamidomethyl); S20(Phospho)	0	S(8): 100.0; T(14): 0.0; S(15): 0.0; T(16): 0.0; S(20): 100.0	4.29893e+07	0	5.977e-08	41.77	0.00254134	3	2742.17	1.27638	17.8868	1
High	HIKEEPLsEEEPcTSTAIAsPEKK	1	1	1	Q9Y2X3	S8(Phospho); C13(Carbamidomethyl); S20(Phospho)	0	S(8): 100.0; T(14): 0.0; S(15): 0.0; T(16): 0.0; S(20): 100.0	5.5058e+07	0	5.181e-10	52.51	0.00022498	3	2870.26	2.60187	15.0634	2
High	HIKEEPLsEEEPcTSTAIASPEK	1	1	1	Q9Y2X3	S8(Phospho); C13(Carbamidomethyl)	0	S(8): 100.0; T(14): 0.0; S(15): 0.0; T(16): 0.0; S(20): 0.0	6.37896e+07	0	5.846e-09	43.95	0.00157462	3	2662.2	2.33191	16.1628	1
High	EEPLsEEEPcTSTAIAsPEK	1	1	1	Q9Y2X3	S5(Phospho); C10(Carbamidomethyl); S17(Phospho)	0	S(5): 100.0; T(11): 0.0; S(12): 0.0; T(13): 0.0; S(17): 100.0	12472942	0	3.452e-06	29.96	0.0227082	2	2363.92	-1.33905	25.2362	0
High	EEPLsEEEPcTSTAIAsPEKK	1	1	1	Q9Y2X3	S5(Phospho); C10(Carbamidomethyl); S17(Phospho)	0	S(5): 100.0; T(11): 0.0; S(12): 0.0; T(13): 0.0; S(17): 100.0	1.23024e+07	0	5.583e-05	26.14	0.0710204	2	2492.02	0.983352	20.1466	1
High	EEPLsEEEPcTSTAIASPEK	1	1	1	Q9Y2X3	S5(Phospho); C10(Carbamidomethyl)	0	S(5): 100.0; T(11): 0.0; S(12): 0.0; T(13): 0.0; S(17): 0.0	2.18885e+07	0	2.498e-11	62.71	1.65025e-05	2	2283.96	-0.307183	21.6119	0
High	YGPADVEDTTGSGATDSKDDDDIDLFGsDDEEESEEAKR	3	1	1	P24534	S28(Phospho)	0	Y(1): 0.0; T(9): 0.0; T(10): 0.0; S(12): 0.0; T(15): 0.0; S(17): 0.0; S(28): 100.0; S(34): 0.0	1.28352e+09	0	3.673e-15	47.05	0.000636106	4	4260.69	0.868368	23.6942	2
High	DDDDIDLFGsDDEEESEEAK	1	1	1	P24534	S10(Phospho)	0	S(10): 98.6; S(16): 1.4	3650851	0	2.188e-05	26.02	0.0318794	2	2352.84	0.990485	30.0454	0
High	DDDDIDLFGsDDEEESEEAKR	2	1	1	P24534	S10(Phospho)	0	S(10): 100.0; S(16): 0.0	2.20969e+07	0	9.552e-10	48.92	0.000266084	3	2508.94	1.39179	24.5695	1
High	SEPVKEESSELEQPFAQDtSSVGPDRK	3	2	1	Q15424	T19(Phospho)	0	S(1): 0.0; S(8): 0.0; S(9): 0.0; T(19): 33.3; S(20): 33.3; S(21): 33.3	1.02629e+07	0	5.213e-08	36.24	0.00909141	3	3056.37	-1.78619	17.5288	2
High	SVVsFDKVK	1	1	1	Q15424	S4(Phospho)	0	S(1): 0.0; S(4): 100.0	2.55931e+07	0	0.003035	39.87	0.00173105	2	1088.54	-0.0536611	15.2038	1
High	SEPVKEESSELEQPFAQDTsSVGPDR	2	2	1	Q15424	S20(Phospho)	0	S(1): 0.0; S(8): 0.0; S(9): 0.0; T(19): 0.9; S(20): 49.6; S(21): 49.6	1.34111e+07	0	1.351e-09	56.91	8.38243e-05	3	2928.28	1.65796	20.4678	1
High	sVVSFDK	1	1	1	Q15424	S1(Phospho)	0	S(1): 100.0; S(4): 0.0	1.84465e+06	0.001	0.01556	23.18	0.050969	2	861.375	-0.210821	15.463	0
High	TDcEPVGLEPAVEQSSAASELAEASSEELAEAPTEAPsPEAR	1	2	1	Q15424	C3(Carbamidomethyl); S38(Phospho)	0	T(1): 0.0; S(15): 0.0; S(16): 0.0; S(19): 0.0; S(25): 0.0; S(26): 0.0; T(34): 0.0; S(38): 100.0	4.61463e+07	0	4.756e-09	30.1	0.0419723	4	4391.93	2.0049	33.6268	0
High	KIEEAMDGSEtPQLFTVLPEK	1	1	1	Q13435	T11(Phospho)	0	S(9): 1.2; T(11): 98.8; T(16): 0.0	5.77688e+06	0	2.658e-07	38.04	0.00531568	3	2442.15	-0.55644	27.2961	1
High	SSLGQsASETEEDTVSVSK	4	1	1	Q13435	S6(Phospho)	0	S(1): 1.1; S(2): 1.1; S(6): 97.7; S(8): 0.0; T(10): 0.0; T(14): 0.0; S(16): 0.0; S(18): 0.0	1.2681e+07	0	3.611e-12	98.2	4.41203e-09	2	2020.86	1.40533	16.6523	0
High	SsLGQsASETEEDTVSVSK	3	1	1	Q13435	S2(Phospho); S6(Phospho)	0	S(1): 50.0; S(2): 50.0; S(6): 49.5; S(8): 49.5; T(10): 1.0; T(14): 0.0; S(16): 0.0; S(18): 0.0	2.64416e+07	0	2.869e-09	55.61	5.82554e-05	2	2100.83	0.760118	20.9115	0
High	NHSDSSTSESEVSSVsPLK	2	1	1	Q9NY27	S16(Phospho)	0	S(3): 0.0; S(5): 0.0; S(6): 0.0; T(7): 0.0; S(8): 0.0; S(10): 0.0; S(13): 0.0; S(14): 0.0; S(16): 100.0	1.65973e+07	0	2.25e-15	70.1	2.58968e-06	2	2056.87	0.792345	13.2743	0
High	GRPSKtPsPSQPK	1	1	1	Q9NTI5	T6(Phospho); S8(Phospho)	0	S(4): 98.8; T(6): 1.2; S(8): 100.0; S(10): 0.0	3.26883e+06	0.001	0.01234	13.77	0.847913	3	1526.68	0.994873	5.68066	2
High	GHTAsESDEQQWPEEK	1	1	1	Q9NTI5	S5(Phospho)	0	T(3): 1.2; S(5): 97.5; S(7): 1.2	8.45606e+06	0	0.0002429	29.99	0.0209482	2	1937.76	2.24106	11.1217	0
High	LDSsEMDHSENEDYTmSSPLPGK	4	1	1	Q9NTI5	S4(Phospho); M16(Oxidation)	0	S(3): 19.8; S(4): 19.8; S(9): 19.8; Y(14): 19.8; T(15): 19.8; S(17): 0.5; S(18): 0.5	3.90215e+06	0	0.002919	16.51	0.607532	3	2665.04	3.26982	17.9814	0
High	AEsPESSAIESTQStPQK	1	1	1	Q9NTI5	S3(Phospho); T15(Phospho)	0	S(3): 100.0; S(6): 0.0; S(7): 0.0; S(11): 1.8; T(12): 1.8; S(14): 1.8; T(15): 94.6	5.56102e+06	0	0.001746	23.28	0.100087	2	2036.81	1.47212	17.0405	0
High	AEsPESSAIESTQSTPQK	1	1	1	Q9NTI5	S3(Phospho)	0	S(3): 100.0; S(6): 0.0; S(7): 0.0; S(11): 0.0; T(12): 0.0; S(14): 0.0; T(15): 0.0	2.12553e+07	0	3.37e-10	79.82	2.94976e-07	2	1956.85	1.85564	14.0953	0
High	METVSNASSSSNPSsPGR	2	1	1	Q9NTI5	S15(Phospho)	0	T(3): 0.0; S(5): 0.0; S(8): 0.0; S(9): 0.0; S(10): 0.0; S(11): 0.0; S(14): 0.8; S(15): 99.2	7.67787e+06	0	6.323e-10	67.07	4.98694e-06	2	1874.76	2.22571	11.2421	0
High	LKEDILENEDEQNsPPK	2	1	1	Q9NTI5	S14(Phospho)	0	S(14): 100.0	8.3862e+06	0	1.207e-05	30.9	0.0243036	2	2077.94	2.71794	16.2267	1
High	mETVSNASSSSNPsSPGR	2	1	1	Q9NTI5	M1(Oxidation); S14(Phospho)	0	T(3): 0.0; S(5): 0.0; S(8): 0.0; S(9): 0.0; S(10): 0.0; S(11): 0.0; S(14): 50.0; S(15): 50.0	3.95543e+06	0	4.648e-06	26.13	0.0527786	2	1890.76	3.15312	8.89485	0
High	KGGSYSQAASSDSAQGSDVsLTAcK	2	6	1	P01891	S20(Phospho); C24(Carbamidomethyl)	0.0147	S(4): 0.0; Y(5): 0.0; S(6): 0.0; S(10): 0.0; S(11): 0.0; S(13): 0.0; S(17): 0.0; S(20): 100.0; T(22): 0.0	6.75307e+06	0	2.063e-09	66.87	7.08254e-06	3	2542.08	2.31827	12.8131	1
High	asGVAVSDGVIK	2	1	1	P23528	N-Term(Acetyl); S2(Phospho)	0	S(2): 100.0; S(7): 0.0	1.93467e+08	0	3.125e-08	71.84	1.27654e-06	2	1224.59	0.0821274	27.6937	0
High	NKPGPNIEsGNEDDDASFK	2	1	1	O60841	S9(Phospho)	0	S(9): 100.0; S(17): 0.0	2.04044e+08	0	1.459e-12	78.63	3.67396e-07	2	2113.88	2.55935	13.4593	1
High	KQSFDDNDsEELEDKDSK	1	1	1	O60841	S9(Phospho)	0	S(3): 0.0; S(9): 100.0; S(17): 0.0	22286735	0	4.575e-07	34.27	0.00858584	3	2208.88	1.11691	9.29452	2
High	QSFDDNDsEELEDKDSK	3	1	1	O60841	S8(Phospho)	0	S(2): 50.0; S(8): 50.0; S(16): 0.0	9.36835e+06	0	1.521e-07	52.21	0.000105807	2	2080.79	1.60245	12.5443	1
High	VEMYsGsDDDDDFNKLPK	1	1	1	O60841	S5(Phospho); S7(Phospho)	0	Y(4): 66.7; S(5): 66.7; S(7): 66.7	3.57391e+07	0.001	0.003782	17.39	0.270849	2	2234.83	2.85141	23.9818	1
High	KWDGsEEDEDNSK	1	1	1	O60841	S5(Phospho)	0	S(5): 50.0; S(12): 50.0	3.37143e+06	0.009	0.1085	16.25	0.251366	2	1618.59	1.55869	6.8873	1
High	VEmysGSDDDDDFNKLPK	3	1	1	O60841	M3(Oxidation); Y4(Phospho); S5(Phospho)	0	Y(4): 66.7; S(5): 66.7; S(7): 66.7	2.39176e+07	0.001	0.004991	14.1	0.494087	2	2250.82	2.37864	21.1968	1
High	ESVPEFPLsPPK	2	1	1	P16949	S9(Phospho)	0	S(2): 0.0; S(9): 100.0	2.35602e+08	0	0.000788	30.46	0.0184397	2	1406.66	0.473491	27.6322	0
High	RAsGQAFELILsPR	2	1	1	P16949	S3(Phospho); S12(Phospho)	0	S(3): 100.0; S(12): 100.0	1.70483e+07	0	0.000186	26.22	0.0644709	3	1704.79	-0.614978	28.4853	1
High	RAsGQAFELILSPR	2	1	1	P16949	S3(Phospho)	0	S(3): 100.0; S(12): 0.0	1.54069e+07	0	2.316e-05	41.96	0.00130225	3	1624.82	-2.69749	24.741	1
High	ASGQAFELILsPR	3	1	1	P16949	S11(Phospho)	0	S(2): 0.0; S(11): 100.0	5.34024e+07	0	8.929e-10	65.37	6.66473e-06	2	1468.72	1.58582	28.7795	0
High	SKESVPEFPLsPPK	2	1	1	P16949	S11(Phospho)	0	S(1): 0.0; S(4): 0.0; S(11): 100.0	8.26096e+07	0	5.301e-05	35.21	0.00759278	3	1621.79	0.712199	21.7072	1
High	EGPEPPEEVPPPtTPPVPK	2	1	1	P48634	T13(Phospho)	0	T(13): 50.0; T(14): 50.0	7.9255e+06	0	0.000868	10.8	2.58263	3	2073.97	-1.5987	23.8309	0
High	LIPGPLsPVAR	1	1	1	P48634	S7(Phospho)	0	S(7): 100.0	2.00734e+07	0	0.000152	46.38	0.00033486	2	1199.66	0.695989	25.0862	0
High	RPGGsSPLNAVPcEGPPGSEPPR	2	1	1	P48634	S5(Phospho); C13(Carbamidomethyl)	0	S(5): 50.0; S(6): 50.0; S(19): 0.0	1.01171e+07	0	4.201e-06	20.65	0.304361	3	2395.08	-0.616423	17.4242	1
High	ERSDsGGSSSEPFDR	1	1	1	P48634	S5(Phospho)	0	S(3): 2.5; S(5): 97.3; S(8): 0.1; S(9): 0.1; S(10): 0.1	6.59163e+06	0.002	0.02943	13.66	0.602737	2	1692.65	2.18455	9.22432	1
High	PLTsPLR	1	1	1	P48634	S4(Phospho)	0	T(3): 0.9; S(4): 99.1	7.59072e+06	0.009	0.1042	26.61	0.0222638	2	863.438	-0.536593	15.0293	0
High	KGNsPNSEPPTPK	1	1	1	P48634	S4(Phospho)	0	S(4): 99.1; S(7): 0.9; T(11): 0.0	7.26058e+06	0	3.588e-05	50.67	0.000194119	2	1432.65	2.58123	6.39233	1
High	ASsLLSR	1	1	1	P48634	S3(Phospho)	0	S(2): 1.3; S(3): 98.7; S(6): 0.0	478931	0.004	0.05739	22.12	0.0966675	2	813.387	0.152509	10.0521	0
High	SDsGGSSSEPFDR	2	1	1	P48634	S3(Phospho)	0	S(1): 1.6; S(3): 98.4; S(6): 0.0; S(7): 0.0; S(8): 0.0	2.00468e+06	0	6.664e-05	26.3	0.0171129	2	1407.51	0.31618	13.0611	0
High	KQsSSEISLAVER	1	1	1	P48634	S3(Phospho)	0	S(3): 100.0; S(4): 0.0; S(5): 0.0; S(8): 0.0	6.90857e+06	0	1.436e-10	91.4	1.58289e-08	2	1513.73	-0.137914	14.5861	1
High	ESSANNSVsPSESLR	1	1	1	Q04726	S9(Phospho)	0	S(2): 0.0; S(3): 0.0; S(7): 0.0; S(9): 100.0; S(11): 0.0; S(13): 0.0	1.81234e+07	0	6.247e-12	97.29	4.05004e-09	2	1643.69	0.923598	13.5603	0
High	DAPTsPASVASSSSTPSSK	2	1	1	Q04726	S5(Phospho)	0.0278	T(4): 1.0; S(5): 99.0; S(8): 0.0; S(11): 0.0; S(12): 0.0; S(13): 0.0; S(14): 0.0; T(15): 0.0; S(17): 0.0; S(18): 0.0	2.63892e+07	0	1.285e-10	69.91	2.98625e-06	2	1843.8	1.87636	15.2919	0
High	LTQtSSTEQLNVLETETEVLNK	5	1	1	Q5JSH3	T4(Phospho)	0	T(2): 20.0; T(4): 20.0; S(5): 20.0; S(6): 20.0; T(7): 20.0; T(15): 0.0; T(17): 0.0	4.08464e+06	0	1.274e-05	29.18	0.0381669	2	2557.23	1.88307	29.7999	0
High	VGNEsPVQELK	1	1	1	Q5JSH3	S5(Phospho)	0	S(5): 100.0	2.53191e+07	0	4.919e-08	81.21	1.30554e-07	2	1279.59	0.121091	14.7958	0
High	EYVSNDAAQsDDEEKLQSQPTDTDGGR	1	1	1	Q5JSH3	S10(Phospho)	0	Y(2): 0.0; S(4): 0.0; S(10): 100.0; S(18): 0.0; T(21): 0.0; T(23): 0.0	4.21437e+07	0	1.357e-12	73.41	1.57789e-06	3	3035.25	2.0878	14.6744	1
High	SSGsPYGGGYGSGGGSGGYGSR	3	1	1	P51991	S4(Phospho)	0.0382	S(1): 0.0; S(2): 0.0; S(4): 100.0; Y(6): 0.0; Y(10): 0.0; S(12): 0.0; S(16): 0.0; Y(19): 0.0; S(21): 0.0	3.00931e+07	0	3.877e-14	126.43	3.66291e-12	2	1990.76	2.34163	13.1615	0
High	TAFYNEDDsEEEQR	1	1	1	Q8WWQ0	S9(Phospho)	0	T(1): 0.0; Y(4): 0.0; S(9): 100.0	1.8174e+07	0	3.271e-09	92.55	7.75486e-09	2	1812.66	1.90948	15.3951	0
High	DGPIsPK	1	1	1	Q8WWQ0	S5(Phospho)	0	S(5): 100.0	1.91785e+06	0.006	0.07666	20.35	0.067809	2	793.35	0.496173	11.4966	0
High	AQsYDIQAWK	1	1	1	Q8WWQ0	S3(Phospho)	0	S(3): 98.9; Y(4): 1.1	1.8387e+06	0.001	0.006358	23.99	0.0784084	2	1289.55	-1.25568	21.0816	0
High	GsISSTSEVHSPPNVGLR	7	1	1	Q8WWQ0	S2(Phospho)	0	S(2): 24.9; S(4): 0.2; S(5): 24.9; T(6): 24.9; S(7): 24.9; S(11): 0.0	8.38601e+06	0	3.114e-05	32.55	0.0180669	2	1903.9	5.00971	16.4569	0
High	VNEEKDGPIsPK	1	1	1	Q8WWQ0	S10(Phospho)	0	S(10): 100.0	9.24468e+06	0	5.899e-08	58.16	3.13915e-05	2	1392.64	0.753196	8.11151	1
High	NMPGLSAATLASLGGtSSR	3	1	1	Q32MZ4	T16(Phospho)	0	S(6): 0.0; T(9): 0.0; S(12): 0.0; T(16): 98.2; S(17): 0.9; S(18): 0.9	5.78126e+06	0	1.048e-07	49.25	0.000389234	2	1870.88	1.57669	29.0651	0
High	RGsGDTSISIDTEASIR	1	1	1	Q32MZ4	S3(Phospho)	0	S(3): 100.0; T(6): 0.0; S(7): 0.0; S(9): 0.0; T(12): 0.0; S(15): 0.0	1.7899e+07	0	8.925e-06	31.15	0.0232127	2	1844.84	1.39406	17.732	1
High	cTLPEHEsPSQDISDAcEAESTER	5	1	1	Q32MZ4	C1(Carbamidomethyl); S8(Phospho); C17(Carbamidomethyl)	0	T(2): 1.4; S(8): 97.3; S(10): 1.4; S(14): 0.0; S(21): 0.0; T(22): 0.0	1.59367e+07	0	1.093e-10	83.6	1.08692e-07	3	2828.11	1.94228	17.0868	0
High	tIGGGDDSFTTFFcETGAGK	2	1	1	P68366	T1(Phospho); C14(Carbamidomethyl)	0	T(1): 49.6; S(8): 49.6; T(10): 0.7; T(11): 0.0; T(16): 0.0	4817379	0	1.925e-06	50.27	0.000224124	2	2147.87	3.97565	30.9705	0
High	AStASPcNNNINAATAVALQEPR	6	1	1	Q71RC2	T3(Phospho); C7(Carbamidomethyl)	0	S(2): 50.0; T(3): 50.0; S(5): 0.0; T(15): 0.0	3.21322e+07	0	9.032e-09	63.11	1.82756e-05	3	2450.11	-1.07732	23.5691	0
High	DGLNQTTIPVsPPSTTKPSR	3	1	1	Q71RC2	S11(Phospho)	0	T(6): 0.0; T(7): 0.0; S(11): 100.0; S(14): 0.0; T(15): 0.0; T(16): 0.0; S(19): 0.0	7.20867e+07	0	1.382e-07	22.24	0.171349	3	2176.07	0.714115	20.355	1
High	SAAsPVVSSMPER	1	1	1	P18583	S4(Phospho)	0	S(1): 0.0; S(4): 100.0; S(8): 0.0; S(9): 0.0	5.07916e+06	0	8.032e-07	69.1	2.40518e-06	2	1397.61	1.27608	16.8899	0
High	ESDQTLAALLsPK	1	1	1	P18583	S11(Phospho)	0	S(2): 0.0; T(5): 0.0; S(11): 100.0	4.73756e+07	0	1.851e-07	62.15	1.3806e-05	2	1452.7	0.711812	28.9003	0
High	EmEHNTVcAAGtSPVGEIGEEK	1	1	1	P18583	M2(Oxidation); C8(Carbamidomethyl); T12(Phospho)	0	T(6): 0.0; T(12): 2.1; S(13): 97.9	2.50635e+07	0	3.203e-05	17.24	0.586221	3	2441	0.407732	15.7738	0
High	EMEHNTVcAAGtSPVGEIGEEK	3	1	1	P18583	C8(Carbamidomethyl); T12(Phospho)	0	T(6): 0.0; T(12): 1.8; S(13): 98.2	2.59054e+07	0	1.035e-10	57.61	5.66954e-05	3	2425.01	1.661	16.9304	0
High	TQMAEVLPsPR	1	1	1	P11388	S9(Phospho)	0	T(1): 0.0; S(9): 100.0	1.28839e+07	0	2.416e-06	64.44	6.92517e-06	2	1308.6	0.949595	20.4076	0
High	IKNENTEGsPQEDGVELEGLK	4	1	1	P11388	S9(Phospho)	0	T(6): 0.0; S(9): 100.0	1.52678e+07	0	1.024e-05	24.65	0.122197	3	2366.08	0.77414	17.8415	1
High	SVVsDLEADDVK	1	1	1	P11388	S4(Phospho)	0	S(1): 0.0; S(4): 100.0	1.9644e+07	0	9.591e-06	56.58	3.83527e-05	2	1356.59	0.42255	24.5503	0
High	TQmAEVLPsPR	1	1	1	P11388	M3(Oxidation); S9(Phospho)	0	T(1): 0.0; S(9): 100.0	7.00327e+06	0	1.73e-08	53.66	9.55769e-05	2	1324.6	-0.199423	16.376	0
High	sYDVPPPPmEPDHPFYSNISK	1	2	1	P18669	S1(Phospho); M9(Oxidation)	0	S(1): 50.0; Y(2): 50.0; Y(16): 0.0; S(17): 0.0; S(20): 0.0	2.95889e+07	0	5.62e-05	13.04	1.66607	3	2513.07	-1.7013	22.9382	0
High	sYDVPPPPMEPDHPFYSNISK	1	2	1	P18669	S1(Phospho)	0	S(1): 50.0; Y(2): 50.0; Y(16): 0.0; S(17): 0.0; S(20): 0.0	5.96226e+07	0	1.315e-09	30.33	0.0333659	3	2497.08	1.92211	25.3137	0
High	HTGPNsPDTANDGFVR	2	2	1	P31943	S6(Phospho)	0	T(2): 0.0; S(6): 100.0; T(9): 0.0	4.36113e+07	0	1.435e-08	64.08	8.03178e-06	3	1764.73	-0.688038	12.1993	0
High	PSGEAFVELEsEDEVK	1	1	1	P31943	S11(Phospho)	0	S(2): 0.0; S(11): 100.0	5.18107e+06	0	1.688e-05	36.62	0.00577093	2	1844.79	1.79678	24.2606	0
High	GLAGPPAsPGK	1	1	1	Q9P206	S8(Phospho)	0	S(8): 100.0	11848547	0	0.001161	32.93	0.00832756	2	1031.49	0.0317974	12.3573	0
High	FSSVSsPQPR	2	1	1	Q9P206	S6(Phospho)	0	S(2): 0.0; S(3): 0.0; S(5): 0.0; S(6): 100.0	3.53381e+06	0	3.278e-07	54.34	6.29501e-05	2	1171.51	-0.0362562	11.8999	0
High	DQsPPPsPPPSYHPPPPPTK	1	1	1	Q9P206	S3(Phospho); S7(Phospho)	0	S(3): 100.0; S(7): 99.9; S(11): 0.0; Y(12): 0.0; T(19): 0.0	2.18901e+07	0	4.042e-06	18.22	0.500947	3	2279.98	-0.411269	18.4887	0
High	GsPSGGSTAEASDTLSIR	1	1	1	Q9P206	S2(Phospho)	0	S(2): 100.0; S(4): 0.0; S(7): 0.0; T(8): 0.0; S(12): 0.0; T(14): 0.0; S(16): 0.0	4.38775e+06	0	7.184e-10	92.1	1.61548e-08	2	1772.77	-1.56527	18.3873	0
High	KLSVPtsDEEDEVPAPKPR	1	1	1	Q8NE71	T6(Phospho); S7(Phospho)	0	S(3): 0.1; T(6): 100.0; S(7): 100.0	1.04547e+07	0	7.285e-05	14.33	1.23054	3	2254	0.00452875	17.6384	2
High	KLSVPtSDEEDEVPAPKPR	2	1	1	Q8NE71	T6(Phospho)	0	S(3): 0.0; T(6): 50.0; S(7): 50.0	1.95125e+07	0	1.186e-07	35.13	0.00948328	3	2174.04	0.492269	15.6106	2
High	LSVPtsDEEDEVPAPKPR	1	1	1	Q8NE71	T5(Phospho); S6(Phospho)	0	S(2): 0.0; T(5): 100.0; S(6): 100.0	3.26941e+07	0.001	0.005249	19.25	0.351202	2	2125.92	4.05891	21.3375	1
High	LSVPTsDEEDEVPAPKPR	2	1	1	Q8NE71	S6(Phospho)	0	S(2): 0.0; T(5): 0.0; S(6): 100.0	4.81259e+07	0	3.613e-05	43.97	0.00128879	2	2045.95	1.18563	18.5234	1
High	KAEQGsEEEGEGEEEEEEGGESKADDPYAHLSK	1	1	1	Q8NE71	S6(Phospho)	0	S(6): 100.0; S(22): 0.0; Y(28): 0.0; S(32): 0.0	1.07818e+07	0	1.517e-08	25.81	0.0843686	4	3659.47	0.083988	12.0755	2
High	QQPPEPEWIGDGESTsPSDK	1	1	1	Q8NE71	S16(Phospho)	0	S(14): 0.0; T(15): 0.0; S(16): 98.7; S(18): 1.3	3.63901e+07	0	2.744e-05	34.81	0.00934946	2	2263.94	2.08175	22.4508	0
High	LQEDPNYsPQR	1	1	1	P46379	S8(Phospho)	0	Y(7): 0.0; S(8): 100.0	5.45169e+06	0	2.739e-05	47.72	0.000273006	2	1426.6	1.71752	12.5477	0
High	ENAsPAPGTTAEEAmSR	1	1	1	P46379	S4(Phospho); M15(Oxidation)	0	S(4): 100.0; T(9): 0.0; T(10): 0.0; S(16): 0.0	1.04354e+07	0	6.252e-08	56.23	4.89567e-05	2	1814.73	1.89374	11.7178	0
High	PLTsPESLSR	1	1	1	P46379	S4(Phospho)	0	T(3): 0.0; S(4): 49.6; S(7): 0.8; S(9): 49.6	7376236	0.001	0.01078	16.65	0.428218	2	1166.55	0.203614	16.7436	0
High	ENAsPAPGTTAEEAMSR	1	1	1	P46379	S4(Phospho)	0	S(4): 100.0; T(9): 0.0; T(10): 0.0; S(16): 0.0	1.96679e+07	0	5.39e-09	78.16	3.37592e-07	2	1798.73	1.79817	16.004	0
High	APPQTHLPSGASSGTGSASATHGGGsPPGTR	1	1	1	P46379	S26(Phospho)	0	T(5): 0.0; S(9): 0.0; S(12): 0.0; S(13): 0.0; T(15): 0.0; S(17): 0.0; S(19): 0.0; T(21): 0.0; S(26): 98.2; T(30): 1.8	5.33324e+07	0	1.266e-06	16.79	0.847068	3	2865.31	5.24421	10.9152	0
High	AsPEPQRENAsPAPGTTAEEAMSR	1	1	1	P46379	S2(Phospho); S11(Phospho)	0	S(2): 100.0; S(11): 97.6; T(16): 2.3; T(17): 0.1; S(23): 0.0	3.99876e+06	0	0.001036	20.91	0.215716	3	2644.08	2.71929	16.6609	1
High	VGDPPQPLPEEPmEVQGAERAsPEPQR	1	1	1	P46379	M13(Oxidation); S22(Phospho)	0	S(22): 100.0	1.2355e+07	0	9.103e-07	15.57	1.06911	3	3036.39	2.9417	19.0158	1
High	VALsDDETKETENmR	1	1	1	Q15054	S4(Phospho); M14(Oxidation)	0	S(4): 100.0; T(8): 0.0; T(11): 0.0	1.11849e+07	0	3.513e-05	53.3	0.000108515	2	1833.76	2.43164	11.0331	1
High	VALsDDETKETENMR	2	1	1	Q15054	S4(Phospho)	0	S(4): 100.0; T(8): 0.0; T(11): 0.0	1.91903e+07	0	1.856e-09	95.24	6.89717e-09	2	1817.77	4.02065	13.4696	1
High	VADAKGDsEsEEDEDLEVPVPSR	2	1	1	P13861	S8(Phospho); S10(Phospho)	0	S(8): 100.0; S(10): 100.0; S(22): 0.0	7.13956e+07	0	4.909e-08	32.48	0.0151403	3	2633.05	-1.32623	23.7508	1
High	GDsEsEEDEDLEVPVPSR	1	1	1	P13861	S3(Phospho); S5(Phospho)	0	S(3): 100.0; S(5): 100.0; S(17): 0.0	56763257	0	1.896e-07	60.27	1.3438e-05	2	2148.79	1.87144	29.6101	0
High	RVsVcAETYNPDEEEEDTDPR	3	1	1	P13861	S3(Phospho); C5(Carbamidomethyl)	0	S(3): 100.0; T(8): 0.0; Y(9): 0.0; T(18): 0.0	1.14003e+08	0	3.439e-11	63.34	1.08447e-05	3	2591.02	-1.14434	16.2062	1
High	AIGGIILTAsHNPGGPNGDFGIK	1	1	1	P36871	S10(Phospho)	0	T(8): 1.0; S(10): 99.0	2.97148e+07	0	5.653e-14	83.25	1.22073e-07	2	2286.14	5.46168	25.8302	0
High	TIsDGTISASK	1	1	1	Q5T0N5	S3(Phospho)	0	T(1): 0.0; S(3): 100.0; T(6): 0.0; S(8): 0.0; S(10): 0.0	3.88812e+06	0	2.705e-06	63.59	8.53168e-06	2	1159.53	1.00552	13.6879	0
High	EsPEGSYTDDANQEVR	1	1	1	Q5T0N5	S2(Phospho)	0	S(2): 100.0; S(6): 0.0; Y(7): 0.0; T(8): 0.0	4.4564e+06	0	1.53e-09	92.06	1.08903e-08	2	1876.73	2.45671	14.5554	0
High	RQsPLPPQK	2	1	1	Q01105	S3(Phospho)	0	S(3): 100.0	6.47364e+07	0.001	0.01361	34.03	0.00597004	2	1130.57	0.749297	6.08102	1
High	AtSNVFAmFDQSQIQEFK	2	3	1	P19105	T2(Phospho); M8(Oxidation)	0	T(2): 50.0; S(3): 50.0; S(12): 0.0	6.39289e+06	0	2.265e-05	36.73	0.00690054	2	2186.95	2.71285	30.5295	0
High	ATsNVFAMFDQSQIQEFK	2	3	1	P19105	S3(Phospho)	0	T(2): 0.0; S(3): 100.0; S(12): 0.0	1.20668e+08	0	8.61e-10	74.3	1.14061e-06	2	2170.96	1.96496	35.1291	0
High	GDSIEEILADsEDEEDNEEEER	3	1	1	Q5JTH9	S11(Phospho)	0	S(3): 1.5; S(11): 98.5	3.30984e+07	0	6.726e-10	58.34	2.72592e-05	2	2631.99	-2.81852	27.1663	0
High	YsPPAISPLVSEK	1	1	1	Q14694	S2(Phospho)	0	Y(1): 50.0; S(2): 50.0; S(7): 0.0; S(11): 0.0	1.10594e+07	0	4.64e-06	44.58	0.000809884	2	1467.71	0.193638	25.4945	0
High	NHSVNEEEQEEQGEGsEDEWEQVGPR	1	1	1	Q14694	S16(Phospho)	0	S(3): 0.0; S(16): 100.0	6.09019e+07	0	3.075e-18	110.4	2.55819e-10	3	3107.22	1.70342	17.2059	0
High	sGEGEVSGLMR	1	1	1	Q13263	S1(Phospho)	0	S(1): 100.0; S(7): 0.0	1.27703e+06	0	1.166e-05	52.41	7.14775e-05	2	1201.49	0.743367	18.2778	0
High	aASAAAASAAAASAASGsPGPGEGSAGGEK	2	1	1	Q13263	N-Term(Acetyl); S18(Phospho)	0	S(3): 0.0; S(8): 0.0; S(13): 0.0; S(16): 0.0; S(18): 100.0; S(25): 0.0	2.7826e+08	0	1.367e-13	58.7	4.73486e-05	3	2509.09	1.14778	24.3475	0
High	aASAAAASAAAASAAsGSPGPGEGSAGGEKR	3	1	1	Q13263	N-Term(Acetyl); S16(Phospho)	0	S(3): 0.0; S(8): 0.0; S(13): 0.8; S(16): 33.1; S(18): 33.1; S(25): 33.1	8.60686e+07	0	4.639e-09	39.07	0.00474459	3	2665.19	2.43743	20.1638	1
High	SLsTSGESLYHVLGLDK	6	1	1	Q9H3Z4	S3(Phospho)	0	S(1): 0.0; S(3): 100.0; T(4): 0.0; S(5): 0.0; S(8): 0.0; Y(10): 0.0	6.74665e+07	0	2.654e-14	109.33	3.44209e-10	2	1885.9	1.2152	29.1287	0
High	aTTATMATsGSAR	2	1	1	P38919	N-Term(Acetyl); S9(Phospho)	0.0143	T(2): 0.0; T(3): 0.0; T(5): 0.0; T(8): 0.9; S(9): 99.1; S(11): 0.0	9.96254e+06	0	1.344e-06	68.65	2.19698e-06	2	1347.56	1.35542	18.4465	0
High	aTTATmATSGsAR	1	1	1	P38919	N-Term(Acetyl); M6(Oxidation); S11(Phospho)	0	T(2): 0.0; T(3): 0.0; T(5): 0.0; T(8): 0.0; S(9): 50.0; S(11): 50.0	7.07812e+06	0	4.662e-06	52.43	9.17223e-05	2	1363.56	1.84589	13.9307	0
High	SGGLQtPEcLsREGsPIPHDPEFGSK	1	1	1	P85037	T6(Phospho); C9(Carbamidomethyl); S11(Phospho); S15(Phospho)	0	S(1): 0.1; T(6): 99.9; S(11): 100.0; S(15): 100.0; S(25): 0.0	7.72569e+06	0.001	0.005921	12.47	1.76384	3	3022.22	4.54177	24.3384	1
High	SGGLQtPEcLsR	1	1	1	P85037	T6(Phospho); C9(Carbamidomethyl); S11(Phospho)	0	S(1): 0.0; T(6): 100.0; S(11): 100.0	9.55288e+06	0	0.000822	47.04	0.000218455	2	1464.56	-0.0271347	19.0279	0
High	EEAPAsPLRPLYPQIsPLK	1	1	1	P85037	S6(Phospho); S16(Phospho)	0	S(6): 97.3; Y(12): 2.7; S(16): 100.0	1.91039e+07	0.002	0.02571	26.16	0.0709362	2	2266.1	4.40187	30.6867	1
High	EEAPAsPLRPLYPQISPLK	1	1	1	P85037	S6(Phospho)	0	S(6): 100.0; Y(12): 0.0; S(16): 0.0	7.53273e+06	0	0.0004687	22.94	0.0914687	2	2186.13	1.89289	27.0005	1
High	EGsPIPHDPEFGSK	2	1	1	P85037	S3(Phospho)	0	S(3): 100.0; S(13): 0.0	37569426	0	2.087e-08	59	2.48638e-05	2	1576.67	1.09283	15.993	0
High	sAPAsPTHPGLmSPR	1	1	1	P85037	S1(Phospho); S5(Phospho); M12(Oxidation)	0	S(1): 100.0; S(5): 100.0; T(7): 0.0; S(13): 0.0	1.0904e+07	0.005	0.06908	14.12	0.772579	2	1681.68	-1.73541	14.6974	0
High	sAPAsPTHPGLMSPR	1	1	1	P85037	S1(Phospho); S5(Phospho)	0	S(1): 100.0; S(5): 100.0; T(7): 0.0; S(13): 0.0	1.27119e+07	0	1.478e-08	68.87	2.65922e-06	2	1665.69	3.03665	17.9256	0
High	SSVKTPEtVVPTAPELQASASTDQPVTSEPTSR	1	1	1	Q14676	T8(Phospho)	0	S(1): 25.0; S(2): 25.0; T(5): 25.0; T(8): 25.0; T(12): 0.0; S(19): 0.0; S(21): 0.0; T(22): 0.0; T(27): 0.0; S(28): 0.0; T(31): 0.0; S(32): 0.0	9.86506e+06	0	1.343e-07	39.82	0.00368459	3	3477.66	-2.1668	22.8934	1
High	LLLAEDsEEEVDFLSER	2	1	1	Q14676	S7(Phospho)	0	S(7): 100.0; S(15): 0.0	4.91456e+07	0	2.437e-08	76.31	7.70647e-07	2	2073.93	2.26991	33.0285	0
High	AHsEKDQPPFGDSDDSVEADK	1	1	1	Q14676	S3(Phospho)	0	S(3): 100.0; S(13): 0.0; S(16): 0.0	4.73115e+06	0	3.642e-06	23.24	0.122117	3	2353.95	0.354747	12.4693	1
High	AIPGDQHPEsPVHTEPMGIQGR	1	1	1	Q14676	S10(Phospho)	0	S(10): 100.0; T(14): 0.0	4.0738e+07	0	9.852e-06	13.51	1.64893	3	2433.11	1.34534	15.1002	0
High	sLATMDSPPHQK	1	1	1	Q14676	S1(Phospho)	0	S(1): 100.0; T(4): 0.0; S(7): 0.0	3.99312e+06	0	2.173e-06	46.16	0.0004951	2	1391.6	1.34048	11.0628	0
High	ELLDTsFEDLSKPK	1	1	1	P78345	S6(Phospho)	0	T(5): 0.0; S(6): 100.0; S(11): 0.0	8.57729e+06	0	4.999e-10	92.89	1.33394e-08	2	1701.8	-0.840113	23.8461	1
High	EPAITSQNsPEAR	1	1	1	P23193	S9(Phospho)	0	T(5): 0.0; S(6): 0.0; S(9): 100.0	4.16143e+07	0	8.133e-08	63.25	1.01728e-05	2	1479.65	1.42838	11.8529	0
High	KKEPAITSQNsPEAR	2	1	1	P23193	S11(Phospho)	0	T(7): 0.0; S(8): 0.6; S(11): 99.4	9.84589e+07	0	6.749e-08	53.44	0.000112998	2	1735.84	2.27323	6.2467	2
High	KEPAITSQNsPEAR	2	1	1	P23193	S10(Phospho)	0	T(6): 0.0; S(7): 0.9; S(10): 99.1	2.75975e+06	0	0.0001992	26.58	0.0556059	2	1607.74	0.859455	8.23594	1
High	AGEPNsPDAEEANsPDVTAGcDPAGVHPPR	1	1	1	Q08J23	S6(Phospho); S14(Phospho); C21(Carbamidomethyl)	0	S(6): 100.0; S(14): 100.0; T(18): 0.0	3.41087e+08	0	1.002e-11	24.96	0.0978206	3	3174.26	1.93617	20.1732	0
High	AGEPNsPDAEEANSPDVTAGcDPAGVHPPR	1	1	1	Q08J23	S6(Phospho); C21(Carbamidomethyl)	0	S(6): 100.0; S(14): 0.0; T(18): 0.0	2.09591e+08	0	7.166e-13	23.39	0.180508	3	3094.29	2.0329	17.9669	0
High	ESTQLsPADLTEGKPTDPSK	3	1	1	Q08J23	S6(Phospho)	0	S(2): 0.0; T(3): 1.3; S(6): 98.7; T(11): 0.0; T(16): 0.0; S(19): 0.0	3.28e+07	0	2.651e-07	52.37	0.000177015	2	2181	3.44028	18.3118	1
High	SGLTVPtSPK	1	1	1	Q53EL6	T7(Phospho)	0	S(1): 0.0; T(4): 0.0; T(7): 0.0; S(8): 100.0	8.86997e+07	0.001	0.009384	26.62	0.0375655	2	1066.52	0.391851	16.1371	0
High	DSGRGDsVSDSGSDALR	2	1	1	Q53EL6	S7(Phospho)	0	S(2): 0.0; S(7): 100.0; S(9): 0.0; S(11): 0.0; S(13): 0.0	2.30124e+07	0	2.684e-09	53.6	8.3811e-05	2	1760.71	1.13162	11.0577	1
High	FVsEGDGGR	1	1	1	Q53EL6	S3(Phospho)	0	S(3): 100.0	3.65669e+07	0	0.002361	42.63	0.000382031	2	1003.39	0.595157	9.78652	0
High	IAsPVSR	1	1	1	P09884	S3(Phospho)	0	S(3): 100.0; S(6): 0.0	1.96886e+06	0.007	0.08006	33.82	0.00468898	2	809.392	-0.178126	9.1961	0
High	ALSSDSILsPAPDAR	4	1	1	Q8IVT2	S9(Phospho)	0	S(3): 0.0; S(4): 0.0; S(6): 0.0; S(9): 100.0	5.3069e+06	0	3.619e-08	60.65	2.10943e-05	2	1579.74	0.743242	22.4792	0
High	HLsESSGKPLSTK	2	1	1	Q8IVT2	S3(Phospho)	0	S(3): 100.0; S(5): 0.0; S(6): 0.0; S(11): 0.0; T(12): 0.0	3.90953e+06	0	6.861e-08	78.29	3.24671e-07	2	1450.7	2.08358	6.39062	1
High	KsSTVATLQGTPDHGDPR	3	1	1	Q8IVT2	S2(Phospho)	0	S(2): 33.0; S(3): 33.0; T(4): 33.0; T(7): 0.5; T(11): 0.5	7.16058e+06	0.001	0.005196	17.5	0.543264	2	1946.9	0.781103	9.92201	1
High	sPVGSGAPQAAAPAPAAHVAGNPGGDAAPAATGTAAAASLATAAGSEDAEKK	1	1	1	P16989	S1(Phospho)	0	S(1): 100.0; S(5): 0.0; T(32): 0.0; T(34): 0.0; S(39): 0.0; T(42): 0.0; S(46): 0.0	1.8755e+07	0	1.572e-12	32.36	0.0171906	5	4587.18	1.95216	22.089	1
High	EAEQAASEAAGGDttPGSSPSSLYYEEPLGQPPR	7	1	1	Q86TC9	T14(Phospho); T15(Phospho)	0	S(7): 24.9; T(14): 24.9; T(15): 24.9; S(18): 24.9; S(19): 24.9; S(21): 24.9; S(22): 24.9; Y(24): 24.9; Y(25): 1.1	1.96841e+07	0	6.028e-06	31.2	0.0278398	3	3609.5	1.52313	31.3708	0
High	TPEPSsPVKEPPPVLAK	4	1	1	Q86TC9	S6(Phospho)	0	T(1): 0.0; S(5): 1.0; S(6): 99.0	3.3534e+07	0	3.031e-08	39.38	0.00242802	2	1852.95	-0.118801	16.9531	1
High	TPEPSsPVKEPPPVLAKPK	2	1	1	Q86TC9	S6(Phospho)	0	T(1): 0.0; S(5): 1.4; S(6): 98.6	1.93394e+07	0	1.093e-09	39.43	0.00179019	3	2078.1	1.39807	14.4238	2
High	TPVDEsDDEIQHDEIPTGK	2	1	1	Q86TC9	S6(Phospho)	0	T(1): 0.0; S(6): 100.0; T(17): 0.0	3.67949e+07	0	1.596e-09	49.61	0.000309043	3	2204.93	1.52183	16.8737	0
High	RLsPDQMK	1	1	1	Q86TC9	S3(Phospho)	0	S(3): 100.0	4.08121e+06	0.004	0.06059	31	0.0143773	2	1054.48	1.83606	8.20478	1
High	cVSPIPVsPTSR	1	1	1	Q86TC9	C1(Carbamidomethyl); S8(Phospho)	0	S(3): 0.0; S(8): 100.0; T(10): 0.0; S(11): 0.0	9.71289e+06	0	9.227e-05	34.4	0.0074431	2	1379.64	0.639157	20.4488	0
High	NTFTAWSDEESDyEIDDRDVNK	3	1	1	Q6PKG0	Y13(Phospho)	0	T(2): 0.0; T(4): 0.0; S(7): 33.3; S(11): 33.3; Y(13): 33.3	5.30867e+06	0.001	0.003363	16.37	0.628589	3	2729.09	-0.172699	23.5092	1
High	NALPPVLtTVNGQSPPEHSAPAK	3	1	1	Q6PKG0	T8(Phospho)	0	T(8): 33.3; T(9): 33.3; S(14): 33.3; S(19): 0.0	1.27643e+07	0	9.292e-05	10.17	2.70694	3	2405.19	1.93654	21.2107	0
High	SLPTTVPEsPNYR	2	1	1	Q6PKG0	S9(Phospho)	0	S(1): 0.0; T(4): 0.0; T(5): 0.0; S(9): 100.0; Y(12): 0.0	40223605	0	0.0009393	22.88	0.128807	2	1540.71	0.653963	19.4366	0
High	ETESAPGsPR	1	1	1	Q6PKG0	S8(Phospho)	0	T(2): 0.0; S(4): 0.0; S(8): 100.0	1.61364e+06	0	0.0008843	38.79	0.0012288	2	1110.45	0.636485	6.84471	0
High	HSsNPPLESHVGWVmDSR	1	1	1	Q6PKG0	S3(Phospho); M15(Oxidation)	0	S(2): 1.2; S(3): 97.6; S(9): 1.2; S(17): 0.0	1.01386e+07	0	0.001621	13.75	1.21027	3	2130.91	0.247408	15.8692	0
High	GLsASLPDLDSENWIEVK	1	1	1	Q6PKG0	S3(Phospho)	0	S(3): 100.0; S(5): 0.0; S(11): 0.0	31226748	0	8.643e-06	29.54	0.0364092	2	2052.96	2.16105	34.0062	0
High	HSsNPPLESHVGWVMDSR	2	1	1	Q6PKG0	S3(Phospho)	0	S(2): 1.1; S(3): 98.9; S(9): 0.0; S(17): 0.0	1.31079e+07	0	5.221e-06	39.38	0.00326427	3	2114.91	-0.394651	18.9261	0
High	sLPTTVPEsPNYR	1	1	1	Q6PKG0	S1(Phospho); S9(Phospho)	0	S(1): 100.0; T(4): 0.0; T(5): 0.0; S(9): 99.1; Y(12): 0.9	5.69798e+07	0	1.773e-05	45.34	0.000590679	2	1620.68	2.71685	24.896	0
High	DSDQVAQsDGEESPAAEEQLLGEHIK	1	1	1	O94979	S8(Phospho)	0	S(2): 0.0; S(8): 98.4; S(13): 1.6	1.78894e+07	0	4.336e-11	68.34	5.68633e-06	3	2862.24	1.72242	23.8008	0
High	EQTLsPTITSGLHNIAR	2	1	1	O94979	S5(Phospho)	0	T(3): 0.0; S(5): 50.0; T(7): 50.0; T(9): 0.0; S(10): 0.0	4.39206e+06	0	1.114e-09	73.16	1.15693e-06	2	1917.95	1.33056	22.3645	0
High	AQGEPVAGHEsPK	1	1	1	O94979	S11(Phospho)	0	S(11): 100.0	9.58854e+06	0	0.0001317	32.8	0.00947277	2	1386.61	0.370725	6.18725	0
High	AQGEPVAGHEsPKIPYEK	2	1	1	O94979	S11(Phospho)	0	S(11): 100.0; Y(16): 0.0	8.22794e+07	0	3.159e-05	19.22	0.323718	3	2016.94	-0.247127	12.5221	1
High	YQtQPVTLGEVEQVQSGK	1	1	1	O95425	T3(Phospho)	0	Y(1): 0.8; T(3): 99.2; T(7): 0.0; S(16): 0.0	9.62877e+06	0	3.999e-09	72.2	1.7414e-06	2	2070.98	3.41896	23.404	0
High	QAHDLsPAAESSSTFSFSGR	1	1	1	O95425	S6(Phospho)	0	S(6): 100.0; S(11): 0.0; S(12): 0.0; S(13): 0.0; T(14): 0.0; S(16): 0.0; S(18): 0.0	4.37698e+06	0	0.0002966	28.31	0.0430906	3	2161.92	0.692841	19.6257	0
High	DSSFTEVPRsPK	1	1	1	O95425	S10(Phospho)	0	S(2): 0.0; S(3): 0.0; T(5): 0.0; S(10): 100.0	1.48758e+07	0	2.279e-07	57.43	3.73181e-05	2	1429.64	1.41627	13.9156	1
High	SPSFGDPQLsPEAR	1	1	1	O95425	S10(Phospho)	0	S(1): 0.0; S(3): 0.0; S(10): 100.0	3.74961e+06	0	0.0001356	34.05	0.0092681	2	1567.68	0.998431	20.5239	0
High	cTsHSETPTVDDEEKVDER	5	1	1	O95425	C1(Carbamidomethyl); S3(Phospho)	0	T(2): 20.0; S(3): 20.0; S(5): 20.0; T(7): 20.0; T(9): 20.0	1.72843e+06	0.002	0.02829	14.36	0.86296	3	2313.92	2.33568	10.3286	1
High	FLESAAADFsDEDEDDDVDGR	1	1	1	O43815	S10(Phospho)	0	S(4): 0.0; S(10): 100.0	1.3019e+07	0	2.393e-14	120.53	1.32767e-11	2	2397.89	-1.21146	25.6017	0
High	SGGSGHAVAEPAsPEQELDQNK	2	1	1	P46013	S13(Phospho)	0	S(1): 0.0; S(4): 0.0; S(13): 100.0	8.03599e+06	0	5.07e-11	62.63	1.68912e-05	3	2287.99	2.65841	13.6316	0
High	AQSLVISPPAPsPR	1	1	1	P46013	S12(Phospho)	0	S(3): 0.0; S(7): 0.0; S(12): 100.0	8.29411e+06	0	8.486e-08	56.39	4.87932e-05	2	1499.76	0.844682	22.9175	0
High	MPcESsPPESADTPTSTR	1	1	1	P46013	C3(Carbamidomethyl); S6(Phospho)	0	S(5): 1.4; S(6): 98.6; S(10): 0.0; T(13): 0.0; T(15): 0.0; S(16): 0.0; T(17): 0.0	5.94756e+06	0	1.209e-06	40.1	0.00177369	2	2029.79	-0.634356	14.5605	0
High	IAcKsPPPESVDTPTSTK	1	1	1	P46013	C3(Carbamidomethyl); S5(Phospho)	0	S(5): 100.0; S(10): 0.0; T(13): 0.0; T(15): 0.0; S(16): 0.0; T(17): 0.0	5.96038e+06	0	9.89e-05	19.59	0.360474	3	1994.92	0.439056	11.7739	1
High	SGSSsPDSEITELK	1	1	1	P17812	S5(Phospho)	0	S(1): 0.0; S(3): 0.0; S(4): 0.0; S(5): 100.0; S(8): 0.0; T(11): 0.0	3.42189e+07	0	5.986e-08	78.31	2.76695e-07	2	1516.64	-1.43243	18.5275	0
High	SGSssPDSEITELK	1	1	1	P17812	S4(Phospho); S5(Phospho)	0	S(1): 0.0; S(3): 0.0; S(4): 100.0; S(5): 100.0; S(8): 0.1; T(11): 0.0	6.04697e+06	0	1.648e-05	47.55	0.000230288	2	1596.61	1.30124	24.622	0
High	SGSsSPDSEITELKFPSINHD	6	1	1	P17812	S4(Phospho)	0	S(1): 0.6; S(3): 33.1; S(4): 33.1; S(5): 33.1; S(8): 0.0; T(11): 0.0; S(17): 0.0	1.28426e+07	0	4.537e-06	21.56	0.218547	3	2327.01	0.69064	26.412	1
High	SQDAtFSPGSEQAEKsPGPIVSR	2	1	1	Q86WB0	T5(Phospho); S16(Phospho)	0	S(1): 0.0; T(5): 50.0; S(7): 50.0; S(10): 0.1; S(16): 99.9; S(22): 0.0	7.03933e+06	0	2.373e-05	13.42	1.47644	3	2535.08	0.449155	20.0092	1
High	LPLVPEsPR	1	1	1	Q86WB0	S7(Phospho)	0	S(7): 100.0	3.89246e+06	0	0.0003697	37.77	0.00340067	2	1087.56	0.284132	21.9448	0
High	LPLVPEsPRR	1	1	1	Q86WB0	S7(Phospho)	0	S(7): 100.0	2.19184e+07	0.001	0.00682	26.91	0.0367686	2	1243.66	-0.0828063	16.1531	1
High	SQDATFsPGSEQAEK	1	1	1	Q86WB0	S7(Phospho)	0	S(1): 0.0; T(5): 0.0; S(7): 100.0; S(10): 0.0	4.20852e+06	0	1.03e-09	64.01	7.05015e-06	2	1661.67	0.362908	13.3773	0
High	SMGTGDTPGLEVPSsPLRK	1	1	1	Q86WB0	S15(Phospho)	0	S(1): 0.0; T(4): 0.0; T(7): 0.0; S(14): 0.0; S(15): 100.0	8.85863e+06	0	8.416e-08	19.42	0.366293	3	2008.94	0.380456	20.3876	1
High	SmGTGDTPGLEVPSsPLRK	2	1	1	Q86WB0	M2(Oxidation); S15(Phospho)	0	S(1): 0.0; T(4): 0.0; T(7): 0.0; S(14): 0.0; S(15): 100.0	4.01975e+06	0	4.322e-05	19.62	0.348169	3	2024.94	0.597866	18.6955	1
High	LcsSSSSDTSSR	1	1	1	Q86WB0	C2(Carbamidomethyl); S3(Phospho)	0	S(3): 99.1; S(4): 0.9; S(5): 0.0; S(6): 0.0; S(7): 0.0; T(9): 0.0; S(10): 0.0; S(11): 0.0	5.26874e+06	0	6.761e-07	65.44	2.70042e-06	2	1353.5	4.21713	6.36419	0
High	AHSSPASLQLGAVSPGtLTPTGVVSGPAATPTAQHLR	6	1	1	P46937	T17(Phospho)	0	S(3): 1.2; S(4): 1.2; S(7): 0.0; S(14): 1.2; T(17): 48.2; T(19): 48.2; T(21): 0.0; S(25): 0.0; T(30): 0.0; T(32): 0.0	1.34041e+07	0	1.381e-08	35.75	0.00450993	3	3614.84	0.857111	25.2199	0
High	QAsTDAGTAGALTPQHVR	4	1	1	P46937	S3(Phospho)	0	S(3): 99.1; T(4): 0.9; T(8): 0.0; T(13): 0.0	8.26107e+06	0	7.195e-12	92.72	1.50747e-08	2	1860.87	4.05134	13.1227	0
High	SASQSsLDKLDQELK	1	1	1	O60271	S6(Phospho)	0	S(1): 0.0; S(3): 0.0; S(5): 50.0; S(6): 50.0	1.37695e+07	0	3.581e-09	72.83	1.59486e-06	2	1728.81	1.62464	17.5185	1
High	VSNsPEPQK	1	1	1	O60271	S4(Phospho)	0	S(2): 0.0; S(4): 100.0	1.03959e+06	0	0.001906	28.35	0.0157915	2	1065.46	-0.384126	5.83752	0
High	SAsQSsLDKLDQELK	2	1	1	O60271	S3(Phospho); S6(Phospho)	0	S(1): 0.0; S(3): 100.0; S(5): 0.0; S(6): 100.0	1.77878e+07	0	8.933e-09	68.71	3.99721e-06	2	1808.77	1.20299	22.2167	1
High	SLTDPSQESHTEAIsDAETSSSDISFSGIATR	4	1	1	Q5QJE6	S15(Phospho)	0	S(1): 0.0; T(3): 0.0; S(6): 0.0; S(9): 0.0; T(11): 0.0; S(15): 98.2; T(19): 1.7; S(20): 0.0; S(21): 0.0; S(22): 0.0; S(25): 0.0; S(27): 0.0; T(31): 0.0	2.70397e+07	0	1.564e-11	73.41	1.84467e-06	3	3406.49	3.17863	25.4388	0
High	QILIAcsPVSSVR	1	1	1	Q5QJE6	C6(Carbamidomethyl); S7(Phospho)	0	S(7): 100.0; S(10): 0.0; S(11): 0.0	1.33244e+07	0	2.303e-08	67.09	4.42658e-06	2	1509.75	0.567981	23.5473	0
High	QPtPPFFGR	2	1	1	Q96PK6	T3(Phospho)	0	T(3): 100.0	6.06498e+07	0	0.00148	36.76	0.00380607	2	1126.51	0.698114	23.8679	0
High	AQPSAsLGVGYR	1	1	1	Q96PK6	S6(Phospho)	0	S(4): 0.9; S(6): 99.1; Y(11): 0.0	4.59887e+06	0	5.59e-05	46.68	0.000420975	2	1285.59	0.461716	17.5163	0
High	AQPSVsLGAPYR	1	1	1	Q96PK6	S6(Phospho)	0	S(4): 0.8; S(6): 99.2; Y(11): 0.0	2.58021e+06	0	9.097e-06	50.06	0.000222406	2	1325.63	1.51507	19.9298	0
High	RLsESQLSFR	1	1	1	Q96PK6	S3(Phospho)	0	S(3): 100.0; S(5): 0.0; S(8): 0.0	2.23385e+07	0	2.458e-05	49.48	0.000240093	2	1302.62	1.90843	15.7197	1
High	TYsDEANQMR	1	1	1	Q9BXF6	S3(Phospho)	0	T(1): 0.0; Y(2): 0.0; S(3): 100.0	4.70286e+06	0	1.827e-05	43.72	0.000397019	2	1294.48	0.262825	12.3865	0
High	SNsSSEAVLGQEELSAQAK	4	1	1	Q9BXF6	S3(Phospho)	0	S(1): 0.7; S(3): 99.3; S(4): 0.0; S(5): 0.0; S(15): 0.0	7.24417e+06	0	6.992e-12	97.98	4.84031e-09	2	2014.9	0.0405699	20.4598	0
High	KGsITEYTAAEEK	1	1	1	Q12982	S3(Phospho)	0	S(3): 100.0; T(5): 0.0; Y(7): 0.0; T(8): 0.0	3.06487e+07	0	2.661e-13	116.34	5.56295e-11	2	1506.67	0.815892	11.3881	1
High	AKsPQPPVEEEDEHFDDTVVcLDTYNcDLHFK	3	1	1	Q00839	S3(Phospho); C21(Carbamidomethyl); C27(Carbamidomethyl)	0	S(3): 100.0; T(18): 0.0; T(24): 0.0; Y(25): 0.0	2.0441e+08	0	1.145e-11	52.88	0.000197848	4	3914.65	-1.09385	24.6494	1
High	sSsPVNVK	1	1	1	Q00839	N-Term(Acetyl); S3(Phospho)	0	S(1): 0.0; S(2): 50.0; S(3): 50.0	1.73848e+08	0	0.0008928	65.82	2.31709e-06	2	939.418	0.11315	15.078	0
High	LGVSVsPSR	1	1	1	Q86VM9	S6(Phospho)	0	S(4): 0.0; S(6): 0.7; S(8): 99.3	4.23087e+07	0	0.0004322	47.73	0.000246237	2	981.477	0.203641	14.9771	0
High	SSQQPsTPQQAPPGQPQQGTFVAHK	2	1	1	Q86VM9	S6(Phospho)	0	S(1): 0.0; S(2): 0.0; S(6): 50.0; T(7): 50.0; T(20): 0.0	1.00923e+07	0	6.469e-07	15.41	1.01428	3	2711.26	2.04381	13.7307	0
High	LGVsVsPSR	1	1	1	Q86VM9	S4(Phospho); S6(Phospho)	0	S(4): 100.0; S(6): 50.0; S(8): 50.0	6.85226e+06	0	0.003084	33.63	0.00468192	2	1061.44	1.08722	20.3052	0
High	LGsPKPER	1	1	1	Q86VM9	S3(Phospho)	0	S(3): 100.0	4.72059e+07	0.005	0.06329	38.03	0.0026679	2	963.466	-0.0449975	5.82871	1
High	YEPSDKDRQsPPPAK	1	1	1	Q86VM9	S10(Phospho)	0	Y(1): 0.0; S(4): 1.1; S(10): 98.9	4.76657e+07	0	0.0003974	10.32	2.341	3	1794.81	0.163915	6.11221	2
High	GYtSDSEVYTDHGR	2	1	1	Q92538	T3(Phospho)	0	Y(2): 0.6; T(3): 49.4; S(4): 49.4; S(6): 0.6; Y(9): 0.0; T(10): 0.0	5.12773e+06	0	4.359e-08	74.86	4.76818e-07	2	1666.64	1.16399	12.3086	0
High	GYTsDSEVYTDHGRPGK	3	1	1	Q92538	S4(Phospho)	0	Y(2): 0.0; T(3): 0.0; S(4): 98.5; S(6): 1.4; Y(9): 0.0; T(10): 0.0	5.16769e+07	0	1.054e-06	22.35	0.145235	3	1948.81	0.884052	10.7309	1
High	ADAPDAGAQsDSELPSYHQNDVSLDR	2	1	1	Q92538	S10(Phospho)	0	S(10): 50.0; S(12): 50.0; S(16): 0.0; Y(17): 0.0; S(23): 0.0	7.05431e+07	0	3.903e-11	37.79	0.00543936	3	2838.18	-0.207481	19.6145	0
High	EHQTSAYsPPR	1	1	1	Q96K21	S8(Phospho)	0	T(4): 1.3; S(5): 0.0; Y(7): 1.3; S(8): 97.3	5.96167e+06	0	0.001155	37.77	0.00278237	2	1352.56	1.12416	7.89447	0
High	LPDsDDDEDEETAIQR	1	1	1	Q96K21	S4(Phospho)	0	S(4): 100.0; T(12): 0.0	1.04138e+07	0	4.449e-15	101.44	1.28844e-09	2	1927.75	0.899967	17.7636	0
High	WsPPQNYK	1	1	1	Q96K21	S2(Phospho)	0	S(2): 100.0; Y(7): 0.0	1.16619e+07	0.005	0.06803	22.43	0.074578	2	1099.46	1.44402	16.1583	0
High	LGMLsPEGTcK	1	1	1	P49327	S5(Phospho); C10(Carbamidomethyl)	0	S(5): 100.0; T(9): 0.0	5.3269e+06	0	0.0001001	43.22	0.00076229	2	1272.54	1.50988	19.6016	0
High	LGmLsPEGTcK	1	1	1	P49327	M3(Oxidation); S5(Phospho); C10(Carbamidomethyl)	0	S(5): 100.0; T(9): 0.0	3.22532e+06	0	0.003224	16.53	0.299035	2	1288.53	-1.00456	14.3742	0
High	ADEASELAcPtPK	1	1	1	P49327	C9(Carbamidomethyl); T11(Phospho)	0	S(5): 0.0; T(11): 100.0	3.03284e+07	0	7.477e-07	67.79	2.71968e-06	2	1468.6	0.388609	15.414	0
High	tPPITTK	1	1	1	Q5T200	T1(Phospho)	0	T(1): 100.0; T(5): 0.0; T(6): 0.0	4.28715e+06	0	0.0008073	37.16	0.00227886	2	837.411	-0.512034	9.42161	0
High	FVHGPsPR	1	1	1	Q5T200	S6(Phospho)	0	S(6): 100.0	3.3029e+06	0.005	0.06271	27.02	0.0279046	2	976.441	0.467024	7.8506	0
High	TSAVSsPLLDQQR	1	1	1	Q5T200	S6(Phospho)	0	T(1): 0.0; S(2): 0.0; S(5): 0.0; S(6): 100.0	6.78608e+06	0	4.025e-08	53.92	0.000100161	2	1481.7	1.73701	17.8103	0
High	SKLsPsPSLR	1	1	1	Q5T200	S4(Phospho); S6(Phospho)	0	S(1): 0.0; S(4): 100.0; S(6): 100.0; S(8): 0.0	6.38347e+06	0.001	0.01114	25.07	0.0505654	2	1231.55	-0.202995	13.8646	1
High	EVsPEVVR	1	1	1	Q5T200	S3(Phospho)	0	S(3): 100.0	9.14073e+06	0.001	0.004922	39.1	0.00145787	2	994.461	0.312459	13.403	0
High	SLsPSHLTEDR	1	1	1	Q5T200	S3(Phospho)	0	S(1): 0.0; S(3): 100.0; S(5): 0.0; T(8): 0.0	1.90954e+07	0	0.0006301	55.84	4.76926e-05	2	1321.57	-2.78279	12.9309	0
High	RNsLTGEEGQLAR	3	1	1	Q9BX95	S3(Phospho)	0	S(3): 100.0; T(5): 0.0	2.45057e+07	0	2.518e-06	57.44	3.80437e-05	2	1510.7	1.41676	11.6857	1
High	NsLTGEEGQLAR	1	1	1	Q9BX95	S2(Phospho)	0	S(2): 100.0; T(4): 0.0	3.1238e+06	0	6.846e-09	64.69	6.74156e-06	2	1354.6	0.983011	15.4796	0
High	IISVtPVK	1	1	1	Q29RF7	T5(Phospho)	0	S(3): 1.7; T(5): 98.3	1.84494e+06	0.001	0.01754	28.99	0.0128075	2	936.517	0.441073	17.6503	0
High	AAVGQEsPGGLEAGNAK	1	1	1	Q29RF7	S7(Phospho)	0	S(7): 100.0	1.34146e+07	0	1.132e-10	81.29	1.87984e-07	2	1635.74	0.953068	14.1589	0
High	EQSSEAAETGVsENEENPVR	1	1	1	Q29RF7	S12(Phospho)	0	S(3): 0.0; S(4): 0.0; T(9): 0.0; S(12): 100.0	4.79654e+06	0	2.88e-05	49.8	0.000282725	2	2241.92	2.69209	15.1162	0
High	TEsPATAAETASEELDNR	5	1	1	Q9NTJ3	S3(Phospho)	0	T(1): 0.0; S(3): 100.0; T(6): 0.0; T(10): 0.0; S(12): 0.0	6.88864e+07	0	1.716e-15	99.78	2.59835e-09	2	1971.82	1.51036	22.5202	0
High	RREEGPPPPSPDGAsSDAEPEPPSGR	2	1	1	Q9NTJ3	S15(Phospho)	0	S(10): 0.0; S(15): 50.0; S(16): 50.0; S(24): 0.0	4422073	0	0.001159	10.2	3.6051	4	2751.2	0.289507	12.401	2
High	SGsAAQAEGLcK	3	1	1	Q92685	S3(Phospho); C11(Carbamidomethyl)	0	S(1): 0.0; S(3): 100.0	3.45407e+07	0	2.003e-07	82.63	8.13179e-08	2	1258.51	0.733822	10.2428	0
High	EIPSATQsPISK	1	1	1	Q9BQG0	S8(Phospho)	0	S(4): 0.0; T(6): 0.0; S(8): 99.1; S(11): 0.9	4.85031e+07	0	0.0001433	46.39	0.00043512	2	1337.64	1.2185	14.9095	0
High	DPAQPMsPGEATQSGAR	1	1	1	Q9BQG0	S7(Phospho)	0	S(7): 100.0; T(12): 0.0; S(14): 0.0	2.08001e+07	0	1.101e-10	75.87	5.88818e-07	2	1779.74	0.41811	15.9573	0
High	KNQKPSQVNGAPGsPTEPAGQK	1	1	1	Q9BQG0	S14(Phospho)	0	S(6): 0.0; S(14): 98.3; T(16): 1.7	2.17778e+06	0	0.000336	11.51	2.32378	3	2300.11	1.17247	7.23995	2
High	DPAQPmsPGEATQSGAR	1	1	1	Q9BQG0	M6(Oxidation); S7(Phospho)	0	S(7): 100.0; T(12): 0.0; S(14): 0.0	8.52293e+06	0	1.009e-08	40.08	0.00203222	2	1795.73	-0.560669	12.1709	0
High	SAGGsSPEGGEDSDREDGNYcPPVK	1	1	1	Q9H6Z4	S5(Phospho); C21(Carbamidomethyl)	0	S(1): 0.0; S(5): 0.0; S(6): 0.0; S(13): 50.0; Y(20): 50.0	1.41373e+07	0	0.00135	16.7	0.4618	3	2647.03	1.19271	12.8321	1
High	TSsLTQFPPSQSEER	6	1	1	Q9H6Z4	S3(Phospho)	0	T(1): 33.3; S(2): 33.3; S(3): 33.3; T(5): 0.0; S(10): 0.0; S(12): 0.0	9.93237e+06	0	1.308e-06	40.96	0.00192403	2	1773.77	3.05644	19.0802	0
High	VLsPPKLNEVSSDANR	2	1	1	Q9H6Z4	S3(Phospho)	0	S(3): 100.0; S(11): 0.0; S(12): 0.0	2.86107e+07	0	1.711e-07	51.67	0.00017734	3	1805.88	-1.47251	19.1468	1
High	EtFSSAEGTVDKDTTIMELR	1	1	1	P46100	T2(Phospho)	0	T(2): 96.9; S(4): 1.5; S(5): 1.5; T(9): 0.0; T(14): 0.0; T(15): 0.0	3.67789e+06	0	4.053e-06	38.09	0.00537126	3	2310.02	-0.0641833	24.9364	1
High	LTPVSLSNsPIK	1	1	1	P46100	S9(Phospho)	0	T(2): 0.0; S(5): 0.0; S(7): 0.0; S(9): 100.0	1.02538e+07	0	0.001397	18.19	0.291274	2	1335.69	0.221639	21.7185	0
High	EVIEIEDAsPTK	1	1	1	P46100	S9(Phospho)	0	S(9): 98.9; T(11): 1.1	5.14567e+06	0.001	0.01324	19.85	0.230319	2	1410.64	0.526264	19.8764	0
High	KKDELsDYAEK	1	1	1	P46100	S6(Phospho)	0	S(6): 99.5; Y(8): 0.5	4.90366e+06	0	1.291e-05	68.31	3.26869e-06	2	1405.63	1.01302	7.72405	2
High	LHDFLAHSSEESEETsSPPR	2	1	1	P46100	S16(Phospho)	0	S(8): 0.0; S(9): 0.0; S(12): 0.0; T(15): 1.1; S(16): 49.4; S(17): 49.4	5.0045e+06	0.001	0.009613	12.52	1.8388	3	2334.99	1.54635	14.2257	0
High	sDFVEsEAEESEEEyNDEGEVVPR	4	1	1	Q7KZ85	S1(Phospho); S6(Phospho); Y15(Phospho)	0	S(1): 98.6; S(6): 98.6; S(11): 51.4; Y(15): 51.4	669425	0	0.0004882	24.13	0.0396026	3	3014.03	-3.44176	43.2125	0
High	sPTmEQAVQTASAHLPAPAAVGR	1	1	1	Q8ND56	S1(Phospho); M4(Oxidation)	0	S(1): 98.5; T(3): 1.5; T(10): 0.0; S(12): 0.0	3.86544e+07	0	1.987e-05	33.49	0.014976	3	2386.12	-1.06627	20.6176	0
High	sSPQLDPLR	2	1	1	Q8ND56	S1(Phospho)	0	S(1): 50.0; S(2): 50.0	1.05604e+07	0.001	0.007213	34.41	0.0053612	2	1092.51	0.362863	19.5714	0
High	sSPQLDPLRK	2	1	1	Q8ND56	S1(Phospho)	0	S(1): 50.0; S(2): 50.0	2.11042e+07	0.003	0.03712	27.81	0.0314596	2	1220.6	0.325359	13.7592	1
High	sPVSTRPLPSASQK	2	1	1	Q8ND56	S1(Phospho)	0	S(1): 100.0; S(4): 0.0; T(5): 0.0; S(10): 0.0; S(12): 0.0	5.67323e+07	0	2.271e-05	47.98	0.000390091	2	1534.76	1.46981	10.8749	1
High	sPTMEQAVQTASAHLPAPAAVGR	1	1	1	Q8ND56	S1(Phospho)	0	S(1): 100.0; T(3): 0.0; T(10): 0.0; S(12): 0.0	7.69392e+07	0	2.078e-14	56.72	7.22503e-05	3	2370.13	0.515101	25.0355	0
High	EPDATPPsPR	1	1	1	P28715	S8(Phospho)	0	T(5): 0.0; S(8): 100.0	5.06527e+06	0	0.000371	38.79	0.00179696	2	1146.48	1.13747	11.0645	0
High	ELTPAsPTcTNSVSK	1	1	1	P28715	S6(Phospho); C9(Carbamidomethyl)	0	T(3): 0.0; S(6): 100.0; T(8): 0.0; T(10): 0.0; S(12): 0.0; S(14): 0.0	5.4756e+06	0	5.648e-09	54.86	8.50761e-05	2	1671.73	1.42062	14.8114	0
High	NAPAAVDEGSIsPR	1	1	1	P28715	S12(Phospho)	0	S(10): 0.0; S(12): 100.0	1.25444e+07	0	5.551e-10	67.22	4.35294e-06	2	1463.65	1.379	15.2285	0
High	IGEGTyGVVYK	1	3	1	P06493	Y6(Phospho)	0	T(5): 50.0; Y(6): 50.0; Y(10): 0.0	7.97144e+07	0	2.161e-06	72.47	1.10417e-06	2	1265.58	0.164563	17.2134	0
High	VyTHEVVTLWYR	2	1	1	P06493	Y2(Phospho)	0	Y(2): 49.6; T(3): 49.6; T(8): 0.9; Y(11): 0.0	2.19519e+06	0.009	0.0985	10.69	2.14128	3	1645.78	1.5124	25.1206	0
High	IGEGtyGVVYK	1	3	1	P06493	T5(Phospho); Y6(Phospho)	0	T(5): 100.0; Y(6): 100.0; Y(10): 0.0	1.60294e+07	0	3.147e-07	61.2	1.02787e-05	2	1345.55	0.228852	22.3932	0
High	ALQLSNsPGASSAFLK	1	1	1	Q12802	S7(Phospho)	0	S(5): 0.0; S(7): 100.0; S(11): 0.0; S(12): 0.0	7.00777e+06	0	8.845e-09	57.45	4.82997e-05	2	1670.82	1.74549	25.1326	0
High	SLsRPSSLIEQEK	4	1	1	Q12802	S3(Phospho)	0	S(1): 49.4; S(3): 49.4; S(6): 0.6; S(7): 0.6	4.54769e+06	0.002	0.02741	31.47	0.017857	2	1553.76	2.58321	16.1857	1
High	SGSLDSELSVsPK	1	1	1	Q12802	S11(Phospho)	0	S(1): 0.0; S(3): 0.0; S(6): 0.0; S(9): 0.0; S(11): 100.0	9.50897e+06	0	1.157e-05	50.44	0.000170338	2	1385.62	0.377078	19.6497	0
High	sAVLLVDETATTPIFANR	1	1	1	Q12802	S1(Phospho)	0	S(1): 100.0; T(9): 0.0; T(11): 0.0; T(12): 0.0	4.01924e+06	0	3.549e-07	41.51	0.00171988	2	1998	2.80545	32.7761	0
High	EVDATsPAPSTSSTVK	1	1	1	Q16666	S6(Phospho)	0	T(5): 0.0; S(6): 100.0; S(10): 0.0; T(11): 0.0; S(12): 0.0; S(13): 0.0; T(14): 0.0	1.74253e+07	0	1.466e-10	69.63	2.42287e-06	2	1656.74	0.678518	12.808	0
High	VSEEQTQPPsPAGAGmSTAmGR	1	1	1	Q16666	S10(Phospho); M16(Oxidation); M20(Oxidation)	0	S(2): 0.0; T(6): 0.0; S(10): 100.0; S(17): 0.0; T(18): 0.0	1.01054e+07	0	1.27e-06	34.92	0.00918005	2	2300.96	1.48888	13.3637	0
High	VSEEQTQPPsPAGAGmSTAMGR	2	1	1	Q16666	S10(Phospho); M16(Oxidation)	0	S(2): 0.0; T(6): 0.0; S(10): 100.0; S(17): 0.0; T(18): 0.0	1.58679e+07	0	5.065e-05	11.7	1.97078	2	2284.96	-0.512427	15.7978	0
High	VSEEQTQPPsPAGAGMSTAMGR	1	1	1	Q16666	S10(Phospho)	0	S(2): 0.1; T(6): 0.0; S(10): 99.9; S(17): 0.0; T(18): 0.0	3.30124e+07	0	1.227e-08	50.54	0.000288767	3	2268.97	1.27192	19.4526	0
High	KIPEPsPVTR	1	1	1	Q7Z4S6	S6(Phospho)	0	S(6): 100.0; T(9): 0.0	1.1562e+07	0.001	0.01279	20.63	0.173426	2	1203.61	1.28236	11.6608	1
High	EKELsPPPGLPSK	1	1	1	Q7Z4S6	S5(Phospho)	0	S(5): 100.0; S(12): 0.0	8.78362e+06	0	3.169e-06	47.43	0.000395771	2	1458.73	1.91396	16.0455	1
High	KLsSSDAPAQDTGSSAAAVETDASR	3	1	1	Q7Z4S6	S3(Phospho)	0	S(3): 97.3; S(4): 1.3; S(5): 1.3; T(12): 0.0; S(14): 0.0; S(15): 0.0; T(21): 0.0; S(24): 0.0	3.031e+07	0	1.692e-12	87.57	6.15946e-08	3	2502.1	1.14451	13.9273	1
High	TGSsSPPGGPPKPGSQLDSmLGSLQSDLNK	1	1	1	P49023	S4(Phospho); M20(Oxidation)	0	T(1): 0.0; S(3): 1.6; S(4): 96.7; S(5): 1.6; S(15): 0.0; S(19): 0.0; S(23): 0.0; S(26): 0.0	26297291	0	9.383e-09	45.32	0.00115743	3	3035.4	-1.33407	23.7283	1
High	TGSsSPPGGPPKPGSQLDSMLGSLQSDLNK	2	1	1	P49023	S4(Phospho)	0	T(1): 0.8; S(3): 32.8; S(4): 32.8; S(5): 32.8; S(15): 0.8; S(19): 0.0; S(23): 0.0; S(26): 0.0	1.43817e+07	0	1.967e-06	26.84	0.0747321	3	3019.41	0.451615	28.7356	1
High	FIHQQPQSSsPVYGSSAK	3	1	1	P49023	S10(Phospho)	0	S(8): 0.0; S(9): 1.3; S(10): 98.7; Y(13): 0.0; S(15): 0.0; S(16): 0.0	9.16038e+06	0	3.012e-09	24.85	0.0942741	3	2027.91	-4.76869	12.0531	0
High	sSPGGQDEGGFMAQGK	2	1	1	P49023	S1(Phospho)	0	S(1): 50.0; S(2): 50.0	5.55776e+06	0	3.482e-10	61.01	1.14913e-05	2	1632.64	0.94849	15.3406	0
High	AGSStPGDAPPAVAEVQGR	5	1	1	Q7Z6Z7	T5(Phospho)	0	S(3): 1.2; S(4): 49.4; T(5): 49.4	1.01942e+07	0	0.001428	18.02	0.472495	2	1846.84	5.86917	18.1676	0
High	GSGTAsDDEFENLR	1	1	1	Q7Z6Z7	S6(Phospho)	0	S(2): 0.0; T(4): 0.0; S(6): 100.0	3.12037e+07	0	6.746e-10	85.89	3.63261e-08	2	1577.61	1.86183	18.7983	0
High	AEsPEEVAcR	1	1	1	Q7Z6Z7	S3(Phospho); C9(Carbamidomethyl)	0	S(3): 100.0	4.23467e+06	0	2.721e-05	44.98	0.000341514	2	1227.47	0.921681	11.1335	0
High	EGMNPSYDEYADsDEDQHDAYLER	1	1	1	Q08945	S13(Phospho)	0	S(6): 0.0; Y(7): 0.0; Y(10): 0.0; S(13): 100.0; Y(21): 0.0	1.44361e+08	0	4.039e-13	61.7	1.27104e-05	3	2929.08	0.869279	20.097	0
High	EGmNPSYDEYADsDEDQHDAYLER	2	1	1	Q08945	M3(Oxidation); S13(Phospho)	0	S(6): 0.0; Y(7): 0.0; Y(10): 0.0; S(13): 100.0; Y(21): 0.0	9.78526e+07	0	3.319e-09	66.44	4.00631e-06	3	2945.08	1.01611	18.2709	0
High	VGGsDEEASGIPSR	1	1	1	Q9NQ55	S4(Phospho)	0	S(4): 100.0; S(9): 0.0; S(13): 0.0	8.10372e+07	0	7.921e-10	106.64	3.45749e-10	2	1440.6	1.14814	13.6191	0
High	ELEKPIQSKPQSPVIQAAAVsPK	1	1	1	Q9Y6D5	S21(Phospho)	0	S(8): 0.0; S(12): 0.0; S(21): 100.0	2.16936e+07	0	1.586e-09	64.44	4.51485e-06	3	2525.34	2.27874	16.8974	2
High	PQSPVIQAAAVsPK	1	1	1	Q9Y6D5	S12(Phospho)	0	S(3): 0.0; S(12): 100.0	6.01682e+06	0	4.639e-08	66.27	4.02462e-06	2	1472.75	1.29887	18.6903	0
High	DSPSKsSAEAQTPEDTPNK	4	1	1	O43493	S6(Phospho)	0	S(2): 0.4; S(4): 33.2; S(6): 33.2; S(7): 33.2; T(12): 0.0; T(16): 0.0	5.93254e+06	0	4.392e-07	39.43	0.00324401	3	2068.88	3.54473	8.36835	1
High	TEsGEETDLISPPQEEVK	2	1	1	O43493	S3(Phospho)	0	T(1): 0.7; S(3): 99.3; T(7): 0.0; S(11): 0.0	1.80552e+07	0	2.068e-12	82.66	1.66394e-07	2	2067.9	1.07226	22.8481	0
High	SsAEAQTPEDTPNK	2	1	1	O43493	S2(Phospho)	0	S(1): 1.2; S(2): 98.8; T(7): 0.0; T(11): 0.0	1.19134e+06	0	0.0002421	21.37	0.130938	2	1554.63	1.49401	8.83341	0
High	SESVVyADIR	1	1	1	O95297	Y6(Phospho)	0	S(1): 0.0; S(3): 1.0; Y(6): 99.0	5.76572e+06	0	0.00019	41.96	0.0011717	2	1218.54	1.16637	17.611	0
High	KsPSDTEGLVK	1	1	1	O95297	S2(Phospho)	0	S(2): 100.0; S(4): 0.0; T(6): 0.0	4.85457e+06	0	0.0001497	37.99	0.00283556	2	1240.58	0.055312	8.8613	1
High	DYTGcSTSESLsPVK	1	1	1	O95297	C5(Carbamidomethyl); S12(Phospho)	0	Y(2): 0.0; T(3): 0.0; S(6): 0.0; T(7): 0.0; S(8): 0.0; S(10): 0.0; S(12): 100.0	1.40197e+07	0	3.805e-09	75.45	5.71629e-07	2	1710.69	0.452924	18.4574	0
High	FGQAATMEGIGAIGGtPPAFNR	2	1	1	Q15233	T16(Phospho)	0	T(6): 0.0; T(16): 100.0	1.54183e+07	0	1.97e-05	12.57	1.76242	3	2243.04	2.5748	29.0383	0
High	AAPEASsPPAsPLQHLLPGK	6	1	1	Q96TA1	S7(Phospho); S11(Phospho)	0.0417	S(6): 1.5; S(7): 98.5; S(11): 100.0	2.58845e+07	0	1.389e-06	22.77	0.167781	3	2127.99	0.16303	28.041	0
High	AAPEASsPPASPLQHLLPGK	4	1	1	Q96TA1	S7(Phospho)	0	S(6): 1.9; S(7): 98.0; S(11): 0.0	3.95419e+07	0	2.822e-08	19.53	0.264088	3	2048.02	0.329346	24.5598	0
High	GLLAQGLRPEsPPPAGPLLNGAPAGESPQPK	1	1	1	Q96TA1	S11(Phospho)	0	S(11): 100.0; S(27): 0.0	1.3314e+07	0	2.73e-08	27.58	0.0268857	3	3096.6	3.47985	26.2499	1
High	MAPTPIPtRSPSDSSTASTPVAEQIER	3	1	1	Q16643	T8(Phospho)	0	T(4): 0.0; T(8): 32.8; S(10): 32.8; S(12): 32.8; S(14): 0.5; S(15): 0.5; T(16): 0.5; S(18): 0.0; T(19): 0.0	2.00419e+07	0	4.713e-13	40.05	0.00385536	3	2906.37	1.67362	21.1392	1
High	sPSDSSTASTPVAEQIER	2	1	1	Q16643	S1(Phospho)	0	S(1): 99.2; S(3): 0.8; S(5): 0.0; S(6): 0.0; T(7): 0.0; S(9): 0.0; T(10): 0.0	1.82918e+07	0	2.194e-13	88.6	4.00311e-08	2	1941.83	-5.34581	18.2685	0
High	mAPTPIPTRSPSDsSTASTPVAEQIER	5	1	1	Q16643	M1(Oxidation); S14(Phospho)	0	T(4): 0.3; T(8): 16.6; S(10): 16.6; S(12): 16.6; S(14): 16.6; S(15): 16.6; T(16): 16.6; S(18): 0.0; T(19): 0.0	1.23962e+07	0	7.997e-07	20.37	0.313151	3	2922.36	2.56907	19.945	1
High	PGtPSDHQSQEASQFER	2	1	1	Q6Y7W6	T3(Phospho)	0	T(3): 98.8; S(5): 1.2; S(9): 0.0; S(13): 0.0	1.02075e+07	0	1.024e-09	62.73	1.24e-05	3	1980.81	3.12853	10.802	0
High	WRPHsPDGPR	1	1	1	Q6Y7W6	S5(Phospho)	0	S(5): 100.0	2.63508e+07	0.001	0.01771	22.7	0.0880732	3	1284.56	-0.224445	6.71116	1
High	ALsSGGSITSPPLsPALPK	1	1	1	Q6Y7W6	S3(Phospho); S14(Phospho)	0	S(3): 98.3; S(4): 1.6; S(7): 0.0; T(9): 0.0; S(10): 0.0; S(14): 100.0	5.75423e+06	0	0.0008134	14.06	1.0248	2	1939.92	1.41064	31.449	0
High	VGVEASEETPQTsSSSARPGTPSDHQSQEASQFER	2	1	1	Q6Y7W6	S13(Phospho)	0	S(6): 0.0; T(9): 0.0; T(12): 0.1; S(13): 2.4; S(14): 2.4; S(15): 2.4; S(16): 2.4; T(21): 90.4; S(23): 0.1; S(27): 0.0; S(31): 0.0	4.92954e+07	0	2.33e-06	10.12	4.36277	4	3783.64	1.06392	13.8691	1
High	ALSSGGSITsPPLSPALPK	1	1	1	Q6Y7W6	S10(Phospho)	0	S(3): 1.3; S(4): 1.3; S(7): 0.0; T(9): 0.0; S(10): 97.4; S(14): 0.0	1.5233e+07	0	1.873e-09	59.49	2.02429e-05	2	1859.95	1.81149	26.7926	0
High	GGScSQAASSNSAQGsDESLIAcK	2	7	1	P30505	C4(Carbamidomethyl); S16(Phospho); C23(Carbamidomethyl)	0	S(3): 0.0; S(5): 0.0; S(9): 1.0; S(10): 1.0; S(12): 1.0; S(16): 48.4; S(19): 48.4	5.62753e+06	0	0.0007837	12.3	1.63404	3	2451.98	0.093294	15.418	0
High	EEETsIDVAGKPNEVTK	3	1	1	P53985	S5(Phospho)	0	T(4): 1.2; S(5): 98.8; T(16): 0.0	1.7882e+07	0	7.18e-10	86.93	5.90056e-08	2	1925.88	1.59434	14.1176	1
High	EsKEEETSIDVAGKPNEVTK	3	1	1	P53985	S2(Phospho)	0	S(2): 100.0; T(7): 0.0; S(8): 0.0; T(19): 0.0	6.80632e+07	0	4.555e-08	25.46	0.0952894	3	2270.04	0.466769	11.9138	2
High	TLHcEGTEINsDDEQESK	1	1	1	Q9BPX3	C4(Carbamidomethyl); S11(Phospho)	0	T(1): 0.0; T(7): 0.0; S(11): 100.0; S(17): 0.0	1.8883e+07	0	2.958e-10	70.42	1.78841e-06	3	2171.85	1.37415	9.99971	0
High	TLHcEGTEINsDDEQESKEVEETATAK	3	1	1	Q9BPX3	C4(Carbamidomethyl); S11(Phospho)	0	T(1): 0.0; T(7): 0.0; S(11): 100.0; S(17): 0.0; T(23): 0.0; T(25): 0.0	4.5563e+07	0	9.048e-12	53	0.000176418	3	3130.31	2.59936	14.7369	1
High	RGFsDSGGGPPAK	1	1	1	Q9H307	S4(Phospho)	0	S(4): 100.0; S(6): 0.0	1.24377e+07	0	0.0005523	33.86	0.00719512	2	1312.57	3.38811	7.89104	1
High	GFsDSGGGPPAK	1	1	1	Q9H307	S3(Phospho)	0	S(3): 100.0; S(5): 0.0	9.05539e+06	0	4.573e-09	76.69	3.05362e-07	2	1156.47	0.823954	11.5815	0
High	QEsDPEDDDVKKPALQSSVVATSK	1	1	1	Q9H307	S3(Phospho)	0	S(3): 100.0; S(17): 0.0; S(18): 0.0; T(22): 0.0; S(23): 0.0	7.39609e+07	0	1.326e-12	37.96	0.00567043	3	2653.23	0.852263	14.3898	2
High	PAEKPAETPVAtSPTATDSTSGDSSR	3	1	1	P54727	T12(Phospho)	0	T(8): 0.0; T(12): 33.2; S(13): 33.2; T(15): 33.2; T(17): 0.5; S(19): 0.0; T(20): 0.0; S(21): 0.0; S(24): 0.0; S(25): 0.0	3.87543e+06	0	7.588e-06	28.85	0.0488036	3	2640.17	1.79153	12.7233	1
High	QEKPAEKPAETPVATsPTATDSTSGDSSR	6	1	1	P54727	S16(Phospho)	0	T(11): 0.0; T(15): 1.7; S(16): 98.3; T(18): 0.0; T(20): 0.0; S(22): 0.0; T(23): 0.0; S(24): 0.0; S(27): 0.0; S(28): 0.0	6.82893e+07	0	2.154e-15	73.68	1.82347e-06	3	3025.37	1.83132	11.1061	2
High	MDRtPPPPTLsPAAITVGR	1	1	1	Q8NDX5	T4(Phospho); S11(Phospho)	0	T(4): 100.0; T(9): 0.0; S(11): 100.0; T(16): 0.0	9.56777e+06	0	7.051e-07	40.63	0.00256463	3	2136.99	0.735039	26.083	1
High	MDRtPPPPTLSPAAITVGR	1	1	1	Q8NDX5	T4(Phospho)	0	T(4): 100.0; T(9): 0.0; S(11): 0.0; T(16): 0.0	6.28231e+06	0	2.261e-08	46.11	0.000554713	3	2057.03	0.121733	22.83	1
High	mDRtPPPPTLsPAAITVGR	1	1	1	Q8NDX5	M1(Oxidation); T4(Phospho); S11(Phospho)	0	T(4): 100.0; T(9): 0.0; S(11): 100.0; T(16): 0.0	6.95332e+06	0	1.512e-08	58.98	4.02819e-05	3	2152.99	1.53221	25.4612	1
High	mDRtPPPPTLSPAAITVGR	1	1	1	Q8NDX5	M1(Oxidation); T4(Phospho)	0	T(4): 100.0; T(9): 0.0; S(11): 0.0; T(16): 0.0	4.01566e+06	0	6.31e-06	32.73	0.0139467	3	2073.02	1.48436	22.1671	1
High	AMsTTSISSPQPGK	1	1	1	Q9UJU6	S3(Phospho)	0	S(3): 100.0; T(4): 0.0; T(5): 0.0; S(6): 0.0; S(8): 0.0; S(9): 0.0	4.66739e+06	0	1.34e-08	64.96	7.35649e-06	2	1471.65	0.695956	15.0804	0
High	AmsTTSISSPQPGK	2	1	1	Q9UJU6	M2(Oxidation); S3(Phospho)	0	S(3): 50.0; T(4): 50.0; T(5): 0.0; S(6): 0.0; S(8): 0.0; S(9): 0.0	4.06117e+06	0	7.511e-10	63.83	8.36279e-06	2	1487.65	1.31672	12.0548	0
High	KYVIsDEEEEDDD	1	1	1	Q8WVC0	S5(Phospho)	0	Y(2): 0.0; S(5): 100.0	7.73696e+06	0	0.0001955	52.02	6.06076e-05	2	1665.61	0.933445	17.0988	1
High	KLTsDEEGEPSGK	1	1	1	Q8WVC0	S4(Phospho)	0	T(3): 0.0; S(4): 100.0; S(11): 0.0	7.8417e+06	0	1.642e-08	74.64	6.87116e-07	2	1456.62	-0.652151	7.11515	1
High	GKAsPFEEDQNR	1	1	1	Q8TB72	S4(Phospho)	0	S(4): 100.0	6.75008e+06	0	0.001695	50.24	0.000159914	2	1457.6	-6.51298	7.93607	1
High	QAsPTEVVER	1	1	1	Q8TB72	S3(Phospho)	0	S(3): 100.0; T(5): 0.0	4.157e+06	0	2.588e-07	76.59	3.17957e-07	2	1195.54	-0.155897	13.3585	0
High	SETAPAETATPAPVEKsPAK	2	1	1	P16401	S17(Phospho)	0	S(1): 0.0; T(3): 0.0; T(8): 0.0; T(10): 0.0; S(17): 100.0	3.77464e+07	0	6.54e-13	53.17	0.000144343	2	2061.97	-0.919863	12.1869	1
High	sEtAPAETATPAPVEKsPAK	1	1	1	P16401	N-Term(Acetyl); T3(Phospho); S17(Phospho)	0	S(1): 0.0; T(3): 0.0; T(8): 50.0; T(10): 50.0; S(17): 100.0	5.2397e+06	0.001	0.004137	18.53	0.432067	3	2183.95	0.286166	19.4882	1
High	sETAPAETATPAPVEKsPAK	2	1	1	P16401	N-Term(Acetyl); S17(Phospho)	0	S(1): 0.0; T(3): 0.0; T(8): 0.0; T(10): 0.0; S(17): 100.0	4.44193e+08	0	7.672e-11	56.53	6.56988e-05	2	2103.99	1.50346	16.8098	1
High	sETAPAETATPAPVEKsPAKK	2	1	1	P16401	N-Term(Acetyl); S17(Phospho)	0	S(1): 0.0; T(3): 0.0; T(8): 0.0; T(10): 0.0; S(17): 100.0	4.92207e+07	0	1.228e-08	12.8	1.47208	3	2232.08	1.5482	13.1598	2
High	HEAPsSPISGQPcGDDQNASPSK	2	1	1	O75376	S5(Phospho); C13(Carbamidomethyl)	0	S(5): 50.0; S(6): 50.0; S(9): 0.0; S(20): 0.0; S(22): 0.0	4.74113e+06	0	1.32e-06	19.16	0.337322	3	2446	0.948032	11.2574	0
High	AQLsPGIYDDTSAR	1	1	1	O75376	S4(Phospho)	0	S(4): 100.0; Y(8): 0.0; T(11): 0.0; S(12): 0.0	4224569	0	1.223e-08	61.45	1.82975e-05	2	1573.69	1.03917	20.011	0
High	VsPENLVDK	1	1	1	O75376	S2(Phospho)	0	S(2): 100.0	8.48975e+06	0	0.002073	27.43	0.0235836	2	1080.5	-0.198417	17.0216	0
High	SHVSSEPYEPIsPPQVPVVHEK	1	1	1	O75376	S12(Phospho)	0	S(1): 0.0; S(4): 0.0; S(5): 0.0; Y(8): 0.0; S(12): 100.0	2.98525e+07	0	5.417e-05	19.34	0.40628	3	2522.2	0.41216	20.3308	0
High	sPGSISYLPSFFTK	1	1	1	O75376	S1(Phospho)	0	S(1): 100.0; S(4): 0.0; S(6): 0.0; Y(7): 0.0; S(10): 0.0; T(13): 0.0	7.224e+06	0	1.425e-09	60.58	2.34496e-05	2	1610.75	1.00969	33.6619	0
High	LsGGLGAGScR	1	1	1	Q04695	S2(Phospho); C10(Carbamidomethyl)	0	S(2): 100.0; S(9): 0.0	1.20343e+07	0	4.841e-08	68.23	2.3449e-06	2	1114.47	0.0831829	12.2984	0
High	EsGVAGDPWKEETDTDLEVVLEK	1	1	1	Q1ED39	S2(Phospho)	0	S(2): 100.0; T(13): 0.0; T(15): 0.0	7.76286e+06	0	0.0003106	32.15	0.0227967	3	2626.18	-0.310122	27.4801	1
High	YSVLNNDDYFADVsPLR	1	1	1	Q1ED39	S14(Phospho)	0	Y(1): 0.0; S(2): 0.0; Y(9): 0.0; S(14): 100.0	5.48797e+06	0	1.01e-11	89.45	3.50151e-08	2	2067.91	2.62693	30.7812	0
High	QPSREstDGSINSYSSEGNLIFPGVR	18	1	1	Q86UR5	S6(Phospho); T7(Phospho)	0	S(3): 33.1; S(6): 33.1; T(7): 33.1; S(10): 33.1; S(13): 33.1; Y(14): 33.1; S(15): 1.2; S(16): 0.0	9.18735e+06	0	2.474e-05	28.61	0.0566722	3	2957.28	2.80867	37.9619	1
High	ASQssLESSTGPPcIR	1	1	1	Q86UR5	S4(Phospho); S5(Phospho); C14(Carbamidomethyl)	0	S(2): 98.5; S(4): 3.0; S(5): 98.5; S(8): 0.0; S(9): 0.0; T(10): 0.0	5.01868e+06	0	2.312e-07	53.85	6.88203e-05	2	1836.72	-0.198816	22.8052	0
High	ASQsSLESSTGPPcIR	2	1	1	Q86UR5	S4(Phospho); C14(Carbamidomethyl)	0	S(2): 96.9; S(4): 1.5; S(5): 1.5; S(8): 0.0; S(9): 0.0; T(10): 0.0	2.60299e+06	0	1.348e-06	32.52	0.0140219	2	1756.76	2.7233	17.5477	0
High	RAsQsSLESSTGPPcIR	2	1	1	Q86UR5	S3(Phospho); S5(Phospho); C15(Carbamidomethyl)	0	S(3): 100.0; S(5): 50.0; S(6): 50.0; S(9): 0.0; S(10): 0.0; T(11): 0.0	2.55701e+07	0	0.0007014	21.62	0.154947	2	1992.83	1.08014	16.96	1
High	SGTSSPQsPVFR	1	1	1	Q8N556	S8(Phospho)	0	S(1): 0.0; T(3): 0.0; S(4): 0.0; S(5): 0.0; S(8): 100.0	2.10159e+07	0	2.527e-05	55	5.91346e-05	2	1329.59	4.88205	14.2602	0
High	TGsNAAQYK	1	1	1	Q8N556	S3(Phospho)	0	T(1): 0.0; S(3): 100.0; Y(8): 0.0	7.22857e+06	0	5.678e-05	69.54	1.22846e-06	2	1019.42	-0.331908	6.52566	0
High	EAYSGcSGPVDSEcPPPPsSPVHK	2	1	1	Q8N556	C6(Carbamidomethyl); C14(Carbamidomethyl); S19(Phospho)	0	Y(3): 0.0; S(4): 0.0; S(7): 0.0; S(12): 0.0; S(19): 98.8; S(20): 1.2	1.09666e+07	0	1.124e-06	13.83	1.242	3	2621.07	0.774286	14.8213	0
High	YFDsGDYNmAK	1	2	1	P56211	S4(Phospho); M9(Oxidation)	0	Y(1): 0.0; S(4): 100.0; Y(7): 0.0	1.15254e+07	0	6.527e-05	52.12	4.20427e-05	2	1406.5	0.296355	15.7531	0
High	YFDsGDYNMAK	1	2	1	P56211	S4(Phospho)	0	Y(1): 0.0; S(4): 100.0; Y(7): 0.0	1.77961e+07	0	5.182e-08	69.37	9.07548e-07	2	1390.51	3.22695	19.6223	0
High	VLtPEEQLADK	1	1	1	O75822	T3(Phospho)	0	T(3): 100.0	1.03395e+07	0	3.533e-06	60.29	1.75856e-05	2	1322.62	0.51344	20.8131	0
High	aAAAAAAGDSDsWDADAFSVEDPVR	7	1	1	O75822	N-Term(Acetyl); S12(Phospho)	0	S(10): 50.0; S(12): 50.0; S(19): 0.0	1.70928e+08	0	2.708e-10	58.08	4.32558e-05	3	2587.07	3.17362	39.6215	0
High	aAAAAAAGDsDSWDADAFSVEDPVRK	2	1	1	O75822	N-Term(Acetyl); S10(Phospho)	0	S(10): 49.5; S(12): 49.5; S(19): 0.9	3.84289e+08	0	0.0005567	20.56	0.313372	3	2715.16	-0.100472	30.7756	1
High	SEsLIDAsEDSQLEAAIR	1	1	1	O94888	S3(Phospho); S8(Phospho)	0	S(1): 1.3; S(3): 98.7; S(8): 98.7; S(11): 1.3	4.22278e+06	0	0.0003646	31.71	0.0164922	2	2093.86	-1.48708	33.0997	0
High	SEsLIDASEDSQLEAAIR	2	1	1	O94888	S3(Phospho)	0	S(1): 0.8; S(3): 99.2; S(8): 0.0; S(11): 0.0	1.33045e+07	0	2.135e-11	95.11	9.12624e-09	2	2013.9	-0.0802693	27.7563	0
High	SHtSEGAHLDITPNSGAAGNSAGPK	2	1	1	Q92597	T3(Phospho)	0	S(1): 0.7; T(3): 49.6; S(4): 49.6; T(12): 0.0; S(15): 0.0; S(21): 0.0	7.534e+06	0	1.727e-07	32.84	0.0180699	3	2456.09	1.56728	12.546	0
High	TAsGSSVTSLDGTR	1	1	1	Q92597	S3(Phospho)	0	T(1): 0.0; S(3): 100.0; S(5): 0.0; S(6): 0.0; T(8): 0.0; S(9): 0.0; T(13): 0.0	5.48405e+06	0	2.018e-10	87.57	3.47345e-08	2	1418.62	0.90426	14.4673	0
High	VEQATKPsFESGR	1	1	1	P38159	S8(Phospho)	0	T(5): 0.0; S(8): 98.6; S(11): 1.4	8.19312e+06	0.003	0.04808	18.25	0.330668	2	1515.69	1.1442	9.80681	1
High	GLPPsMER	4	1	1	P38159	S5(Phospho)	0	S(5): 100.0	8.13712e+07	0.001	0.003822	35.45	0.00289378	2	966.412	0.0458626	14.757	0
High	DYGHsSSRDDYPSR	1	2	2	P38159;Q96E39	S5(Phospho)	0	Y(2): 0.0; S(5): 100.0; S(6): 0.0; S(7): 0.0; Y(11): 0.0; S(13): 0.0	6.99705e+06	0	0.0005155	17.46	0.236905	3	1721.66	1.28393	7.12202	1
High	GRDsYGGPPR	1	2	2	P38159;Q96E39	S4(Phospho)	0	S(4): 100.0; Y(5): 0.0	5.57236e+06	0	5.695e-06	59.08	1.94662e-05	2	1141.48	0.554846	6.54362	1
High	GLVAAYSGDsDNEEELVER	1	1	1	P52756	S10(Phospho)	0	Y(6): 0.0; S(7): 0.0; S(10): 100.0	1.30406e+07	0	5.232e-15	98.87	3.77479e-09	2	2132.91	2.10016	24.3919	0
High	SYsSPDITQAIQEEEKR	4	1	1	P40818	S3(Phospho)	0	S(1): 0.0; Y(2): 0.0; S(3): 100.0; S(4): 0.0; T(8): 0.0	2.51713e+07	0	4.624e-09	84.2	1.04932e-07	2	2060.92	2.00979	21.1847	1
High	RcPtPEIQK	1	1	1	P40818	C2(Carbamidomethyl); T4(Phospho)	0	T(4): 100.0	4.58962e+06	0	0.003019	37.68	0.00301124	2	1208.55	1.19362	7.22627	1
High	RGsSGSVDETLFALPAASEPVIR	4	1	1	Q9NQC3	S3(Phospho)	0	S(3): 96.1; S(4): 1.9; S(6): 1.9; T(10): 0.0; S(18): 0.0	7.2345e+06	0	1.151e-05	18.24	0.413163	3	2439.2	2.03185	29.1547	1
High	mEDLDQSPLVSSSDsPPRPQPAFK	1	1	1	Q9NQC3	N-Term(Acetyl); S15(Phospho)	0	S(7): 0.0; S(11): 0.0; S(12): 0.0; S(13): 0.0; S(15): 100.0	4.89533e+08	0	1.929e-11	29.38	0.0444656	3	2750.24	1.74337	30.5661	1
High	mEDLDQSPLVSSSDsPPRPQPAFK	2	1	1	Q9NQC3	N-Term(Acetyl); M1(Oxidation); S15(Phospho)	0	S(7): 0.0; S(11): 0.0; S(12): 0.0; S(13): 0.0; S(15): 100.0	2.77978e+07	0	2.046e-06	46.99	0.000843942	2	2766.25	4.85611	27.1185	1
High	tsRDTSPSSGSAVSSSK	3	1	1	Q8NEY8	T1(Phospho); S2(Phospho)	0	T(1): 49.9; S(2): 49.9; T(5): 49.9; S(6): 49.9; S(8): 0.1; S(9): 0.1; S(11): 0.1; S(14): 0.0; S(15): 0.0; S(16): 0.0	3.46274e+06	0.002	0.0205	10.35	1.7206	2	1800.71	1.87496	7.30738	1
High	DNTFFREsPVGR	2	1	1	Q8NEY8	S8(Phospho)	0	T(3): 0.0; S(8): 100.0	3.9954e+07	0	8.26e-06	24.2	0.0828813	3	1504.66	1.32691	18.4431	1
High	DTsPSSGSAVSSSK	1	1	1	Q8NEY8	S3(Phospho)	0	T(2): 0.0; S(3): 100.0; S(5): 0.0; S(6): 0.0; S(8): 0.0; S(11): 0.0; S(12): 0.0; S(13): 0.0	2.01314e+07	0	4.033e-09	94.86	4.94781e-09	2	1376.56	2.32346	7.63521	0
High	LFPDtPLALDANK	1	1	1	Q12906	T5(Phospho)	0	T(5): 100.0	7.33822e+06	0	5.303e-06	38.57	0.00332199	2	1494.72	0.152846	28.9531	0
High	DSSKGEDSAEEtEAKPAVVAPAPVVEAVSTPSAAFPSDATAEQGPILTK	2	1	1	Q12906	T12(Phospho)	0	S(2): 0.1; S(3): 0.0; S(8): 2.9; T(12): 97.0; S(29): 0.0; T(30): 0.0; S(32): 0.0; S(37): 0.0; T(40): 0.0; T(48): 0.0	4.16167e+08	0	5.396e-12	39.14	0.00298652	4	4932.37	3.39742	29.7209	2
High	GEDsAEETEAKPAVVAPAPVVEAVSTPSAAFPSDATAEQGPILTK	2	1	1	Q12906	S4(Phospho)	0	S(4): 100.0; T(8): 0.0; S(25): 0.0; T(26): 0.0; S(28): 0.0; S(33): 0.0; T(36): 0.0; T(44): 0.0	6.10151e+07	0	6.418e-06	30.08	0.0217948	4	4515.19	3.26655	31.5499	1
High	RPMEEDGEEKsPSK	1	1	1	Q12906	S11(Phospho)	0	S(11): 100.0; S(13): 0.0	5.05468e+07	0	3.778e-08	63.98	8.01889e-06	3	1698.7	-0.0816243	5.48207	2
High	RPmEEDGEEKsPSK	1	1	1	Q12906	M3(Oxidation); S11(Phospho)	0	S(11): 100.0; S(13): 0.0	0	0	0.0003024	29.17	0.0249989	3	1714.7	0.713361	1.95772	2
High	HDSIPAADTFEDLsDVEGGGSEPTQR	1	1	1	O95671	S14(Phospho)	0	S(3): 0.0; T(9): 0.0; S(14): 100.0; S(21): 0.0; T(24): 0.0	1.08181e+07	0	9.384e-17	98.26	5.16507e-09	3	2810.18	1.14647	24.7134	0
High	KGGEFDEFVNDDtDDDLPISK	2	1	1	Q6PD62	T13(Phospho)	0	T(13): 100.0; S(20): 0.0	34273524	0	4.708e-09	82	1.94966e-07	3	2436.02	1.2894	25.7191	1
High	GGEFDEFVNDDtDDDLPISK	1	1	1	Q6PD62	T12(Phospho)	0	T(12): 100.0; S(19): 0.0	3.11665e+07	0	2.042e-07	26.92	0.0549753	2	2307.93	3.27059	30.1096	0
High	DGQDAIAQsPEK	1	1	1	Q9NWH9	S9(Phospho)	0	S(9): 100.0	9.98489e+06	0	7.816e-07	50.51	0.00012271	2	1338.56	0.211038	11.8293	0
High	sPGHMVILDQTK	1	1	1	Q9NWH9	S1(Phospho)	0	S(1): 100.0; T(11): 0.0	2.22863e+07	0	7.073e-10	72.59	1.24758e-06	2	1405.66	1.03948	16.0957	0
High	SQtPPGVATPPIPK	1	1	1	Q15648	T3(Phospho)	0	S(1): 0.0; T(3): 100.0; T(9): 0.0	9.96194e+06	0	8.583e-07	62.09	1.22058e-05	2	1469.74	3.15307	21.6401	0
High	NSSQSGGKPGsSPITK	2	1	1	Q15648	S11(Phospho)	0	S(2): 0.0; S(3): 0.0; S(5): 0.0; S(11): 50.0; S(12): 50.0; T(15): 0.0	4.4839e+06	0.001	0.004459	10.63	2.13647	2	1611.74	1.66752	6.0655	1
High	LPSTSDDcPAIGtPLR	1	1	1	Q15648	C8(Carbamidomethyl); T13(Phospho)	0	S(3): 0.0; T(4): 0.0; S(5): 0.0; T(13): 100.0	8.9443e+06	0	6.777e-08	61.51	1.80464e-05	2	1779.8	1.10364	22.0424	0
High	TPTsPLK	1	1	1	O60264	S4(Phospho)	0	T(1): 0.0; T(3): 0.7; S(4): 99.3	1.47652e+07	0.001	0.007545	38.68	0.00118579	2	823.397	0.69563	9.64361	0
High	QKSDAEEDGGtVSQEEEDR	2	1	1	P27824	T11(Phospho)	0.027	S(3): 1.1; T(11): 97.7; S(13): 1.1	2.76024e+06	0	0.0001023	35.96	0.00526039	3	2188.85	1.02363	8.28928	1
High	AEEDEILNRsPR	2	1	1	P27824	S10(Phospho)	0	S(10): 100.0	1.36337e+09	0	1.019e-05	38.38	0.00299135	2	1508.68	0.625799	12.864	1
High	KTsSVSSISQVSPER	1	1	1	P42356	S3(Phospho)	0	T(2): 0.0; S(3): 100.0; S(4): 0.0; S(6): 0.0; S(7): 0.0; S(9): 0.0; S(12): 0.0	4.36511e+06	0	1.032e-07	75.02	8.27858e-07	2	1671.8	2.62095	12.5682	1
High	sNLDITVGSR	1	1	1	P42356	S1(Phospho)	0	S(1): 100.0; T(6): 0.0; S(9): 0.0	1.31126e+06	0	2.74e-06	47.83	0.000290901	2	1141.53	2.57316	18.5582	0
High	sPPPVSK	1	1	1	Q01130	S1(Phospho)	0	S(1): 100.0; S(6): 0.0	2.42906e+06	0.005	0.0654	27.51	0.0154354	2	791.368	-1.86575	6.57713	0
High	STAQQELDGKPAsPTPVIVASHTANK	3	1	1	P35606	S13(Phospho)	0	S(1): 0.0; T(2): 0.0; S(13): 50.0; T(15): 50.0; S(21): 0.0; T(23): 0.0	1.44517e+08	0	1.519e-09	29.83	0.026258	3	2727.34	0.478695	15.7104	1
High	STAQQELDGKPAsPTPVIVASHTANKEEK	6	1	1	P35606	S13(Phospho)	0	S(1): 0.0; T(2): 0.0; S(13): 100.0; T(15): 0.0; S(21): 0.0; T(23): 0.0	2.18298e+08	0	2.632e-15	51.7	0.000196402	3	3113.52	2.32269	13.8056	2
High	EATGLsPQAAQEK	1	1	1	P17029	S6(Phospho)	0	T(3): 0.0; S(6): 100.0	5.45715e+06	0	1.734e-08	96.17	5.20532e-09	2	1409.64	3.48139	12.649	0
High	IEsPKLER	2	1	1	Q92598	S3(Phospho)	0	S(3): 100.0	1.15168e+08	0.003	0.03493	41.33	0.00111167	2	1051.52	0.190188	9.29831	1
High	tPTQPLLESGFR	2	1	1	Q9HBL0	T1(Phospho)	0	T(1): 50.0; T(3): 50.0; S(9): 0.0	1.34606e+06	0.002	0.03279	21.93	0.153249	2	1425.69	6.92379	24.4942	0
High	VATTPGsPSLGR	1	1	1	Q9HBL0	S7(Phospho)	0	T(3): 0.0; T(4): 0.0; S(7): 0.9; S(9): 99.1	1.58261e+07	0	2.336e-05	55.51	5.46915e-05	2	1222.58	-0.491894	13.8902	0
High	QGsPTPALPEK	1	1	1	Q9HBL0	S3(Phospho)	0	S(3): 100.0; T(5): 0.0	4.29975e+06	0	0.0001618	45.37	0.000521272	2	1204.56	0.978852	14.2688	0
High	QGsPTPALPEKR	1	1	1	Q9HBL0	S3(Phospho)	0	S(3): 100.0; T(5): 0.0	1.75436e+06	0.002	0.02054	27.72	0.0359219	2	1360.66	-3.0248	10.6617	1
High	WDsYDNFSGHR	1	1	1	Q9HBL0	S3(Phospho)	0	S(3): 99.1; Y(4): 0.9; S(8): 0.0	2.62796e+06	0.003	0.04584	12.4	0.644493	2	1463.54	1.09998	15.375	0
High	SQsFSEAEPQLPPAPVR	1	1	1	Q9HBL0	S3(Phospho)	0	S(1): 1.2; S(3): 97.6; S(5): 1.2	7863434	0	0.000289	17.08	0.612139	2	1919.89	2.39938	24.67	0
High	HPGAHQGNLASGLHSNAIASPGsPSLGR	1	1	1	Q9HBL0	S23(Phospho)	0	S(11): 0.0; S(15): 0.0; S(20): 0.0; S(23): 98.2; S(25): 1.8	5.10402e+06	0	0.0007857	12.79	1.83317	4	2770.32	2.11686	15.0941	0
High	HLGGSGSVVPGsPcLDR	2	1	1	Q9HBL0	S12(Phospho); C14(Carbamidomethyl)	0	S(5): 0.0; S(7): 0.0; S(12): 100.0	8.1312e+06	0	0.001983	11.34	1.9685	3	1774.79	-0.0409594	17.2437	0
High	AASDGQYENQsPEATSPR	1	1	1	Q9HBL0	S11(Phospho)	0	S(3): 0.0; Y(7): 0.0; S(11): 100.0; T(15): 0.0; S(16): 0.0	2.09019e+06	0	2.913e-07	39.1	0.00294649	2	1987.8	0.938155	11.5432	0
High	WDKDDFEsEEEDVK	1	1	1	Q7Z6E9	S8(Phospho)	0	S(8): 100.0	1.19654e+07	0	1.585e-08	68.71	1.84383e-06	2	1850.7	0.453474	17.2237	1
High	LGYLVsPPQQIR	1	1	1	Q7Z6E9	S6(Phospho)	0	Y(3): 0.0; S(6): 100.0	2.79576e+06	0	0.0005209	26.74	0.0460744	2	1450.75	0.229425	25.726	0
High	LEVTEIVKPsPK	1	1	1	Q7Z6E9	S10(Phospho)	0	T(4): 0.0; S(10): 100.0	1.17181e+07	0	4.814e-05	43.57	0.000767	2	1419.75	0.785807	18.7827	1
High	LSStDDGYIDLQFK	1	1	1	Q96A57	T4(Phospho)	0	S(2): 0.0; S(3): 50.0; T(4): 50.0; Y(8): 0.0	1.65359e+07	0	2.582e-10	95.63	6.20906e-09	2	1681.74	0.0196655	28.1999	0
High	SETSWEsPK	1	1	1	Q86UE4	S7(Phospho)	0	S(1): 0.0; T(3): 0.0; S(4): 0.0; S(7): 100.0	2.80348e+06	0.001	0.01231	18.72	0.131591	2	1130.44	0.351241	12.0738	0
High	LSSQIsAGEEK	1	1	1	Q86UE4	S6(Phospho)	0	S(2): 0.0; S(3): 0.0; S(6): 100.0	1.22295e+07	0	0.0004927	42.4	0.000995511	2	1228.55	0.364558	11.6568	0
High	WNSVsPASAGK	1	1	1	Q86UE4	S5(Phospho)	0	S(3): 0.0; S(5): 100.0; S(8): 0.0	2.75558e+06	0	4.273e-09	69.55	1.89669e-06	2	1183.52	1.29651	13.3824	0
High	SQEPIPDDQKVsDDDKEK	1	1	1	Q86UE4	S12(Phospho)	0	S(1): 0.0; S(12): 100.0	2.43942e+07	0	0.000111	31.94	0.0173688	3	2152.93	2.62469	9.42848	2
High	SKGSLEItESQSADAEPPPPPKPDLSR	4	1	1	Q9C0B5	T8(Phospho)	0	S(1): 0.7; S(4): 24.8; T(8): 24.8; S(10): 24.8; S(12): 24.8; S(26): 0.0	3.66439e+06	0	3.442e-05	13.49	1.51551	3	2913.39	0.974084	18.0038	2
High	DSPPtPTMYK	1	1	1	Q9C0B5	T5(Phospho)	0	S(2): 0.0; T(5): 98.7; T(7): 1.2; Y(9): 0.0	3.75131e+06	0.004	0.05015	13.92	0.527161	2	1216.5	0.434896	16.4138	0
High	SFHFDPLSsGSR	3	1	1	Q9C0B5	S9(Phospho)	0	S(1): 0.0; S(8): 0.5; S(9): 49.7; S(11): 49.7	4.66649e+06	0.001	0.008316	22.7	0.0934435	2	1416.59	0.334557	21.6573	0
High	GVGsPEPGPTAPYLGR	1	1	1	Q9C0B5	S4(Phospho)	0	S(4): 100.0; T(10): 0.0; Y(13): 0.0	3.83345e+06	0	0.000125	19.15	0.32533	2	1634.76	0.822361	22.3534	0
High	GDsLKEPTSIAESSR	3	1	1	Q9C0B5	S3(Phospho)	0	S(3): 100.0; T(8): 0.0; S(9): 0.0; S(13): 0.0; S(14): 0.0	2.40293e+07	0	9.615e-09	80.47	2.3378e-07	2	1656.75	1.18852	13.9921	1
High	SLGSASPGPGQPPLsSPTR	2	1	1	Q9C0B5	S15(Phospho)	0	S(1): 0.0; S(4): 0.0; S(6): 0.0; S(15): 33.3; S(16): 33.3; T(18): 33.3	8.75254e+06	0	2.887e-06	38.77	0.0036437	2	1872.89	3.30116	18.8393	0
High	QLPLEPEsPSGQVGPR	1	1	1	Q3KQU3	S8(Phospho)	0	S(8): 98.5; S(10): 1.5	6.5345e+06	0	8.457e-05	24.94	0.0854471	2	1770.85	1.81511	22.8677	0
High	LSASTASELsPK	1	1	1	Q3KQU3	S10(Phospho)	0	S(2): 0.0; S(4): 0.0; T(5): 0.0; S(7): 0.0; S(10): 100.0	7.94978e+06	0	4.425e-08	92.38	1.12151e-08	2	1270.59	-0.186901	14.5514	0
High	NSsPGEASLLEK	1	1	1	Q76FK4	S3(Phospho)	0	S(2): 0.0; S(3): 100.0; S(8): 0.0	7.18473e+06	0	6.259e-07	63.37	9.73443e-06	2	1311.58	1.35716	16.884	0
High	VScHDsDDDImR	1	1	1	Q76FK4	C3(Carbamidomethyl); S6(Phospho); M11(Oxidation)	0	S(2): 0.0; S(6): 100.0	4.16117e+06	0.002	0.02621	11.89	0.495064	2	1545.53	0.139976	7.29183	0
High	VScHDsDDDIMR	1	1	1	Q76FK4	C3(Carbamidomethyl); S6(Phospho)	0	S(2): 0.0; S(6): 100.0	9.79301e+06	0	1.008e-05	55.49	2.18928e-05	2	1529.54	1.36599	10.7326	0
High	QEEAEEQGAGsPGQPAHLAR	2	1	1	Q96S99	S11(Phospho)	0	S(11): 100.0	1.27721e+07	0	7.192e-10	61.95	1.83501e-05	3	2141.93	2.06454	11.3689	0
High	KDDsDDDGGGWITPSNIK	2	1	1	Q9ULX3	S4(Phospho)	0	S(4): 100.0; T(13): 0.0; S(15): 0.0	5.42832e+07	0	1.395e-12	89.63	2.73321e-08	2	1999.83	1.52616	20.5579	1
High	SRPTSEGsDIESTEPQK	2	1	1	Q4G0J3	S8(Phospho)	0	S(1): 0.0; T(4): 0.0; S(5): 0.0; S(8): 100.0; S(12): 0.0; T(13): 0.0	1.37574e+07	0	1.607e-07	49.62	0.000323066	3	1927.83	0.731735	8.93541	1
High	SSsEDAESLAPR	3	1	1	Q4G0J3	S3(Phospho)	0	S(1): 1.0; S(2): 1.0; S(3): 97.9; S(8): 0.0	2.11668e+07	0	1.877e-05	69.36	1.69181e-06	2	1328.54	0.663048	14.5199	0
High	sRPTSEGsDIESTEPQK	1	1	1	Q4G0J3	S1(Phospho); S8(Phospho)	0	S(1): 95.9; T(4): 2.1; S(5): 2.1; S(8): 99.9; S(12): 0.0; T(13): 0.0	1.14179e+07	0.008	0.09255	16.29	0.51457	2	2007.79	-0.973822	12.1801	1
High	aAAVAAAGAGEPQsPDELLPK	1	1	1	Q9NS69	N-Term(Acetyl); S14(Phospho)	0	S(14): 100.0	6.70542e+06	0	1.428e-06	29.76	0.0326557	2	2084.99	0.547358	36.0128	0
High	sAPATGGVK	1	3	1	P68431	S1(Phospho)	0	S(1): 100.0; T(5): 0.0	2.00417e+06	0.001	0.00352	29.58	0.00820647	2	867.398	1.38548	6.57027	0
High	GPPASsPAPAPK	1	1	1	Q15942	S6(Phospho)	0	S(5): 1.1; S(6): 98.9	1.71943e+07	0	3.03e-06	47.07	0.000400525	2	1156.54	3.02648	9.14793	0
High	FsPVTPK	1	1	1	Q15942	S2(Phospho)	0	S(2): 100.0; T(5): 0.0	1.15649e+07	0.009	0.111	25.12	0.0584458	2	855.401	-0.571546	14.4897	0
High	FsPGAPGGSGSQPNQK	1	1	1	Q15942	S2(Phospho)	0	S(2): 100.0; S(9): 0.0; S(11): 0.0	1.50746e+07	0	9.436e-11	62.46	1.20887e-05	2	1595.69	0.110274	12.213	0
High	sPGAPGPLTLK	1	1	1	Q15942	S1(Phospho)	0	S(1): 100.0; T(9): 0.0	1.76702e+07	0	0.0006957	35.34	0.00520499	2	1117.57	0.430576	20.3423	0
High	RGsGDTSSLIDPDTSLSELR	2	1	1	Q9Y608	S3(Phospho)	0	S(3): 100.0; T(6): 0.0; S(7): 0.0; S(8): 0.0; T(14): 0.0; S(15): 0.0; S(17): 0.0	2.55384e+07	0	3.892e-13	65.46	9.47206e-06	3	2186	1.47354	24.7116	1
High	NSASATTPLSGNSsR	2	1	1	Q9Y608	S14(Phospho)	0	S(2): 0.0; S(4): 0.0; T(6): 0.0; T(7): 0.0; S(10): 0.7; S(13): 0.7; S(14): 98.5	4.93183e+06	0	2.346e-07	46.97	0.000449032	2	1529.66	-1.02763	11.8815	0
High	sPTGPSNSFLANmGGTVAHK	1	1	1	Q96I25	S1(Phospho); M13(Oxidation)	0	S(1): 100.0; T(3): 0.0; S(6): 0.0; S(8): 0.0; T(16): 0.0	1.34326e+07	0	4.112e-08	43.98	0.00122583	3	2068.92	0.584883	16.6278	0
High	sMGGAAIAPPTSLVEK	1	1	1	Q96I25	S1(Phospho)	0	S(1): 100.0; T(11): 0.0; S(12): 0.0	2.48637e+06	0.001	0.01147	21.86	0.181153	2	1608.78	2.99096	25.702	0
High	sPTGPSNSFLANMGGTVAHK	3	1	1	Q96I25	S1(Phospho)	0	S(1): 100.0; T(3): 0.0; S(6): 0.0; S(8): 0.0; T(16): 0.0	2.60075e+07	0	2.011e-08	43.18	0.00152426	3	2052.92	-0.430705	22.1151	0
High	AEGAAtEEEGTPKESEPQAAAEPAEAK	3	1	1	P80723	T6(Phospho)	0	T(6): 33.3; T(11): 33.3; S(15): 33.3	6.47637e+06	0	1.335e-05	12.96	1.83361	3	2778.2	1.354	12.2344	1
High	ETPAATEAPSStPK	3	1	1	P80723	T12(Phospho)	0	T(2): 0.0; T(6): 0.0; S(10): 1.2; S(11): 1.2; T(12): 97.7	4.85451e+07	0	1.122e-06	58.42	3.07903e-05	2	1466.64	1.94744	10.7347	0
High	sDGAPASDSKPGSSEAAPSSK	1	1	1	P80723	S1(Phospho)	0	S(1): 100.0; S(7): 0.0; S(9): 0.0; S(13): 0.0; S(14): 0.0; S(19): 0.0; S(20): 0.0	4.44843e+06	0	2.859e-07	44.52	0.000921808	2	2012.85	2.29346	7.49711	1
High	YGMGTsVER	1	1	1	P08559	S6(Phospho)	0	Y(1): 0.0; T(5): 0.0; S(6): 100.0	9.83345e+06	0	4.792e-05	59.2	1.19024e-05	2	1079.42	0.221351	12.8937	0
High	YHGHsMSDPGVsYR	4	2	1	P08559	S5(Phospho); S12(Phospho)	0	Y(1): 0.0; S(5): 98.6; S(7): 1.4; S(12): 98.6; Y(13): 1.4	6.23063e+06	0	0.0007762	24.94	0.0367118	2	1752.63	1.36534	11.7343	0
High	YHGHsmSDPGVSYR	3	2	1	P08559	S5(Phospho); M6(Oxidation)	0	Y(1): 0.0; S(5): 100.0; S(7): 0.0; S(12): 0.0; Y(13): 0.0	1.63353e+07	0	4.265e-07	32.55	0.00917242	3	1688.65	0.277054	7.23444	0
High	YHGHsMSDPGVSYR	3	2	1	P08559	S5(Phospho)	0	Y(1): 0.0; S(5): 100.0; S(7): 0.0; S(12): 0.0; Y(13): 0.0	2.60586e+07	0	3.17e-07	26.6	0.0380671	3	1672.66	-0.972363	9.34259	0
High	YGmGTsVER	1	1	1	P08559	M3(Oxidation); S6(Phospho)	0	Y(1): 0.0; T(5): 0.9; S(6): 99.1	5.31092e+06	0	0.002983	40	0.00095	2	1095.42	0.291258	8.43286	0
High	LTFDSSFsPNTGK	1	1	1	P21796	S8(Phospho)	0	T(2): 0.0; S(5): 0.0; S(6): 0.0; S(8): 100.0; T(11): 0.0	9.36137e+06	0	7.273e-07	60.16	2.04332e-05	2	1480.64	0.360451	22.8694	0
High	LTFDSSFsPNTGKK	1	1	1	P21796	S8(Phospho)	0	T(2): 0.0; S(5): 0.0; S(6): 0.0; S(8): 100.0; T(11): 0.0	8.27772e+06	0	2.381e-07	58.35	3.81628e-05	2	1608.73	2.38094	17.7079	1
High	sDAAVDTSSEITTK	2	1	1	P06454	N-Term(Acetyl); S1(Phospho)	0	S(1): 100.0; T(7): 0.0; S(8): 0.0; S(9): 0.0; T(12): 0.0; T(13): 0.0	2.25031e+07	0	0.0002406	24.6	0.0528774	2	1546.65	0.761994	22.1513	0
High	DAHDVsPTSTDTEAQLTVER	2	1	1	Q8IVF2	S6(Phospho)	0	S(6): 100.0; T(8): 0.0; S(9): 0.0; T(10): 0.0; T(12): 0.0; T(17): 0.0	8.28997e+06	0	9.53e-10	92.16	1.80616e-08	3	2251.97	-1.57267	18.3763	0
High	LQtPNtFPK	1	1	1	Q14978	T3(Phospho); T6(Phospho)	0	T(3): 100.0; T(6): 100.0	1.15036e+07	0.001	0.003699	36.78	0.0033583	2	1205.5	0.539909	20.3928	0
High	VADNsFDAK	1	1	1	Q14978	S5(Phospho)	0	S(5): 100.0	7.86441e+06	0	0.00202	32.64	0.00413822	2	1046.42	0.147887	9.93346	0
High	GKGsPRPQAPK	1	1	1	Q14978	S4(Phospho)	0	S(4): 100.0	1.43282e+07	0.001	0.006015	27.69	0.0279154	2	1202.61	1.59188	1.07423	2
High	VAGGAAPSKPAsAK	1	1	1	Q14978	S12(Phospho)	0	S(8): 0.0; S(12): 100.0	6.28474e+06	0	1.037e-06	68.09	3.46182e-06	2	1291.64	0.94531	6.00906	1
High	TQDPSsPGTTPPQAR	1	1	1	Q13112	S6(Phospho)	0	T(1): 0.0; S(5): 0.0; S(6): 100.0; T(9): 0.0; T(10): 0.0	1.34757e+07	0	2.666e-09	68.93	3.04493e-06	2	1619.7	-3.05786	11.0162	0
High	GSsPGPRPVEGTPASR	1	1	1	Q13112	S3(Phospho)	0	S(2): 0.0; S(3): 100.0; T(12): 0.0; S(15): 0.0	1.33419e+07	0	4.659e-09	49.24	0.000309723	3	1631.75	0.60217	9.21399	1
High	QGsPVAAGAPAK	1	1	1	Q9NZI8	S3(Phospho)	0	S(3): 100.0	3.52614e+07	0	2.311e-08	91.14	1.44597e-08	2	1133.54	0.493879	9.0582	0
High	VSLEPHQGPGtPESK	2	1	1	Q14980	T11(Phospho)	0	S(2): 0.0; T(11): 100.0; S(14): 0.0	1.12777e+07	0	5.496e-09	53.05	0.000115688	2	1642.75	4.19155	11.0836	0
High	TQPDGTSVPGEPAsPISQR	1	1	1	Q14980	S14(Phospho)	0	T(1): 0.0; T(6): 0.0; S(7): 0.0; S(14): 100.0; S(17): 0.0	4.53232e+07	0	1.295e-05	44.12	0.00118307	2	2003.92	7.83203	17.8828	0
High	APVPSTcSSTFPEELsPPSHQAK	1	1	1	Q14980	C7(Carbamidomethyl); S16(Phospho)	0	S(5): 0.0; T(6): 0.0; S(8): 0.0; S(9): 0.0; T(10): 0.0; S(16): 100.0; S(19): 0.0	6.3952e+07	0	5.508e-07	42.29	0.00211882	3	2534.13	1.63424	19.6429	0
High	GYLsEGLVTK	1	1	1	P31152	S4(Phospho)	0	Y(2): 0.0; S(4): 100.0; T(9): 0.0	2.48206e+06	0	9.693e-05	39.15	0.0022013	2	1146.54	0.608065	22.4826	0
High	VGsPSYLDK	1	1	1	P31152	S3(Phospho)	0	S(3): 100.0; S(5): 0.0; Y(6): 0.0	2.88283e+06	0.001	0.004415	29.83	0.00961926	2	1045.46	0.631997	14.1432	0
High	AGsAPLAEDVQVDPR	1	1	1	P31152	S3(Phospho)	0	S(3): 100.0	4.28077e+06	0	7.706e-09	70.25	2.7189e-06	2	1604.73	1.85977	21.769	0
High	STtPTSSPFR	1	1	1	Q9Y520	T3(Phospho)	0	S(1): 0.0; T(2): 0.0; T(3): 100.0; T(5): 0.0; S(6): 0.0; S(7): 0.0	2.99648e+06	0	0.0001385	38.17	0.00235466	2	1160.5	0.488295	14.3639	0
High	LPDLsPVENK	1	1	1	Q9Y520	S5(Phospho)	0	S(5): 100.0	7.28685e+06	0	4.841e-06	57.23	3.57653e-05	2	1191.57	0.793652	20.9881	0
High	sVEDVRPHHTDANNQSAcFEAPDQK	2	1	1	Q9Y520	S1(Phospho); C18(Carbamidomethyl)	0	S(1): 97.8; T(10): 2.2; S(16): 0.0	1.23684e+07	0	0.001011	20.57	0.303881	3	2932.24	1.87927	11.8832	1
High	GsPDGSLQTGKPSAPK	1	1	1	Q8IZL8	S2(Phospho)	0	S(2): 100.0; S(6): 0.0; T(9): 0.0; S(13): 0.0	2.13601e+07	0	1.686e-10	89.69	2.55609e-08	2	1606.75	0.632529	9.35384	1
High	KVSGTLDtPEK	1	1	1	Q9BYG3	T8(Phospho)	0	S(3): 0.0; T(5): 0.0; T(8): 100.0	3.19177e+06	0	0.002876	31.84	0.0143038	2	1254.6	2.36992	7.3492	1
High	EEIQETQtPTHSR	1	1	1	Q9BYG3	T8(Phospho)	0	T(6): 0.0; T(8): 100.0; T(10): 0.0; S(12): 0.0	2.22583e+06	0	8.144e-06	51.74	0.000162782	2	1635.7	2.10495	7.9395	0
High	VSGTLDtPEKTVDSQGPTPVcTPTFLER	3	1	1	Q9BYG3	T7(Phospho); C21(Carbamidomethyl)	0	S(2): 98.2; T(4): 1.8; T(7): 0.0; T(11): 0.0; S(14): 0.0; T(18): 0.0; T(22): 0.0; T(24): 0.0	3.33478e+07	0	9.282e-08	38.16	0.00557562	3	3112.46	1.52529	25.1491	1
High	VSGTLDtPEK	1	1	1	Q9BYG3	T7(Phospho)	0	S(2): 0.0; T(4): 0.0; T(7): 100.0	1.67132e+07	0	0.0007356	37.31	0.00410575	2	1126.5	0.579907	10.2957	0
High	sQVAELNDDDKDDEIVFK	2	1	1	Q9BYG3	S1(Phospho)	0	S(1): 100.0	1.3486e+07	0	0.001516	20.5	0.268267	2	2159.94	0.97727	21.8837	1
High	EPSAtPPISNLTK	1	1	1	P30622	T5(Phospho)	0	S(3): 50.0; T(5): 50.0; S(9): 0.0; T(12): 0.0	3.97937e+06	0.001	0.005176	14.35	0.822712	2	1434.69	1.70683	20.5308	0
High	AtSPLcTSTASMVSSSPSTPSNIPQKPSQPAAK	2	1	1	P30622	T2(Phospho); C6(Carbamidomethyl)	0	T(2): 50.0; S(3): 50.0; T(7): 0.0; S(8): 0.0; T(9): 0.0; S(11): 0.0; S(14): 0.0; S(15): 0.0; S(16): 0.0; S(18): 0.0; T(19): 0.0; S(21): 0.0; S(28): 0.0	2.18963e+07	0	7.433e-06	16.4	0.849912	3	3395.59	1.44576	19.5965	1
High	TASESISNLSEAGsIK	1	1	1	P30622	S14(Phospho)	0	T(1): 0.0; S(3): 0.0; S(5): 0.0; S(7): 0.0; S(10): 0.0; S(14): 100.0	1.13151e+07	0	5.231e-09	85.83	7.05284e-08	2	1673.76	1.07291	19.2384	0
High	sRIMELEK	1	1	1	P30622	S1(Phospho)	0	S(1): 100.0	3.24168e+06	0.005	0.06819	29.73	0.0183033	2	1085.51	0.69206	12.7864	1
High	sPSASSLSSMSSVASSVSSR	2	1	1	P30622	S1(Phospho)	0	S(1): 49.5; S(3): 49.5; S(5): 1.0; S(6): 0.0; S(8): 0.0; S(9): 0.0; S(11): 0.0; S(12): 0.0; S(15): 0.0; S(16): 0.0; S(18): 0.0; S(19): 0.0	2.51552e+06	0.001	0.003561	12.25	1.78103	2	1980.87	3.94778	23.4297	0
High	LGFSLtPSK	1	1	1	P38432	T6(Phospho)	0	S(4): 0.0; T(6): 99.2; S(8): 0.8	3.04836e+06	0	0.001472	40.08	0.00116337	2	1029.5	-0.16499	23.334	0
High	AFQLEEGEEtEPDcK	1	1	1	P38432	T10(Phospho); C14(Carbamidomethyl)	0	T(10): 100.0	2.98559e+07	0	6.905e-08	73.37	8.03148e-07	2	1861.72	2.51305	18.9952	0
High	NsSEKLPTELSK	2	1	1	P38432	S2(Phospho)	0	S(2): 50.0; S(3): 50.0; T(8): 0.0; S(11): 0.0	1.97059e+06	0.002	0.03326	10.77	2.03101	2	1412.67	1.1201	13.0387	1
High	AADsDDGAVSAPAASDGGVSK	1	1	1	Q96GM8	S4(Phospho)	0	S(4): 100.0; S(10): 0.0; S(15): 0.0; S(20): 0.0	1.96751e+07	0	2.532e-15	88.68	3.2389e-08	2	1927.79	1.57958	14.4398	0
High	sDQEAKPSTEDLGDKK	2	1	1	P63165	N-Term(Acetyl); S1(Phospho)	0	S(1): 100.0; S(8): 0.0; T(9): 0.0	5.30841e+07	0	2.291e-05	56.9	5.0533e-05	2	1869.82	4.89723	10.6183	2
High	SYsAGNASQLEQLSR	2	1	1	Q14678	S3(Phospho)	0	S(1): 0.8; Y(2): 0.8; S(3): 98.4; S(8): 0.0; S(14): 0.0	6.4363e+06	0	1.696e-12	88.02	3.86515e-08	2	1690.75	1.48032	20.4116	0
High	RSsDPALIGLSTSVSDSNFSSEEPSR	1	1	1	Q8TEW0	S3(Phospho)	0	S(2): 50.0; S(3): 50.0; S(11): 0.0; T(12): 0.0; S(13): 0.0; S(15): 0.0; S(17): 0.0; S(20): 0.0; S(21): 0.0; S(25): 0.0	1.68228e+07	0	1.508e-15	72.52	2.23623e-06	3	2805.26	0.794036	24.7743	1
High	FsPDSQYIDNR	1	1	1	Q8TEW0	S2(Phospho)	0	S(2): 100.0; S(5): 0.0; Y(7): 0.0	9.23046e+06	0	2.931e-05	41.97	0.000848167	2	1421.58	2.1098	18.5513	0
High	sPGSPPGPELPIETALDDR	2	1	1	Q8TEW0	S1(Phospho)	0	S(1): 98.6; S(4): 1.4; T(14): 0.0	4.16871e+06	0	0.001131	16.8	0.601717	2	2027.93	-1.00049	31.3318	0
High	SDKsPDLAPTPAPQSTPR	3	1	1	Q9BY44	S4(Phospho)	0	S(1): 0.0; S(4): 100.0; T(10): 0.0; S(15): 0.0; T(16): 0.0	3.97845e+07	0	6.176e-13	87.77	4.69576e-08	2	1944.91	1.72927	14.1734	1
High	EFItGDVEPTDAESEWHSENEEEEKLAGDmK	1	1	1	Q99733	T4(Phospho); M30(Oxidation)	0	T(4): 25.0; T(10): 25.0; S(14): 25.0; S(18): 25.0	3.13399e+07	0.003	0.03406	25.81	0.0910604	3	3647.48	-2.35815	22.8968	1
High	REFITGDVEPTDAESEWHsENEEEEK	1	1	1	Q99733	S19(Phospho)	0	T(5): 0.0; T(11): 0.0; S(15): 0.0; S(19): 100.0	1.43289e+07	0	0.0004032	21.15	0.258985	3	3172.3	3.83731	19.1976	1
High	EFITGDVEPTDAESEWHsENEEEEK	1	1	1	Q99733	S18(Phospho)	0	T(4): 0.0; T(10): 0.0; S(14): 0.0; S(18): 100.0	2.83768e+08	0	8.501e-10	33.43	0.0133459	3	3016.19	0.894313	22.7316	0
High	EFITGDVEPTDAEsEWHSENEEEEKLAGDMK	2	1	1	Q99733	S14(Phospho)	0	T(4): 0.0; T(10): 49.5; S(14): 49.5; S(18): 1.0	3.80939e+07	0	1.119e-07	15.28	1.1044	3	3631.5	1.23976	24.5279	1
High	aDHsFSDGVPSDSVEAAK	3	1	1	Q99733	N-Term(Acetyl); S4(Phospho)	0	S(4): 99.0; S(6): 1.0; S(11): 0.0; S(13): 0.0	1.52604e+07	0	7.202e-09	59.08	2.8674e-05	2	1940.79	0.888765	20.9475	0
High	PAtPGASSVEQLR	1	1	1	Q9H3U1	T3(Phospho)	0	T(3): 100.0; S(7): 0.0; S(8): 0.0	1.39319e+07	0	2.136e-08	87.57	4.06839e-08	2	1392.65	-0.298311	16.6319	0
High	EVDKtPPPQPPLISSMDSISQK	1	1	1	Q92625	T5(Phospho)	0	T(5): 100.0; S(14): 0.0; S(15): 0.0; S(18): 0.0; S(20): 0.0	0	0	0.001859	15.28	0.936887	3	2474.18	-1.96564	24.5581	1
High	SEsLSNcSIGK	1	1	1	Q92625	S3(Phospho); C7(Carbamidomethyl)	0	S(1): 0.0; S(3): 100.0; S(5): 0.0; S(8): 0.0	4.24272e+06	0	2.27e-05	46.64	0.000275298	2	1261.51	-1.79667	12.7455	0
High	SPsFASEWDEIEK	2	1	1	Q92625	S3(Phospho)	0	S(1): 0.7; S(3): 99.3; S(6): 0.0	7.4858e+06	0	3.844e-07	64.75	5.89539e-06	2	1604.65	0.13758	27.0441	0
High	QVAEQGGDLsPAANR	1	1	1	O94804	S10(Phospho)	0	S(10): 100.0	1.06598e+07	0	2.965e-08	75.31	6.93411e-07	2	1592.71	0.809295	12.6571	0
High	LSEEAEcPNPsTPSK	1	1	1	O94804	C7(Carbamidomethyl); S11(Phospho)	0	S(2): 0.0; S(11): 49.7; T(12): 49.7; S(14): 0.7	8.44585e+06	0	6.448e-05	33.97	0.0088792	2	1725.71	1.33626	12.0947	0
High	LESLYsDEEDESAVGADK	1	1	1	Q9UP95	S6(Phospho)	0	S(3): 1.1; Y(5): 1.1; S(6): 97.9; S(12): 0.0	1.35168e+07	0	1.216e-09	86.14	4.9617e-08	2	2036.82	0.597738	21.5252	0
High	KFQEQEcPPsPEPTRK	1	1	1	P62070	C7(Carbamidomethyl); S10(Phospho)	0	S(10): 100.0; T(14): 0.0	2.14001e+07	0	0.0001957	14.89	0.94545	3	2037.91	0.964299	8.59237	2
High	FQEQEcPPsPEPTR	1	1	1	P62070	C6(Carbamidomethyl); S9(Phospho)	0	S(9): 100.0; T(13): 0.0	2.35828e+07	0	8.937e-08	76.3	4.80567e-07	2	1781.72	1.17822	14.2585	0
High	FQEQEcPPsPEPTRK	1	1	1	P62070	C6(Carbamidomethyl); S9(Phospho)	0	S(9): 100.0; T(13): 0.0	6.62241e+06	0	0.00124	34.85	0.00942741	2	1909.82	2.18616	11.2987	1
High	RTStPVIMEGVQEETDTR	1	1	1	Q8NFC6	T4(Phospho)	0	T(2): 0.9; S(3): 0.9; T(4): 98.1; T(15): 0.0; T(17): 0.0	2.93603e+06	0	4.337e-08	53.81	0.000137874	3	2128.96	0.0675473	19.0638	1
High	DKDVTLsPVK	1	1	1	Q8NFC6	S7(Phospho)	0	T(5): 0.0; S(7): 100.0	9.44947e+06	0	3.099e-05	55.05	6.11149e-05	2	1181.58	0.365957	13.1864	1
High	TQLsPSIK	1	1	1	Q8NFC6	S4(Phospho)	0	T(1): 0.0; S(4): 100.0; S(6): 0.0	3.11933e+06	0.001	0.01852	28.8	0.0185874	2	953.47	-0.435287	13.839	0
High	RPsQNAISFFNVGHSK	1	1	1	Q9BXB4	S3(Phospho)	0	S(3): 100.0; S(8): 0.0; S(15): 0.0	7.6477e+06	0	7.09e-07	37.1	0.00531333	3	1868.88	0.104903	18.0505	1
High	SFSLASSSNsPISQR	1	1	1	Q9BXB4	S10(Phospho)	0	S(1): 0.0; S(3): 0.0; S(6): 0.0; S(7): 0.0; S(8): 0.0; S(10): 99.0; S(13): 1.0	9.48894e+06	0	1.704e-09	70.38	2.24016e-06	2	1647.74	0.822236	19.8114	0
High	HFSEHPsTSK	2	1	1	O43719	S7(Phospho)	0	S(3): 100.0; S(7): 0.0; T(8): 0.0; S(9): 0.0	1.06456e+07	0.002	0.02725	29.04	0.0203324	2	1236.51	0.823662	5.12272	0
High	DLDEEGsEKELHENVLDK	1	1	1	O43719	S7(Phospho)	0	S(7): 100.0	1.56721e+07	0	5.953e-06	23.4	0.143297	3	2178.95	1.06927	15.7797	1
High	VFDDEsDEKEDEEYADEK	2	1	1	O43719	S6(Phospho)	0	S(6): 100.0; Y(14): 0.0	1.71694e+07	0	9.078e-09	71.73	8.46e-07	2	2271.84	2.47851	14.6152	1
High	LFEEsDDKEDEDADGKEVEDADEK	1	1	1	O43719	S5(Phospho)	0	S(5): 100.0	2.73113e+07	0	3.418e-07	34.37	0.00926783	3	2837.11	0.518105	14.5028	2
High	RGFEGScsQKESEEGNPVR	2	1	1	O43719	C7(Carbamidomethyl); S8(Phospho)	0	S(6): 1.9; S(8): 96.2; S(12): 1.9	2.04245e+06	0.001	0.005899	12.95	1.48548	3	2232.94	0.710169	8.35097	2
High	EEDEPEERsGDETPGSEVPGDK	1	1	1	Q1KMD3	S9(Phospho)	0	S(9): 100.0; T(13): 0.0; S(16): 0.0	3.05596e+07	0	4.345e-09	39.63	0.00283122	3	2467.96	0.494642	12.5784	1
High	REEDEPEERsGDETPGSEVPGDK	2	1	1	Q1KMD3	S10(Phospho)	0	S(10): 50.0; T(14): 50.0; S(17): 0.0	2.99618e+07	0	3.268e-06	20.2	0.297958	3	2624.07	2.05269	10.4611	2
High	sGDETPGSEVPGDK	1	1	1	Q1KMD3	S1(Phospho)	0	S(1): 100.0; T(5): 0.0; S(8): 0.0	1.26926e+07	0	1.384e-09	71.14	1.07678e-06	2	1454.56	-2.39616	12.5665	0
High	EVYELLDsPGK	1	1	1	P22234	S8(Phospho)	0	Y(3): 0.0; S(8): 100.0	1.20001e+07	0	5.867e-06	45.67	0.00056101	2	1329.6	0.655762	23.3297	0
High	TKEVYELLDsPGK	1	1	1	P22234	S10(Phospho)	0	T(1): 0.0; Y(5): 0.0; S(10): 100.0	7.5701e+06	0	3.594e-05	44.52	0.000792896	2	1558.74	2.94096	19.4151	1
High	ESYDAPPtPSGAR	1	1	1	Q96S55	T8(Phospho)	0	S(2): 0.0; Y(3): 0.0; T(8): 50.0; S(10): 50.0	8.08806e+06	0	0.00027	37.78	0.00317611	2	1427.58	0.504366	13.7891	0
High	AKGPsPPGAK	1	1	1	Q96S55	S5(Phospho)	0	S(5): 100.0	7.91146e+06	0	5.2e-05	41.15	0.00130835	2	989.482	0.229233	5.71946	1
High	RPAAAAAAGSAsPR	1	1	1	Q96S55	S12(Phospho)	0	S(10): 0.0; S(12): 100.0	3.13863e+07	0	2.988e-05	57.98	3.31179e-05	2	1333.64	1.2307	6.11872	1
High	GsPATSPHLGR	1	1	1	Q13671	S2(Phospho)	0	S(2): 100.0; T(5): 0.0; S(6): 0.0	2.21615e+06	0	0.0005184	39.6	0.00189142	2	1159.53	1.42901	8.16348	0
High	sMSAAFcSLLAPER	2	1	1	Q13671	S1(Phospho); C7(Carbamidomethyl)	0	S(1): 50.0; S(3): 50.0; S(8): 0.0	5.28131e+06	0	1.158e-07	71.49	1.5185e-06	2	1619.7	-0.363199	32.0286	0
High	tSPQVLGSILK	2	1	1	Q7Z417	T1(Phospho)	0	T(1): 50.0; S(2): 50.0; S(8): 0.0	8.4713e+06	0	0.0003497	28.61	0.0243077	2	1222.65	0.800699	26.4422	0
High	GADNDGsGSESGYTTPK	1	1	1	Q7Z417	S7(Phospho)	0	S(7): 100.0; S(9): 0.0; S(11): 0.0; Y(13): 0.0; T(14): 0.0; T(15): 0.0	7.13522e+06	0	6.485e-06	29.19	0.0151835	2	1722.64	-2.91513	10.4904	0
High	NDsWGSFDLR	1	1	1	Q7Z417	S3(Phospho)	0	S(3): 100.0; S(6): 0.0	7.32085e+06	0	9.125e-05	49.45	0.000123149	2	1276.5	0.171632	26.3916	0
High	RTsPQVLGSILK	1	1	1	Q7Z417	S3(Phospho)	0	T(2): 50.0; S(3): 50.0; S(9): 0.0	1.05806e+07	0	1.378e-07	39.67	0.00152131	2	1378.75	1.20806	20.3274	1
High	DYEIESQNPLAsPTNTLLGSAK	1	1	1	Q7Z417	S12(Phospho)	0	Y(2): 0.0; S(6): 0.0; S(12): 96.7; T(14): 1.7; T(16): 1.7; S(20): 0.0	25457257	0	5.146e-10	37.58	0.00569138	2	2428.14	6.81448	32.689	0
High	RSsLPLDHGSPAQENPESEK	1	1	1	Q5VZ89	S3(Phospho)	0	S(2): 1.2; S(3): 98.8; S(10): 0.0; S(18): 0.0	1.5245e+07	0	1.64e-09	55.12	9.95117e-05	3	2258.01	0.91318	11.9864	1
High	ScsFSSESR	1	1	1	Q5VZ89	C2(Carbamidomethyl); S3(Phospho)	0	S(1): 0.0; S(3): 100.0; S(5): 0.0; S(6): 0.0; S(8): 0.0	1.49449e+06	0	8.042e-05	48.74	6.14834e-05	2	1126.39	1.64003	8.45742	0
High	sIQDLTVTGTEPGQVSSR	1	1	1	O43318	S1(Phospho)	0	S(1): 100.0; T(6): 0.0; T(8): 0.0; T(10): 0.0; S(16): 0.0; S(17): 0.0	8.96675e+06	0	1.103e-09	83.99	1.16116e-07	2	1954.91	0.858067	22.7819	0
High	sFTPDHVVYAR	2	1	1	Q6NZI2	S1(Phospho)	0	S(1): 50.0; T(3): 50.0; Y(9): 0.0	2.70117e+06	0	0.0005765	22.88	0.108456	2	1371.61	1.84579	16.9786	0
High	YsGAYGASVSDEELK	1	1	1	Q9NX63	S2(Phospho)	0	Y(1): 50.0; S(2): 50.0; Y(5): 0.0; S(8): 0.0; S(10): 0.0	2.29299e+07	0	2.02e-10	83.73	8.70586e-08	2	1655.69	1.2226	18.9449	0
High	SPSPPDGsPAATPEIR	4	1	1	O00499	S8(Phospho)	0	S(1): 0.0; S(3): 0.0; S(8): 100.0; T(12): 0.0	2.40126e+07	0	1.351e-07	57.47	5.13009e-05	2	1658.75	2.64497	17.1485	0
High	GNKsPSPPDGSPAATPEIR	1	1	1	O00499	S4(Phospho)	0	S(4): 98.6; S(6): 1.4; S(11): 0.0; T(15): 0.0	4.5733e+06	0	2.168e-05	18.73	0.366402	2	1957.91	1.89424	13.6725	1
High	VNHEPEPAGGATPGATLPKsPSQLR	1	1	1	O00499	S20(Phospho)	0	T(12): 0.0; T(16): 0.0; S(20): 98.2; S(22): 1.8	1.38136e+07	0	9.305e-05	13.45	1.34201	3	2591.26	0.434188	15.6636	1
High	sPSQLR	1	1	1	O00499	S1(Phospho)	0	S(1): 100.0; S(3): 0.0	3.98455e+06	0.009	0.1082	34.05	0.00369937	2	767.345	-0.236197	6.42763	0
High	SStPLPTISSSAENTR	3	2	2	P42166;P42167	T3(Phospho)	0.0175	S(1): 0.0; S(2): 0.0; T(3): 100.0; T(7): 0.0; S(9): 0.0; S(10): 0.0; S(11): 0.0; T(15): 0.0	1.75635e+08	0	6.164e-07	56.18	6.48265e-05	2	1727.79	1.42769	18.6999	0
High	GPPDFSSDEEREPtPVLGSGAAAAGR	4	2	2	P42166;P42167	T14(Phospho)	0	S(6): 0.0; S(7): 0.0; T(14): 100.0; S(19): 0.0	1.0887e+08	0	5.978e-13	21.71	0.259356	3	2650.18	0.769257	20.466	1
High	GPPDFsSDEEREPtPVLGSGAAAAGR	2	2	2	P42166;P42167	S6(Phospho); T14(Phospho)	0	S(6): 50.7; S(7): 50.7; T(14): 98.6; S(19): 0.0	1.30224e+08	0	2.429e-06	15.59	0.95516	3	2730.15	1.23035	24.572	1
High	HAsPILPITEFSDIPR	1	1	1	P42167	S3(Phospho)	0	S(3): 100.0; T(9): 0.0; S(12): 0.0	5.23852e+06	0	1.203e-07	56.08	5.91849e-05	3	1872.93	-0.320544	28.9025	0
High	EAAAGIQWsEEEtEDEEEEKEVTPESGPPK	1	1	1	P46087	S9(Phospho); T13(Phospho)	0	S(9): 100.0; T(13): 100.0; T(23): 0.0; S(26): 0.0	9.11107e+07	0	1.056e-09	47.75	0.000486014	3	3490.4	-0.805152	23.9544	1
High	GPQPPTVsPIR	1	1	1	P46087	S8(Phospho)	0	T(6): 0.0; S(8): 100.0	5.85798e+07	0	0.0006561	38.48	0.00325674	2	1228.61	0.651386	17.2213	0
High	TNKsPEAKPLPGK	2	1	1	P46087	S4(Phospho)	0	T(1): 0.0; S(4): 100.0	1.15405e+07	0	0.0001169	28.06	0.0328261	3	1446.74	-0.0409011	5.95694	2
High	GTDTQTPAVLsPSK	1	1	1	P46087	S11(Phospho)	0	T(2): 0.0; T(4): 0.0; T(6): 0.0; S(11): 50.0; S(13): 50.0	8.4407e+07	0	0.0001497	27.36	0.0410466	2	1481.69	0.912853	16.245	0
High	LGAGGGsPEK	1	1	1	Q9UNE7	S7(Phospho)	0	S(7): 100.0	1.28185e+07	0	3.033e-05	53.51	4.07775e-05	2	952.413	-0.374515	6.61403	0
High	LGAGGGsPEKSPSAQELK	1	1	1	Q9UNE7	S7(Phospho)	0	S(7): 100.0; S(11): 0.0; S(13): 0.0	5.95508e+07	0	6.093e-08	53.74	0.000124687	2	1792.85	1.99886	11.5901	1
High	PLPTFPTsEcTSDVEPDTR	5	1	1	Q8TDD1	S8(Phospho); C10(Carbamidomethyl)	0	T(4): 0.0; T(7): 0.4; S(8): 33.2; T(11): 33.2; S(12): 33.2; T(18): 0.0	2.18392e+07	0	6.701e-07	36.98	0.00613368	2	2228.95	2.57568	25.7584	0
High	GsDsEDGEFEIQAEDDAR	1	1	1	Q8TDD1	S2(Phospho); S4(Phospho)	0	S(2): 100.0; S(4): 100.0	3.84595e+06	0	0.0007028	22.65	0.0407438	2	2129.73	3.13376	26.893	0
High	LGPGRPLPTFPTSEcTsDVEPDTR	1	1	1	Q8TDD1	C15(Carbamidomethyl); S17(Phospho)	0	T(9): 0.0; T(12): 0.0; S(13): 0.0; T(16): 1.5; S(17): 98.5; T(23): 0.0	5.31475e+07	0	5.97e-11	68.93	5.11113e-06	3	2709.22	0.441014	23.4005	1
High	FGESEEVEMEVEsDEEDDKQEK	2	1	1	Q15459	S13(Phospho)	0	S(4): 0.0; S(13): 100.0	1.19269e+08	0	2.234e-11	66.08	4.79645e-06	3	2697.03	0.181079	18.5742	1
High	FGESEEVEmEVEsDEEDDKQEK	1	1	1	Q15459	M9(Oxidation); S13(Phospho)	0	S(4): 50.0; S(13): 50.0	6.40792e+07	0	2.37e-05	34.87	0.00640269	3	2713.02	-0.262897	16.8604	1
High	LQEEGGGsDEEETGSPSEDGMQSAR	2	1	1	Q13610	S8(Phospho)	0	S(8): 97.0; T(13): 1.5; S(15): 1.5; S(17): 0.0; S(23): 0.0	1.32124e+07	0	1.319e-09	44.49	0.000700594	3	2662.01	0.914625	14.5947	0
High	EKLQEEGGGsDEEETGSPSEDGmQSAR	1	1	1	Q13610	S10(Phospho); M23(Oxidation)	0	S(10): 99.9; T(15): 0.0; S(17): 0.0; S(19): 0.0; S(25): 0.0	7.34001e+06	0	6.753e-08	46.1	0.000640679	3	2935.15	1.35698	10.7536	1
High	SSsPAGETEGDREPQAR	4	1	1	Q9BTC0	S3(Phospho)	0	S(1): 0.0; S(2): 0.0; S(3): 100.0; T(8): 0.0	9.58034e+06	0	4.295e-06	34.07	0.00944098	3	1853.77	0.151769	7.2985	1
High	RNsVERPAEPVAGAATPSLVEQQK	1	1	1	Q9BTC0	S3(Phospho)	0	S(3): 100.0; T(16): 0.0; S(18): 0.0	4.31376e+07	0	9.644e-13	40.64	0.0021143	3	2614.31	2.64422	15.7309	2
High	HDSSAPDPAPDsADEVMPEAVPEVASEPGLESASHPNVDR	1	1	1	Q9BTC0	S12(Phospho)	0	S(3): 0.0; S(4): 0.0; S(12): 96.3; S(26): 3.5; S(32): 0.1; S(34): 0.1	6.02277e+06	0	7.956e-05	10.26	3.53209	4	4188.8	1.21153	24.8743	0
High	QEAIPDLEDsPPVsDSEEQQESAR	3	1	1	Q9BTC0	S10(Phospho); S14(Phospho)	0	S(10): 66.7; S(14): 66.7; S(16): 66.7; S(22): 0.0	1.35096e+07	0	1.384e-05	23.35	0.142182	3	2816.12	-0.0436824	28.0612	0
High	sPPEGDTTLFLSR	1	1	1	Q9BTC0	S1(Phospho)	0	S(1): 100.0; T(7): 0.0; T(8): 0.0; S(12): 0.0	1.60368e+07	0	3.837e-08	59.71	2.25036e-05	2	1499.68	0.617623	25.6431	0
High	HGsLGFLPR	1	1	1	P39023	S3(Phospho)	0	S(3): 100.0	2.69009e+06	0	0.0006456	33.99	0.00586567	2	1063.51	0.543956	18.3416	0
High	TVFsPTLPAAR	1	1	1	Q7Z2W4	S4(Phospho)	0	T(1): 0.0; S(4): 100.0; T(6): 0.0	1.88385e+07	0	0.0007112	35.49	0.00638423	2	1239.61	0.949692	24.4856	0
High	AsLEDAPVDDLTR	1	1	1	Q7Z2W4	S2(Phospho)	0	S(2): 100.0; T(12): 0.0	1.80111e+07	0	5.192e-06	55.94	6.1506e-05	2	1481.66	3.29742	23.5058	0
High	sSLGSLQTPEAVTTR	2	1	1	Q7Z2W4	S1(Phospho)	0	S(1): 49.6; S(2): 49.6; S(5): 0.9; T(8): 0.0; T(13): 0.0; T(14): 0.0	3.40188e+06	0	5.952e-05	34.3	0.00876823	2	1626.78	1.02767	21.5525	0
High	SctPsPDQISHR	1	1	1	Q7Z2W4	C2(Carbamidomethyl); T3(Phospho); S5(Phospho)	0	S(1): 0.0; T(3): 100.0; S(5): 100.0; S(10): 0.0	5.20458e+06	0	0.0003148	33.43	0.00485718	2	1544.56	-0.468437	12.7301	0
High	ScTPsPDQISHR	1	1	1	Q7Z2W4	C2(Carbamidomethyl); S5(Phospho)	0	S(1): 0.0; T(3): 0.0; S(5): 100.0; S(10): 0.0	4.37599e+06	0.001	0.004142	19.38	0.212235	2	1464.59	-0.228672	10.6458	0
High	ANsFVGTAQYVSPELLTEK	1	2	1	Q6A1A2	S3(Phospho)	0	S(3): 100.0; T(7): 0.0; Y(10): 0.0; S(12): 0.0; T(17): 0.0	1.7909e+07	0	7.192e-11	82.52	1.74924e-07	2	2134.01	1.17841	29.5694	0
High	PIPNQPPTAAHTANFLLNASGSTStPAPSR	4	1	1	P53396	T25(Phospho)	0	T(8): 0.0; T(12): 0.0; S(20): 0.1; S(22): 2.1; T(23): 2.1; S(24): 2.1; T(25): 91.7; S(29): 2.1	1.90089e+07	0	1.942e-06	18.19	0.4627	3	3095.51	4.92668	23.7792	0
High	TAsFSESR	1	1	1	P53396	S3(Phospho)	0	T(1): 0.0; S(3): 100.0; S(5): 0.0; S(7): 0.0	8.16479e+07	0.001	0.009761	51.34	7.7124e-05	2	964.377	0.234006	8.61519	0
High	AKPAMPQDSVPsPR	1	1	1	P53396	S12(Phospho)	0	S(9): 0.0; S(12): 100.0	3.00067e+07	0	4.4e-06	55.65	6.68423e-05	2	1560.73	0.831085	12.5199	1
High	AKPAmPQDSVPsPR	1	1	1	P53396	M5(Oxidation); S12(Phospho)	0	S(9): 0.0; S(12): 100.0	1.31743e+07	0	0.002801	23	0.111264	2	1576.72	0.950887	9.41987	1
High	PAmPQDSVPsPR	1	1	1	P53396	M3(Oxidation); S10(Phospho)	0	S(7): 1.0; S(10): 99.0	1.88581e+06	0.001	0.01038	13.2	0.839996	2	1377.59	0.741095	12.7336	0
High	LVSFHDDsDEDLLHI	1	1	1	P11717	S8(Phospho)	0	S(3): 0.0; S(8): 100.0	5.19548e+07	0	7.878e-08	42.31	0.0014041	2	1834.79	1.21177	28.1329	0
High	ALSSLHGDDQDsEDEVLTIPEVK	2	1	1	P11717	S12(Phospho)	0	S(3): 0.0; S(4): 1.3; S(12): 98.7; T(18): 0.0	1.09191e+08	0	1.388e-11	38.12	0.00602034	3	2577.17	3.65234	25.6209	0
High	NDsPTQIPVSSDVcR	1	1	1	Q8TC07	S3(Phospho); C14(Carbamidomethyl)	0	S(3): 100.0; T(5): 0.0; S(10): 0.0; S(11): 0.0	1.20193e+07	0	1.153e-07	53.67	0.000108243	2	1754.74	1.14066	19.679	0
High	KDsSSVVEWTQAPK	2	1	1	Q8TC07	S3(Phospho)	0	S(3): 99.3; S(4): 0.7; S(5): 0.0; T(10): 0.0	4.22192e+06	0	8.915e-06	55.65	6.43919e-05	2	1641.76	3.97758	16.7949	1
High	GDTVSAsPcSAPLAR	1	1	1	Q15477	S7(Phospho); C9(Carbamidomethyl)	0	T(3): 0.0; S(5): 0.0; S(7): 100.0; S(10): 0.0	3.68572e+06	0	6.676e-07	54.85	6.74322e-05	2	1568.68	0.240804	17.0748	0
High	ASsLEDLVLK	1	1	1	Q15477	S3(Phospho)	0	S(2): 0.0; S(3): 100.0	2.45863e+07	0	0.0003673	53.46	9.33191e-05	2	1154.57	0.616931	26.2267	0
High	DRtPPLLYR	1	1	1	Q96T37	T3(Phospho)	0	T(3): 100.0; Y(8): 0.0	2.90377e+07	0.002	0.02622	29.57	0.0251178	2	1210.6	-0.481243	17.5923	1
High	TTAPTEGKsPLK	1	1	1	Q96T37	S9(Phospho)	0	T(1): 0.0; T(2): 0.0; T(5): 0.0; S(9): 100.0	2.86038e+06	0	0.001028	27	0.0421	2	1309.64	0.993135	7.67873	1
High	TTAPTEGKsPLKK	2	1	1	Q96T37	S9(Phospho)	0	T(1): 0.0; T(2): 0.0; T(5): 0.0; S(9): 100.0	4.78031e+06	0	2.653e-05	27.05	0.0400402	3	1437.73	-1.14192	6.07064	2
High	LLLERPsPIRDR	1	1	1	Q96T37	S7(Phospho)	0	S(7): 100.0	2.04311e+07	0.001	0.005386	13.9	0.580517	3	1544.83	0.733479	14.9532	2
High	LHSYSsPSTK	1	1	1	Q96T37	S6(Phospho)	0	S(3): 0.0; Y(4): 0.0; S(5): 0.0; S(6): 99.4; S(8): 0.6; T(9): 0.0	6.84476e+06	0.001	0.01453	34.55	0.00548927	2	1186.51	0.267612	6.15597	0
High	SRsPLDKDTyPPSASVVGASVGGHR	7	1	1	Q96T37	S3(Phospho); Y10(Phospho)	0	S(1): 99.9; S(3): 99.9; T(9): 0.1; Y(10): 0.1; S(13): 0.0; S(15): 0.0; S(20): 0.0	3.17667e+07	0	0.0001014	15.32	1.1545	3	2700.22	1.66022	17.5146	2
High	SLsPGGAALGYR	1	1	1	Q96T37	S3(Phospho)	0	S(1): 0.0; S(3): 100.0; Y(11): 0.0	3.41859e+07	0	1.176e-05	56.49	4.07265e-05	2	1228.57	0.165228	19.8097	0
High	HcAPsPDRsPELSSSR	2	1	1	Q96T37	C2(Carbamidomethyl); S5(Phospho); S9(Phospho)	0	S(5): 100.0; S(9): 100.0; S(13): 0.0; S(14): 0.0; S(15): 0.0	1.99233e+07	0	3.608e-07	24.25	0.057879	3	1942.75	0.592646	9.41611	1
High	TPEELDDsDFETEDFDVR	2	1	1	P35221	S8(Phospho)	0	T(1): 0.0; S(8): 100.0; T(12): 0.0	1.77e+08	0	9.098e-12	81.89	1.19398e-07	2	2238.86	0.75376	27.9347	0
High	NVPQEESLEDsDVDADFK	1	1	1	O00505	S11(Phospho)	0	S(7): 0.0; S(11): 100.0	4.46954e+07	0	1.027e-09	81.6	1.42863e-07	2	2116.87	2.71613	22.8728	0
High	SHHAPMsPGSSGGGGQPLAR	1	1	1	O14497	S7(Phospho)	0	S(1): 1.6; S(7): 98.4; S(10): 0.0; S(11): 0.0	4.58916e+06	0	2.781e-09	58.41	3.75671e-05	3	1967.85	0.341126	9.52467	0
High	GPsPSPVGSPASVAQSR	1	1	1	O14497	S3(Phospho)	0	S(3): 100.0; S(5): 0.0; S(9): 0.0; S(12): 0.0; S(16): 0.0	5.82207e+06	0	1.478e-06	35.08	0.00777692	2	1660.77	3.50899	16.8535	0
High	SHHAPmsPGSSGGGGQPLAR	1	1	1	O14497	M6(Oxidation); S7(Phospho)	0	S(1): 0.0; S(7): 100.0; S(10): 0.0; S(11): 0.0	2.17395e+06	0	6.636e-07	34.07	0.0107533	3	1983.85	-0.175028	7.0849	0
High	VQIsPDSGGLPER	1	1	1	Q92945	S4(Phospho)	0	S(4): 100.0; S(7): 0.0	6.32571e+06	0	5.939e-08	59.95	2.32157e-05	2	1434.66	0.0857031	18.6886	0
High	GsPQQIDHAK	1	1	1	Q92945	S2(Phospho)	0	S(2): 100.0	1.38863e+06	0	6.634e-05	47.52	0.000314194	2	1160.51	-0.25623	5.58353	0
High	EAALPPVsPLK	1	1	1	Q04637	S8(Phospho)	0	S(8): 100.0	6.68329e+07	0	0.000806	47.12	0.000296956	2	1201.62	0.481336	23.2176	0
High	SFsKEVEER	1	1	1	Q04637	S3(Phospho)	0	S(1): 0.0; S(3): 100.0	7.19204e+07	0.003	0.03469	45.29	0.000464408	2	1190.51	0.919828	10.3214	1
High	AAsLTEDRDR	1	1	1	Q04637	S3(Phospho)	0	S(3): 100.0; T(5): 0.0	3.64476e+07	0.001	0.01844	38.49	0.00196087	2	1213.52	0.393568	6.64938	1
High	PGWLSsPTLGR	1	1	1	Q5XPI4	S6(Phospho)	0	S(5): 0.0; S(6): 100.0; T(8): 0.0	4.45824e+06	0	7.829e-08	80.98	1.61993e-07	2	1250.59	0.464706	25.2708	0
High	SQsLPNSLDYTQTSDPGR	2	1	1	Q96TC7	S3(Phospho)	0	S(1): 0.9; S(3): 99.1; S(7): 0.0; Y(10): 0.0; T(11): 0.0; T(13): 0.0; S(14): 0.0	3.73704e+07	0	1.256e-10	80.97	2.52748e-07	2	2045.89	3.89828	21.483	0
High	NWTEDMEGGISsPVKK	2	1	1	P08651	S12(Phospho)	0	T(3): 0.0; S(11): 0.0; S(12): 100.0	2.20423e+07	0	1.777e-09	80.96	2.20061e-07	2	1857.81	0.818223	18.7017	1
High	TEMDKSPFNsPsPQDSPR	1	1	1	P08651	S10(Phospho); S12(Phospho)	0	T(1): 49.3; S(6): 49.3; S(10): 1.5; S(12): 99.9; S(16): 0.0	5.36346e+06	0	3.124e-05	24.58	0.0625265	3	2179.84	0.318971	17.1246	1
High	NWTEDmEGGIsSPVKK	2	1	1	P08651	M6(Oxidation); S11(Phospho)	0	T(3): 0.0; S(11): 50.0; S(12): 50.0	9.60578e+06	0	0.0005183	13.52	1.32722	2	1873.81	2.09176	14.3167	1
High	TEmDKsPFNSPSPQDSPR	1	1	1	P08651	M3(Oxidation); S6(Phospho)	0	T(1): 0.0; S(6): 98.7; S(10): 1.3; S(12): 0.0; S(16): 0.0	5.02181e+06	0	1.271e-05	12.04	1.51917	3	2115.87	0.60784	12.5852	1
High	KLEDVKNsPTFK	1	1	1	P55327	S8(Phospho)	0	S(8): 100.0; T(10): 0.0	7.02314e+06	0	6.941e-07	60.56	2.20635e-05	3	1485.74	0.4355	9.30002	2
High	NSPTFKsFEEK	1	1	1	P55327	S7(Phospho)	0	S(2): 0.0; T(4): 0.0; S(7): 100.0	3.90233e+06	0	0.002283	46.69	0.000424292	2	1393.6	-0.283644	13.3876	1
High	TQtPPLGQTPQLGLK	1	1	1	P78344	T3(Phospho)	0	T(1): 0.0; T(3): 100.0; T(9): 0.0	6.4308e+07	0	1.141e-10	80.72	1.69022e-07	2	1658.85	1.24113	24.2118	0
High	NsPGSQVASNPR	1	1	1	Q9H0D6	S2(Phospho)	0	S(2): 100.0; S(5): 0.0; S(9): 0.0	1.41411e+07	0	8.101e-09	80.63	1.43585e-07	2	1293.56	1.62351	8.10773	0
High	INKTSPVtASDPAGPSYAAATLQASSAASSASPVSR	7	1	1	P18887	T8(Phospho)	0	T(4): 14.3; S(5): 14.3; T(8): 14.3; S(10): 14.3; S(16): 14.3; Y(17): 14.3; T(21): 14.3; S(25): 0.0; S(26): 0.0; S(29): 0.0; S(30): 0.0; S(32): 0.0; S(35): 0.0	0	0	1.89e-06	38.58	0.00377198	3	3498.71	8.77447	22.7443	1
High	AIGSTSKPQEsPK	1	1	1	P18887	S11(Phospho)	0	S(4): 0.0; T(5): 0.0; S(6): 0.0; S(11): 100.0	6.97763e+06	0	2.013e-09	66.85	4.92593e-06	2	1409.67	1.57405	6.24326	1
High	AVTIANSPsKPSEK	2	1	1	Q8NEF9	S9(Phospho)	0	T(3): 0.0; S(7): 99.4; S(9): 0.6; S(12): 0.0	16607766	0	1.817e-08	57.46	4.11891e-05	2	1508.74	1.10688	8.63364	1
High	VATLNsEEESDPPTYK	1	1	1	Q00341	S6(Phospho)	0	T(3): 0.0; S(6): 100.0; S(10): 0.0; T(14): 0.0; Y(15): 0.0	1.42682e+07	0	2.098e-11	80.19	2.73758e-07	2	1859.8	2.30428	17.0141	0
High	TVtPASSAK	1	1	1	Q16555	T3(Phospho)	0	T(1): 0.0; T(3): 100.0; S(6): 0.0; S(7): 0.0	3.71936e+06	0.001	0.004105	37.4	0.00344833	2	941.436	2.15566	6.3456	0
High	GLYDGPVcEVSVtPK	1	1	1	Q16555	C8(Carbamidomethyl); T13(Phospho)	0	Y(3): 0.0; S(11): 0.0; T(13): 100.0	1.8374e+07	0	8.259e-08	66.97	5.12319e-06	2	1700.76	1.14435	24.3517	0
High	GyTSDDDTWEPEIHLEDcK	2	1	1	Q99549	Y2(Phospho); C18(Carbamidomethyl)	0	Y(2): 48.8; T(3): 48.8; S(4): 1.2; T(8): 1.2	5.2264e+06	0	0.0001421	24.55	0.0669936	2	2389.92	2.17844	24.7777	0
High	GAEAFGDsEEDGEDVFEVEK	1	1	1	Q99549	S8(Phospho)	0	S(8): 100.0	7.83333e+06	0	7.385e-09	60.96	1.51918e-05	2	2238.87	3.25289	26.7106	0
High	GLWSTDsAEEDKETK	1	1	1	Q99549	S7(Phospho)	0	S(4): 1.0; T(5): 1.0; S(7): 98.0; T(14): 0.0	3.23567e+06	0	0.0001338	35.41	0.00611447	2	1775.74	3.30976	14.4054	1
High	TSSKEssPIPsPTSDR	1	1	1	Q01082	S6(Phospho); S7(Phospho); S11(Phospho)	0	T(1): 40.0; S(2): 40.0; S(3): 40.0; S(6): 40.0; S(7): 40.0; S(11): 94.1; T(13): 2.9; S(14): 2.9	8.50219e+06	0.001	0.003925	17.6	0.238079	2	1915.71	0.347648	16.5279	1
High	TSSKEssPIPSPTSDR	1	1	1	Q01082	S6(Phospho); S7(Phospho)	0	T(1): 7.2; S(2): 7.2; S(3): 7.2; S(6): 89.2; S(7): 89.2; S(11): 0.0; T(13): 0.0; S(14): 0.0	4.00093e+06	0	0.001126	30.31	0.0184359	2	1835.75	-0.489455	13.9341	1
High	RPPsPEPSTK	2	1	1	Q01082	S4(Phospho)	0	S(4): 100.0; S(8): 0.0; T(9): 0.0	1.27864e+08	0	7.155e-05	46.47	0.000385475	2	1175.55	0.224352	5.89286	1
High	AQTLPTSVVTITSESsPGKR	5	1	1	Q01082	S16(Phospho)	0	T(3): 0.0; T(6): 0.0; S(7): 0.0; T(10): 0.0; T(12): 0.0; S(13): 0.0; S(15): 1.5; S(16): 98.5	4.77047e+07	0	1.254e-06	29.76	0.0260506	3	2139.07	1.53042	20.5864	1
High	GEQVSQNGLPAEQGsPR	1	1	1	Q01082	S15(Phospho)	0	S(5): 0.0; S(15): 100.0	4.06365e+06	0	4.097e-05	29.09	0.0310742	2	1833.82	1.46961	14.0499	0
High	mETMAsPGKDNYR	1	1	1	O60684	N-Term(Acetyl); M1(Oxidation); S6(Phospho)	0	T(3): 0.0; S(6): 100.0; Y(12): 0.0	4.46503e+06	0	8.008e-09	72.17	9.52576e-07	2	1637.64	2.07506	14.0557	1
High	mETmAsPGKDNYR	1	1	1	O60684	N-Term(Acetyl); M1(Oxidation); M4(Oxidation); S6(Phospho)	0	T(3): 0.0; S(6): 100.0; Y(12): 0.0	6.14744e+06	0	4.947e-05	31.93	0.00913724	2	1653.63	1.66052	11.0801	1
High	QVsASELHTSGILGPETLR	3	1	1	P58107	S3(Phospho)	0	S(3): 98.4; S(5): 1.6; T(9): 0.0; S(10): 0.0; T(17): 0.0	2.33788e+07	0	3.948e-09	53.42	0.000126259	3	2075.02	0.489725	23.2483	0
High	SVHIStPEKEPcAPLTIPSIR	1	1	1	P28290	T6(Phospho); C12(Carbamidomethyl)	0	S(1): 0.0; S(5): 50.0; T(6): 50.0; T(16): 0.0; S(19): 0.0	4.28339e+06	0	0.002538	14.62	0.821442	3	2412.2	1.4417	21.7055	1
High	SQsLPTTLLSPVR	1	1	1	P28290	S3(Phospho)	0	S(1): 0.0; S(3): 100.0; T(6): 0.0; T(7): 0.0; S(10): 0.0	5.30206e+06	0	3.287e-09	78.79	2.50386e-07	2	1478.76	1.50611	27.9578	0
High	GNsRPGtPSAEGGSTSSTLR	2	1	1	P35269	S3(Phospho); T7(Phospho)	0	S(3): 100.0; T(7): 100.0; S(9): 0.0; S(14): 0.0; T(15): 0.0; S(16): 0.0; S(17): 0.0; T(18): 0.0	1.40307e+07	0	3.43e-10	78.78	2.97977e-07	3	2078.85	-0.457353	12.0964	1
High	GNsRPGTPSAEGGSTSSTLR	1	1	1	P35269	S3(Phospho)	0	S(3): 98.4; T(7): 1.6; S(9): 0.0; S(14): 0.0; T(15): 0.0; S(16): 0.0; S(17): 0.0; T(18): 0.0	3.80866e+06	0	8.876e-05	12.84	1.54179	3	1998.89	0.787477	9.77017	1
High	APVQPQQsPAAAPGGTDEKPSGK	1	1	1	Q13200	S8(Phospho)	0	S(8): 100.0; T(16): 0.0; S(21): 0.0	3.02363e+07	0	3.09e-12	44.68	0.00117781	3	2298.08	1.12671	10.7982	1
High	DKAPVQPQQsPAAAPGGTDEKPSGK	1	1	1	Q13200	S10(Phospho)	0	S(10): 100.0; T(18): 0.0; S(23): 0.0	5.15175e+07	0	9.23e-12	54.32	0.000114462	3	2541.2	2.1829	10.2563	2
High	VGGsSVDLHR	1	1	1	O60716	S4(Phospho)	0	S(4): 100.0; S(5): 0.0	2.06691e+06	0	5.758e-08	78.12	3.16819e-07	2	1106.5	0.44918	9.79036	0
High	HYEDGYPGGsDNYGSLSR	2	1	1	O60716	S10(Phospho)	0	Y(2): 0.0; Y(6): 0.0; S(10): 33.2; Y(13): 33.2; S(15): 33.2; S(17): 0.5	4.60518e+06	0	0.001381	15.98	0.516052	2	2053.8	1.84433	15.3166	0
High	WLDEsDAEmELR	1	1	1	Q9P035	S5(Phospho); M9(Oxidation)	0	S(5): 100.0	30694134	0	1.782e-06	41.22	0.00114396	2	1589.62	0.798654	24.8444	0
High	WLDEsDAEMELR	1	1	1	Q9P035	S5(Phospho)	0	S(5): 100.0	6.51318e+07	0	1.837e-06	61.59	1.17189e-05	2	1573.62	-2.57977	26.9823	0
High	NSsSPVSPASVPGQR	2	1	1	Q9H1B7	S3(Phospho)	0	S(2): 1.6; S(3): 96.9; S(4): 1.6; S(7): 0.0; S(10): 0.0	3.63205e+06	0	0.0002613	26.64	0.0533255	2	1549.7	0.812799	14.4089	0
High	KAsPEPPDSAEGALK	1	1	1	Q9H1B7	S3(Phospho)	0	S(3): 100.0; S(9): 0.0	1.73862e+07	0	5.506e-10	76.09	5.41281e-07	2	1576.72	-0.477735	11.8588	1
High	VDsTTcLFPVEEK	2	1	1	Q06210	S3(Phospho); C6(Carbamidomethyl)	0	S(3): 99.3; T(4): 0.7; T(5): 0.0	9.13993e+07	0	2.761e-07	70.11	2.30585e-06	2	1604.69	0.0870068	25.7977	0
High	NQAsDsENEELPKPR	1	1	1	Q96ST2	S4(Phospho); S6(Phospho)	0	S(4): 100.0; S(6): 100.0	1.67826e+07	0	0.002768	12.65	1.13268	2	1873.74	1.84899	13.6743	1
High	HQAsDsENEELPKPR	1	1	1	Q96ST2	S4(Phospho); S6(Phospho)	0	S(4): 100.0; S(6): 100.0	1.11699e+07	0.001	0.008496	10.04	1.80827	3	1896.75	-0.105344	10.8514	1
High	MNsTGGQTPR	1	1	1	Q96ST2	S3(Phospho)	0	S(3): 100.0; T(4): 0.0; T(8): 0.0	7.54181e+06	0	0.0001952	54.9	3.94784e-05	2	1128.45	1.15685	6.37993	0
High	mNsTGGQTPR	2	1	1	Q96ST2	M1(Oxidation); S3(Phospho)	0	S(3): 100.0; T(4): 0.0; T(8): 0.0	4.19914e+06	0	0.000103	45.76	0.000257497	2	1144.45	1.74401	5.07941	0
High	EPsAPSIPTPAYQSSPAGGHAPTPPTPAPR	1	1	1	Q8WUM4	S3(Phospho)	0	S(3): 99.9; S(6): 0.1; T(9): 0.0; Y(12): 0.0; S(14): 0.0; S(15): 0.0; T(23): 0.0; T(26): 0.0	7.98827e+06	0.001	0.008396	12.75	1.73865	3	3016.42	-0.253807	22.0941	0
High	DKYEPAAVsEQGDKK	1	1	1	P05023	S9(Phospho)	0	Y(3): 0.0; S(9): 100.0	5.22288e+06	0	2.027e-05	43.45	0.00119968	3	1744.78	0.952269	7.97036	2
High	RQSSGsATNVASTPDNR	2	1	1	Q7Z460	S6(Phospho)	0	S(3): 49.6; S(4): 49.6; S(6): 0.7; T(8): 0.0; S(12): 0.0; T(13): 0.0	1.09686e+07	0	1.869e-06	25.86	0.0748421	3	1827.8	0.772732	7.30052	1
High	SRsDIDVNAAASAK	1	1	1	Q7Z460	S3(Phospho)	0	S(1): 0.0; S(3): 100.0; S(12): 0.0	2.15514e+07	0	6.571e-08	51.51	0.00014091	2	1484.68	1.787	10.6666	1
High	TGscSELDAcPSK	2	1	1	Q9H1H9	S3(Phospho); C4(Carbamidomethyl); C10(Carbamidomethyl)	0	T(1): 0.0; S(3): 100.0; S(5): 0.0; S(12): 0.0	4.82538e+06	0	4.56e-09	76.47	2.26551e-07	2	1491.55	0.355279	12.3375	0
High	NAEAVLQsPGLSGK	1	1	1	Q13045	S8(Phospho)	0	S(8): 99.3; S(12): 0.7	1.00152e+07	0	1.929e-08	76.43	4.7322e-07	2	1450.69	0.723458	18.5794	0
High	ALsPVIPLIPR	1	1	1	O14686	S3(Phospho)	0	S(3): 100.0	8.7013e+06	0	0.0003947	27.08	0.0161605	2	1255.72	0.00201105	33.5614	0
High	LsPLPVVSR	1	1	1	O14686	S2(Phospho)	0	S(2): 100.0; S(8): 0.0	2.18136e+06	0.001	0.01529	19.77	0.182409	2	1047.56	-0.592424	22.9723	0
High	VsPAAAQLADTLFSK	1	1	1	O14686	S2(Phospho)	0	S(2): 100.0; T(11): 0.0; S(14): 0.0	7.17076e+06	0	2.059e-08	73.74	1.10528e-06	2	1598.78	0.838666	30.9171	0
High	AMLDQLMGTsR	1	1	1	Q9Y383	S10(Phospho)	0	T(9): 0.6; S(10): 99.4	6.27798e+06	0	3.818e-07	61.05	1.27993e-05	2	1302.56	-0.458723	26.2412	0
High	AMLDQLmGtSR	2	1	1	Q9Y383	M7(Oxidation); T9(Phospho)	0	T(9): 50.0; S(10): 50.0	2.4517e+06	0.001	0.003473	35.74	0.00417363	2	1318.55	-1.41077	20.1056	0
High	LLPEGEETLEsDDEKDEHTSK	4	1	1	Q8N6N3	S11(Phospho)	0	T(8): 0.0; S(11): 100.0; T(19): 0.0; S(20): 0.0	1.7562e+08	0	1.287e-07	46.26	0.000718057	3	2481.06	1.81628	13.7199	1
High	SGsGISVISSTSVDQR	1	1	1	Q15811	S3(Phospho)	0	S(1): 0.7; S(3): 99.3; S(6): 0.0; S(9): 0.0; S(10): 0.0; T(11): 0.0; S(12): 0.0	11839903	0	2.342e-10	75.87	6.48347e-07	2	1659.76	-0.962004	21.0629	0
High	AAsPPASASDLIEQQQK	1	1	1	Q5VSL9	S3(Phospho)	0	S(3): 100.0; S(7): 0.0; S(9): 0.0	2.47718e+07	0	1.996e-10	75.57	9.35996e-07	2	1820.85	2.89189	20.344	0
High	tPKDSPGIPPSAGAHQLFR	2	1	1	Q15418	T1(Phospho)	0	T(1): 50.0; S(5): 50.0; S(11): 0.0	1.23113e+07	0	0.0001305	13.75	1.20394	3	2056	1.0354	16.2319	1
High	AYsFcGTVEYmAPEVVNR	1	3	1	Q15418	S3(Phospho); C5(Carbamidomethyl); M11(Oxidation)	0	Y(2): 50.0; S(3): 50.0; T(7): 0.0; Y(10): 0.0	4.40284e+06	0	0.000192	39.86	0.00263354	2	2188.9	-2.67444	26.4736	0
High	AYsFcGTVEYMAPEVVNR	1	3	1	Q15418	S3(Phospho); C5(Carbamidomethyl)	0	Y(2): 50.0; S(3): 50.0; T(7): 0.0; Y(10): 0.0	8.49546e+06	0	1.472e-06	57.84	4.49736e-05	2	2172.91	0.471164	30.3141	0
High	IEVLDsPASK	1	1	1	Q8N5I9	S6(Phospho)	0	S(6): 100.0; S(9): 0.0	3.22695e+06	0	2.177e-06	55.92	7.99558e-05	2	1138.54	-0.295415	16.6984	0
High	ASPScSsPTR	2	1	1	Q8N5I9	C5(Carbamidomethyl); S7(Phospho)	0	S(2): 0.0; S(4): 0.0; S(6): 0.0; S(7): 100.0; T(9): 0.0	6.04946e+06	0	6.913e-05	45.42	0.000401909	2	1129.44	0.727764	5.83237	0
High	DAQRLsPIPEEVPK	1	1	1	Q96T23	S6(Phospho)	0	S(6): 100.0	4.17986e+06	0	0.000556	20.4	0.224355	3	1658.82	0.0146452	19.4855	1
High	EESYsPSKDR	1	1	1	Q96T23	S5(Phospho)	0	S(3): 0.0; Y(4): 0.0; S(5): 99.3; S(7): 0.7	4.17773e+06	0.001	0.01033	31.58	0.0085488	2	1277.51	2.17573	6.20621	1
High	IEsDEEEDFENVGK	1	1	1	Q96T23	S3(Phospho)	0	S(3): 100.0	5.22535e+06	0	1.827e-08	56.52	3.32037e-05	2	1719.67	2.12686	20.0734	0
High	STLESEKPGsPEAAETSPPSNIIDHcEK	4	1	1	Q96T23	S10(Phospho); C26(Carbamidomethyl)	0	S(1): 0.0; T(2): 0.0; S(5): 1.7; S(10): 98.2; T(16): 0.0; S(17): 0.0; S(20): 0.0	1.86011e+07	0	4.038e-06	28.59	0.0569338	3	3090.37	2.72254	16.6039	1
High	AKEVELVsE	1	1	1	O60832	S8(Phospho)	0	S(8): 100.0	3.48332e+06	0.001	0.003669	46.01	0.000379676	2	1083.5	-0.907268	15.5078	1
High	KREsEsESDETPPAAPQLIK	1	1	1	O60832	S4(Phospho); S6(Phospho)	0	S(4): 99.9; S(6): 33.4; S(8): 33.4; T(11): 33.4	5.00507e+07	0.001	0.01185	10.15	3.53092	3	2372.05	2.39804	17.426	2
High	AGLESGAEPGDGDsDTTK	1	1	1	O60832	S14(Phospho)	0	S(5): 0.0; S(14): 33.3; T(16): 33.3; T(17): 33.3	23091153	0	2.344e-08	52.47	9.08814e-05	2	1786.7	0.485742	12.9455	0
High	AGLESGAEPGDGDsDTTKK	1	1	1	O60832	S14(Phospho)	0	S(5): 0.0; S(14): 97.1; T(16): 1.5; T(17): 1.5	9.89228e+06	0	0.0001522	18.03	0.385626	2	1914.8	1.53738	9.33191	1
High	ELDEEGsDPPLPGR	1	1	1	Q9BRJ6	S7(Phospho)	0	S(7): 100.0	2.58184e+07	0	4.777e-07	57.28	3.16145e-05	2	1590.67	0.902201	19.7928	0
High	GEAVLRPGLDAEPELsPEEQR	1	1	1	Q9BRJ6	S16(Phospho)	0	S(16): 100.0	4.71969e+06	0	9.152e-06	38.42	0.00504299	3	2372.13	6.14063	21.5559	1
High	LDsPTMSR	1	1	1	P19634	S3(Phospho)	0	S(3): 100.0; T(5): 0.0; S(7): 0.0	2.91756e+06	0.001	0.008123	32.66	0.00493221	2	986.401	-0.215622	10.6479	0
High	IGsDPLAYEPK	1	1	1	P19634	S3(Phospho)	0	S(3): 100.0; Y(8): 0.0	6.57681e+06	0	2.613e-08	65.92	4.61825e-06	2	1269.58	1.36914	22.1414	0
High	AGEPDGEsLDEQPSSSSSK	1	1	1	Q9H3Q1	S8(Phospho)	0	S(8): 100.0; S(14): 0.0; S(15): 0.0; S(16): 0.0; S(17): 0.0; S(18): 0.0	6.74546e+06	0	2.363e-10	74.48	6.93297e-07	2	1986.78	1.6102	12.7677	0
High	AGPDLPSLPSHALEDEGWAAAAPsPGSAR	1	1	1	Q9H3Q1	S24(Phospho)	0	S(7): 0.0; S(10): 0.0; S(24): 100.0; S(27): 0.0	2.03603e+07	0	5.294e-08	22.55	0.208186	3	2907.33	1.06224	27.9089	0
High	DGDSYDPyDFSDTEEEMPQVHtPK	1	1	1	P25205	Y8(Phospho); T22(Phospho)	0	S(4): 0.0; Y(5): 0.0; Y(8): 1.0; S(11): 49.5; T(13): 49.5; T(22): 100.0	5.79501e+07	0	2.79e-06	29.09	0.0202229	3	2962.08	2.74236	29.1195	0
High	DGDSYDPyDFSDTEEEmPQVHTPK	1	1	1	P25205	Y8(Phospho); M17(Oxidation)	0	S(4): 0.0; Y(5): 0.0; Y(8): 0.0; S(11): 98.2; T(13): 1.8; T(22): 0.0	4.14871e+07	0	3.614e-06	23.92	0.0981331	3	2898.1	1.42723	23.1103	0
High	DGDSYDPYDFsDTEEEMPQVHTPK	2	1	1	P25205	S11(Phospho)	0.0465	S(4): 0.0; Y(5): 0.0; Y(8): 0.0; S(11): 98.6; T(13): 1.4; T(22): 0.0	5.75283e+07	0	2.906e-09	41.49	0.00174201	3	2882.12	5.3463	26.134	0
High	EHYPVSsPSsPSPPAQPGGVSR	6	1	1	O75179	S7(Phospho); S10(Phospho)	0	Y(3): 0.1; S(6): 1.8; S(7): 49.7; S(9): 49.1; S(10): 49.7; S(12): 49.7; S(21): 0.0	4.70257e+06	0	2.698e-05	20.57	0.252138	3	2380	-0.729725	18.2345	0
High	EHYPVSsPSSPSPPAQPGGVSR	6	1	1	O75179	S7(Phospho)	0	Y(3): 1.1; S(6): 48.9; S(7): 48.9; S(9): 1.1; S(10): 0.0; S(12): 0.0; S(21): 0.0	5.63962e+06	0	0.0001468	17.43	0.568356	3	2300.04	1.53679	15.4572	0
High	LTVAsPK	1	1	1	O75179	S5(Phospho)	0	T(2): 0.0; S(5): 100.0	2.50247e+06	0.001	0.003733	37.78	0.00204238	2	795.401	0.306162	10.629	0
High	NSPLDcGSAsPNK	1	1	1	O75179	C6(Carbamidomethyl); S10(Phospho)	0	S(2): 0.0; S(8): 0.0; S(10): 100.0	7.62153e+06	0	8.397e-07	60	1.255e-05	2	1426.57	0.374403	11.9021	0
High	GGLsPANDTGAK	1	1	1	P30419	S4(Phospho)	0	S(4): 100.0; T(9): 0.0	4.60636e+07	0	3.599e-07	73.98	5.7992e-07	2	1167.5	0.606517	10.2465	0
High	LTTTGQVtSPVK	1	1	1	P49916	T8(Phospho)	0	T(2): 0.0; T(3): 0.0; T(4): 0.0; T(8): 0.0; S(9): 100.0	2.12254e+07	0	1.196e-07	60.8	1.78829e-05	2	1311.66	0.514844	13.5581	0
High	PNNSGEAPSsPTPK	2	1	1	P49916	S10(Phospho)	0	S(4): 0.0; S(9): 0.5; S(10): 49.8; T(12): 49.8	3.7624e+06	0	3.839e-07	39.24	0.00247778	2	1462.62	1.9873	7.9551	0
High	ADYDTLsLR	1	1	1	Q9Y446	S7(Phospho)	0	Y(3): 0.0; T(5): 0.0; S(7): 100.0	2.23985e+06	0	0.0001209	53.66	7.29743e-05	2	1133.49	0.208381	20.7643	0
High	LSsGFDDIDLPSAVK	2	1	1	Q9Y446	S3(Phospho)	0	S(2): 0.0; S(3): 100.0; S(12): 0.0	1.7101e+07	0	5.45e-08	46.3	0.000707957	2	1643.76	0.312276	29.0634	0
High	RtPTAPDNTDVR	1	1	1	Q9Y6N8	T2(Phospho)	0	T(2): 100.0; T(4): 0.0; T(9): 0.0	1.31562e+06	0.001	0.005541	18.67	0.250609	2	1422.64	1.2114	8.09239	1
High	LAEMYGGGEsDKDS	1	1	1	Q9Y6N8	S10(Phospho)	0	Y(5): 0.0; S(10): 100.0; S(14): 0.0	8.6751e+06	0	2.369e-07	69.21	1.38542e-06	2	1538.57	0.384073	15.031	1
High	LAEmYGGGEsDKDS	1	1	1	Q9Y6N8	M4(Oxidation); S10(Phospho)	0	Y(5): 0.0; S(10): 98.9; S(14): 1.1	5.18385e+06	0	0.002125	24.34	0.0357085	2	1554.57	0.824276	11.3268	1
High	VNFSEEGEtEEDDQDSSHSSVTTVK	2	1	1	Q5JTV8	T9(Phospho)	0	S(4): 0.0; T(9): 100.0; S(16): 0.0; S(17): 0.0; S(19): 0.0; S(20): 0.0; T(22): 0.0; T(23): 0.0	1.91365e+07	0	1.429e-10	47.68	0.000464907	3	2836.13	-1.8738	15.2783	0
High	LQQQHSEQPPLQPsPVmTR	1	1	1	Q5JTV8	S14(Phospho); M17(Oxidation)	0	S(6): 0.0; S(14): 100.0; T(18): 0.0	1.14383e+07	0	9.999e-07	25.69	0.0876765	3	2297.08	1.38157	13.9139	0
High	LQQQHSEQPPLQPsPVMTR	1	1	1	Q5JTV8	S14(Phospho)	0	S(6): 0.0; S(14): 100.0; T(18): 0.0	2.12566e+07	0	4.654e-10	37.75	0.00552327	3	2281.08	0.47315	16.3109	0
High	TVsDNSLSNSR	1	1	1	Q96RU3	S3(Phospho)	0	T(1): 0.0; S(3): 100.0; S(6): 0.0; S(8): 0.0; S(10): 0.0	4.53237e+06	0	9.926e-08	73.31	6.92989e-07	2	1259.53	-1.04824	9.57904	0
High	HAPsPEPAVQGTGVAGVPEESGDAAAIPAK	1	1	1	P13051	S4(Phospho)	0	S(4): 100.0; T(12): 0.0; S(21): 0.0	3.5175e+07	0	4.737e-14	66.32	8.14377e-06	3	2890.37	2.05226	20.6048	0
High	KAPAGQEEPGTPPssPLSAEQLDR	1	1	1	P13051	S14(Phospho); S15(Phospho)	0	T(11): 100.0; S(14): 50.0; S(15): 50.0; S(18): 0.0	9.7091e+06	0	6.155e-05	26.39	0.0816281	3	2622.15	1.7108	20.5639	1
High	TGSGsPFAGNsPAR	3	1	1	Q9UPT8	S5(Phospho); S11(Phospho)	0	T(1): 0.0; S(3): 0.0; S(5): 100.0; S(11): 100.0	5.76103e+06	0	4.413e-05	36.5	0.00218275	2	1465.55	0.261901	16.2284	0
High	TGSGSPFAGNsPAR	1	1	1	Q9UPT8	S11(Phospho)	0	T(1): 0.0; S(3): 0.0; S(5): 0.0; S(11): 100.0	4.98153e+06	0	0.0001637	30.66	0.0140878	2	1385.59	1.96709	13.0519	0
High	VNQSALEAVTPsPSFQQR	2	1	1	Q9UKG1	S12(Phospho)	0	S(4): 0.0; T(10): 0.0; S(12): 99.2; S(14): 0.8	1.03174e+07	0	2.964e-09	72.96	1.38596e-06	2	2038.96	2.13364	23.0955	0
High	EAGsPAQEFK	1	1	1	Q5JSZ5	S4(Phospho)	0	S(4): 100.0	2.17247e+06	0	0.001405	27.69	0.0218727	2	1143.47	0.317688	12.5529	0
High	LKFsDDEEEEEVVK	1	1	1	Q5JSZ5	S4(Phospho)	0	S(4): 100.0	1.50104e+07	0	3.237e-11	70.46	2.11382e-06	2	1775.77	2.9584	17.5015	1
High	LGASNsPGQPNSVK	1	1	1	P49756	S6(Phospho)	0	S(4): 0.0; S(6): 100.0; S(12): 0.0	5.3256e+07	0	6.539e-10	72.68	1.24087e-06	2	1435.66	2.46589	10.1806	0
High	ATsSSSGSLSATGR	3	1	1	Q03252	S3(Phospho)	0	T(2): 1.3; S(3): 97.4; S(4): 1.3; S(5): 0.0; S(6): 0.0; S(8): 0.0; S(10): 0.0; T(12): 0.0	1.63261e+06	0	1.368e-06	42.7	0.00103379	2	1348.57	-0.49715	8.72255	0
High	SVSEINsDDELSGK	1	1	1	P82094	S7(Phospho)	0	S(1): 0.0; S(3): 0.0; S(7): 100.0; S(12): 0.0	9.96721e+06	0	2.309e-11	72.35	1.06525e-06	2	1559.65	0.197677	15.7549	0
High	TSPSsPAPLPHQEATPR	4	1	1	P04920	S5(Phospho)	0.0435	T(1): 0.0; S(2): 0.0; S(4): 1.2; S(5): 98.8; T(15): 0.0	4.82228e+06	0	4.916e-07	21.74	0.183548	3	1852.86	1.01556	13.0971	0
High	RRPGASPTGETPTIEEGEEDEDEAsEAEGAR	1	1	1	P04920	S25(Phospho)	0	S(6): 0.0; T(8): 0.0; T(11): 0.1; T(13): 0.1; S(25): 99.9	1.54005e+07	0	0.0003114	10.72	3.06273	3	3352.41	1.45419	14.1809	2
High	ERDHsPTPSVFNSDEER	1	1	1	Q6UN15	S5(Phospho)	0	S(5): 100.0; T(7): 0.0; S(9): 0.0; S(13): 0.0	2.18672e+07	0	2.677e-07	40.63	0.00227919	3	2081.86	0.239803	12.1918	1
High	AEsPDLR	1	1	1	Q6UN15	S3(Phospho)	0	S(3): 100.0	3.63982e+06	0.001	0.003572	50.95	3.93728e-05	2	867.361	0.063575	8.979	0
High	SGsmDPSGAHPSVR	4	1	1	Q07666	S3(Phospho); M4(Oxidation)	0	S(1): 0.8; S(3): 99.2; S(7): 0.0; S(12): 0.0	2.07609e+07	0	7.093e-07	40.27	0.00143308	2	1480.59	1.95397	7.24338	0
High	SGsMDPSGAHPSVR	4	1	1	Q07666	S3(Phospho)	0	S(1): 0.0; S(3): 100.0; S(7): 0.0; S(12): 0.0	2.91881e+07	0	2.048e-07	51.83	0.00012598	2	1464.6	1.92061	9.61171	0
High	AGGSAALsPSK	1	1	1	Q92522	S8(Phospho)	0	S(4): 0.0; S(8): 100.0; S(10): 0.0	5.84231e+07	0	3.923e-08	69.78	1.54638e-06	2	1025.47	0.103331	8.10601	0
High	AGGSAALsPSKK	1	1	1	Q92522	S8(Phospho)	0	S(4): 0.0; S(8): 98.7; S(10): 1.3	1.45996e+07	0	0.001014	27.73	0.0365982	2	1153.56	0.409928	5.74331	1
High	TcEERPAEDGsDEEDPDSmEAPTR	1	1	1	Q9H6Y2	C2(Carbamidomethyl); S11(Phospho); M19(Oxidation)	0	T(1): 0.0; S(11): 100.0; S(18): 0.0; T(23): 0.0	7.66009e+06	0	2.813e-07	15.14	0.450109	3	2819.04	2.53663	11.4257	1
High	TcEERPAEDGsDEEDPDSMEAPTR	1	1	1	Q9H6Y2	C2(Carbamidomethyl); S11(Phospho)	0	T(1): 0.0; S(11): 100.0; S(18): 0.0; T(23): 0.0	2.13155e+07	0	5.019e-13	76.31	4.10466e-07	3	2803.04	1.47734	13.7051	1
High	LFDDEAsVDEPR	1	1	1	Q8NI35	S7(Phospho)	0	S(7): 100.0	3.52844e+06	0	1.868e-08	71.57	9.71794e-07	2	1472.6	0.98897	20.699	0
High	AGGAsPAASSTAQPPTQHR	2	1	1	Q8IU81	S5(Phospho)	0	S(5): 100.0; S(9): 0.0; S(10): 0.0; T(11): 0.0; T(16): 0.0	6.58963e+06	0	1.498e-11	72.43	1.73158e-06	2	1871.84	2.27443	8.15834	0
High	KAsPEPEGEAAGK	1	1	1	Q8IU81	S3(Phospho)	0	S(3): 100.0	2.1186e+06	0.001	0.0045	19.9	0.186751	2	1350.6	1.7286	5.75134	1
High	TLsSSAQEDIIR	1	1	1	Q9H788	S3(Phospho)	0	T(1): 0.0; S(3): 100.0; S(4): 0.0; S(5): 0.0	3.87382e+07	0	1.869e-06	71.35	1.5426e-06	2	1399.65	0.617417	19.714	0
High	ASGGAQsPLR	1	1	1	Q6NXT1	S7(Phospho)	0	S(2): 0.0; S(7): 100.0	7.57934e+06	0	9.988e-08	71.05	8.99095e-07	2	1023.46	1.44041	7.5057	0
High	sSFSHYSGLK	2	1	1	Q8NC51	S1(Phospho)	0	S(1): 50.0; S(2): 50.0; S(4): 0.0; Y(6): 0.0; S(7): 0.0	1.52289e+07	0	0.0002262	49.29	0.000226689	2	1192.5	-0.398333	12.2062	0
High	KELsEEsEDEELQLEEFPMLK	1	1	1	Q99543	S4(Phospho); S7(Phospho)	0	S(4): 100.0; S(7): 100.0	3.83469e+06	0.001	0.006483	18.52	0.445717	3	2712.13	0.298101	33.5116	1
High	NAsASFQELEDK	1	1	1	Q99543	S3(Phospho)	0	S(3): 100.0; S(5): 0.0	4.50323e+06	0	1.565e-07	72.37	8.63349e-07	2	1418.59	1.85885	18.9714	0
High	PGPTPSGTNVGSSGRsPSK	2	1	1	P60468	S16(Phospho)	0	T(4): 0.0; S(6): 0.0; T(8): 0.0; S(12): 0.0; S(13): 0.0; S(16): 100.0; S(18): 0.0	6.45293e+07	0	4.816e-06	46.75	0.000581209	2	1849.85	4.79529	7.97928	1
High	VDSPsHGLVTSSLcIPSPAR	5	1	1	Q9UER7	S5(Phospho); C14(Carbamidomethyl)	0	S(3): 20.0; S(5): 20.0; T(10): 20.0; S(11): 20.0; S(12): 20.0; S(17): 0.0	6.46555e+06	0.001	0.007789	12.6	1.73105	3	2160.02	0.909688	24.1967	0
High	DGDKsPMSSLQISNEK	1	1	1	Q9UER7	S5(Phospho)	0	S(5): 100.0; S(8): 0.0; S(9): 0.0; S(13): 0.0	9.65346e+06	0	1.786e-11	70.95	2.01685e-06	2	1815.79	1.54973	17.8456	1
High	ELSKEDLSPAFDHsPNK	1	1	1	P17706	S14(Phospho)	0	S(3): 0.0; S(8): 0.0; S(14): 100.0	5.82499e+06	0	5.257e-05	20.65	0.229885	3	1993.89	0.363158	14.9155	1
High	EDLSPAFDHsPNK	1	1	1	P17706	S10(Phospho)	0	S(4): 0.0; S(10): 100.0	6.82902e+06	0	7.242e-10	72.45	9.8696e-07	2	1536.64	1.23979	14.4845	0
High	VVLGDGVQLPPGDySTTPGGTLFsTTPGGTR	2	1	1	Q13541	Y14(Phospho); S24(Phospho)	0	Y(14): 20.0; S(15): 20.0; T(16): 20.0; T(17): 20.0; T(21): 20.0; S(24): 3.8; T(25): 3.8; T(26): 92.4; T(30): 0.2	2.03915e+07	0	4.759e-05	11.91	2.73772	3	3207.47	1.67255	39.2142	0
High	TPPRDLPtIPGVTSPSSDEPPMEASQSHLR	2	1	1	Q13541	T8(Phospho)	0	T(1): 50.0; T(8): 50.0; T(13): 0.0; S(14): 0.0; S(16): 0.0; S(17): 0.0; S(25): 0.0; S(27): 0.0	9.71149e+07	0	1.773e-10	37.84	0.00619106	3	3279.54	0.468375	23.7749	1
High	tPPRDLPTIPGVTSPSSDEPPmEASQSHLR	3	1	1	Q13541	T1(Phospho); M22(Oxidation)	0	T(1): 100.0; T(8): 0.0; T(13): 0.0; S(14): 0.0; S(16): 0.0; S(17): 0.0; S(25): 0.0; S(27): 0.0	4.6979e+07	0	1.241e-09	32.22	0.0239317	3	3295.54	1.49052	22.0623	1
High	NsPVTKtPPR	1	1	1	Q13541	S2(Phospho); T7(Phospho)	0	S(2): 100.0; T(5): 0.9; T(7): 99.1	36941485	0.001	0.01019	34.57	0.00656384	2	1256.54	0.666823	8.275	1
High	DLPTIPGVTsPSSDEPPMEASQSHLR	4	1	1	Q13541	S10(Phospho)	0	T(4): 91.9; T(9): 2.0; S(10): 2.0; S(12): 2.0; S(13): 2.0; S(21): 0.0; S(23): 0.0	1.64037e+07	0	1.654e-05	18.13	0.602957	3	2828.29	3.02713	27.6972	0
High	VDEDsAEDTQSNDGKEVVEVGQK	1	1	1	Q9H2G2	S5(Phospho)	0	S(5): 0.0; T(9): 50.0; S(11): 50.0	1.03801e+07	0	3.085e-05	16.23	0.793312	3	2558.08	1.49209	14.054	1
High	DSGsISLQETR	1	1	1	Q9H2G2	S4(Phospho)	0	S(2): 0.0; S(4): 100.0; S(6): 0.0; T(10): 0.0	2.96284e+06	0	2.393e-06	74.61	5.81178e-07	2	1272.55	-0.00139214	16.1685	0
High	ATIsDEEIER	1	1	1	Q9UQN3	S4(Phospho)	0	T(2): 0.0; S(4): 100.0	7.21838e+06	0	3.354e-07	70.64	1.37214e-06	2	1242.53	0.834007	14.782	0
High	VEQATKPsFER	1	1	1	Q96E39	S8(Phospho)	0	T(5): 0.0; S(8): 100.0	5.21479e+06	0	0.0006904	37	0.00410026	2	1371.63	1.46656	9.42333	1
High	DYGHsSSRDDYPSR	1	2	2	P38159;Q96E39	S5(Phospho)	0	Y(2): 0.0; S(5): 100.0; S(6): 0.0; S(7): 0.0; Y(11): 0.0; S(13): 0.0	6.99705e+06	0	0.0005155	17.46	0.236905	3	1721.66	1.28393	7.12202	1
High	GRDsYGGPPR	1	2	2	P38159;Q96E39	S4(Phospho)	0	S(4): 100.0; Y(5): 0.0	5.57236e+06	0	5.695e-06	59.08	1.94662e-05	2	1141.48	0.554846	6.54362	1
High	sPGASNFSTLPK	1	1	1	Q9Y4E8	S1(Phospho)	0	S(1): 100.0; S(5): 0.0; S(8): 0.0; T(9): 0.0	6.87278e+06	0	3.064e-08	70.42	1.85649e-06	2	1285.58	0.746215	18.4279	0
High	KGsFSALVGR	1	1	1	Q13619	S3(Phospho)	0	S(3): 100.0; S(5): 0.0	1.68923e+07	0	1.712e-06	70.42	1.37535e-06	2	1101.55	-0.071432	14.8687	1
High	AGGPTTPLsPTR	2	1	1	P20700	S9(Phospho)	0	T(5): 0.0; T(6): 0.0; S(9): 99.0; T(11): 1.0	1.26969e+07	0	0.0004356	36.95	0.00421839	2	1234.58	0.798272	14.5793	0
High	aTAtPVPPR	1	1	1	P20700	N-Term(Acetyl); T4(Phospho)	0	T(2): 0.0; T(4): 100.0	5.53025e+06	0.004	0.05197	28.96	0.0213456	2	1031.49	-3.50398	18.8462	0
High	KLsGDQITLPTTVDYSSVPK	2	1	1	O00559	S3(Phospho)	0	S(3): 100.0; T(8): 0.0; T(11): 0.0; T(12): 0.0; Y(15): 0.0; S(16): 0.0; S(17): 0.0	2.40203e+07	0	1.202e-13	60.81	2.27379e-05	2	2229.11	0.0762226	24.7082	1
High	MSPNETLFLEsTNK	1	2	1	Q9HB90	S11(Phospho)	0	S(2): 0.0; T(6): 0.0; S(11): 0.9; T(12): 99.1	1.68387e+07	0	7.587e-05	35.76	0.00645069	2	1690.74	1.14051	24.6573	0
High	mSPNETLFLEsTNK	1	2	1	Q9HB90	M1(Oxidation); S11(Phospho)	0	S(2): 0.0; T(6): 0.0; S(11): 50.0; T(12): 50.0	1.01474e+07	0	1.269e-07	59.05	2.61348e-05	2	1706.74	1.74894	22.684	0
High	LGsYSGPTSVSR	1	1	1	Q9BZ23	S3(Phospho)	0	S(3): 100.0; Y(4): 0.0; S(5): 0.0; T(8): 0.0; S(9): 0.0; S(11): 0.0	4.05242e+07	0	8.19e-09	69.46	2.14024e-06	2	1290.57	-0.988429	15.6376	0
High	AsSASVPAVGASAEGTR	2	1	1	Q9BZ23	S2(Phospho)	0	S(2): 50.0; S(3): 50.0; S(5): 0.0; S(12): 0.0; T(16): 0.0	4.02051e+06	0	2.51e-05	25.87	0.0560348	2	1597.72	0.768443	15.4284	0
High	DYDEEEQGYDsEKEKK	1	1	1	Q05519	S11(Phospho)	0	Y(2): 0.0; Y(9): 1.1; S(11): 98.9	4.87453e+06	0.001	0.006161	18.54	0.231632	3	2071.8	1.27527	7.77797	2
High	LNHVAAGLVsPSLK	2	1	1	Q05519	S10(Phospho)	0	S(10): 100.0; S(12): 0.0	1.17082e+07	0	1.253e-06	49.73	0.000184629	2	1485.78	0.867404	18.2668	0
High	RPILQLsPPGPR	1	1	1	Q8N3X1	S7(Phospho)	0	S(7): 100.0	8.90708e+06	0	0.0001751	45.9	0.000349574	3	1410.76	-1.29713	20.2505	1
High	ALEEGDGSVSGsSPR	2	1	1	Q8N3X1	S12(Phospho)	0	S(8): 0.0; S(10): 0.0; S(12): 50.0; S(13): 50.0	6.38078e+06	0	7.524e-08	48.33	0.000248983	2	1527.63	1.37121	11.808	0
High	AEEKsPISINVK	1	1	1	Q9UK58	S5(Phospho)	0	S(5): 100.0; S(8): 0.0	1.73864e+07	0	1.395e-06	69.27	2.78606e-06	2	1394.69	0.994552	13.5357	1
High	SStPLPTISSSAENTR	3	2	2	P42166;P42167	T3(Phospho)	0.0175	S(1): 0.0; S(2): 0.0; T(3): 100.0; T(7): 0.0; S(9): 0.0; S(10): 0.0; S(11): 0.0; T(15): 0.0	1.75635e+08	0	6.164e-07	56.18	6.48265e-05	2	1727.79	1.42769	18.6999	0
High	GPPDFSSDEEREPtPVLGSGAAAAGR	4	2	2	P42166;P42167	T14(Phospho)	0	S(6): 0.0; S(7): 0.0; T(14): 100.0; S(19): 0.0	1.0887e+08	0	5.978e-13	21.71	0.259356	3	2650.18	0.769257	20.466	1
High	FQETEFLsPPR	1	1	1	P42166	S8(Phospho)	0	T(4): 0.0; S(8): 100.0	4.6023e+06	0	0.0001584	41.27	0.0015974	2	1430.64	1.92554	24.5632	0
High	GPPDFsSDEEREPtPVLGSGAAAAGR	2	2	2	P42166;P42167	S6(Phospho); T14(Phospho)	0	S(6): 50.7; S(7): 50.7; T(14): 98.6; S(19): 0.0	1.30224e+08	0	2.429e-06	15.59	0.95516	3	2730.15	1.23035	24.572	1
High	GPAGEAGAsPPVR	1	1	1	Q13425	S9(Phospho)	0	S(9): 100.0	4.9123e+07	0	4.417e-05	28.91	0.0275694	2	1245.56	-0.193416	12.3426	0
High	GPAGEAGAsPPVRR	1	1	1	Q13425	S9(Phospho)	0	S(9): 100.0	3.8745e+06	0.001	0.004919	11.09	1.66111	3	1401.66	-0.257676	8.7929	1
High	GLGPPsPPAPPR	1	1	1	Q13425	S6(Phospho)	0	S(6): 100.0	5.84978e+07	0	3.463e-05	27.94	0.0335851	2	1222.6	0.996617	19.6205	0
High	sPSLGSDLTFATR	2	1	1	Q13425	S1(Phospho)	0	S(1): 100.0; S(3): 0.0; S(6): 0.0; T(9): 0.0; T(12): 0.0	1.11899e+07	0	2.704e-08	64.73	7.33595e-06	2	1431.65	-1.67274	25.7003	0
High	IVNHWAsPELR	1	1	1	O15027	S7(Phospho)	0	S(7): 100.0	1.33509e+06	0.004	0.0547	19.41	0.277214	2	1401.68	5.83193	16.678	0
High	QIDsSPVGGETDETTVSQNYR	2	1	1	O15027	S4(Phospho)	0	S(4): 50.0; S(5): 50.0; T(11): 0.0; T(14): 0.0; T(15): 0.0; S(17): 0.0; Y(20): 0.0	8.40207e+06	0	4.174e-12	68.78	4.35046e-06	2	2363.01	1.61638	18.1745	0
High	LLPSAPQTLPDGPLAsPAR	1	1	1	O15027	S16(Phospho)	0	S(4): 0.0; T(8): 0.0; S(16): 100.0	8.3582e+06	0	6.219e-05	15.98	0.512267	2	1981.02	-0.0473706	27.4629	0
High	AQQELVPPQQQAsPPQLPK	1	1	1	O15027	S13(Phospho)	0	S(13): 100.0	3.528e+07	0	1.159e-06	14.54	0.996674	3	2164.08	0.520084	22.544	0
High	sFEVEEVETPNSTPPR	1	1	1	Q9UHD8	S1(Phospho)	0	S(1): 100.0; T(9): 0.0; S(12): 0.0; T(13): 0.0	9.70846e+06	0	2.639e-08	68.73	3.28221e-06	2	1897.82	0.433652	22.6295	0
High	DSAIPVESDtDDEGAPR	1	1	1	Q96D46	T10(Phospho)	0	S(2): 0.0; S(8): 0.0; T(10): 100.0	5.82727e+06	0	1.094e-08	68.71	2.65807e-06	2	1853.75	3.05594	20.0277	0
High	SLsSPTVTLSAPLEGAK	3	1	1	Q96PU5	S3(Phospho)	0	S(1): 0.0; S(3): 100.0; S(4): 0.0; T(6): 0.0; T(8): 0.0; S(10): 0.0	1.13414e+07	0	1.546e-08	68.69	3.08273e-06	2	1737.87	1.97293	27.0418	0
High	IDEPSTPyHSmmGDDEDAcSDTEATEAMAPDILAR	7	1	1	P41236	Y8(Phospho); M11(Oxidation); M12(Oxidation); C19(Carbamidomethyl)	0	S(5): 14.3; T(6): 14.3; Y(8): 14.3; S(10): 14.3; S(20): 14.3; T(22): 14.3; T(25): 14.3	8.74604e+06	0	4.265e-06	25.28	0.079754	3	3953.54	0.0559084	26.1317	0
High	IDEPSTPyHSMMGDDEDAcSDTEATEAMAPDILAR	6	1	1	P41236	Y8(Phospho); C19(Carbamidomethyl)	0	S(5): 16.7; T(6): 16.7; Y(8): 16.7; S(10): 16.7; S(20): 16.7; T(22): 16.7; T(25): 0.0	1.89497e+07	0	2.688e-09	63.26	1.49408e-05	3	3921.56	3.47071	29.0188	0
High	ASAPsPNAQVAcDHcLK	2	1	1	Q14258	S5(Phospho); C12(Carbamidomethyl); C15(Carbamidomethyl)	0	S(2): 99.0; S(5): 1.0	1.02921e+07	0	3.525e-09	49.6	0.000277957	3	1905.8	-0.328815	12.5273	0
High	NVALLSQLYHsPAR	1	1	1	Q15717	S11(Phospho)	0	S(6): 0.0; Y(9): 0.0; S(11): 100.0	9.88537e+06	0	3.474e-10	68.4	3.58469e-06	2	1648.82	1.69917	22.9586	0
High	EtVSEAPPLLFSDEEEKEAQLGVK	1	2	2	Q641Q2;Q9Y4E1	T2(Phospho)	0	T(2): 49.5; S(4): 1.0; S(12): 49.5	1.03602e+07	0.001	0.01008	11.57	2.34415	3	2725.3	3.97778	26.8102	1
High	TVLsLFDEEEDKmEDQNIIQAPQK	2	2	2	Q641Q2;Q9Y4E1	S4(Phospho); M13(Oxidation)	0	T(1): 50.0; S(4): 50.0	8.77669e+06	0.001	0.01111	15.42	1.17558	3	2916.33	1.59416	29.6119	1
High	AVAsPEATVSQTDENK	1	2	2	Q641Q2;Q9Y4E1	S4(Phospho)	0	S(4): 100.0; T(8): 0.0; S(10): 0.0; T(12): 0.0	4.90335e+06	0	5.346e-07	39.84	0.00249526	2	1726.75	0.65311	13.897	0
High	RTPsDDEEDNLFAPPK	2	2	2	Q641Q2;Q9Y4E1	S4(Phospho)	0	T(2): 50.0; S(4): 50.0	2.38092e+07	0	5.692e-05	33.69	0.0121642	2	1910.82	0.930917	19.0124	1
High	GLFsDEEDSEDLFSSQSASK	1	1	1	Q641Q2	S4(Phospho)	0	S(4): 100.0; S(9): 0.0; S(14): 0.0; S(15): 0.0; S(17): 0.0; S(19): 0.0	9.21774e+06	0	3.992e-05	37.16	0.00519235	2	2257.91	3.57922	30.5329	0
High	SPMFPALGEAsSDDDLFQSAKPK	2	2	2	Q641Q2;Q9Y4E1	S11(Phospho)	0	S(1): 0.0; S(11): 50.0; S(12): 50.0; S(19): 0.0	4.29921e+06	0	9.158e-05	10.25	3.37974	3	2518.12	-2.01121	28.7565	1
High	sRPtSFADELAAR	2	2	2	Q641Q2;Q9Y4E1	S1(Phospho); T4(Phospho)	0	S(1): 100.0; T(4): 50.0; S(5): 50.0	5.8956e+06	0.006	0.07168	12.63	1.07514	2	1580.65	1.09958	22.3426	1
High	EEATYGVWAERDsDDERPSFGGK	1	1	1	Q9UBB9	S13(Phospho)	0	T(4): 0.0; Y(5): 0.0; S(13): 100.0; S(19): 0.0	2.50452e+07	0	8.207e-09	35.16	0.00973802	3	2681.11	-0.775412	19.0141	2
High	GAAEEAELEDsDDEEKPVKQDDFPK	1	1	1	Q9UBB9	S11(Phospho)	0	S(11): 100.0	2.12886e+07	0	9.612e-10	49.89	0.000352311	3	2871.21	1.44601	16.0362	2
High	LDSsPVSSPR	1	1	1	O60293	S4(Phospho)	0	S(3): 0.0; S(4): 100.0; S(7): 0.0; S(8): 0.0	2.40415e+06	0	1.1e-06	58.25	2.29672e-05	2	1124.5	-0.0477418	11.6298	0
High	RIsTSDILSEK	1	1	1	O60293	S3(Phospho)	0	S(3): 49.8; T(4): 0.4; S(5): 49.8; S(9): 0.0	6.82984e+06	0	0.000428	35.37	0.00637433	2	1328.65	-0.362045	16.0301	1
High	TVSsPPtSPRPGSAATVSASTSNIIPPR	5	1	1	O76094	S4(Phospho); T7(Phospho)	0	T(1): 1.1; S(3): 49.4; S(4): 49.4; T(7): 2.1; S(8): 2.1; S(13): 93.5; T(16): 2.1; S(18): 0.1; S(20): 0.0; T(21): 0.0; S(22): 0.0	6.56093e+07	0	4.467e-10	67.96	5.61445e-06	3	2895.37	1.97847	23.4169	1
High	VQTtPSKPGGDR	3	1	1	Q12834	T4(Phospho)	0	T(3): 0.0; T(4): 100.0; S(6): 0.0	1.41863e+07	0	9.562e-05	45.48	0.000502572	2	1322.61	0.239573	6.02953	1
High	EAAGPAPsPMR	1	1	1	Q12834	S8(Phospho)	0	S(8): 100.0	2.79125e+06	0	6.552e-05	39.35	0.00205576	2	1163.49	1.62743	12.668	0
High	LAAAEETAVsPR	1	1	1	Q9BUH6	S10(Phospho)	0	T(7): 0.0; S(10): 100.0	1.50202e+07	0	5.272e-09	67.68	3.2245e-06	2	1294.61	1.21585	13.6094	0
High	SLLSHEFQDEtDtEEETLYSSK	1	1	1	O75976	T11(Phospho); T13(Phospho)	0	S(1): 0.0; S(4): 0.0; T(11): 100.0; T(13): 100.0; T(17): 0.0; Y(19): 0.0; S(20): 0.0; S(21): 0.0	1.24533e+07	0	4.052e-07	31.8	0.0172771	3	2748.09	0.118979	26.2568	0
High	SLLSHEFQDEtDTEEETLYSSK	1	1	1	O75976	T11(Phospho)	0	S(1): 0.0; S(4): 0.0; T(11): 98.8; T(13): 1.2; T(17): 0.0; Y(19): 0.0; S(20): 0.0; S(21): 0.0	1.25872e+07	0	2.327e-08	57.28	6.29485e-05	3	2668.12	0.0394402	23.1868	0
High	FGEYNSNMsPEEK	1	1	1	P78316	S9(Phospho)	0	Y(4): 0.0; S(6): 0.0; S(9): 100.0	6.36871e+06	0	0.0001619	57.06	1.95805e-05	2	1611.61	2.40942	15.8501	0
High	FGEYNSNmsPEEK	1	1	1	P78316	M8(Oxidation); S9(Phospho)	0	Y(4): 0.0; S(6): 0.0; S(9): 100.0	4.02939e+06	0	0.0001799	33.6	0.00467072	2	1627.6	-1.61505	12.7524	0
High	sVSSFPVPQDNVDTHPGSGK	2	1	1	Q676U5	S1(Phospho)	0	S(1): 100.0; S(3): 0.0; S(4): 0.0; T(14): 0.0; S(18): 0.0	9.05719e+06	0	1.407e-11	50.32	0.0003191	3	2134.95	2.39895	18.9321	0
High	SNtPILVDGK	1	1	1	P06744	T3(Phospho)	0	S(1): 0.0; T(3): 100.0	0	0	1.274e-05	67.36	3.70981e-06	2	1123.54	0.602054	16.9991	0
High	KVEEDLKADEPsSEEsDLEIDK	2	1	1	P50502	S12(Phospho); S16(Phospho)	0	S(12): 50.0; S(13): 50.0; S(16): 100.0	1.34333e+07	0	1.587e-08	67.31	5.35048e-06	3	2665.1	-0.222049	18.6218	2
High	QEPLEEDsPSSSSAGLDK	1	1	1	P15408	S8(Phospho)	0	S(8): 97.3; S(10): 1.3; S(11): 1.3; S(12): 0.0; S(13): 0.0	4.26937e+06	0.001	0.004958	12.83	1.30559	2	1955.81	0.485445	16.9957	0
High	sPPAPGLQPmR	1	1	1	P15408	S1(Phospho); M10(Oxidation)	0	S(1): 100.0	1.40892e+07	0	9.627e-06	45.52	0.000483937	2	1246.57	0.532765	14.8647	0
High	sPPAPGLQPMR	1	1	1	P15408	S1(Phospho)	0	S(1): 100.0	1.30678e+07	0	1.858e-06	47.18	0.000342652	2	1230.57	-0.616596	18.5292	0
High	SSMsGLHLVK	1	1	1	Q13085	S4(Phospho)	0	S(1): 0.0; S(2): 0.0; S(4): 100.0	4.24064e+06	0	9.061e-06	66.72	6.63979e-06	2	1138.53	1.25856	15.5693	0
High	FIIGSVSEDNsEDEISNLVK	1	1	1	Q13085	S11(Phospho)	0	S(5): 0.0; S(7): 0.0; S(11): 99.9; S(16): 0.0	1.38891e+07	0	3.114e-05	14.76	1.16634	2	2275.04	1.7421	32.2931	0
High	SSmsGLHLVK	1	1	1	Q13085	M3(Oxidation); S4(Phospho)	0	S(1): 0.0; S(2): 0.0; S(4): 100.0	2.23278e+06	0.002	0.0269	27.02	0.044985	2	1154.53	0.887593	11.7982	0
High	LGAPENSGIStLER	1	1	1	Q9Y4F1	T11(Phospho)	0	S(7): 0.0; S(10): 0.7; T(11): 99.3	10835497	0	6.994e-09	66.37	5.73227e-06	2	1523.71	1.87568	18.7683	0
High	VSAGEPGSHPsPAPR	2	1	1	Q9Y4F1	S11(Phospho)	0	S(2): 0.0; S(8): 0.0; S(11): 100.0	7.83617e+06	0	0.002448	24.44	0.0888581	2	1525.68	3.54714	8.05758	0
High	SLHLsPQEQSASYQDR	3	1	1	Q9H410	S5(Phospho)	0	S(1): 50.0; S(5): 50.0; S(10): 0.0; S(12): 0.0; Y(13): 0.0	4.09728e+06	0	3.192e-06	56.13	7.54502e-05	3	1925.84	1.07759	14.6527	0
High	EVSsRPsTPGLSVVSGISATSEDIPNK	4	1	1	Q14C86	S4(Phospho); S7(Phospho)	0	S(3): 50.0; S(4): 50.0; S(7): 50.0; T(8): 50.0; S(12): 0.0; S(15): 0.0; S(18): 0.0; T(20): 0.0; S(21): 0.0	1.36412e+07	0	1.005e-07	42.56	0.0020327	3	2874.32	2.36695	27.9742	1
High	sSDIVSSVR	1	1	1	Q14C86	S1(Phospho)	0	S(1): 99.1; S(2): 0.9; S(6): 0.0; S(7): 0.0	5.21081e+06	0	0.0004211	45.57	0.000349438	2	1029.46	0.195325	14.7803	0
High	EDVEVAEsPLR	1	1	1	Q99567	S8(Phospho)	0	S(8): 100.0	1.05812e+07	0	4.77e-08	65.87	4.58114e-06	2	1323.58	0.783935	18.4482	0
High	NQSPTEAEKPASSSLPsSPPPQLLTR	1	1	1	Q99567	S17(Phospho)	0	S(3): 0.0; T(5): 0.1; S(12): 0.1; S(13): 0.1; S(14): 0.1; S(17): 2.4; S(18): 97.2; T(25): 0.1	4.5331e+06	0	0.002374	10.45	2.65062	3	2799.36	0.898217	20.8753	1
High	HQsFGAAVLSR	1	1	1	Q5VV41	S3(Phospho)	0	S(3): 100.0; S(10): 0.0	8.99868e+06	0	1.277e-06	65.69	5.16617e-06	2	1252.59	1.5268	15.3372	0
High	IQTLTSsVR	1	1	1	P16435	S7(Phospho)	0	T(3): 0.0; T(5): 0.0; S(6): 0.0; S(7): 100.0	1.9481e+06	0	0.001979	37.23	0.00296152	2	1084.54	0.666312	14.224	0
High	VAFDPEQKPLHGVLKtPTSsPASSPLVAK	6	1	1	Q14684	T16(Phospho); S20(Phospho)	0	T(16): 48.3; T(18): 48.3; S(19): 48.3; S(20): 48.3; S(23): 3.4; S(24): 3.4	5.15638e+06	0	0.001165	14.16	0.922816	3	3161.58	2.91899	23.0028	2
High	TPTSSPAssPLVAK	1	1	1	Q14684	S8(Phospho); S9(Phospho)	0	T(1): 2.1; T(3): 92.8; S(4): 3.1; S(5): 3.1; S(8): 49.5; S(9): 49.5	7.4487e+06	0	0.0006538	26.61	0.0469287	2	1502.66	0.802357	18.956	0
High	VGDGDLsAEEIPENEVSLR	1	1	1	Q14684	S7(Phospho)	0	S(7): 100.0; S(17): 0.0	2.42046e+07	0	4.166e-07	39.67	0.00322605	2	2108.94	1.07121	25.7936	0
High	SILVsPTGPSR	1	1	1	Q14684	S5(Phospho)	0	S(1): 0.0; S(5): 100.0; T(7): 0.0; S(10): 0.0	2.57518e+06	0	3.977e-06	44.47	0.000653809	2	1193.59	0.669481	19.3346	0
High	GsPTGGAQLLK	1	1	1	Q14684	S2(Phospho)	0	S(2): 100.0; T(4): 0.0	6.74738e+06	0	0.002736	30.62	0.0121375	2	1108.54	-0.0268636	15.8133	0
High	IDASKNEEDEGHSNSsPR	5	1	1	Q14103	S16(Phospho)	0	S(4): 0.0; S(13): 0.0; S(15): 0.7; S(16): 99.3	4.4755e+07	0	2.073e-12	45.09	0.000746478	3	2051.83	1.85067	5.97944	1
High	sAGEEEDGPVLTDEQK	1	1	1	Q66PJ3	S1(Phospho)	0	S(1): 100.0; T(12): 0.0	7.97186e+06	0	4.137e-08	65.35	6.30164e-06	2	1783.73	-1.06914	16.3794	0
High	PAsPVAGSPK	1	1	1	Q13057	S3(Phospho)	0	S(3): 100.0; S(8): 0.0	5.6061e+06	0	1.378e-06	65.25	3.77651e-06	2	990.466	0.16616	7.8277	0
High	NLsPGAVESDVR	1	1	1	P53621	S3(Phospho)	0	S(3): 100.0; S(9): 0.0	8.30284e+06	0	2.432e-06	65.21	5.22757e-06	2	1323.59	-0.69134	19.6274	0
High	SEAPAEVTHFsPK	1	1	1	Q6PID6	S11(Phospho)	0	S(1): 0.0; T(8): 0.0; S(11): 100.0	1.439e+07	0	3.775e-10	64.95	6.74967e-06	2	1479.65	0.444009	13.9939	0
High	KREEGsDIEDEDmEELLNDTR	1	1	1	Q8NHQ9	S6(Phospho); M13(Oxidation)	0	S(6): 100.0; T(20): 0.0	9.51774e+06	0	0.0007648	33.78	0.0123125	3	2619.08	-0.00232787	16.8806	2
High	KREEGsDIEDEDMEELLNDTR	1	1	1	Q8NHQ9	S6(Phospho)	0	S(6): 100.0; T(20): 0.0	2.4182e+07	0	1.129e-06	51.59	0.000218082	3	2603.09	3.5543	22.921	2
High	RLsTSPDVIQGHQPR	1	1	1	Q9Y385	S3(Phospho)	0	S(3): 99.6; T(4): 0.4; S(5): 0.0	1.38867e+07	0	5.404e-14	64.76	9.05669e-06	3	1770.87	0.331625	11.8327	1
High	tSPGRVDLPGSSTTLTK	2	1	1	O94875	T1(Phospho)	0	T(1): 98.8; S(2): 1.2; S(11): 0.0; S(12): 0.0; T(13): 0.0; T(14): 0.0; T(16): 0.0	1.36503e+07	0	0.002064	22.35	0.146399	2	1796.88	1.50214	17.1433	1
High	SFTSSSPSsPSR	1	1	1	O94875	S9(Phospho)	0	S(1): 0.0; T(3): 0.0; S(4): 0.0; S(5): 0.0; S(6): 0.0; S(8): 0.0; S(9): 99.3; S(11): 0.7	1.80935e+07	0	1.694e-07	58.97	1.79373e-05	2	1306.53	0.95974	10.0601	0
High	RKsEPAVGPPR	2	1	1	O94875	S3(Phospho)	0	S(3): 100.0	2.99438e+07	0.002	0.0231	21.6	0.127297	2	1273.64	1.3989	6.16319	2
High	DAsSPVPPPHVPPPVPPLRPR	2	1	1	O94875	S3(Phospho)	0	S(3): 50.0; S(4): 50.0	1.38941e+07	0	7.843e-06	13.65	0.612757	3	2289.19	1.48502	21.7483	1
High	sEPAVGPPR	1	1	1	O94875	S1(Phospho)	0	S(1): 100.0	6.04559e+06	0	0.0009472	29.88	0.0130558	2	989.445	-0.189376	12.7042	0
High	EVLYDsEGLsGEER	1	1	1	Q9H7N4	S6(Phospho); S10(Phospho)	0	Y(4): 0.0; S(6): 100.0; S(10): 100.0	4.67375e+06	0.001	0.01083	20.93	0.109784	2	1742.65	-0.585627	25.3206	0
High	GPsPAPASsPKR	1	1	1	Q9H7N4	S3(Phospho); S9(Phospho)	0	S(3): 100.0; S(8): 1.1; S(9): 98.9	5.36159e+06	0	0.0008472	32.93	0.00929529	2	1311.55	0.754327	7.22456	1
High	VPsTPPPK	1	1	1	Q9H7N4	S3(Phospho)	0	S(3): 0.0; T(4): 100.0	9.53616e+06	0	0.0008849	44.3	0.000453273	2	902.438	0.122807	7.63901	0
High	FDIYDPFHPTDEAYsPPPAPEQK	1	1	1	Q9H7N4	S15(Phospho)	0	Y(4): 0.0; T(10): 0.0; Y(14): 1.3; S(15): 98.7	9307418	0	2.696e-06	24.68	0.119143	3	2741.18	-0.616888	29.1505	0
High	sPFLKPDER	1	1	1	Q9H7N4	S1(Phospho)	0	S(1): 100.0	8.11063e+06	0.001	0.009019	37.82	0.0035765	2	1168.54	1.54147	12.6853	1
High	IGPLGLsPK	1	1	1	P30050	S7(Phospho)	0	S(7): 100.0	6.19785e+06	0	4.716e-05	53.55	7.30799e-05	2	961.512	0.471513	22.902	0
High	IQQFDDGGsDEEDIWEEK	1	1	1	Q5H9R7	S9(Phospho)	0	S(9): 100.0	3.27867e+07	0	2.622e-09	64.29	7.16854e-06	2	2219.87	2.60783	25.6489	0
High	TLTDEVNsPDSDRR	2	1	1	Q8TAQ2	S8(Phospho)	0	T(1): 0.0; T(3): 0.0; S(8): 100.0; S(11): 0.0	2.0832e+07	0	3.365e-08	50.36	0.000233794	3	1684.72	0.0178748	11.0231	1
High	DMDEPsPVPNVEEVTLPK	1	1	1	Q8TAQ2	S6(Phospho)	0	S(6): 100.0; T(15): 0.0	1.26544e+07	0	2.522e-05	30.18	0.0292137	2	2075.93	2.22087	30.1332	0
High	KRsPsPSPTPEAK	1	1	1	Q8TAQ2	S3(Phospho); S5(Phospho)	0	S(3): 100.0; S(5): 100.0; S(7): 0.0; T(9): 0.0	3.13611e+07	0	4.977e-05	28.91	0.030397	2	1541.68	1.8612	6.05646	2
High	TTPATGEQsPGAR	1	1	1	O00308	S9(Phospho)	0	T(1): 0.0; T(2): 0.0; T(5): 0.0; S(9): 100.0	9.98215e+06	0	6.048e-07	63.87	6.89143e-06	2	1352.59	0.82246	7.4644	0
High	SGAASMPsSPK	1	1	1	Q86SQ0	S8(Phospho)	0	S(1): 0.0; S(5): 0.0; S(8): 1.1; S(9): 98.9	1692545	0.002	0.02775	10.1	1.09451	2	1099.45	-0.65716	9.07666	0
High	KDsLPDADLAScGSLSQSSASFFTPR	1	1	1	Q86SQ0	S3(Phospho); C12(Carbamidomethyl)	0	S(3): 100.0; S(11): 0.0; S(14): 0.0; S(16): 0.0; S(18): 0.0; S(19): 0.0; S(21): 0.0; T(24): 0.0	8.65304e+06	0	5.568e-12	63.35	1.74086e-05	3	2824.25	-0.644212	27.5125	1
High	KAsQLVGIEK	1	1	1	Q9NPD8	S3(Phospho)	0	S(3): 100.0	2.49683e+06	0	0.001679	40.17	0.00189438	2	1152.6	0.73467	11.9522	1
High	EGSEFSFsDGEVAEK	1	1	1	Q9BVS4	S8(Phospho)	0	S(3): 0.0; S(6): 0.0; S(8): 100.0	5216026	0	2.39e-06	63.31	6.81323e-06	2	1697.66	1.28381	22.9037	0
High	tSSIADEGTYTLDSILR	3	1	1	Q9Y4I1	T1(Phospho)	0	T(1): 33.3; S(2): 33.3; S(3): 33.3; T(9): 0.0; Y(10): 0.0; T(11): 0.0; S(14): 0.0	6.67492e+06	0	8.871e-09	63.3	1.40321e-05	2	1921.88	1.696	32.2106	0
High	SFsADNFIGIQR	1	1	1	Q8N7R7	S3(Phospho)	0	S(1): 0.0; S(3): 100.0	4.66319e+06	0	2.048e-08	63.29	1.03373e-05	2	1434.64	0.611451	27.2209	0
High	NHEtDGGSAHGDDDDDGPHFEPVVPLPDKIEVK	2	1	1	P49792	T4(Phospho)	0	T(4): 50.0; S(8): 50.0	6.96701e+06	0.003	0.03899	10.2	4.01097	4	3618.56	-2.29829	22.5918	1
High	ELVGPPLAEtVFTPK	2	1	1	P49792	T10(Phospho)	0	T(10): 50.0; T(13): 50.0	5.25759e+06	0.001	0.005114	13.19	0.995447	2	1677.86	3.35912	31.592	0
High	SALSPSKsPAK	1	2	1	P49792	S8(Phospho)	0	S(1): 0.0; S(4): 0.0; S(6): 0.0; S(8): 100.0	0	0	0.0005385	31.91	0.0139141	2	1152.57	0.851925	6.1941	1
High	NHETDGGsAHGDDDDDGPHFEPVVPLPDK	2	1	1	P49792	S8(Phospho)	0	T(4): 0.0; S(8): 100.0	1.27081e+07	0	9.934e-07	22.58	0.182738	4	3149.28	1.78469	20.5205	0
High	EDALDDSVSSSSVHASPLASsPVRK	2	5	1	P49792	S21(Phospho)	0	S(7): 0.0; S(9): 0.0; S(10): 0.0; S(11): 0.0; S(12): 0.0; S(16): 0.0; S(20): 1.7; S(21): 98.3	2.24481e+07	0	8.446e-08	16.6	0.785406	3	2621.21	1.80796	17.5814	1
High	FESPATGILsPR	1	1	1	P49792	S10(Phospho)	0	S(3): 0.0; T(6): 0.0; S(10): 100.0	6.58792e+06	0	5.17e-06	53.46	0.000106167	2	1354.64	1.15972	24.2312	0
High	aDEAALALQPGGsPSAAGADR	3	1	1	Q96EB6	N-Term(Acetyl); S13(Phospho)	0	S(13): 98.7; S(15): 1.3	1.95968e+07	0	2.296e-08	27.37	0.0515797	3	2046.91	0.541458	31.259	0
High	SYsPDGKEsPSDKK	1	1	1	P43243	S3(Phospho); S9(Phospho)	0	S(1): 0.0; Y(2): 0.0; S(3): 100.0; S(9): 100.0; S(11): 0.0	3.808e+07	0	4.99e-05	33.61	0.00683754	2	1684.65	2.07336	6.12774	2
High	SYsPDGK	1	1	1	P43243	S3(Phospho)	0	S(1): 0.0; Y(2): 0.0; S(3): 100.0	8.17059e+06	0.009	0.1114	31.77	0.00399164	2	833.308	0.162715	6.01077	0
High	RDsFDDRGPSLNPVLDYDHGSR	3	1	1	P43243	S3(Phospho)	0	S(3): 100.0; S(10): 0.0; Y(17): 0.0; S(21): 0.0	7.72547e+07	0	1.137e-07	44.18	0.00132344	4	2598.14	1.26521	18.8549	2
High	NDsGEENVPLDLTR	1	1	1	Q6R327	S3(Phospho)	0	S(3): 100.0; T(13): 0.0	8.53982e+06	0	3.877e-07	62.99	1.10767e-05	2	1638.7	1.9923	24.1253	0
High	LNFDMTAsPK	1	1	1	Q9ULU4	S8(Phospho)	0	T(6): 0.0; S(8): 100.0	3.15551e+06	0	1.317e-06	58.45	2.15049e-05	2	1203.51	1.44657	21.7603	0
High	TGQAGSLsGSPKPFSPQLSAPITTK	3	1	1	Q9ULU4	S8(Phospho)	0	T(1): 0.0; S(6): 0.8; S(8): 49.2; S(10): 49.2; S(15): 0.8; S(19): 0.0; T(23): 0.0; T(24): 0.0	1.23313e+07	0	4.778e-07	30.47	0.0237819	3	2537.27	2.4467	22.7665	1
High	DKAsPEPEKDFSEK	2	1	1	Q9ULU4	S4(Phospho)	0	S(4): 100.0; S(12): 0.0	6.12946e+06	0	0.001164	23.36	0.104719	3	1686.73	-0.070613	8.69706	2
High	TSFSVGsDDELGPIR	1	1	1	Q9NRY4	S7(Phospho)	0	T(1): 0.0; S(2): 0.0; S(4): 0.0; S(7): 100.0	7.74762e+06	0	1.414e-07	62.66	1.1924e-05	2	1659.73	0.509771	26.0652	0
High	VIEtPENDFK	1	1	1	Q9H0G5	T4(Phospho)	0	T(4): 100.0	4.54649e+06	0	0.002248	35.24	0.0051467	2	1271.56	0.773739	16.717	0
High	TQQLHPVLQKPSVFGNDsDDDDETSVSESLQR	1	1	1	Q9H0G5	S18(Phospho)	0	T(1): 0.0; S(12): 96.9; S(18): 1.6; T(24): 1.6; S(25): 0.0; S(27): 0.0; S(29): 0.0	1.6358e+07	0	2.633e-06	48.61	0.000540555	4	3651.65	0.23778	22.561	1
High	KKsPNELVDDLFK	2	1	1	Q9UNZ2	S3(Phospho)	0	S(3): 100.0	1.35303e+07	0	1.39e-05	37.68	0.00428227	2	1612.8	-0.243762	20.8406	2
High	sPQQSAALPR	1	1	1	Q6IBW4	S1(Phospho)	0	S(1): 100.0; S(5): 0.0	8.54522e+06	0	1.478e-06	61.44	1.33151e-05	2	1134.53	-0.0363708	12.2552	0
High	VTNDIsPESSPGVGR	1	1	1	Q15154	S6(Phospho)	0	T(2): 0.0; S(6): 100.0; S(9): 0.0; S(10): 0.0	7.096e+06	0	4.929e-08	53.78	9.27628e-05	2	1594.71	0.645484	15.1721	0
High	KAsAQASLASK	1	1	1	Q15154	S3(Phospho)	0	S(3): 50.0; S(7): 50.0; S(10): 0.0	751685	0	0.0003411	33.57	0.00762605	2	1141.56	0.102199	5.79159	1
High	RGsLSNAGDPEIVK	2	1	1	O43847	S3(Phospho)	0	S(3): 100.0; S(5): 0.0	4.92208e+07	0	6.437e-06	45.67	0.000612503	2	1522.72	-1.6496	12.9106	1
High	RPEsPSEIsPIKGSVR	1	1	1	Q7Z5K2	S4(Phospho); S9(Phospho)	0	S(4): 100.0; S(6): 0.0; S(9): 100.0; S(14): 0.0	5.63309e+06	0.001	0.004407	19.1	0.335248	3	1898.88	1.01813	14.3823	2
High	RPEsPSEISPIK	1	1	1	Q7Z5K2	S4(Phospho)	0	S(4): 100.0; S(6): 0.0; S(9): 0.0	1.28897e+07	0.001	0.003601	31.67	0.0144663	2	1419.69	1.57136	13.964	1
High	VEEESTGDPFGFDsDDESLPVSSK	1	1	1	Q7Z5K2	S14(Phospho)	0	S(5): 0.0; T(6): 0.0; S(14): 100.0; S(18): 0.0; S(22): 0.0; S(23): 0.0	1.40629e+07	0	8.322e-08	49.09	0.000371165	2	2653.08	2.36782	29.3512	0
High	SLAALDALNtDDENDEEEYEAWK	2	1	1	P55081	T10(Phospho)	0	S(1): 0.0; T(10): 100.0; Y(19): 0.0	2.74279e+07	0	2.345e-11	63.62	1.4643e-05	2	2721.11	0.572142	31.0691	0
High	IVEPEVVGEsDsEVEGDAWR	1	1	1	P55081	S10(Phospho); S12(Phospho)	0	S(10): 100.0; S(12): 100.0	2.10818e+07	0	5.51e-05	15.87	0.722111	2	2361.95	0.18847	31.3536	0
High	GAPSsPATGVLPSPQGK	2	1	1	Q5SRE5	S5(Phospho)	0	S(4): 1.4; S(5): 98.6; T(8): 0.0; S(13): 0.0	1.47278e+07	0	9.638e-08	60.97	2.09557e-05	2	1630.79	0.91462	19.1318	0
High	RPEGPGAQAPsSPR	2	1	1	P40222	S11(Phospho)	0	S(11): 50.0; S(12): 50.0	7.03123e+07	0	9.683e-06	38.07	0.00378971	2	1486.68	0.7019	7.20394	1
High	sSPGQPEAGPEGAQERPSQAAPAVEAEGPGSSQAPR	5	1	1	P40222	S1(Phospho)	0	S(1): 49.5; S(2): 49.5; S(18): 1.1; S(31): 0.0; S(32): 0.0	2.2624e+07	0	2.252e-07	44.16	0.00169023	4	3564.6	0.586476	16.1806	1
High	WTKPSSFsDSER	1	1	1	Q8NC56	S8(Phospho)	0	T(2): 0.0; S(5): 0.0; S(6): 0.0; S(8): 100.0; S(10): 0.0	1.73244e+07	0	0.0002287	60.78	1.7297e-05	2	1506.63	2.12246	12.5052	1
High	GPVsPSVSFQPLAR	1	1	1	Q7Z434	S4(Phospho)	0	S(4): 100.0; S(6): 0.0; S(8): 0.0	4.91472e+06	0	1.001e-07	60.72	2.02487e-05	2	1521.75	1.65108	26.1071	0
High	AETSEGSGSAPAVPEASAsPK	1	1	1	P51608	S19(Phospho)	0	T(3): 0.0; S(4): 0.0; S(7): 0.0; S(9): 0.0; S(17): 0.0; S(19): 100.0	1.10628e+07	0	2.42e-10	60.6	2.59983e-05	2	2009.87	1.09344	14.8079	0
High	EKPELSEPSHLNGPsSDPEAAFLSR	2	1	1	Q9H4A3	S15(Phospho)	0	S(6): 0.0; S(9): 0.0; S(15): 50.0; S(16): 50.0; S(24): 0.0	2.18151e+07	0	1.23e-05	27.77	0.0640863	3	2774.27	1.44468	21.2762	1
High	DVDDGSGSPHsPHQLSSK	1	1	1	Q9H4A3	S11(Phospho)	0	S(6): 0.0; S(8): 0.0; S(11): 100.0; S(16): 0.0; S(17): 0.0	1.17492e+07	0	6.417e-09	53.29	0.000118844	3	1929.8	1.17396	7.88553	0
High	VLsPTAAK	1	1	1	Q96QC0	S3(Phospho)	0	S(3): 98.7; T(5): 1.3	2.01491e+06	0.003	0.03481	23.87	0.0508653	2	866.438	-0.646972	11.5173	0
High	VLsPTAAKPSPFEGK	1	1	1	Q96QC0	S3(Phospho)	0	S(3): 100.0; T(5): 0.0; S(10): 0.0	1.18525e+07	0	1.047e-07	60.5	1.99195e-05	2	1608.81	1.67551	16.8352	1
High	SNsPLPVPPSK	4	1	1	Q13247	S3(Phospho)	0	S(1): 0.0; S(3): 100.0; S(10): 0.0	8.9421e+07	0	9.128e-05	43.27	0.000826565	2	1202.58	0.491184	16.9473	0
High	TPsSEEISPTK	1	1	1	Q15311	S3(Phospho)	0	T(1): 0.0; S(3): 50.0; S(4): 50.0; S(8): 0.0; T(10): 0.0	6.00924e+06	0	5.634e-07	60.41	1.51956e-05	2	1255.55	0.335843	11.7773	0
High	tEcFLPPtSSPSEHR	3	1	1	Q15311	N-Term(Acetyl); C3(Carbamidomethyl); T8(Phospho)	0	T(1): 0.0; T(8): 33.2; S(9): 33.2; S(10): 33.2; S(12): 0.4	7.54936e+06	0.001	0.004305	12.14	1.41739	2	1866.77	-0.652065	24.5789	0
High	APGsPAAPR	1	1	1	Q9NQX5	S4(Phospho)	0	S(4): 100.0	8.51219e+06	0	0.000192	60.27	1.14176e-05	2	903.408	-0.0990758	7.4397	0
High	VmTIPYQPMPAsSPVIcAGGQDR	2	1	1	Q15365	M2(Oxidation); S12(Phospho); C17(Carbamidomethyl)	0	T(3): 1.0; Y(6): 0.0; S(12): 49.5; S(13): 49.5	5.68659e+06	0	1.459e-05	17.32	0.636688	3	2571.15	0.850279	26.6847	0
High	GREDVSNFDDEFTSEAPILtPPREPR	1	1	1	Q16513	T20(Phospho)	0	S(6): 0.0; T(13): 0.0; S(14): 0.0; T(20): 100.0	5.1376e+07	0	0.0004202	19.52	0.427759	4	3054.38	-0.408274	24.584	2
High	EDVSNFDDEFTSEAPILtPPREPR	1	1	1	Q16513	T18(Phospho)	0	S(4): 0.0; T(11): 0.0; S(12): 0.0; T(18): 100.0	2.54768e+07	0	0.002001	18.02	0.6271	3	2841.27	1.5532	28.0862	1
High	AIPTVNHsGTFSPQAPVPTTVPVVDVR	4	1	1	Q16513	S8(Phospho)	0	T(4): 33.1; S(8): 33.1; T(10): 33.1; S(12): 0.8; T(19): 0.0; T(20): 0.0	7.98993e+06	0	1.97e-05	25.46	0.0635737	3	2866.44	-3.77828	27.5224	0
High	AsSLGEIDESSELR	1	1	1	Q16513	S2(Phospho)	0	S(2): 0.0; S(3): 100.0; S(10): 0.0; S(11): 0.0	1.87942e+07	0	2.389e-06	56.79	3.49717e-05	2	1572.68	0.569009	20.7824	0
High	RAsQEANLLTLAQK	2	1	1	Q6PJG2	S3(Phospho)	0	S(3): 100.0; T(10): 0.0	8.81334e+06	0	5.884e-05	34.81	0.00743331	2	1622.83	0.894745	19.3855	1
High	DAsPINR	1	1	1	Q13523	S3(Phospho)	0	S(3): 100.0	1.81548e+06	0.002	0.02197	29.19	0.0100018	2	852.361	-0.394073	7.68734	0
High	KKsPIINESR	2	1	1	Q13523	S3(Phospho)	0	S(3): 100.0; S(9): 0.0	1.72537e+07	0.001	0.01369	31.05	0.0143698	2	1251.65	1.51665	5.34396	2
High	LcDFGSASHVADNDITPyLVSR	2	1	1	Q13523	C2(Carbamidomethyl); Y18(Phospho)	0	S(6): 0.0; S(8): 0.0; T(16): 0.0; Y(18): 100.0; S(21): 0.0	1.05326e+08	0	4.608e-12	31.18	0.0292257	3	2517.12	2.10606	25.1284	0
High	GRLsPVPVPR	2	1	1	Q9UKM9	S4(Phospho)	0	S(4): 100.0	5.83004e+07	0.001	0.007268	45.58	0.000397056	2	1157.62	1.63005	14.5296	1
High	LsPVPVPR	1	1	1	Q9UKM9	S2(Phospho)	0	S(2): 100.0	2.59637e+06	0	0.001809	28.46	0.0220969	2	944.496	-0.230648	19.5396	0
High	TRDDGDEEGLLTHsEEELEHSQDTDADDGALQ	3	1	1	Q9UKM9	S14(Phospho)	0	T(1): 0.0; T(12): 2.0; S(14): 97.9; S(21): 0.0; T(24): 0.0	58470788	0	1.105e-05	30.79	0.0282618	3	3607.45	2.3221	20.4546	1
High	VAQGATEKsPEDK	1	1	1	P49321	S9(Phospho)	0	T(6): 0.0; S(9): 100.0	4.25174e+06	0	1.95e-06	53.24	9.48484e-05	2	1439.64	1.40862	5.18584	1
High	LVPsQEETK	1	1	1	P49321	S4(Phospho)	0	S(4): 100.0; T(8): 0.0	3.24546e+06	0.009	0.1037	14.81	0.588058	2	1110.51	0.63054	9.72983	0
High	GGAAPEGPNEAEVTSGKPEQEVPDAEEEKsVSGTDVQEEcR	1	1	1	P49321	S30(Phospho); C40(Carbamidomethyl)	0	T(14): 0.0; S(15): 0.0; S(30): 99.9; S(32): 0.1; T(34): 0.0	1.76636e+07	0	1.302e-05	30.32	0.039063	4	4378.89	3.04638	16.8957	2
High	APIDTsDVEEK	1	1	1	Q06265	S6(Phospho)	0	T(5): 0.6; S(6): 99.4	1.42089e+07	0	5.648e-07	58.93	1.78474e-05	2	1283.54	0.474355	14.9971	0
High	DYSEADGLsER	1	1	1	Q9H4G0	S9(Phospho)	0	Y(2): 0.0; S(3): 0.0; S(9): 100.0	1.94128e+06	0	0.00168	36.75	0.00229314	2	1321.5	1.10852	15.5525	0
High	DKSDsDTEGLLFSR	1	1	1	Q9H4G0	S5(Phospho)	0	S(3): 0.0; S(5): 100.0; T(7): 0.0; S(13): 0.0	3.25658e+06	0	1.318e-06	36.26	0.0057965	2	1649.71	0.875597	21.9843	1
High	HQAsINELKR	1	1	1	Q9H4G0	S4(Phospho)	0	S(4): 100.0	5.63811e+06	0.003	0.0404	36.27	0.00422526	3	1275.62	-0.832403	7.22112	1
High	ALDVSAsDDEIAR	1	1	1	P13798	S7(Phospho)	0	S(5): 0.0; S(7): 100.0	3.00066e+06	0	3.453e-06	58.74	3.74915e-05	2	1441.62	-1.14881	19.4271	0
High	EtVSEAPPLLFSDEEEKEAQLGVK	1	2	2	Q641Q2;Q9Y4E1	T2(Phospho)	0	T(2): 49.5; S(4): 1.0; S(12): 49.5	1.03602e+07	0.001	0.01008	11.57	2.34415	3	2725.3	3.97778	26.8102	1
High	TVLsLFDEEEDKmEDQNIIQAPQK	2	2	2	Q641Q2;Q9Y4E1	S4(Phospho); M13(Oxidation)	0	T(1): 50.0; S(4): 50.0	8.77669e+06	0.001	0.01111	15.42	1.17558	3	2916.33	1.59416	29.6119	1
High	AVAsPEATVSQTDENK	1	2	2	Q641Q2;Q9Y4E1	S4(Phospho)	0	S(4): 100.0; T(8): 0.0; S(10): 0.0; T(12): 0.0	4.90335e+06	0	5.346e-07	39.84	0.00249526	2	1726.75	0.65311	13.897	0
High	RTPsDDEEDNLFAPPK	2	2	2	Q641Q2;Q9Y4E1	S4(Phospho)	0	T(2): 50.0; S(4): 50.0	2.38092e+07	0	5.692e-05	33.69	0.0121642	2	1910.82	0.930917	19.0124	1
High	GLFsDEEDSEDLFSSQSASNLK	2	1	1	Q9Y4E1	S4(Phospho)	0	S(4): 100.0; S(9): 0.0; S(14): 0.0; S(15): 0.0; S(17): 0.0; S(19): 0.0	3.79317e+06	0	5.978e-05	26.68	0.0674419	2	2485.04	3.72444	31.9971	0
High	SPMFPALGEAsSDDDLFQSAKPK	2	2	2	Q641Q2;Q9Y4E1	S11(Phospho)	0	S(1): 0.0; S(11): 50.0; S(12): 50.0; S(19): 0.0	4.29921e+06	0	9.158e-05	10.25	3.37974	3	2518.12	-2.01121	28.7565	1
High	sRPtSFADELAAR	2	2	2	Q641Q2;Q9Y4E1	S1(Phospho); T4(Phospho)	0	S(1): 100.0; T(4): 50.0; S(5): 50.0	5.8956e+06	0.006	0.07168	12.63	1.07514	2	1580.65	1.09958	22.3426	1
High	VGVSSKPDsSPVLSPGNK	2	1	1	Q8N4C8	S9(Phospho)	0	S(4): 0.0; S(5): 0.0; S(9): 50.0; S(10): 50.0; S(14): 0.0	5.81083e+06	0	9.55e-07	34.39	0.00998947	2	1834.9	4.77828	13.4182	1
High	SNsAWQIYLQR	1	1	1	Q8N4C8	S3(Phospho)	0	S(1): 0.8; S(3): 99.2; Y(8): 0.0	1.88853e+06	0	0.0005479	23.03	0.108507	2	1445.66	-0.46933	26.2585	0
High	SDSVLPASHGHLPQAGsLER	1	1	1	Q8N4C8	S17(Phospho)	0	S(1): 0.0; S(3): 0.0; S(8): 0.0; S(17): 100.0	1.99612e+07	0	1.79e-05	43.53	0.00132639	3	2138.01	1.4023	16.3365	0
High	SGGIVIsPFR	1	1	1	Q16204	S7(Phospho)	0	S(1): 0.0; S(7): 100.0	1.7141e+06	0	0.0001108	27.57	0.0314097	2	1112.55	-0.280512	25.1068	0
High	LDQPVsAPPsPR	1	1	1	Q16204	S6(Phospho); S10(Phospho)	0	S(6): 100.0; S(10): 100.0	3.5176e+07	0	0.0002063	40.41	0.0015605	2	1423.61	4.33864	19.1485	0
High	TVsSPIPYTPSPSSSR	3	1	1	Q16204	S3(Phospho)	0	T(1): 0.9; S(3): 49.6; S(4): 49.6; Y(8): 0.0; T(9): 0.0; S(11): 0.0; S(13): 0.0; S(14): 0.0; S(15): 0.0	7.6038e+06	0	0.0001223	20.66	0.240953	2	1742.8	1.47544	19.6945	0
High	PIsPGLSYASHTVGFTPPTSLTR	1	1	1	Q16204	S3(Phospho)	0	S(3): 100.0; S(7): 0.0; Y(8): 0.0; S(10): 0.0; T(12): 0.0; T(16): 0.0; T(19): 0.0; S(20): 0.0; T(22): 0.0	8.47056e+06	0	6.403e-08	26.95	0.0561106	3	2466.21	-0.385913	26.8509	0
High	RsNSPDKFK	2	1	1	Q16204	S2(Phospho)	0	S(2): 50.0; S(4): 50.0	0	0.008	0.09219	15.09	0.603997	2	1158.53	1.12341	0.0173143	2
High	LDQPVSAPPsPR	1	1	1	Q16204	S10(Phospho)	0	S(6): 0.0; S(10): 100.0	1.70822e+07	0	0.0004521	32.41	0.011712	2	1343.64	1.07037	15.8899	0
High	TAsELLLDR	1	1	1	Q92508	S3(Phospho)	0	T(1): 0.0; S(3): 100.0	9.37305e+06	0	0.0001809	58.38	3.05669e-05	2	1097.52	0.19421	23.0663	0
High	ENsPNSFPR	1	1	1	Q9P260	S3(Phospho)	0	S(3): 100.0; S(6): 0.0	4.94058e+06	0	0.0003697	41.07	0.000875423	2	1127.45	0.592377	12.6801	0
High	AGsISTLDSLDFAR	1	1	1	Q9P260	S3(Phospho)	0	S(3): 100.0; S(5): 0.0; T(6): 0.0; S(9): 0.0	1.9994e+06	0	3.125e-05	40.33	0.00240512	2	1532.7	1.09156	28.9548	0
High	MLPHAPGVQMQAIPEDAIPEEsGDEDEDDPDKR	2	1	1	Q13547	S22(Phospho)	0	S(22): 100.0	8.09724e+07	0	1.778e-11	25.94	0.101491	4	3711.59	0.872397	24.253	1
High	mLPHAPGVQMQAIPEDAIPEEsGDEDEDDPDKR	3	1	1	Q13547	M1(Oxidation); S22(Phospho)	0	S(22): 100.0	4.46343e+07	0	1.589e-10	15.16	1.23897	4	3727.59	3.14974	23.6429	1
High	mLPHAPGVQmQAIPEDAIPEEsGDEDEDDPDKR	1	1	1	Q13547	M1(Oxidation); M10(Oxidation); S22(Phospho)	0	S(22): 100.0	3.68578e+07	0	5.564e-07	19.71	0.427622	4	3743.57	-0.78787	21.0263	1
High	RSDsLLSFR	1	1	1	Q00587	S4(Phospho)	0	S(2): 0.0; S(4): 100.0; S(7): 0.0	5.72687e+06	0	0.002139	39.68	0.00187305	2	1160.55	0.258453	17.8473	1
High	SDsLLSFR	1	1	1	Q00587	S3(Phospho)	0	S(1): 0.0; S(3): 100.0; S(6): 0.0	3.08995e+06	0	0.001211	42.46	0.000561869	2	1004.45	0.465728	24.1339	0
High	LNtSDFQK	1	1	1	Q96B36	T3(Phospho)	0	T(3): 100.0; S(4): 0.0	2.66242e+07	0.001	0.005955	47.82	0.000148677	2	1032.44	0.417308	11.7361	0
High	AATAARPPAPPPAPQPPsPTPsPPRPTLAR	2	1	1	Q96B36	S18(Phospho); S22(Phospho)	0	T(3): 0.0; S(18): 99.9; T(20): 0.1; S(22): 99.9; T(27): 0.1	7.43953e+07	0	1.518e-05	10.31	2.11827	4	3124.56	1.79581	20.8736	2
High	SSDEENGPPsSPDLDR	2	1	1	Q96B36	S10(Phospho)	0	S(1): 0.0; S(2): 0.0; S(10): 50.0; S(11): 50.0	5.11274e+06	0	2.621e-06	33.53	0.00592218	2	1781.69	-0.363603	14.5119	0
High	LFRPPsPAPAAPGAR	2	1	1	Q86U90	S6(Phospho)	0	S(6): 100.0	2.87787e+07	0	2.479e-05	31.88	0.0133943	3	1584.81	0.339896	16.9101	1
High	LPGSGAVQAAsPER	1	1	1	Q86U90	S11(Phospho)	0	S(4): 0.0; S(11): 100.0	2.21852e+06	0	4.077e-05	52.15	0.000154518	2	1419.67	1.91076	14.0936	0
High	LKsVEDEMDSPGEEPFYTGQGR	2	1	1	Q12857	S3(Phospho)	0	S(3): 98.2; S(10): 1.8; Y(17): 0.0; T(18): 0.0	6.92897e+06	0	3.673e-05	28.75	0.0412058	3	2551.07	-0.745254	21.6006	1
High	sVEDEmDSPGEEPFYTGQGR	2	1	1	Q12857	S1(Phospho); M6(Oxidation)	0	S(1): 50.0; S(8): 50.0; Y(15): 0.0; T(16): 0.0	6.28325e+06	0	1.02e-07	46.02	0.000455063	2	2325.88	-0.268318	21.2315	0
High	sPGSGSQSSGWHEVEPGMPSPTTLK	1	1	1	Q12857	S1(Phospho)	0	S(1): 100.0; S(4): 0.0; S(6): 0.0; S(8): 0.0; S(9): 0.0; S(20): 0.0; T(22): 0.0; T(23): 0.0	3.52345e+07	0	6.402e-08	16.84	0.805285	3	2620.14	1.63165	21.5193	0
High	GSASYsPPR	1	1	1	P0DPB5	S6(Phospho)	0	S(2): 0.0; S(4): 0.0; Y(5): 0.0; S(6): 100.0	4452936	0	0.0001476	57.05	2.28801e-05	2	1001.41	0.516329	10.0216	0
High	TEPSsPLSDPSDIIR	1	1	1	Q9ULJ3	S5(Phospho)	0	T(1): 0.0; S(4): 1.4; S(5): 98.6; S(8): 0.0; S(11): 0.0	5.62448e+06	0	0.0004207	15.92	0.685701	2	1693.77	0.0730769	25.2401	0
High	SFsASQSTDR	1	1	1	Q9ULJ3	S3(Phospho)	0	S(1): 0.0; S(3): 100.0; S(5): 0.0; S(7): 0.0; T(8): 0.0	3.31702e+06	0	0.0003658	39.22	0.00116084	2	1165.45	0.657391	9.21227	0
High	sLSmDSQVPVYSPSIDLK	3	1	1	Q9ULJ3	S1(Phospho); M4(Oxidation)	0	S(1): 33.3; S(3): 33.3; S(6): 33.3; Y(11): 0.0; S(12): 0.0; S(14): 0.0	2.09542e+06	0	0.0007585	20.79	0.262193	2	2061.95	3.08752	28.2538	0
High	sLSMDSQVPVYSPSIDLK	2	1	1	Q9ULJ3	S1(Phospho)	0	S(1): 98.6; S(3): 1.4; S(6): 0.0; Y(11): 0.0; S(12): 0.0; S(14): 0.0	4.2348e+06	0	1.349e-06	40.82	0.0026163	2	2045.95	0.268282	30.2522	0
High	LTVENsPKQEAGISEGQGTAGEEEEK	2	1	1	O43583	S6(Phospho)	0	T(2): 1.3; S(6): 98.7; S(14): 0.0; T(19): 0.0	3.209e+07	0	5.035e-09	56.81	7.74388e-05	3	2797.25	1.62675	14.1717	1
High	SEsELIDELSEDFDR	1	1	1	P20810	S3(Phospho)	0	S(1): 1.0; S(3): 99.0; S(10): 0.0	7.97388e+06	0	0.0001376	26.72	0.0469255	2	1863.75	-0.48041	35.6141	0
High	KEGITGPPADSSKPIGPDDAIDALSSDFTcGsPTAAGK	1	1	1	P20810	C30(Carbamidomethyl); S32(Phospho)	0	T(5): 0.0; S(11): 0.0; S(12): 0.0; S(25): 0.0; S(26): 0.0; T(29): 0.0; S(32): 97.3; T(34): 2.7	1.85224e+07	0	8.137e-12	26.68	0.0796845	4	3810.75	1.87516	26.5912	2
High	asPGKDNYR	1	1	1	O15131	N-Term(Acetyl); S2(Phospho)	0	S(2): 100.0; Y(8): 0.0	8.99938e+06	0	0.0003993	56.78	2.82307e-05	2	1129.47	-0.182932	8.86674	1
High	RKPsVPDSASPADDSFVDPGER	3	1	1	P16333	S4(Phospho)	0	S(4): 100.0; S(8): 0.0; S(10): 0.0; S(15): 0.0	5.2498e+07	0	4.612e-08	56.73	6.92178e-05	3	2409.07	1.20833	16.1197	2
High	GVNTFsPEGR	1	1	1	P28066	S6(Phospho)	0	T(4): 0.0; S(6): 100.0	5.37111e+06	0	0.0001031	49.96	0.000138268	2	1143.48	0.531601	13.8526	0
High	ITsPLmEPSSIEK	2	1	1	P28066	S3(Phospho); M6(Oxidation)	0	T(2): 1.4; S(3): 98.6; S(9): 0.0; S(10): 0.0	2.09876e+06	0.001	0.003966	17.74	0.39038	2	1527.7	0.601384	19.1622	0
High	RLsYNTASNK	1	1	1	P49207	S3(Phospho)	0	S(3): 100.0; Y(4): 0.0; T(6): 0.0; S(8): 0.0	1.05166e+08	0	2.731e-05	56.35	5.19096e-05	2	1233.56	-0.154765	6.73398	1
High	PVPDsPVSVTR	1	1	1	Q9BXS9	S5(Phospho)	0	S(5): 100.0; S(8): 0.0; T(10): 0.0	2.53968e+07	0	1.776e-05	56.32	4.00188e-05	2	1233.59	0.114936	16.3959	0
High	SSPNPFVGsPPK	3	1	1	P98082	S9(Phospho)	0	S(1): 0.0; S(2): 0.0; S(9): 100.0	5.03694e+07	0	0.0004202	48.64	0.000227727	2	1293.59	0.675798	19.2062	0
High	sSPNPFVGsPPK	2	1	1	P98082	S1(Phospho); S9(Phospho)	0	S(1): 50.0; S(2): 50.0; S(9): 100.0	5.90281e+06	0.001	0.005236	15.6	0.33877	2	1373.55	0.175783	24.5772	0
High	TEtQEKNPLPSK	1	1	1	P62328	T3(Phospho)	0	T(1): 0.0; T(3): 100.0; S(11): 0.0	474037	0.001	0.01065	16.8	0.417859	2	1451.68	0.644933	8.49796	1
High	sDKPDMAEIEK	1	1	1	P62328	N-Term(Acetyl); S1(Phospho)	0	S(1): 100.0	4.49693e+06	0	0.001692	35.7	0.00422571	2	1384.57	1.47766	17.3969	1
High	LLsSNEDDANILSSPTDR	2	1	1	O75448	S3(Phospho)	0	S(3): 50.0; S(4): 50.0; S(13): 0.0; S(14): 0.0; T(16): 0.0	2.93016e+06	0	9.373e-08	55.99	6.81032e-05	2	2026.9	2.38911	26.7067	0
High	LAAPSVSHVsPR	1	1	1	Q8WXE1	S10(Phospho)	0	S(5): 0.0; S(7): 0.0; S(10): 100.0	6.07237e+06	0	4.482e-06	55.99	5.80325e-05	2	1300.64	1.16969	12.9123	0
High	RPNEDsDEDEEKGAVVPPVHDIYR	2	1	1	Q12996	S6(Phospho)	0	S(6): 100.0; Y(23): 0.0	3.81429e+07	0	2.889e-10	55.78	0.000106753	3	2846.27	2.24153	15.9607	2
High	tPPAPSPFDLPELK	1	1	1	O95239	T1(Phospho)	0	T(1): 100.0; S(6): 0.0	1.86646e+06	0.001	0.005652	17.96	0.418284	2	1588.77	0.0670393	31.6629	0
High	TFsLTEVR	1	1	1	O95239	S3(Phospho)	0	T(1): 0.0; S(3): 100.0; T(5): 0.0	5.93019e+06	0	9.092e-05	55.77	3.48278e-05	2	1032.48	0.286426	22.1117	0
High	NPYLLsEEEDDDVDGDVNVEK	1	1	1	O60524	S6(Phospho)	0	Y(3): 0.0; S(6): 100.0	1.37709e+07	0	2.972e-09	55.77	7.77335e-05	2	2474.01	-0.950891	25.7037	0
High	TDSREDEIsPPPPNPVVK	2	1	1	P10644	S9(Phospho)	0	T(1): 0.0; S(3): 0.0; S(9): 100.0	5.7099e+07	0	3.953e-10	30.15	0.0301408	3	2056.96	0.555069	17.354	1
High	EDEIsPPPPNPVVK	1	1	1	P10644	S5(Phospho)	0	S(5): 100.0	1.55666e+07	0	3.164e-05	46.06	0.000629265	2	1597.75	1.45905	21.0928	0
High	EGEtQGVAFEHESPADFQNSQSPVQDQDK	1	1	1	P78332	T4(Phospho)	0	T(4): 98.3; S(13): 0.0; S(20): 0.0; S(22): 1.7	1.96115e+07	0	9.276e-05	29.41	0.0456487	3	3284.37	2.01532	19.9636	0
High	LQSFDsPER	1	1	1	P78332	S6(Phospho)	0	S(3): 0.0; S(6): 100.0	3.8629e+06	0	9.089e-05	45.66	0.000359928	2	1158.48	-0.130132	13.9324	0
High	NTDVAQsPEAPKQEAPAK	1	1	1	Q9P2E9	S7(Phospho)	0	T(2): 0.0; S(7): 100.0	1.7596e+06	0	0.0006029	18.58	0.413253	2	1960.9	1.25545	9.49197	1
High	SHVEDGDIAGAPAsSPEAPPAEQDPVQLK	2	1	1	Q9P2E9	S14(Phospho)	0	S(1): 0.0; S(14): 50.0; S(15): 50.0	1.404e+07	0	1.777e-10	42.15	0.00259053	3	2992.37	2.94106	21.1245	0
High	LSGINEIPRPFSPPVtSNTsPPPAAPLAR	6	1	1	Q0JRZ9	T16(Phospho); S20(Phospho)	0	S(2): 33.3; S(12): 33.3; T(16): 33.3; S(17): 33.3; T(19): 33.3; S(20): 33.3	9.28216e+06	0	2.687e-05	14.79	0.982408	3	3143.55	5.20881	32.0083	1
High	VSIGNITLsPAISR	1	1	1	Q0JRZ9	S9(Phospho)	0	S(2): 0.0; T(7): 0.0; S(9): 100.0; S(13): 0.0	9.13274e+06	0	6.397e-08	44.05	0.000781197	2	1507.79	0.458677	29.7252	0
High	NLsNEELTK	1	1	1	Q0JRZ9	S3(Phospho)	0	S(3): 100.0; T(8): 0.0	2.52487e+06	0.001	0.008936	26.7	0.0345281	2	1127.5	-2.34446	13.2588	0
High	LSGINEIPRPFsPPVTSNTSPPPAAPLAR	1	1	1	Q0JRZ9	S12(Phospho)	0	S(2): 0.0; S(12): 96.6; T(16): 1.7; S(17): 1.7; T(19): 0.0; S(20): 0.0	1.45628e+07	0	2.611e-06	28.63	0.0291312	3	3063.56	-1.24237	28.0896	1
High	SGsVYEPLK	1	1	1	Q93100	S3(Phospho)	0	S(1): 0.0; S(3): 100.0; Y(5): 0.0	2.50057e+06	0	2.388e-05	55.3	3.27584e-05	2	1059.47	-1.12823	16.5097	0
High	SQLDDHPEsDDEENFIDANDDEDmEK	1	1	1	Q03701	S9(Phospho); M24(Oxidation)	0	S(1): 0.0; S(9): 100.0	2.14214e+07	0	9.461e-07	31.19	0.0113289	3	3148.13	-1.15031	20.2599	0
High	SQLDDHPEsDDEENFIDANDDEDMEK	1	1	1	Q03701	S9(Phospho)	0	S(1): 1.5; S(9): 98.5	4.26059e+07	0	2.692e-08	43.45	0.00090823	3	3132.15	1.62432	21.9493	0
High	ATHGSNsLPSSAR	1	1	1	Q8TDM6	S7(Phospho)	0	T(2): 0.0; S(5): 0.0; S(7): 100.0; S(10): 0.0; S(11): 0.0	2.44907e+06	0.001	0.009343	25.72	0.0488948	2	1364.59	-4.27608	6.40834	0
High	LGsSSNLQFK	1	1	1	Q8TDM6	S3(Phospho)	0	S(3): 100.0; S(4): 0.0; S(5): 0.0	2.30339e+06	0	3.698e-06	54.81	5.66584e-05	2	1160.53	0.161484	18.3688	0
High	LsLDLSHR	1	1	1	Q8TDM6	S2(Phospho)	0	S(2): 100.0; S(6): 0.0	3.79186e+06	0.001	0.006847	20.97	0.133572	2	1020.49	-0.128418	17.5682	0
High	sGHFDVTTVASIK	1	1	1	Q8TDM6	S1(Phospho)	0	S(1): 100.0; T(7): 0.0; T(8): 0.0; S(11): 0.0	2.96667e+06	0.001	0.007935	15.03	0.761573	2	1441.68	3.43447	19.989	0
High	VGPcSsPPAAR	1	1	1	Q8TDM6	C4(Carbamidomethyl); S6(Phospho)	0	S(5): 0.8; S(6): 99.2	7.57993e+06	0	0.0009339	25.31	0.0524107	2	1178.5	-0.274506	10.9257	0
High	KLsLSEGK	1	1	1	Q49A26	S3(Phospho)	0	S(3): 100.0; S(5): 0.0	1.01358e+07	0	0.002685	55.02	4.23372e-05	2	941.47	-0.192138	8.18418	1
High	sPEAVGPELEAEEK	1	1	1	Q96N64	S1(Phospho)	0	S(1): 100.0	5359720	0	6.223e-10	54.97	6.57537e-05	2	1564.68	-0.0832927	18.7775	0
High	VNsGDTEVGSSLLR	1	1	1	O75592	S3(Phospho)	0	S(3): 100.0; T(6): 0.0; S(10): 0.0; S(11): 0.0	3.8177e+06	0	3.606e-08	54.92	7.58562e-05	2	1513.69	1.23505	21.3417	0
High	SSSStPTSPKPLLQSPK	4	1	1	Q5VZK9	T5(Phospho)	0	S(1): 0.4; S(2): 0.4; S(3): 0.4; S(4): 24.7; T(5): 24.7; T(7): 24.7; S(8): 24.7; S(15): 0.0	0	0	0.002195	17.75	0.390322	2	1821.9	2.28319	14.2619	1
High	DGQSsPQPSPR	1	1	1	Q5VZK9	S5(Phospho)	0	S(4): 0.9; S(5): 99.1; S(9): 0.0	3.63251e+06	0	5.724e-05	45.13	0.000480302	2	1235.51	1.89692	7.535	0
High	SNDsGEEAEKEFIFV	1	1	1	Q5VZK9	S4(Phospho)	0	S(1): 1.1; S(4): 98.9	1.38706e+07	0.005	0.06228	19.34	0.229333	2	1780.73	-0.223318	30.8243	1
High	RSsGFISELPSEEGK	1	1	1	Q5VZK9	S3(Phospho)	0	S(2): 1.3; S(3): 98.7; S(7): 0.0; S(11): 0.0	1.10454e+07	0	0.0003565	19.99	0.267114	2	1702.77	1.3068	18.503	1
High	sSGFISELPSEEGK	2	1	1	Q5VZK9	S1(Phospho)	0	S(1): 50.0; S(2): 50.0; S(6): 0.0; S(10): 0.0	2.48726e+06	0	0.000221	34.26	0.00817441	2	1546.67	1.78399	23.7094	0
High	LEDLDTcMMtPK	1	1	1	Q5VZK9	C7(Carbamidomethyl); T10(Phospho)	0	T(6): 0.0; T(10): 100.0	3.40533e+06	0	0.001766	10.09	1.47903	2	1533.6	0.157188	22.6312	0
High	GTPSQsPVVGR	1	1	1	P52594	S6(Phospho)	0	T(2): 0.0; S(4): 0.0; S(6): 100.0	1.47195e+07	0	5.285e-06	54.65	6.23837e-05	2	1164.54	-0.516511	10.447	0
High	IADPEHDHTGFLTEyVATR	1	1	1	P27361	Y15(Phospho)	0	T(9): 0.0; T(13): 0.0; Y(15): 100.0; T(18): 0.0	2.52195e+07	0	1.214e-12	54.6	0.000110609	3	2252.01	1.38934	19.5285	0
High	IADPEHDHTGFLtEyVATR	1	1	1	P27361	T13(Phospho); Y15(Phospho)	0	T(9): 0.0; T(13): 100.0; Y(15): 99.9; T(18): 0.1	5.0117e+06	0	0.001327	16.43	0.643853	3	2331.97	0.494549	22.4775	0
High	HGAPAAPsPPPR	1	1	1	Q4KMP7	S8(Phospho)	0	S(8): 100.0	2.66311e+06	0	0.0003997	30.96	0.0152319	2	1234.57	-3.15493	8.54017	0
High	AAGGAPsPPPPVR	1	1	1	Q4KMP7	S7(Phospho)	0	S(7): 100.0	2.04651e+07	0	1.076e-06	25.32	0.0784352	2	1253.6	0.321749	14.5314	0
High	RAsAGPAPGPVVTAEGLHPSLPSPTGNSTPLGSSK	1	1	1	Q4KMP7	S3(Phospho)	0	S(3): 100.0; T(13): 0.0; S(20): 0.0; S(23): 0.0; T(25): 0.0; S(28): 0.0; T(29): 0.0; S(33): 0.0; S(34): 0.0	0	0	4.549e-09	41.32	0.00181524	4	3374.67	-0.933746	23.3135	1
High	AALLAQYADVtDEEDEADEKDDSGATTmNIGSDK	1	1	1	Q96MW1	T11(Phospho); M28(Oxidation)	0	Y(7): 2.1; T(11): 91.8; S(23): 2.1; T(26): 2.1; T(27): 2.1; S(32): 0.0	2.52354e+07	0	6.27e-06	23.73	0.156748	3	3684.53	2.02945	23.8639	1
High	AALLAQYADVtDEEDEADEKDDSGATTMNIGSDK	1	1	1	Q96MW1	T11(Phospho)	0	Y(7): 0.0; T(11): 100.0; S(23): 0.0; T(26): 0.0; T(27): 0.0; S(32): 0.0	3.78341e+07	0	9.765e-10	46.95	0.000850741	3	3668.55	4.71171	25.7174	1
High	KVEEEGsPGDPDHEASTQGR	1	1	1	Q9NZT2	S7(Phospho)	0	S(7): 100.0; S(16): 0.0; T(17): 0.0	2.52458e+07	0	2.399e-09	56.26	5.85565e-05	3	2204.91	1.26998	7.06268	1
High	PAGPAGDEPAEsPSETPGPR	1	1	1	Q9NZT2	S12(Phospho)	0	S(12): 100.0; S(14): 0.0; T(16): 0.0	4.25994e+06	0	7.356e-06	22.99	0.135884	3	1998.85	0.966152	14.7403	0
High	PAGPAGDEPAEsPSETPGPSPAGPTR	1	1	1	Q9NZT2	S12(Phospho)	0	S(12): 100.0; S(14): 0.0; T(16): 0.0; S(20): 0.0; T(25): 0.0	2.99516e+06	0	4.557e-05	19.9	0.363781	2	2509.09	0.165082	17.402	0
High	HGsVSADEAAR	1	1	1	Q9NWW5	S3(Phospho)	0	S(3): 100.0; S(5): 0.0	6.96849e+06	0	3.832e-06	54.15	5.24968e-05	2	1179.48	1.0258	5.8358	0
High	MsGFIYQGK	1	2	1	Q15052	S2(Phospho)	0	S(2): 100.0; Y(6): 0.0	8.59431e+06	0	0.001055	38.92	0.00159009	2	1110.47	0.58515	20.0144	0
High	msGFIYQGK	1	2	1	Q15052	M1(Oxidation); S2(Phospho)	0	S(2): 100.0; Y(6): 0.0	5.9556e+06	0	0.0009581	38.91	0.00161946	2	1126.46	-2.06119	16.7983	0
High	LNQPGtPTR	1	1	1	P36507	T6(Phospho)	0	T(6): 50.0; T(8): 50.0	9.473e+07	0.002	0.02412	36.47	0.00404636	2	1063.49	-0.94707	8.32516	0
High	ELEAIFGRPVVDGEEGEPHsISPR	2	1	1	P36507	S20(Phospho)	0	S(20): 50.0; S(22): 50.0	3.48788e+07	0	0.0006439	16.27	0.786039	3	2700.27	2.00926	23.4229	1
High	PVVDGEEGEPHSIsPR	1	1	1	P36507	S14(Phospho)	0	S(12): 0.0; S(14): 100.0	5.55041e+06	0	6.734e-05	35.16	0.00786357	2	1784.79	1.72755	13.5654	0
High	LcDFGVSGQLIDSmANsFVGTR	1	2	1	P36507	C2(Carbamidomethyl); M14(Oxidation); S17(Phospho)	0	S(7): 0.0; S(13): 0.0; S(17): 100.0; T(21): 0.0	9.9394e+06	0	6.448e-05	22.33	0.202045	3	2470.08	-0.0187396	30.6244	0
High	TADGRVsPAGGTLDDKPK	1	1	1	Q8WY36	S7(Phospho)	0	T(1): 0.0; S(7): 100.0; T(12): 0.0	1.12372e+07	0	6.527e-16	53.36	0.000133321	3	1864.88	0.659296	8.93158	2
High	sNSEVEDVGPTSHNR	2	1	1	Q13206	S1(Phospho)	0	S(1): 50.0; S(3): 50.0; T(11): 0.0; S(12): 0.0	4.59258e+06	0	6.92e-08	53.15	9.97395e-05	2	1707.7	2.86326	9.50258	0
High	GDPPRLsPDPVAGSAVSQELR	1	1	1	Q9BUR4	S7(Phospho)	0	S(7): 100.0; S(14): 0.0; S(17): 0.0	2.47279e+07	0	1.614e-09	53.07	0.000162994	3	2228.07	0.44397	22.4955	1
High	EGDPVSLSTPLETEFGSPsELSPR	2	1	1	Q9BUR4	S19(Phospho)	0	S(6): 0.0; S(8): 0.0; T(9): 0.0; T(13): 0.0; S(17): 0.0; S(19): 50.0; S(22): 50.0	1.33883e+07	0	0.001173	12.43	1.9316	3	2611.18	0.897894	33.0611	0
High	asGVTVNDEVIK	1	1	1	Q9Y281	N-Term(Acetyl); S2(Phospho)	0	S(2): 100.0; T(5): 0.0	2.72527e+06	0	0.0004472	21.75	0.149375	2	1353.63	-0.00661855	27.2927	0
High	sVSGFLHFDTATK	2	1	1	Q92621	S1(Phospho)	0	S(1): 100.0; S(3): 0.0; T(10): 0.0; T(12): 0.0	4.83657e+06	0	1.523e-05	52.47	0.000128536	2	1489.68	3.73352	23.742	0
High	MSQPGsPSPK	1	1	1	Q14839	S6(Phospho)	0	S(2): 0.0; S(6): 100.0; S(8): 0.0	2.58434e+07	0.001	0.003682	37.21	0.00223377	2	1095.46	1.05481	7.88381	0
High	WGQPPsPTPVPRPPDADPNTPSPK	1	1	1	Q14839	S6(Phospho)	0	S(6): 97.1; T(8): 2.9; T(20): 0.0; S(22): 0.0	2.4417e+07	0	8.804e-05	12.28	2.04976	3	2615.23	1.60147	20.9287	1
High	mSQPGsPSPK	1	1	1	Q14839	M1(Oxidation); S6(Phospho)	0	S(2): 0.0; S(6): 100.0; S(8): 0.0	1.22369e+07	0	0.001155	39.03	0.00158158	2	1111.45	0.892051	6.20069	0
High	SMsENAVR	1	1	1	Q9GZY8	S3(Phospho)	0	S(1): 0.0; S(3): 100.0	1.02883e+07	0	0.002142	52.3	4.5341e-05	2	973.381	0.235072	8.55593	0
High	MPQDGsDDEDEEWPTLEK	1	1	1	Q13895	S6(Phospho)	0	S(6): 100.0; T(15): 0.0	4.47044e+07	0	3.629e-08	52.24	0.000101197	2	2200.82	-0.696798	25.2598	0
High	mPQDGsDDEDEEWPTLEK	1	1	1	Q13895	M1(Oxidation); S6(Phospho)	0	S(6): 100.0; T(15): 0.0	2.26748e+07	0	0.0006596	18.16	0.230662	2	2216.82	1.0514	23.9082	0
High	IAASSsFR	1	1	1	Q99961	S6(Phospho)	0	S(4): 0.0; S(5): 0.8; S(6): 99.2	4.06185e+07	0	0.000767	52.17	6.6741e-05	2	918.409	0.483009	11.5798	0
High	AITSLLGGGsPK	1	1	1	Q6KC79	S10(Phospho)	0	T(3): 0.0; S(4): 0.0; S(10): 100.0	2.55529e+07	0	1.025e-05	52.16	0.000139871	2	1180.6	0.677479	22.9158	0
High	DVPPDILLDsPER	1	1	1	Q6KC79	S10(Phospho)	0	S(10): 100.0	5.42614e+06	0.002	0.03148	12.19	1.52195	2	1545.72	0.513859	29.3418	0
High	EERsPQTLAPVGEDAMK	2	1	1	Q92797	S4(Phospho)	0	S(4): 50.0; T(7): 50.0	3.63817e+06	0	0.0001593	12.33	1.67835	3	1937.87	0.118	17.1074	1
High	TPsPAAEDAREPEAK	1	1	1	Q92797	S3(Phospho)	0	T(1): 0.0; S(3): 100.0	9.56306e+06	0	1.665e-07	50.3	0.00019225	2	1648.72	1.09291	8.72598	1
High	RLsAQGQAISVVGSLSSMSPLEEEAPQAK	1	1	1	Q92797	S3(Phospho)	0	S(3): 100.0; S(10): 0.0; S(14): 0.0; S(16): 0.0; S(17): 0.0; S(19): 0.0	7.63761e+06	0	0.0001619	16.39	0.672772	3	3050.49	1.91525	29.0456	1
High	LKPGGVGAPSSSsPSPSPSAR	5	1	1	Q92797	S13(Phospho)	0	S(10): 0.0; S(11): 0.0; S(12): 0.0; S(13): 100.0; S(15): 0.0; S(17): 0.0; S(19): 0.0	4.47398e+06	0	9.167e-05	25.3	0.0798302	3	2002.98	8.46303	12.0095	1
High	sPQTLAPVGEDAmK	1	1	1	Q92797	S1(Phospho); M13(Oxidation)	0	S(1): 100.0; T(4): 0.0	3.76859e+06	0.001	0.01514	19.66	0.251433	2	1539.68	2.8917	17.0886	0
High	sPQTLAPVGEDAMK	1	1	1	Q92797	S1(Phospho)	0	S(1): 100.0; T(4): 0.0	2.3472e+06	0.001	0.005144	21.39	0.1474	2	1523.68	2.30867	20.6925	0
High	RDSsEsQLASTESDKPTTGR	2	1	1	Q96B23	S4(Phospho); S6(Phospho)	0	S(3): 50.4; S(4): 50.4; S(6): 99.1; S(10): 0.0; T(11): 0.0; S(13): 0.0; T(17): 0.0; T(18): 0.0	4.47707e+06	0	0.001653	15.05	0.820596	3	2311.94	-0.400074	10.8462	2
High	SRsESETSTMAAK	1	1	1	Q96B23	S3(Phospho)	0	S(1): 1.0; S(3): 98.9; S(5): 0.0; T(7): 0.0; S(8): 0.0; T(9): 0.0	4.4776e+06	0.001	0.007535	16.27	0.473276	2	1464.61	1.50229	6.10192	1
High	RDsSESQLASTESDKPTTGR	1	1	1	Q96B23	S3(Phospho)	0	S(3): 100.0; S(4): 0.0; S(6): 0.0; S(10): 0.0; T(11): 0.0; S(13): 0.0; T(17): 0.0; T(18): 0.0	1.07997e+07	0	1.777e-12	53.07	0.000172364	3	2231.98	1.53718	8.55421	2
High	VEAKEEsEEsDEDmGFGLFD	1	2	1	P05388	S7(Phospho); S10(Phospho); M14(Oxidation)	0	S(7): 100.0; S(10): 100.0	2.25539e+08	0	9.351e-08	52.04	8.50235e-05	2	2438.86	2.53926	36.7921	1
High	VEAKEEsEEsDEDMGFGLFD	1	2	1	P05388	S7(Phospho); S10(Phospho)	0	S(7): 100.0; S(10): 100.0	3.12182e+08	0.001	0.006885	17.2	0.244852	2	2422.86	1.46492	41.0196	1
High	EIQNGNLHESDsESVPR	3	1	1	Q86UP2	S12(Phospho)	0.0385	S(10): 0.9; S(12): 98.1; S(14): 0.9	6.2433e+06	0	8.289e-06	50.04	0.000278424	2	1990.86	4.52982	12.8303	0
High	NTSLPPLWsPEAER	1	1	1	P49790	S9(Phospho)	0	T(2): 0.0; S(3): 0.0; S(9): 100.0	1.07937e+07	0.001	0.005358	23.68	0.122565	2	1676.77	0.983211	27.6886	0
High	IPSIVsSPLNSPLDR	2	1	1	P49790	S6(Phospho)	0	S(3): 0.0; S(6): 50.0; S(7): 50.0; S(11): 0.0	3.71914e+06	0	6.658e-06	27.92	0.0364845	2	1674.85	-0.475099	28.3865	0
High	AsDKDITVSK	1	1	1	P49790	S2(Phospho)	0	S(2): 100.0; T(7): 0.0; S(9): 0.0	8.94661e+06	0	0.0009302	50.2	0.000163304	2	1143.53	-0.549333	6.99394	1
High	DFQEYVEPGEDFPAsPQR	2	1	1	Q9Y6G9	S15(Phospho)	0	Y(5): 0.0; S(15): 100.0	46705315	0	0.0001358	22.21	0.152097	2	2190.9	-0.893011	28.152	0
High	DFQEYVEPGEDFPAsPQRR	1	1	1	Q9Y6G9	S15(Phospho)	0	Y(5): 0.0; S(15): 100.0	3.49057e+07	0	1.026e-05	24.72	0.112823	3	2347.01	1.89774	23.8512	1
High	KPVTVSPTTPTsPTEGEAS	3	1	1	Q9Y6G9	S12(Phospho)	0	T(4): 0.0; S(6): 0.0; T(8): 0.0; T(9): 0.0; T(11): 0.4; S(12): 33.2; T(14): 33.2; S(19): 33.2	1.96779e+07	0	1.07e-08	51.85	0.000200185	2	1965.91	2.34874	16.2972	1
High	QQGHEPVsPR	1	1	1	Q9BTA9	S8(Phospho)	0	S(8): 100.0	1.10339e+07	0	0.001277	51.4	0.000139816	2	1214.53	1.60596	5.98506	0
High	sTGGDFGNPLR	2	1	1	P20340	N-Term(Acetyl); S1(Phospho)	0	S(1): 50.0; T(2): 50.0	1.12724e+06	0	0.001509	16.93	0.301111	2	1242.52	1.03638	28.1442	0
High	LDPFADGGKtPDPK	1	1	1	O75533	T10(Phospho)	0	T(10): 100.0	5.08403e+06	0.002	0.02362	19.27	0.262635	2	1537.7	6.13003	16.0438	1
High	TMIIsPER	1	1	1	O75533	S5(Phospho)	0	T(1): 0.0; S(5): 100.0	1.88912e+06	0.001	0.00745	28	0.0271017	2	1026.47	0.861137	18.1049	0
High	AtSPLVSLYPALEcR	2	1	1	Q96G74	T2(Phospho); C14(Carbamidomethyl)	0	T(2): 50.0; S(3): 50.0; S(7): 0.0; Y(9): 0.0	1.7631e+07	0	8.256e-09	51.26	0.000200884	2	1756.84	5.84547	30.4923	0
High	AsPPPQGPLPGPPGALHR	1	1	1	Q96G74	S2(Phospho)	0	S(2): 100.0	1.23709e+07	0	0.0002247	19.22	0.266275	2	1825.92	2.64349	18.9355	0
High	EDKSPSEEsAPTTSPESVSGSVPSSGSSGR	1	1	1	P54725	S9(Phospho)	0	S(4): 50.0; S(6): 50.0; S(9): 0.0; T(12): 0.0; T(13): 0.0; S(14): 0.0; S(17): 0.0; S(19): 0.0; S(21): 0.0; S(24): 0.0; S(25): 0.0; S(27): 0.0; S(28): 0.0	2.3211e+07	0	1.492e-12	51.25	0.000260213	3	3002.28	1.87069	14.867	1
High	GVEPSPsPIKPGDIK	1	1	1	Q92890	S7(Phospho)	0	S(5): 0.0; S(7): 100.0	1.55887e+07	0	4.299e-06	51.25	0.000148479	2	1600.8	3.86597	16.477	1
High	AVAGVMITAsHNR	2	1	1	Q6PCE3	S10(Phospho)	0	T(8): 0.0; S(10): 100.0	1.18537e+07	0	6.931e-05	47.49	0.000368952	2	1406.66	1.80535	13.4347	0
High	AVAGVmITAsHNR	1	1	1	Q6PCE3	M6(Oxidation); S10(Phospho)	0	T(8): 0.0; S(10): 100.0	6.38763e+06	0	0.0004501	25.77	0.0537646	2	1422.66	0.811714	11.7444	0
High	VPsVESLFR	1	1	1	Q13439	S3(Phospho)	0	S(3): 100.0; S(6): 0.0	3.59633e+06	0	3.37e-05	51.05	0.00013192	2	1113.54	0.924514	28.283	0
High	GKDSLsDDGVDLK	1	1	1	P07948	S6(Phospho)	0	S(4): 0.0; S(6): 100.0	1.09636e+07	0	1.375e-07	51.04	0.000188104	2	1428.63	1.24075	14.3944	1
High	QEQINTEPLEDTVLSPtK	2	1	1	O15446	T17(Phospho)	0.0196	T(6): 0.0; T(12): 0.0; S(15): 1.3; T(17): 98.7	1.39091e+07	0	5.125e-07	49.7	0.000330028	2	2122	2.38899	25.5448	0
High	EGsPANWK	1	1	1	O96019	S3(Phospho)	0	S(3): 100.0	5.84883e+06	0.001	0.007722	51	5.44115e-05	2	968.386	-1.01423	10.8577	0
High	StSATDTHHVEMAR	5	1	1	O14874	T2(Phospho)	0	S(1): 50.0; T(2): 50.0; S(3): 0.0; T(5): 0.0; T(7): 0.0	9.66236e+06	0	1.408e-07	46.62	0.000375655	3	1622.66	0.874175	7.19708	0
High	sTSATDTHHVEmAR	2	1	1	O14874	S1(Phospho); M12(Oxidation)	0	S(1): 50.0; T(2): 50.0; S(3): 0.0; T(5): 0.0; T(7): 0.0	4.92459e+06	0	1.202e-06	28.04	0.023948	3	1638.66	0.579311	5.97115	0
High	VAAETQsPSLFGSTK	1	1	1	Q9UKX7	S7(Phospho)	0	T(5): 0.0; S(7): 100.0; S(9): 0.0; S(13): 0.0; T(14): 0.0	7.54505e+06	0	5.69e-07	50.97	0.000209956	2	1602.74	1.88796	19.8387	0
High	QITTsPITVR	1	1	1	O95835	S5(Phospho)	0	T(3): 0.0; T(4): 0.0; S(5): 98.6; T(8): 1.3	1.64713e+06	0.003	0.03402	25.28	0.0545529	2	1195.61	-0.67148	18.4076	0
High	SNsFNNPLGNR	1	1	1	O95835	S3(Phospho)	0	S(1): 0.0; S(3): 100.0	2.79009e+06	0	3.208e-06	50.96	0.000121855	2	1299.55	1.20173	17.8731	0
High	sPSSDSWTcADTSTER	2	1	1	Q8N6T3	S1(Phospho); C9(Carbamidomethyl)	0	S(1): 50.0; S(3): 50.0; S(4): 0.0; S(6): 0.0; T(8): 0.0; T(12): 0.0; S(13): 0.0; T(14): 0.0	2.65616e+06	0	3.293e-07	50.87	9.41235e-05	2	1866.68	-0.383927	16.1307	0
High	AFLAELEQNsPK	1	1	1	Q9UPN3	S10(Phospho)	0	S(10): 100.0	5.31288e+06	0	1.949e-08	50.79	0.00023093	2	1426.66	0.836186	23.7929	0
High	YLLGDAPVsPSSQK	1	1	1	Q9NYB0	S9(Phospho)	0	Y(1): 0.0; S(9): 99.3; S(11): 0.7; S(12): 0.0	3.6151e+07	0	1.088e-08	50.67	0.000212117	2	1541.73	1.03368	21.8388	0
High	sLQHQEQLEDSK	1	1	1	Q9BSJ6	S1(Phospho)	0	S(1): 100.0; S(11): 0.0	2.58729e+06	0	2.569e-06	50.59	0.000177213	2	1521.66	3.84167	8.53503	0
High	KPEDVLDDDDAGsAPLK	2	1	1	P35613	S13(Phospho)	0	S(13): 100.0	1.15897e+07	0	4.829e-07	48.41	0.000447056	2	1864.82	-0.374331	18.2892	1
High	LGDSsLSR	1	1	1	Q14152	S5(Phospho)	0	S(4): 0.8; S(5): 99.2; S(7): 0.0	7.0816e+06	0	0.0004913	50.47	0.000104999	2	914.398	0.326617	10.3643	0
High	DIDHETVVEEQIIGENsPPDYSEYMTGK	1	1	1	P25490	S17(Phospho)	0	T(6): 0.0; S(17): 100.0; Y(21): 0.0; S(22): 0.0; Y(24): 0.0; T(26): 0.0	2.18296e+07	0	4.092e-10	50.44	0.000360104	3	3275.4	0.463659	29.3569	0
High	AAsLNYLNQPSAAPLQVSR	1	1	1	Q9NSK0	S3(Phospho)	0	S(3): 100.0; Y(6): 0.0; S(11): 0.0; S(18): 0.0	5.62281e+06	0	4.636e-08	50.41	0.000250226	2	2080.02	-2.39936	26.4361	0
High	QRPDLGsAQK	1	1	1	P33991	S7(Phospho)	0	S(7): 100.0	7.37577e+06	0	0.001496	50.38	0.000161255	2	1179.55	0.494648	6.46588	1
High	sSPASTPSR	2	1	1	P33991	N-Term(Acetyl); S1(Phospho)	0	S(1): 98.7; S(2): 1.3; S(5): 0.0; T(6): 0.0; S(8): 0.0	1.88797e+07	0.008	0.09099	15.27	0.248134	2	1011.42	0.760678	10.8374	0
High	sLPGPAPcLK	1	1	1	Q01433	S1(Phospho); C8(Carbamidomethyl)	0	S(1): 100.0	2.41526e+06	0	0.0003017	40.15	0.00192244	2	1119.53	0.032842	20.1673	0
High	sLEsVLSLGPRPTGGGSSPPEIR	1	1	1	Q13470	S1(Phospho); S4(Phospho)	0	S(1): 100.0; S(4): 0.0; S(7): 25.0; T(13): 25.0; S(17): 25.0; S(18): 25.0	5.59282e+06	0.001	0.01035	13.89	1.27191	3	2453.15	-0.447539	30.2404	1
High	sLESVLSLGPR	1	1	1	Q13470	S1(Phospho)	0	S(1): 100.0; S(4): 0.0; S(7): 0.0	9.79811e+06	0	4.069e-05	50.12	0.00018774	2	1237.62	-0.320372	28.6641	0
High	TEELIEsPKLESSEGEIIQTVDR	3	1	1	Q99590	S7(Phospho)	0	T(1): 0.0; S(7): 33.3; S(12): 33.3; S(13): 33.3; T(20): 0.0	1.96724e+07	0	9.102e-06	46.78	0.000727283	3	2682.27	-3.86847	26.3166	1
High	FHsPStTWSPNKDTPQEK	4	1	1	Q99590	S3(Phospho); T6(Phospho)	0	S(3): 100.0; S(5): 25.0; T(6): 25.0; T(7): 25.0; S(9): 25.0; T(14): 0.0	1.14997e+07	0	0.0001607	25.29	0.077352	3	2246.92	0.719272	13.9022	1
High	DISEGGESPVVQsDEEEVQVDTALATSHTDR	3	1	1	Q96EV8	S13(Phospho)	0	S(3): 2.0; S(8): 0.0; S(13): 97.9; T(22): 0.0; T(26): 0.0; S(27): 0.0; T(29): 0.0	1.29887e+07	0	2.314e-07	49.77	0.00045075	3	3380.47	2.55458	25.4223	0
High	YLsFTPPEK	1	1	1	Q13177	S3(Phospho)	0	Y(1): 0.0; S(3): 100.0; T(5): 0.0	2.73833e+07	0	0.0001308	49.79	0.000208859	2	1161.52	0.272563	22.945	0
High	ILKsPEIQR	1	1	1	P36578	S4(Phospho)	0	S(4): 100.0	1.16769e+07	0	0.001026	41	0.0013583	2	1163.62	0.00300947	11.0265	1
High	AAHVPENsDtEQDVLTVKPVR	1	1	1	Q9H2Y7	S8(Phospho); T10(Phospho)	0	S(8): 100.0; T(10): 100.0; T(16): 0.1	4.45825e+06	0	0.0006058	14.48	1.3153	3	2465.13	6.37283	18.7553	1
High	EPHsPADQPEQQAESTLTSAETR	1	1	1	Q9H2Y7	S4(Phospho)	0	S(4): 100.0; S(15): 0.0; T(16): 0.0; T(18): 0.0; S(19): 0.0; T(22): 0.0	5.48854e+06	0	4.259e-07	33.68	0.0160491	3	2589.11	-0.338038	17.6658	0
High	SLsESSVImDR	1	1	1	Q9H2Y7	S3(Phospho); M9(Oxidation)	0	S(1): 0.0; S(3): 100.0; S(5): 0.0; S(6): 0.0	2.33028e+06	0	2.549e-05	38.96	0.00245856	2	1319.56	0.956869	17.8766	0
High	DSQDASAEQsDHDDEVASLASASGGFGTK	1	1	1	Q6P2E9	S10(Phospho)	0	S(2): 2.0; S(6): 97.9; S(10): 0.0; S(18): 0.0; S(21): 0.0; S(23): 0.0; T(28): 0.0	6.52772e+07	0	1.087e-09	49.68	0.000320248	3	2962.19	-0.183776	23.4564	0
High	GPPsPPAPVMHsPSR	1	1	1	Q13573	S4(Phospho); S12(Phospho)	0	S(4): 100.0; S(12): 50.0; S(14): 50.0	1.06015e+07	0	0.0007965	16.32	0.446857	3	1673.69	-0.0270776	17.5699	0
High	GPPsPPAPVMHSPSR	2	1	1	Q13573	S4(Phospho)	0	S(4): 100.0; S(12): 0.0; S(14): 0.0	1.44815e+07	0	1.276e-07	46.82	0.000497048	3	1593.73	0.406892	14.8254	0
High	tSPPcsPANLSR	2	1	1	P49585	T1(Phospho); C5(Carbamidomethyl); S6(Phospho)	0	T(1): 50.0; S(2): 50.0; S(6): 100.0; S(11): 0.0	8.63279e+06	0.002	0.02658	13.09	0.620998	2	1446.55	0.444205	17.6299	0
High	MLQAIsPK	1	2	1	P49585	S6(Phospho)	0	S(6): 100.0	9.63427e+06	0.001	0.0037	44.52	0.000727557	2	967.468	-0.350599	15.9676	0
High	mLQAIsPK	1	2	1	P49585	M1(Oxidation); S6(Phospho)	0	S(6): 100.0	5.14855e+06	0.008	0.09196	30.62	0.0139147	2	983.466	2.52933	13.0559	0
High	SAtFPNAGPR	1	1	1	Q86X27	T3(Phospho)	0	S(1): 0.0; T(3): 100.0	2.57174e+06	0	2.659e-05	49.34	0.00016356	2	1097.48	-2.12759	14.035	0
High	VDDDsLGEFPVTNSR	1	1	1	Q92785	S5(Phospho)	0	S(5): 100.0; T(12): 0.0; S(14): 0.0	1.32381e+07	0	4.66e-08	49.33	0.000244447	2	1730.73	0.278664	24.0541	0
High	AAALQALQAQAPtSPPPPPPPLK	2	1	1	Q8NAF0	T13(Phospho)	0	T(13): 50.0; S(14): 50.0	1.28245e+07	0	1.345e-12	49.24	0.000171539	3	2341.23	0.25227	27.3081	0
High	RDsLTGSSDLYK	1	1	1	Q14671	S3(Phospho)	0	S(3): 100.0; T(5): 0.0; S(7): 0.0; S(8): 0.0; Y(11): 0.0	1.59507e+07	0	0.0004552	33.06	0.0102569	2	1421.63	1.66288	13.0691	1
High	RPGQSFHVNSEVNSVLsPR	1	1	1	Q14671	S17(Phospho)	0	S(5): 0.0; S(10): 0.0; S(14): 0.0; S(17): 100.0	1.11004e+07	0	1.488e-05	40.24	0.00289075	3	2190.04	-0.35367	17.0629	1
High	MLPHAPGVQMQAIPEDAVHEDsGDEDGEDPDKR	3	1	1	Q92769	S22(Phospho)	0	S(22): 100.0	1.85389e+08	0	2.167e-11	28.53	0.0604613	4	3665.56	1.7826	20.1338	1
High	MLPHAPGVQmQAIPEDAVHEDsGDEDGEDPDKR	4	1	1	Q92769	M10(Oxidation); S22(Phospho)	0	S(22): 100.0	8.73207e+07	0	9.766e-09	15.65	1.12584	4	3681.55	1.29926	17.5351	1
High	mLPHAPGVQmQAIPEDAVHEDsGDEDGEDPDKR	2	1	1	Q92769	M1(Oxidation); M10(Oxidation); S22(Phospho)	0	S(22): 100.0	7.62957e+07	0	1.442e-07	19.5	0.416269	4	3697.55	1.48038	16.7874	1
High	RPDHSGGsPSPPTSEPAR	2	1	1	Q8TAD8	S8(Phospho)	0	S(5): 1.2; S(8): 98.8; S(10): 0.0; T(13): 0.0; S(14): 0.0	1.7588e+07	0	2.037e-06	31.35	0.0213985	3	1911.84	0.662861	6.84814	1
High	RPDHsGGSPsPPTSEPAR	2	1	1	Q8TAD8	S5(Phospho); S10(Phospho)	0	S(5): 66.7; S(8): 66.7; S(10): 66.7; T(13): 0.0; S(14): 0.0	7.90028e+06	0	8.587e-05	25.67	0.0626054	3	1991.8	0.563713	8.08725	1
High	QERLsPEVAPPAHR	1	1	1	Q8TAD8	S5(Phospho)	0	S(5): 100.0	1.59197e+07	0	6.364e-08	36.54	0.00555658	3	1666.81	0.081753	11.2438	1
High	LsPEVAPPAHR	1	1	1	Q8TAD8	S2(Phospho)	0	S(2): 100.0	1.29274e+07	0	0.001029	35.48	0.00757397	2	1253.6	0.435078	12.7397	0
High	RsLTNSHLEK	1	1	1	Q9H2H9	S2(Phospho)	0	S(2): 100.0; T(4): 0.0; S(6): 0.0	1.012e+07	0.001	0.004546	31.97	0.0124207	3	1264.61	0.462523	6.0022	1
High	sLTNSHLEK	1	1	1	Q9H2H9	S1(Phospho)	0	S(1): 100.0; T(3): 0.0; S(5): 0.0	5.44084e+07	0.004	0.05292	42.37	0.000799612	2	1108.51	2.53574	7.54345	0
High	SAsITNLSLDR	1	1	1	Q9Y2I7	S3(Phospho)	0	S(1): 0.0; S(3): 100.0; T(5): 0.0; S(8): 0.0	1.88463e+06	0	5.103e-05	49.09	0.000254636	2	1256.59	0.997014	21.3093	0
High	LGsVDSFER	1	1	1	O60343	S3(Phospho)	0	S(3): 100.0; S(6): 0.0	8.15179e+06	0	0.000458	49.08	0.000153875	2	1089.46	-0.83303	18.4869	0
High	HAsAPSHVQPSDSEK	1	1	1	O60343	S3(Phospho)	0	S(3): 98.2; S(6): 1.7; S(11): 0.0; S(13): 0.0	4.11665e+06	0.001	0.01625	18.39	0.310037	2	1656.7	1.87304	5.99366	0
High	NTETSKsPEKDVPmVEK	2	1	1	O14617	S7(Phospho); M14(Oxidation)	0	T(2): 0.4; T(4): 33.2; S(5): 33.2; S(7): 33.2	1.56329e+07	0	6.387e-05	26.72	0.0621417	3	2014.9	0.145264	9.33363	2
High	NTETsKSPEKDVPMVEK	7	1	1	O14617	S5(Phospho)	0	T(2): 0.0; T(4): 0.5; S(5): 49.7; S(7): 49.7	5.31945e+07	0	4.834e-08	43.11	0.00153437	3	1998.91	0.381153	11.2781	2
High	SNsTTQVSQPR	1	1	1	Q9UPN4	S3(Phospho)	0	S(1): 0.0; S(3): 100.0; T(4): 0.0; T(5): 0.0; S(8): 0.0	3.43018e+06	0	0.000141	48.95	0.000205671	2	1284.56	1.90735	7.73597	0
High	SGsPRPTEPTDFLMLFEGSPSGK	4	1	1	Q9UPN4	S3(Phospho)	0	S(1): 25.0; S(3): 25.0; T(7): 25.0; T(10): 25.0; S(19): 0.0; S(21): 0.0	2.16046e+06	0.001	0.005934	12.58	1.993	3	2517.13	-1.78931	33.0051	1
High	LENVSQLSLDKsPTEK	1	1	1	Q86W56	S12(Phospho)	0	S(5): 0.0; S(8): 0.0; S(12): 50.0; T(14): 50.0	5.00136e+06	0	2.008e-06	48.79	0.000389782	2	1867.91	1.18303	17.1553	1
High	VGDSQNPLLsDGDLSTMIGK	1	1	1	Q00403	S10(Phospho)	0	S(4): 0.0; S(10): 97.7; S(15): 1.1; T(16): 1.1	6.06006e+06	0	8.217e-08	48.62	0.00045893	2	2126.97	-0.724153	31.6453	0
High	SQQQPTPVtPK	1	1	1	O95251	T9(Phospho)	0	S(1): 0.0; T(6): 0.0; T(9): 100.0	9.04517e+06	0.001	0.01579	12.92	1.00314	2	1290.61	1.83899	9.97402	0
High	LSQSSQDSsPVR	2	1	1	O95251	S9(Phospho)	0	S(2): 0.0; S(4): 0.0; S(5): 0.0; S(8): 0.0; S(9): 100.0	1.34714e+07	0	0.0001092	48.58	0.000223961	2	1370.6	1.57532	7.84334	0
High	AQsSPAAPASLSAPEPASQAR	2	1	1	Q8WUI4	S3(Phospho)	0	S(3): 50.0; S(4): 50.0; S(10): 0.0; S(12): 0.0; S(18): 0.0	8.12332e+06	0	2.867e-09	48.53	0.000432067	2	2073.96	1.44172	18.908	0
High	AATTATPAAtTSPK	3	1	1	Q92766	T10(Phospho)	0	T(3): 0.0; T(4): 0.0; T(6): 0.0; T(10): 33.3; T(11): 33.3; S(12): 33.3	5.75488e+06	0.001	0.00698	10.79	1.87995	2	1368.64	1.93319	9.52295	0
High	QVAGDAPVEQATAETAsPVHR	1	1	1	Q92766	S17(Phospho)	0	T(12): 0.0; T(15): 0.0; S(17): 100.0	9.05721e+06	0	4.609e-09	48.44	0.000470474	3	2214.02	1.01984	15.0016	0
High	SIsNEGLTLNNSHVSK	2	1	1	Q08AD1	S3(Phospho)	0	S(1): 0.0; S(3): 100.0; T(8): 0.0; S(12): 0.0; S(15): 0.0	7.83012e+06	0	8.217e-08	48.41	0.000420377	2	1779.83	2.38689	15.0855	0
High	tSPLKDNPsPEPQLDDIKR	5	1	1	Q96JC9	T1(Phospho); S9(Phospho)	0	T(1): 50.0; S(2): 50.0; S(9): 100.0	2.12126e+07	0	1.321e-05	18.03	0.54145	3	2310.04	-0.165128	17.7826	2
High	tSPLKDNPSPEPQLDDIKR	2	1	1	Q96JC9	T1(Phospho)	0	T(1): 50.0; S(2): 50.0; S(9): 0.0	8.45178e+06	0	8.171e-08	48.26	0.000448585	3	2230.08	0.057951	15.978	2
High	aSGEHsPGSGAAR	1	1	1	Q9H4A4	N-Term(Acetyl); S6(Phospho)	0	S(2): 0.0; S(6): 100.0; S(9): 0.0	4.69426e+07	0	6.322e-08	48.22	0.000194352	2	1305.52	0.765607	6.90395	0
High	STSYGYsR	1	1	1	Q13242	S7(Phospho)	0	S(1): 0.0; T(2): 0.0; S(3): 0.0; Y(4): 0.0; Y(6): 99.1; S(7): 0.9	2.01972e+07	0.004	0.05517	25.2	0.0144958	2	1000.38	0.255573	8.71535	0
High	GRDsPYQSR	1	1	1	Q13242	S4(Phospho)	0	S(4): 100.0; Y(6): 0.0; S(8): 0.0	5.64286e+07	0.005	0.0642	14.41	0.490839	2	1145.48	1.48849	2.87658	1
High	GsPHYFsPFRPY	1	1	1	Q13242	S2(Phospho); S7(Phospho)	0	S(2): 100.0; Y(5): 0.0; S(7): 100.0; Y(12): 0.0	2.42712e+07	0	0.001571	30.32	0.0129126	2	1614.62	0.902376	27.9537	1
High	GsPHYFSPFRPY	2	1	1	Q13242	S2(Phospho)	0	S(2): 100.0; Y(5): 0.0; S(7): 0.0; Y(12): 0.0	5.7148e+07	0	0.001207	38.34	0.00324619	2	1534.66	5.41836	22.6482	1
High	DVVLsTSPK	3	1	1	Q9P275	S5(Phospho)	0	S(5): 33.3; T(6): 33.3; S(7): 33.3	2.49166e+06	0	0.002942	18.7	0.264397	2	1025.49	0.228688	17.2529	0
High	AVsPAPQSSSR	1	1	1	Q9P275	S3(Phospho)	0	S(3): 100.0; S(8): 0.0; S(9): 0.0; S(10): 0.0	1.14214e+07	0	0.0001015	48.09	0.000276325	2	1166.52	0.939145	7.19327	0
High	GGGtPDANSLAPPGK	1	1	1	Q9BRQ0	T4(Phospho)	0	T(4): 100.0; S(9): 0.0	8585023	0	7.193e-07	47.8	0.000350173	2	1418.63	0.0288198	15.0327	0
High	SFsmQDLR	1	1	1	Q9H6H4	S3(Phospho); M4(Oxidation)	0	S(1): 0.0; S(3): 100.0	3.55389e+06	0.004	0.05007	22.8	0.0519559	2	1079.42	-0.122546	14.3242	0
High	SFsMQDLR	1	1	1	Q9H6H4	S3(Phospho)	0	S(1): 0.0; S(3): 100.0	8.01027e+06	0	0.001393	47.78	0.000175061	2	1063.43	-0.0849388	20.705	0
High	DFQDYmEPEEGcQGsPQR	1	1	1	O43237	M6(Oxidation); C12(Carbamidomethyl); S15(Phospho)	0	Y(5): 0.0; S(15): 100.0	2.61051e+06	0.001	0.01275	10.72	1.17765	2	2268.82	-0.197045	19.1301	0
High	DFQDYMEPEEGcQGsPQR	1	1	1	O43237	C12(Carbamidomethyl); S15(Phospho)	0	Y(5): 0.0; S(15): 100.0	1.0664e+07	0	3.302e-06	47.74	0.000257449	2	2252.83	2.42107	24.3569	0
High	LVHDsLEDLQMTR	1	1	1	Q9H7F0	S5(Phospho)	0	S(5): 100.0; T(12): 0.0	4.85853e+06	0	3.266e-07	47.73	0.000406459	2	1636.74	1.29086	19.0604	0
High	STsPVTDPSIPIR	3	1	1	Q99607	S3(Phospho)	0	S(1): 0.0; T(2): 0.0; S(3): 99.9; T(6): 0.0; S(9): 0.0	2.69805e+06	0	5.189e-05	47.73	0.000364295	2	1449.7	3.34857	22.3293	0
High	WQRPsSPPPFLPAASEEAEPAEGLR	2	1	1	Q4KMQ1	S5(Phospho)	0	S(5): 50.0; S(6): 50.0; S(15): 0.0	3.89377e+06	0	5.825e-06	47.65	0.000621024	3	2799.32	2.50943	26.1225	1
High	TQLWASEPGtPPLPTSLPSQNPILK	1	1	1	Q9BXP5	T10(Phospho)	0	T(1): 0.0; S(6): 98.5; T(10): 1.5; T(15): 0.0; S(16): 0.0; S(19): 0.0	4.8279e+07	0	1.147e-08	32.54	0.00997362	3	2752.4	3.17281	34.2335	0
High	HELsPPQK	1	1	1	Q9BXP5	S4(Phospho)	0	S(4): 100.0	1.97116e+07	0.002	0.02251	35.99	0.00402828	2	1015.46	1.13288	7.35773	0
High	HELsPPQKR	1	1	1	Q9BXP5	S4(Phospho)	0	S(4): 100.0	3.20595e+07	0.005	0.07015	24.14	0.0655313	3	1171.56	0.592747	5.99992	1
High	YSEEGLsPSK	1	1	1	Q9UIF9	S7(Phospho)	0	Y(1): 0.0; S(2): 0.0; S(7): 99.1; S(9): 0.9	3.11621e+06	0	5.206e-05	47.46	0.000248571	2	1176.48	-0.276458	12.079	0
High	QPSsPSHNTNLR	1	1	1	Q9UIF9	S4(Phospho)	0	S(3): 1.6; S(4): 96.9; S(6): 1.6; T(9): 0.0	2.84425e+06	0	0.00173	25.77	0.0549564	2	1417.62	1.78963	6.32855	0
High	RtSLSAEDAEVTK	3	1	1	Q9P2D1	T2(Phospho)	0	T(2): 49.7; S(3): 49.7; S(5): 0.6; T(12): 0.0	2.38797e+06	0.002	0.02792	11.97	1.49938	2	1486.68	1.28153	11.3234	1
High	NIPsPGQLDPDTR	1	1	1	Q9P2D1	S4(Phospho)	0	S(4): 100.0; T(12): 0.0	6.84686e+06	0	4.843e-06	47.35	0.000382881	2	1489.67	1.01707	22.1303	0
High	ELDQDMVtEDEDDPGSHKR	1	1	1	Q9NRL2	T8(Phospho)	0	T(8): 100.0; S(16): 0.0	6.96187e+06	0	1.266e-06	29.77	0.0247781	3	2295.91	0.80555	12.6024	1
High	RQsPEPSPVTLGR	2	1	1	Q9NRL2	S3(Phospho)	0	S(3): 100.0; S(7): 0.0; T(10): 0.0	6.84128e+06	0	2.378e-05	39.17	0.00328677	3	1503.73	0.588033	13.4302	1
High	YRsPYSGPK	1	1	1	Q14498	S3(Phospho)	0	Y(1): 0.0; S(3): 100.0; Y(5): 0.0; S(6): 0.0	5.23325e+06	0.001	0.005303	23.51	0.0766529	3	1134.5	-0.603553	6.90957	1
High	DKsPVREPIDNLTPEER	4	1	1	Q14498	S3(Phospho)	0	S(3): 100.0; T(13): 0.0	3.94869e+08	0	3.89e-10	37.6	0.00483978	3	2074.98	1.42765	15.9912	2
High	sPVREPIDNLTPEER	1	1	1	Q14498	S1(Phospho)	0	S(1): 100.0; T(11): 0.0	3.33913e+06	0.001	0.0129	13.19	1.28808	2	1831.86	1.67569	17.6162	1
High	AVGMPSPVsPK	2	1	1	Q9UHB7	S9(Phospho)	0	S(6): 1.1; S(9): 98.9	3.42655e+06	0.001	0.01488	19.87	0.18753	2	1149.54	0.707507	18.0578	0
High	ELLsPLSEPDDRYPLIVK	1	1	1	Q9UHB7	S4(Phospho)	0	S(4): 98.1; S(7): 1.8; Y(13): 0.0	2.88103e+06	0.009	0.1034	11.52	1.91324	2	2164.09	-2.15489	29.2377	1
High	YPEsNRTPVKPSSVEEEDSFFR	2	1	1	Q9UHB7	S4(Phospho)	0	Y(1): 33.3; S(4): 33.3; T(7): 33.3; S(12): 0.0; S(13): 0.0; S(19): 0.0	1.54033e+07	0	0.0003286	12.39	2.26669	3	2680.2	1.62092	18.6605	2
High	TIsQSSSLK	1	1	1	Q9UHB7	S3(Phospho)	0	T(1): 0.0; S(3): 98.3; S(5): 1.6; S(6): 0.0; S(7): 0.0	3.91886e+06	0.003	0.04656	12.41	0.729128	2	1030.48	1.49405	10.1232	0
High	SSsPGKPQAVSSLNSSHSR	3	1	1	Q9UHB7	S3(Phospho)	0	S(1): 1.0; S(2): 1.0; S(3): 98.1; S(11): 0.0; S(12): 0.0; S(15): 0.0; S(16): 0.0; S(18): 0.0	1.04307e+07	0	4.354e-13	47.24	0.000578669	3	1992.92	1.16632	7.71852	1
High	YGYLsLPKPMK	1	1	1	Q9UBT7	S5(Phospho)	0	Y(1): 0.0; Y(3): 0.0; S(5): 100.0	1.88525e+06	0	0.0003041	47.22	0.000378393	2	1376.67	1.91462	22.3696	1
High	APsDSsLGTPSDGRPELR	3	1	1	Q15642	S3(Phospho); S6(Phospho)	0	S(3): 100.0; S(5): 1.6; S(6): 96.8; T(9): 1.6; S(11): 0.0	1.0555e+07	0	0.002322	28.02	0.0404657	2	2001.83	1.42114	17.7878	1
High	APsDSSLGTPSDGRPELR	2	1	1	Q15642	S3(Phospho)	0	S(3): 100.0; S(5): 0.0; S(6): 0.0; T(9): 0.0; S(11): 0.0	1.35832e+07	0	6.262e-08	43.15	0.0014743	3	1921.87	0.119328	15.1222	1
High	sFGNPFEPQAR	1	1	1	Q8N5S9	S1(Phospho)	0	S(1): 100.0	3.37095e+06	0	9.118e-05	47.09	0.000360576	2	1329.56	0.38472	23.9671	0
High	IPVEGPLsPSR	1	1	1	O00512	S8(Phospho)	0	S(8): 99.5; S(10): 0.5	9.19407e+06	0	1.053e-05	47.05	0.000391526	2	1231.61	0.521284	19.648	0
High	SIsADSFDQR	1	1	1	O00512	S3(Phospho)	0	S(1): 0.0; S(3): 100.0; S(6): 0.0	1.72936e+06	0.001	0.009957	20.66	0.120262	2	1205.49	1.29462	16.2817	0
High	PAAPPRPLDREsPGVENK	1	1	1	O00512	S12(Phospho)	0	S(12): 100.0	1.87227e+07	0	2.564e-05	12.12	1.53441	3	2009.98	0.375157	11.1009	2
High	TSDIFGsPVTATSR	1	1	1	Q9H910	S7(Phospho)	0	T(1): 0.0; S(2): 0.0; S(7): 100.0; T(10): 0.0; T(12): 0.0; S(13): 0.0	7.39057e+06	0	4.361e-08	47.04	0.000472496	2	1518.68	0.240511	22.5253	0
High	tSPLNSSGSSQGR	2	1	1	P51003	T1(Phospho)	0	T(1): 50.0; S(2): 50.0; S(6): 0.0; S(7): 0.0; S(9): 0.0; S(10): 0.0	3.05259e+06	0	6.984e-07	47.02	0.000321747	2	1357.58	2.50011	7.88932	0
High	EPLIPAsPK	1	1	1	Q9Y613	S7(Phospho)	0	S(7): 100.0	7.963e+06	0	0.002433	37.28	0.00288085	2	1031.52	0.629785	18.6014	0
High	sLEGGGcPAR	1	1	1	Q9Y613	S1(Phospho); C7(Carbamidomethyl)	0	S(1): 100.0	5.6258e+06	0	0.0004615	34	0.00463795	2	1083.43	-1.07467	8.75613	0
High	TLsPTPSAEGYQDVR	2	1	1	O14639	S3(Phospho)	0	T(1): 0.0; S(3): 100.0; T(5): 0.0; S(7): 0.0; Y(11): 0.0	6278297	0	1.144e-08	46.99	0.000497966	2	1700.75	0.258196	18.6158	0
High	YQPLAsTASDNDFVTPEPR	2	1	1	Q15021	S6(Phospho)	0	Y(1): 0.0; S(6): 49.7; T(7): 49.7; S(9): 0.6; T(15): 0.0	9.52615e+06	0	1.109e-08	46.94	0.000619044	2	2187.96	-0.214961	25.1532	0
High	HPSsPSALR	1	1	1	O60504	S4(Phospho)	0	S(3): 0.0; S(4): 100.0; S(6): 0.0	1.06488e+07	0.003	0.04611	29.9	0.0134051	2	1031.47	2.43121	6.42591	0
High	LcDDGPQLPTsPR	1	1	1	O60504	C2(Carbamidomethyl); S11(Phospho)	0	T(10): 0.6; S(11): 99.4	3.51018e+07	0	3.39e-06	42.32	0.00127778	2	1535.66	0.236621	19.1925	0
High	IAQVsPGPR	1	1	1	Q9NQS7	S5(Phospho)	0	S(5): 100.0	9.336e+06	0	0.0001279	46.7	0.00037735	2	1004.49	-0.042868	11.3582	0
High	APsPPVEHPR	1	1	1	Q86WR7	S3(Phospho)	0	S(3): 100.0	2.15533e+07	0	1.825e-06	46.66	0.000426155	2	1166.54	0.728808	8.87017	0
High	sFTLDDESLK	1	1	1	Q86WR7	S1(Phospho)	0	S(1): 98.7; T(3): 1.3; S(8): 0.0	1.88399e+06	0.001	0.005307	11.9	1.16218	2	1234.52	0.420697	23.3903	0
High	IsDAELEAELEK	1	1	1	Q8WUX9	S2(Phospho)	0	S(2): 100.0	4.47394e+06	0	1.134e-05	46.4	0.000491391	2	1426.63	-2.5929	24.1066	0
High	SATSTSAsPTLR	1	1	1	O75061	S8(Phospho)	0	S(1): 0.0; T(3): 0.0; S(4): 0.0; T(5): 0.0; S(6): 0.0; S(8): 99.0; T(10): 1.0	3.58723e+06	0	1.002e-05	46.3	0.000397347	2	1258.57	0.985949	10.6948	0
High	GtLSDSEIETNSATSTIFGK	3	1	1	Q8WXG6	T2(Phospho)	0	T(2): 33.3; S(4): 33.3; S(6): 33.3; T(10): 0.0; S(12): 0.0; T(14): 0.0; S(15): 0.0; T(16): 0.0	7.19281e+06	0	1.112e-08	46.23	0.000732563	2	2137.96	4.86754	27.4321	0
High	VAsFSIPGSSSR	1	1	1	Q14573	S3(Phospho)	0	S(3): 100.0; S(5): 0.0; S(9): 0.0; S(10): 0.0; S(11): 0.0	6.67002e+06	0	6.917e-05	46.16	0.000522942	2	1274.58	0.169592	21.8206	0
High	KQsVFSAPSLSAGASAAEPLDR	2	1	1	Q14573	S3(Phospho)	0	S(3): 98.1; S(6): 1.9; S(9): 0.0; S(11): 0.0; S(15): 0.0	1.82492e+07	0	9.169e-05	10.85	2.41328	3	2269.09	0.574767	22.7095	1
High	SGYHDDsDEDLLE	1	1	1	Q99523	S7(Phospho)	0	S(1): 0.0; Y(3): 0.0; S(7): 100.0	1.15595e+07	0	5.9e-05	45.98	0.000256133	2	1574.56	1.36615	20.1226	0
High	SAsEPSLHR	1	2	2	P10398;P04049	S3(Phospho)	0	S(1): 0.0; S(3): 100.0; S(6): 0.0	3.23545e+07	0.001	0.008484	42.62	0.00068924	2	1063.46	1.36089	7.07632	0
High	GsPSPASVSSGR	1	1	1	P10398	S2(Phospho)	0	S(2): 100.0; S(4): 0.0; S(7): 0.0; S(9): 0.0; S(10): 0.0	4.74353e+06	0	0.0003302	27.42	0.0240003	2	1168.5	-0.0214402	9.27778	0
High	AEsPSPAPPPGLR	1	1	1	Q9BUA3	S3(Phospho)	0	S(3): 100.0; S(5): 0.0	8.91648e+06	0	3.218e-07	45.81	0.000564207	2	1355.64	1.68384	16.9899	0
High	EREEsEDELEEANGNNPIDIEVDQNK	1	1	1	Q9UKL0	S5(Phospho)	0	S(5): 100.0	1.53347e+07	0	2.298e-08	45.46	0.00101689	3	3095.3	0.6722	22.6737	1
High	NLGsINTELQDVQR	1	1	1	O75396	S4(Phospho)	0	S(4): 100.0; T(7): 0.0	4.97805e+07	0	5.796e-06	45.44	0.000845847	2	1666.78	1.3413	24.3256	0
High	EEsLVEELSPASEK	1	1	1	Q9BXK5	S3(Phospho)	0	S(3): 100.0; S(9): 0.0; S(12): 0.0	2.769e+06	0	1.302e-05	39.48	0.00272218	2	1626.72	0.95396	24.5823	0
High	sSPATSLFVELDEEEVK	2	1	1	Q9BXK5	S1(Phospho)	0	S(1): 49.6; S(2): 49.6; T(5): 0.7; S(6): 0.0	8.5266e+06	0	4.554e-05	26.35	0.0699853	2	1959.89	1.07936	32.2126	0
High	GSAPHSESDLPEQEEEILGsDDDEQEDPNDYcK	1	1	1	Q96SB4	S20(Phospho); C32(Carbamidomethyl)	0	S(2): 0.0; S(6): 0.0; S(8): 0.0; S(20): 100.0; Y(31): 0.0	3.85559e+07	0	2.991e-10	45.4	0.00077292	3	3814.48	2.48564	21.9826	0
High	TAVSVTQGGHsR	1	1	1	P40425	S11(Phospho)	0	T(1): 0.0; S(4): 0.0; T(6): 0.0; S(11): 100.0	3.68092e+06	0	2.375e-05	45.33	0.00047627	2	1279.58	1.94459	6.50471	0
High	VPsPGMEEAGcSR	1	1	1	Q96RL1	S3(Phospho); C11(Carbamidomethyl)	0	S(3): 100.0; S(12): 0.0	8.74884e+06	0	2.875e-07	45.27	0.000319454	2	1456.56	0.847465	13.8987	0
High	QIQTsPVPVR	1	1	1	Q9NRM7	S5(Phospho)	0	T(4): 0.0; S(5): 100.0	2.23692e+06	0	0.003288	25.61	0.0566066	2	1204.61	0.165985	15.5285	0
High	RDsLQKPGLEAPPR	1	1	1	Q9NRM7	S3(Phospho)	0	S(3): 100.0	3.94255e+06	0	1.378e-05	45.23	0.000701804	3	1643.83	-0.00612091	11.6019	2
High	RLsEQLAHTPTAFK	1	1	1	Q9UBF8	S3(Phospho)	0	S(3): 100.0; T(9): 0.0; T(11): 0.0	4.17279e+06	0	3.693e-07	23.1	0.12171	3	1678.83	0.157741	15.1738	1
High	sVENLPEcGITHEQR	2	1	1	Q9UBF8	S1(Phospho); C8(Carbamidomethyl)	0	S(1): 100.0; T(11): 0.0	9.31741e+06	0	1.038e-07	45.21	0.000780369	2	1848.8	1.34706	15.1059	0
High	mDLAAAAEPGAGsQHLEVR	1	1	1	Q14566	N-Term(Acetyl); S13(Phospho)	0	S(13): 100.0	2.01036e+06	0	0.0004078	26.19	0.0663604	3	2044.92	0.2238	27.8524	0
High	GFSVVADtPELQR	1	1	1	Q14847	T8(Phospho)	0	S(3): 0.0; T(8): 100.0	5.62301e+06	0	2.571e-07	45.09	0.000791391	2	1498.7	1.59625	23.2211	0
High	YEPQsPGYEPR	1	1	1	Q9H5H4	S5(Phospho)	0	Y(1): 0.0; S(5): 100.0; Y(8): 0.0	3.6262e+06	0	0.0002227	45.08	0.000473445	2	1402.56	-1.89322	13.6931	0
High	AGGDLSLsPGR	1	1	1	Q9BUH8	S8(Phospho)	0	S(6): 0.0; S(8): 100.0	2.22627e+06	0	0.0004434	36	0.00384319	2	1109.5	0.296292	16.5549	0
High	DRRPsVDAPVTDVGFLR	1	1	1	Q9BUH8	S5(Phospho)	0	S(5): 100.0; T(11): 0.0	6.09655e+06	0	0.0006356	30.99	0.0197448	3	1979.97	2.48254	22.331	2
High	PLsPGALQLAGEK	1	1	1	Q8TEK3	S3(Phospho)	0	S(3): 100.0	2.60906e+06	0	7.179e-06	45.06	0.00058947	2	1360.69	1.63037	23.8137	0
High	ASAGTPSLSAGVsPK	1	1	1	Q8TEK3	S13(Phospho)	0	S(2): 0.0; T(5): 0.0; S(7): 0.0; S(9): 1.1; S(13): 98.9	3.16643e+06	0	0.002764	13.05	1.20147	2	1409.67	3.38545	16.5348	0
High	RDsVLAASR	1	1	1	Q14643	S3(Phospho)	0	S(3): 100.0; S(8): 0.0	1.25347e+07	0.002	0.02678	45.02	0.000672044	2	1054.51	3.86342	7.56406	1
High	sLLDASEEAIKK	1	1	1	P18206	S1(Phospho)	0	S(1): 100.0; S(6): 0.0	5.27e+06	0	2.901e-07	44.99	0.000660855	2	1383.68	0.641481	17.7543	1
High	LFQLGPPsPVK	1	2	1	O95997	S8(Phospho)	0	S(8): 100.0	1.30949e+07	0	1.57e-05	44.78	0.000597124	2	1262.65	0.157117	26.2721	0
High	SGFGEISsPVIR	1	1	1	P57740	S8(Phospho)	0	S(1): 0.0; S(7): 0.8; S(8): 99.2	3.01958e+06	0	3.42e-06	44.75	0.000701753	2	1328.63	0.925611	24.0669	0
High	VTQHEsDNENEIQIQNK	2	1	1	Q5VZL5	S6(Phospho)	0	T(2): 1.0; S(6): 99.0	7.6305e+06	0	3.323e-06	31.62	0.0204874	3	2105.92	1.71286	11.1888	0
High	cGGVEQASSsPR	1	1	1	Q5VZL5	C1(Carbamidomethyl); S10(Phospho)	0	S(8): 0.6; S(9): 0.6; S(10): 98.8	2.53409e+06	0	3.431e-06	37.61	0.00186384	2	1314.51	0.174769	7.30395	0
High	ASPsPQPSSQPLQIHR	2	1	1	Q9HC35	S4(Phospho)	0	S(2): 1.3; S(4): 98.7; S(8): 0.0; S(9): 0.0	1.27531e+07	0	7.364e-07	44.54	0.000922846	3	1809.87	0.512338	14.031	0
High	SAsEPSLHR	1	2	2	P10398;P04049	S3(Phospho)	0	S(1): 0.0; S(3): 100.0; S(6): 0.0	3.23545e+07	0.001	0.008484	42.62	0.00068924	2	1063.46	1.36089	7.07632	0
High	STsTPNVHMVSTTLPVDSR	3	1	1	P04049	S3(Phospho)	0	S(1): 0.8; T(2): 0.8; S(3): 49.1; T(4): 49.1; S(11): 0.0; T(12): 0.0; T(13): 0.0; S(18): 0.0	4.53043e+06	0	1.126e-05	25.38	0.0841678	3	2108.97	1.39085	20.9526	0
High	RGSAVAtSHFEVGNTcPSEFPSK	3	1	1	Q92576	T7(Phospho); C16(Carbamidomethyl)	0	S(3): 0.7; T(7): 49.6; S(8): 49.6; T(15): 0.0; S(18): 0.0; S(22): 0.0	6.48193e+06	0	0.0001487	18.28	0.539395	3	2545.13	4.74658	16.7966	1
High	MAPPVDDLsPK	1	1	1	Q92576	S9(Phospho)	0	S(9): 100.0	1.32327e+07	0	0.0001062	37.5	0.00353878	2	1249.55	0.506138	19.6894	0
High	sPQFINLK	1	1	1	Q92576	S1(Phospho)	0	S(1): 100.0	2.096e+06	0.001	0.01307	17.22	0.312956	2	1026.5	0.107641	21.9654	0
High	mAPPVDDLsPK	1	1	1	Q92576	M1(Oxidation); S9(Phospho)	0	S(9): 100.0	5.62293e+06	0	0.001478	32.65	0.0105934	2	1265.55	1.04533	16.572	0
High	NEsLTATDGLR	1	1	1	Q5TCZ1	S3(Phospho)	0	S(3): 100.0; T(5): 0.0; T(7): 0.0	1.77126e+06	0	1.678e-05	44.43	0.00073558	2	1256.56	2.55382	16.9617	0
High	SETAPAAPAAPAPAEKtPVK	2	1	1	P10412	T17(Phospho)	0	S(1): 0.0; T(3): 0.0; T(17): 100.0	1.61237e+07	0	8.105e-07	12.25	1.53085	3	1983.98	0.667543	13.0278	1
High	sETAPAAPAAPAPAEKtPVK	1	1	1	P10412	N-Term(Acetyl); T17(Phospho)	0	S(1): 0.0; T(3): 0.0; T(17): 100.0	2.08482e+08	0	2.379e-06	32.14	0.0162511	2	2025.99	2.13359	17.5797	1
High	sETAPAAPAAPAPAEKtPVKK	1	1	1	P10412	N-Term(Acetyl); T17(Phospho)	0	S(1): 0.0; T(3): 0.0; T(17): 100.0	4.72231e+07	0	4.368e-08	20.3	0.215582	3	2154.09	1.12243	13.7849	2
High	IPMTPTSSFVSPPPPtASPHSNR	2	1	1	Q7Z5L9	T16(Phospho)	0	T(4): 0.0; T(6): 0.0; S(7): 0.0; S(8): 0.0; S(11): 0.0; T(16): 49.6; S(18): 49.6; S(21): 0.8	1.17892e+07	0	0.0003039	15.82	0.972655	3	2485.16	2.38028	22.1847	0
High	RKPsPEPEGEVGPPK	2	1	1	Q7Z5L9	S4(Phospho)	0	S(4): 100.0	2.87189e+07	0	9.611e-09	32.92	0.014141	3	1683.81	0.40084	8.08166	2
High	KPsPEPEGEVGPPK	1	1	1	Q7Z5L9	S3(Phospho)	0	S(3): 100.0	1.87865e+07	0	0.0003472	29.72	0.0254383	2	1527.72	5.6743	10.8995	1
High	LEEPPELNRQsPNPR	1	1	1	Q7Z5L9	S11(Phospho)	0	S(11): 100.0	2.68723e+07	0	7.457e-05	23.16	0.149748	3	1855.87	0.660392	14.1939	1
High	METEADAPsPAPsLGER	1	1	1	Q12873	S9(Phospho); S13(Phospho)	0	T(3): 0.0; S(9): 100.0; S(13): 100.0	4.25974e+06	0	0.001225	22.35	0.0975023	2	1917.73	-0.00576348	21.9878	0
High	TSPTTPEAsATNSPcTSKPATPAPSEK	7	1	1	Q12873	S9(Phospho); C15(Carbamidomethyl)	0	T(1): 0.0; S(2): 0.0; T(4): 0.9; T(5): 0.9; S(9): 32.1; T(11): 32.1; S(13): 32.1; T(16): 0.9; S(17): 0.9; T(21): 0.0; S(25): 0.0	3.97183e+06	0	0.001137	11.96	2.4039	3	2795.25	2.84199	12.3663	1
High	METEADAPsPAPSLGER	1	1	1	Q12873	S9(Phospho)	0	T(3): 0.0; S(9): 100.0; S(13): 0.0	7.87319e+06	0	1.916e-07	36.67	0.00511286	2	1837.77	-0.0602453	18.5106	0
High	ELQGDGPPSsPTNDPTVK	1	1	1	Q12873	S10(Phospho)	0	S(9): 1.5; S(10): 97.1; T(12): 1.5; T(16): 0.0	7.42394e+06	0	0.0005088	25.81	0.0728221	2	1918.84	-2.17189	15.6175	0
High	mETEADAPsPAPsLGER	1	1	1	Q12873	M1(Oxidation); S9(Phospho); S13(Phospho)	0	T(3): 0.0; S(9): 100.0; S(13): 100.0	2.28343e+06	0.001	0.01591	11.78	1.05535	2	1933.73	0.0357156	20.2914	0
High	EYIPGQPPLSQSSDSsPTR	4	1	1	P07814	S16(Phospho)	0.0294	Y(2): 0.0; S(10): 0.0; S(12): 0.0; S(13): 0.0; S(15): 49.8; S(16): 49.8; T(18): 0.5	2.1137e+08	0	2.074e-07	33.4	0.0140326	2	2125.95	2.55135	21.6246	0
High	LTWHscPEDEAQ	2	1	1	Q13185	S5(Phospho); C6(Carbamidomethyl)	0.0435	T(2): 0.0; S(5): 100.0	4.45385e+06	0.002	0.03124	22.27	0.0702617	2	1552.58	1.48347	16.9549	0
High	SLsDSESDDSK	2	1	1	Q13185	S3(Phospho)	0.0455	S(1): 0.0; S(3): 100.0; S(5): 0.0; S(7): 0.0; S(10): 0.0	2.62221e+06	0	9.861e-05	42.09	0.000309008	2	1249.45	0.0101185	7.20909	0
High	PSsPGGLPEEDSVLFNK	2	1	1	Q5R372	S3(Phospho)	0	S(2): 0.0; S(3): 100.0; S(12): 0.0	8.00174e+06	0	7.388e-07	44.05	0.00106652	2	1852.84	2.00517	26.2292	0
High	TEVsPVPR	1	1	1	O43159	S4(Phospho)	0	T(1): 0.0; S(4): 100.0	5.75094e+06	0	0.00236	44.01	0.000492518	2	964.45	-0.236062	12.2327	0
High	QsPGSTSPKPPHTLSR	1	1	1	O43159	S2(Phospho)	0	S(2): 99.9; S(5): 0.0; T(6): 0.0; S(7): 0.0; T(13): 0.0; S(15): 0.0	4.24523e+06	0	0.0004904	11.36	1.96311	3	1756.84	-0.132453	8.12009	1
High	EyGNISYDLHHEDSEDAEETSVPEAPK	4	1	1	Q9H7F4	Y2(Phospho)	0	Y(2): 99.9; S(6): 0.0; Y(7): 0.0; S(14): 0.0; T(20): 0.0; S(21): 0.0	7.44453e+06	0	1.558e-06	43.95	0.00135313	3	3141.28	-0.94642	19.357	0
High	LLKPGEEPSEYtDEEDTK	1	1	1	O15173	T12(Phospho)	0	S(9): 0.0; Y(11): 0.0; T(12): 100.0; T(17): 0.0	9.57273e+06	0	1.383e-05	43.94	0.00121094	3	2159.93	1.7148	14.6339	1
High	LLKPGEEPSEYtDEEDTKDHNK	3	1	1	O15173	T12(Phospho)	0	S(9): 0.0; Y(11): 1.5; T(12): 98.5; T(17): 0.0	3.37005e+07	0	4.075e-05	23.95	0.145985	4	2654.15	-0.4052	10.9863	2
High	LNSEAsPSR	1	1	1	Q13111	S6(Phospho)	0	S(3): 0.0; S(6): 99.0; S(8): 1.0	5.99384e+06	0.002	0.03308	24.8	0.0390735	2	1040.44	2.2015	6.34009	0
High	sPDLEASLDTLENNcHVGSDIDFRPK	1	1	1	Q13111	S1(Phospho); C15(Carbamidomethyl)	0	S(1): 100.0; S(7): 0.0; T(10): 0.0; S(19): 0.0	2.42295e+06	0	0.0001979	15.38	1.31684	3	3009.35	6.34115	26.5723	1
High	sPSTTYLHTPTPSEDAAIPSK	2	1	1	Q13111	S1(Phospho)	0.05	S(1): 98.7; S(3): 1.3; T(4): 0.0; T(5): 0.0; Y(6): 0.0; T(9): 0.0; T(11): 0.0; S(13): 0.0; S(20): 0.0	1.87372e+07	0	5.718e-06	38.24	0.00509143	3	2280.04	0.546238	19.6877	0
High	GFGFGQGAGALVHsE	1	1	1	P21291	S14(Phospho)	0	S(14): 100.0	8.44174e+06	0	4.896e-08	43.88	0.000765317	2	1513.65	2.29251	25.4016	0
High	DLAVPAALtPR	1	1	1	Q8TEM1	T9(Phospho)	0	T(9): 100.0	1.22064e+07	0	0.0001665	43.85	0.000774743	2	1203.61	0.36127	25.9579	0
High	AsPGHSPHYFAASSPTSPNALPPAR	2	1	1	Q8TEM1	S2(Phospho)	0	S(2): 33.3; S(6): 33.3; Y(9): 33.3; S(13): 0.0; S(14): 0.0; T(16): 0.0; S(17): 0.0	6.26172e+06	0.001	0.004326	12.58	1.85774	3	2597.21	5.43674	16.4413	0
High	ESKGsPVFLPR	1	1	1	Q9NYV4	S5(Phospho)	0	S(2): 1.3; S(5): 98.7	7.53463e+06	0.002	0.01947	22.81	0.111265	2	1296.63	-0.210712	15.8226	1
High	NSsPAPPQPAPGK	1	1	1	Q9NYV4	S3(Phospho)	0	S(2): 0.0; S(3): 100.0	2.10626e+07	0	7.683e-05	35.66	0.00650587	2	1327.61	0.661219	10.6441	0
High	GsPVFLPR	1	1	1	Q9NYV4	S2(Phospho)	0	S(2): 100.0	3.69626e+06	0.001	0.01035	34.48	0.00552499	2	952.465	-0.432548	21.2498	0
High	DRSsPPPGYIPDELHQVAR	2	1	1	Q9Y2U5	S4(Phospho)	0	S(3): 50.0; S(4): 50.0; Y(9): 0.0	4.08706e+07	0	1.114e-09	39.12	0.0041637	3	2214.04	1.41426	19.6514	1
High	RLsIIGPTSR	1	1	1	Q9Y2U5	S3(Phospho)	0	S(3): 100.0; T(8): 0.0; S(9): 0.0	5.05281e+06	0.001	0.006042	25.68	0.0425873	2	1179.63	1.10187	15.2485	1
High	AQsYPDNHQEFSDYDNPIFEK	1	1	1	Q9Y2U5	S3(Phospho)	0	S(3): 100.0; Y(4): 0.0; S(12): 0.0; Y(14): 0.0	8.29432e+06	0	0.0007096	18.97	0.394874	3	2624.07	1.73769	23.2585	0
High	GtSPRPPEGGLGYSQLGDDDLK	2	2	1	Q9UQ88	T2(Phospho)	0	T(2): 50.0; S(3): 50.0; Y(13): 0.0; S(14): 0.0	1.00914e+07	0	5.593e-08	43.76	0.00149358	3	2339.06	0.281746	20.8546	1
High	QSMDMsPIK	1	1	1	Q14562	S6(Phospho)	0	S(2): 0.0; S(6): 100.0	2.71053e+06	0.001	0.004354	43.74	0.000477616	2	1116.45	0.554306	16.6949	0
High	SKPsPQKDQALGDGIAPPQK	1	1	1	Q9H9J4	S4(Phospho)	0	S(1): 1.3; S(4): 98.7	3.50533e+06	0	6.972e-05	33.22	0.0139594	3	2142.06	0.909425	12.0772	2
High	DSALAEAPEGLsPAPPAR	1	1	1	Q9H9J4	S12(Phospho)	0	S(2): 0.0; S(12): 100.0	8.07192e+06	0	1.656e-07	36.74	0.0060691	2	1828.85	1.8873	24.1322	0
High	NRPTsISWDGLDSGK	1	1	1	P30086	S5(Phospho)	0	T(4): 1.0; S(5): 99.0; S(7): 0.0; S(13): 0.0	7.46128e+06	0	6.258e-05	43.62	0.00113842	2	1712.76	0.244982	19.7157	1
High	ILELtPEPDRPR	1	1	1	Q14004	T5(Phospho)	0	T(5): 100.0	5.29731e+06	0	0.00123	22.09	0.139672	2	1515.76	1.288	18.1485	1
High	LYSSEESRPYtNK	1	1	1	Q14004	T11(Phospho)	0	Y(2): 0.0; S(3): 0.0; S(4): 0.0; S(7): 0.0; Y(10): 0.9; T(11): 99.1	4.30443e+06	0.001	0.01409	36.84	0.00521676	2	1653.72	2.42471	9.04665	1
High	GGDVsPSPYSSSSWR	1	1	1	Q14004	S5(Phospho)	0	S(5): 100.0; S(7): 0.0; Y(9): 0.0; S(10): 0.0; S(11): 0.0; S(12): 0.0; S(13): 0.0	4.3396e+06	0	7.049e-05	33.01	0.00892562	2	1648.67	1.20028	18.7861	0
High	cLLADLPLPPELPGGDDLsKSPEEK	2	1	1	Q14004	C1(Carbamidomethyl); S19(Phospho)	0	S(19): 50.0; S(21): 50.0	3.19981e+06	0.001	0.006607	10.68	2.77897	3	2770.33	2.52371	33.5889	1
High	VEQMPQAsPGLAPR	1	1	1	Q8N3F8	S8(Phospho)	0	S(8): 100.0	8.34646e+06	0	1.399e-06	43.47	0.00110421	2	1560.73	0.987513	18.9474	0
High	KPsPAASPATK	1	1	1	Q8N3F8	S3(Phospho)	0	S(3): 100.0; S(7): 0.0; T(10): 0.0	3.64288e+06	0.001	0.003784	21.78	0.117483	2	1134.56	0.489682	5.84095	1
High	VNDAEPGsPEAPQGK	1	1	1	Q8N8A6	S8(Phospho)	0	S(8): 100.0	1.37829e+07	0	1.517e-06	43.38	0.000920692	2	1575.67	-0.0733655	10.5811	0
High	SLLSsPTK	1	1	1	Q92667	S5(Phospho)	0	S(1): 0.0; S(4): 0.0; S(5): 99.1; T(7): 0.9	3959581	0.001	0.005116	39.59	0.00148915	2	912.444	0.0799556	14.4793	0
High	SIPLEcPLsSPK	2	1	1	Q92667	C6(Carbamidomethyl); S9(Phospho)	0	S(1): 0.0; S(9): 50.0; S(10): 50.0	2.67781e+06	0	0.00051	28.95	0.0255974	2	1407.66	0.850737	23.25	0
High	RIDFIPVsPAPsPTR	1	1	1	Q96E09	S8(Phospho); S12(Phospho)	0	S(8): 100.0; S(12): 98.4; T(14): 1.6	4.21461e+06	0.001	0.01115	11.95	1.86054	2	1812.85	1.09878	28.8925	1
High	RNsTTFPSR	1	1	1	Q96E09	S3(Phospho)	0	S(3): 100.0; T(4): 0.0; T(5): 0.0; S(8): 0.0	3.3689e+06	0	0.0008663	43.16	0.000710096	2	1145.51	0.517975	7.39988	1
High	SNsAPLIHGLSDTSPVFQAEAPSAR	5	1	1	Q96E09	S3(Phospho)	0	S(1): 1.7; S(3): 96.5; S(11): 1.7; T(13): 0.0; S(14): 0.0; S(23): 0.0	1.46528e+07	0	2.433e-06	22.33	0.186548	3	2632.25	2.33749	26.5466	0
High	TPQsPTLPPAK	2	1	1	P78310	S4(Phospho)	0	T(1): 0.0; S(4): 100.0; T(6): 0.0	5.19591e+07	0	0.0001261	43.14	0.000902637	2	1216.6	0.464976	14.3588	0
High	KVsSAEGAAKEEPK	2	1	1	P05114	S3(Phospho)	0	S(3): 50.0; S(4): 50.0	5.29697e+06	0	9.04e-07	43.07	0.00102087	3	1510.71	-0.0760668	5.9417	2
High	RDPEDsDVFEEDTHL	1	1	1	Q9NZ53	S6(Phospho)	0	S(6): 100.0; T(13): 0.0	1.3329e+07	0	2.133e-05	43.04	0.000769718	2	1883.73	0.264303	21.5049	1
High	TEFLDLDNSPLSPPsPR	1	1	1	Q8NCF5	S15(Phospho)	0	T(1): 0.0; S(9): 0.0; S(12): 0.0; S(15): 100.0	9.20642e+06	0	1.613e-08	43	0.0015612	2	1964.9	0.741323	31.6906	0
High	HQTLEVSLSRDsPLK	2	1	1	Q8NCF5	S12(Phospho)	0	T(3): 0.0; S(7): 0.0; S(9): 1.0; S(12): 99.0	4.0079e+06	0	0.002518	11.7	1.71387	3	1789.89	0.62626	15.4406	1
High	sGGDGGDEVEGSGVGAGEGETVQHFPLAR	1	1	1	Q96DT7	S1(Phospho)	0	S(1): 100.0; S(12): 0.0; T(21): 0.0	5.24926e+06	0	1.23e-06	42.95	0.00187333	3	2851.22	0.413295	22.1203	0
High	FsGGFGAR	1	2	1	O15523	S2(Phospho)	0	S(2): 100.0	5.40482e+06	0.002	0.01998	20.69	0.0895755	2	878.356	-0.200319	14.9138	0
High	ASDPQsPPQVSR	1	1	1	Q7L7X3	S6(Phospho)	0	S(2): 0.0; S(6): 100.0; S(11): 0.0	9.38613e+06	0.004	0.04898	13.32	0.952124	2	1348.59	1.04075	11.1648	0
High	NsPQALR	1	1	1	Q7L7X3	S2(Phospho)	0	S(2): 100.0	5.57065e+06	0.004	0.05266	42.83	0.000648887	2	865.394	1.0065	7.50741	0
High	SEDPPGQEAGsEEEGSSASGLAK	1	1	1	O75153	S11(Phospho)	0	S(1): 0.0; S(11): 49.7; S(16): 49.7; S(17): 0.6; S(19): 0.0	7.22726e+06	0	4.37e-08	42.72	0.00121881	2	2298.92	-1.08988	14.2083	0
High	APLKPYPVsPSDK	1	1	1	P41252	S9(Phospho)	0	Y(6): 0.0; S(9): 100.0; S(11): 0.0	6.53455e+06	0	0.0001104	42.65	0.00115441	2	1478.73	-0.302291	13.8953	1
High	SQDVAVsPQQQQcSK	1	1	1	Q96F86	S7(Phospho); C13(Carbamidomethyl)	0	S(1): 0.0; S(7): 100.0; S(14): 0.0	1.56161e+07	0	2.673e-06	42.59	0.00127787	2	1769.75	-1.84952	10.5932	0
High	MESEGGADDsAEEGDLLDDDDNEDRGDDQLELIK	1	1	1	P07910	S10(Phospho)	0	S(3): 50.0; S(10): 50.0	4.30437e+07	0	1.559e-07	19.58	0.317794	3	3790.5	2.03261	27.5872	1
High	MESEGGADDsAEEGDLLDDDDNEDRGDDQLELIKDDEK	1	1	1	P07910	S10(Phospho)	0	S(3): 50.0; S(10): 50.0	1.23965e+08	0	8.634e-08	42.56	0.00169715	3	4277.72	9.54806	24.5167	2
High	mESEGGADDsAEEGDLLDDDDNEDRGDDQLELIK	1	1	1	P07910	M1(Oxidation); S10(Phospho)	0	S(3): 50.0; S(10): 50.0	2.46673e+07	0	9.951e-08	23.83	0.123372	3	3806.49	2.14132	27.1093	1
High	TPAStPVSGTPQAsPMIER	3	1	1	Q9UHR4	T5(Phospho); S14(Phospho)	0	T(1): 0.0; S(4): 0.6; T(5): 33.1; S(8): 33.1; T(10): 33.1; S(14): 100.0	5.00703e+06	0	0.0002686	19.5	0.322019	2	2086.9	1.95805	23.4023	0
High	LLEENETEAVTVPTPsPTPVR	2	1	1	Q9UHR4	S16(Phospho)	0	T(7): 0.0; T(11): 0.0; T(14): 0.0; S(16): 100.0; T(18): 0.0	2.30255e+07	0	2.528e-08	34.25	0.0107677	2	2359.15	4.61347	26.1865	0
High	TPASTPVSGTPQAsPMIER	1	1	1	Q9UHR4	S14(Phospho)	0	T(1): 0.0; S(4): 0.0; T(5): 0.0; S(8): 0.0; T(10): 0.0; S(14): 100.0	5.1861e+06	0	1.559e-06	35.57	0.00876369	2	2006.93	2.22971	19.6085	0
High	SEHQNsSPTcQEDEEDVR	3	1	1	Q9NP74	S6(Phospho); C10(Carbamidomethyl)	0	S(1): 0.9; S(6): 49.1; S(7): 49.1; T(9): 0.9	2.31868e+06	0	3.877e-06	42.43	0.000911508	3	2226.83	1.4462	7.81497	0
High	EIsPGSGPGEIR	1	1	1	O43491	S3(Phospho)	0	S(3): 100.0; S(6): 0.0	4.82694e+06	0	1.156e-05	42.35	0.0010245	2	1278.57	1.36568	16.0284	0
High	QQLEEEEENFSRPQIDENPLDDNsEEEMEDAPK	1	1	1	Q5F1R6	S24(Phospho)	0	S(11): 0.0; S(24): 100.0	1.97502e+07	0	4.254e-06	42.33	0.0018684	3	4013.63	-1.26666	24.8245	1
High	LTFDTTFsPNTGKK	1	1	1	P45880	S8(Phospho)	0	T(2): 0.0; T(5): 0.0; T(6): 0.0; S(8): 99.2; T(11): 0.8	4.93341e+06	0	0.000736	42.26	0.00157487	2	1636.76	-0.971917	19.2181	1
High	PALQPsPSIR	2	1	1	Q9BXI6	S6(Phospho)	0	S(6): 50.0; S(8): 50.0	3.32186e+06	0	0.0008848	42.26	0.000998411	2	1145.57	1.24067	16.5789	0
High	TDGsIsGDRQPVTVADYISR	1	1	1	P51116	S4(Phospho); S6(Phospho)	0	T(1): 0.0; S(4): 100.0; S(6): 98.0; T(13): 2.0; Y(17): 0.0; S(19): 0.0	2.48149e+07	0	0.002428	25.14	0.0891031	3	2297	4.8988	25.5815	1
High	TGGPAYGPSSDVSTAsETESEKR	1	1	1	P51116	S16(Phospho)	0	T(1): 0.0; Y(6): 0.0; S(9): 0.0; S(10): 0.0; S(13): 0.0; T(14): 0.0; S(16): 50.0; T(18): 50.0; S(20): 0.0	1.06297e+07	0	4.655e-07	40.87	0.0029874	3	2393.01	-0.229143	12.5017	1
High	KAsPEAASTPR	1	1	1	P29590	S3(Phospho)	0	S(3): 100.0; S(8): 0.0; T(9): 0.0	2.45913e+06	0	5.255e-05	42	0.00123983	2	1194.56	6.28287	5.65051	1
High	AVSPPHLDGPPsPR	1	1	1	P29590	S12(Phospho)	0	S(3): 0.0; S(12): 100.0	2.19123e+06	0.001	0.01251	12.21	1.38571	2	1506.71	0.478346	15.4715	0
High	sSPEQPRPSTSK	2	1	1	P29590	S1(Phospho)	0	S(1): 50.0; S(2): 50.0; S(9): 0.0; T(10): 0.0; S(11): 0.0	1.04692e+07	0.001	0.008863	18.27	0.298617	2	1380.62	0.953623	5.78963	1
High	DKRPLsGPDVGTPQPAGLASGAK	1	1	1	O96013	S6(Phospho)	0	S(6): 100.0; T(12): 0.0; S(20): 0.0	1.45174e+07	0	6.452e-08	41.91	0.00173926	3	2299.15	0.738512	17.2925	2
High	RLsPPSSSAASSYSFSDLNSTR	2	1	1	P50402	S3(Phospho)	0	S(3): 99.9; S(6): 0.1; S(7): 0.0; S(8): 0.1; S(11): 0.0; S(12): 0.0; Y(13): 0.0; S(14): 0.0; S(16): 0.0; S(20): 0.0; T(21): 0.0	2.60643e+07	0	1.928e-06	22	0.238186	3	2397.07	-0.521667	20.9194	1
High	DSAYQSITHYRPVsASR	1	1	1	P50402	S14(Phospho)	0	S(2): 0.0; Y(4): 0.0; S(6): 0.0; T(8): 0.0; Y(10): 0.0; S(14): 1.4; S(16): 98.6	4.00985e+07	0	8.637e-05	41.86	0.00195814	3	2017.91	0.404413	15.7145	1
High	VDsEGDFsENDDAAGDFR	1	1	1	O43823	S3(Phospho); S8(Phospho)	0	S(3): 100.0; S(8): 100.0	7.83293e+06	0	1.129e-05	41.78	0.000398246	2	2105.7	0.566432	26.1054	0
High	ADRDQsPFSK	1	1	1	Q13427	S6(Phospho)	0	S(6): 100.0; S(9): 0.0	1.29556e+07	0.002	0.02704	34.9	0.0042229	2	1230.52	0.157729	6.99051	1
High	sEtPPHWR	1	1	1	Q13427	S1(Phospho); T3(Phospho)	0	S(1): 100.0; T(3): 100.0	4.40133e+06	0.001	0.01495	29.62	0.00758551	2	1169.42	1.31155	14.3673	0
High	AsTFcGTPDYIAPEILQGLK	2	1	1	Q05655	S2(Phospho); C5(Carbamidomethyl)	0	S(2): 49.5; T(3): 49.5; T(7): 1.0; Y(10): 0.0	0	0	0.0002012	20.87	0.269684	2	2261.06	3.62674	35.7532	0
High	sDSASSEPVGIYQGFEK	2	1	1	Q05655	S1(Phospho)	0	S(1): 50.0; S(3): 50.0; S(5): 0.0; S(6): 0.0; Y(12): 0.0	5.20595e+06	0	1.273e-06	41.69	0.00190756	2	1880.8	1.70836	24.3995	0
High	VKPAsPVAQPK	1	1	1	Q96EV2	S5(Phospho)	0	S(5): 100.0	8.14374e+06	0	0.0004624	41.69	0.00106729	2	1201.63	0.481722	7.3598	1
High	sQEmVHLVNK	1	1	1	P16070	S1(Phospho); M4(Oxidation)	0	S(1): 100.0	8.26069e+06	0.001	0.01495	34.53	0.00570841	2	1280.57	-4.22175	9.58101	0
High	sQEMVHLVNK	1	1	1	P16070	S1(Phospho)	0	S(1): 100.0	1.71388e+07	0.001	0.01845	33.68	0.00694249	2	1264.58	0.391517	13.6805	0
High	VQAGPGsPR	1	1	1	Q6PK04	S7(Phospho)	0	S(7): 100.0	1.72089e+07	0.001	0.00458	41.38	0.000909725	2	948.43	-0.0686724	6.94441	0
High	SSsPELVTHLK	3	1	1	Q07960	S3(Phospho)	0	S(1): 0.0; S(2): 0.0; S(3): 100.0; T(8): 0.0	1.20841e+07	0	0.0005834	41.27	0.00153768	2	1277.61	0.624016	14.3408	0
High	AtNESEDEIPQLVPIGK	4	1	1	O76021	T2(Phospho)	0	T(2): 50.0; S(5): 50.0	3.52773e+08	0	0.0008565	25.95	0.0736882	2	1919.91	3.15593	28.8346	0
High	AGLQsLEASGR	1	1	1	O60784	S5(Phospho)	0	S(5): 100.0; S(9): 0.0	1.18089e+06	0	1.992e-05	41.22	0.00151018	2	1168.54	1.84775	17.5734	0
High	SSGEIVYcGQVFEKsPLR	1	1	1	Q02543	C8(Carbamidomethyl); S15(Phospho)	0	S(1): 0.0; S(2): 0.0; Y(7): 0.0; S(15): 100.0	6.57038e+06	0	0.0003678	41.19	0.00246346	2	2135.99	4.90809	21.3211	1
High	ALYDYAGQEADELsFR	1	1	1	Q9UKS6	S14(Phospho)	0	Y(3): 0.0; Y(5): 0.0; S(14): 100.0	2.91194e+06	0.001	0.009291	16.85	0.530803	2	1927.81	0.78602	27.5912	0
High	DGTAPPPQSPGsPGTGQDEEWSDEESPRK	1	1	1	Q9UKS6	S12(Phospho)	0	T(3): 0.0; S(9): 0.0; S(12): 0.0; T(15): 0.0; S(22): 100.0; S(26): 0.0	4.29248e+07	0	5.522e-05	16.58	0.741778	3	3118.3	2.86363	16.5012	1
High	sPDEVTLTSIVPTR	1	1	1	Q9UKS6	S1(Phospho)	0	S(1): 100.0; T(6): 0.0; T(8): 0.0; S(9): 0.0; T(13): 0.0	2.06864e+06	0	9.035e-05	41.18	0.00173373	2	1594.77	1.17715	28.3087	0
High	HGLQLGAQsPGR	1	1	1	Q8N1G0	S9(Phospho)	0	S(9): 100.0	9.60944e+06	0	0.0001584	41.17	0.00165752	2	1300.62	0.796997	11.5742	0
High	SLsSPTDNLELSLR	2	1	1	Q9Y2X7	S3(Phospho)	0	S(1): 0.7; S(3): 49.3; S(4): 49.3; T(6): 0.7; S(12): 0.0	2.79006e+06	0	5.206e-06	46.5	0.000558561	2	1611.76	-0.531066	27.1424	0
High	HGsGADSDYENTQSGDPLLGLEGK	2	1	1	Q9Y2X7	S3(Phospho)	0	S(3): 49.5; S(7): 49.5; Y(9): 0.9; T(12): 0.0; S(14): 0.0	5.21592e+06	0	2.672e-06	15.56	0.952052	3	2527.07	3.26678	22.8762	0
High	SPGSTPttPTSSQAPQK	1	1	1	P35658	T7(Phospho); T8(Phospho)	0	S(1): 1.5; S(4): 97.0; T(5): 1.5; T(7): 1.5; T(8): 98.5; T(10): 0.0; S(11): 0.0; S(12): 0.0	4.822e+06	0	8.74e-05	26.08	0.0657199	2	1831.76	2.53396	13.1708	0
High	VPAKLsPMK	1	1	1	P35658	S6(Phospho)	0	S(6): 100.0	4.38533e+06	0	0.0006597	39.72	0.00188788	2	1050.54	0.700369	11.0525	1
High	ITPPAAKPGsPQAK	2	1	1	P35658	S10(Phospho)	0	T(2): 0.0; S(10): 100.0	8.13091e+06	0.001	0.003833	14.85	0.703782	3	1442.74	-0.100011	9.36109	1
High	HSTPSNSSNPSGPPsPNSPHR	1	1	1	Q9Y5S2	S15(Phospho)	0	S(2): 0.0; T(3): 0.0; S(5): 0.0; S(7): 0.0; S(8): 0.0; S(11): 0.0; S(15): 100.0; S(18): 0.0	8.35366e+06	0	1.685e-08	40.91	0.00257886	3	2220.95	1.47741	6.70073	0
High	sVVGTPAYLAPEVLR	1	2	1	O94806	S1(Phospho)	0	S(1): 100.0; T(5): 0.0; Y(8): 0.0	3.55075e+06	0	1.25e-05	40.87	0.00169422	2	1651.85	3.21178	29.9795	0
High	VLDTSSLTQSAPAsPTNK	1	1	1	Q8N122	S14(Phospho)	0	T(4): 0.0; S(5): 0.0; S(6): 0.0; T(8): 0.0; S(10): 0.0; S(14): 98.9; T(16): 1.1	6.5579e+06	0	1.438e-06	40.81	0.00234433	2	1896.9	2.10509	19.5516	0
High	VKVDGPRsPsYGR	1	1	1	Q07955	S8(Phospho); S10(Phospho)	0	S(8): 100.0; S(10): 98.7; Y(11): 1.3	2.47577e+07	0.002	0.02582	13.09	1.02109	3	1577.69	-0.897556	9.71145	2
High	VDGPRsPSYGR	1	1	1	Q07955	S6(Phospho)	0	S(6): 100.0; S(8): 0.0; Y(9): 0.0	7.27296e+06	0.001	0.01839	25.69	0.0442429	2	1270.56	0.594155	7.84716	1
High	VQGEAVSNIQENTQTPTVQEEsEEEEVDETGVEVK	1	2	1	Q13765	S22(Phospho)	0	S(7): 0.0; T(13): 24.8; T(15): 24.8; T(17): 24.8; S(22): 24.8; T(30): 0.9	1.02941e+09	0	0.00085	14.52	1.56107	3	3940.75	3.22101	24.0523	0
High	LVEQANsPK	1	1	1	O95391	S7(Phospho)	0	S(7): 100.0	1.70417e+07	0.001	0.007731	40.48	0.00130276	2	1065.5	1.09301	7.69421	0
High	IYQyIQSR	1	2	1	Q9Y463	Y4(Phospho)	0	Y(2): 0.0; Y(4): 100.0; S(7): 0.0	8.89627e+06	0.001	0.006536	40.47	0.00156153	2	1150.53	0.814117	13.6844	0
High	LEAIItPPPAK	1	1	1	O75367	T6(Phospho)	0	T(6): 100.0	5.88695e+06	0	0.0001266	40.39	0.00143516	2	1229.65	0.628246	21.9225	0
High	LDsKTDPASNTK	1	1	1	Q15596	S3(Phospho)	0	S(3): 99.1; T(5): 0.9; S(9): 0.0; T(11): 0.0	3.0423e+06	0	2.969e-05	40.36	0.00157397	2	1356.6	-0.10963	6.65323	1
High	KVEGNFNPFAsPQK	1	1	1	Q9H6K1	S11(Phospho)	0	S(11): 100.0	8.46999e+06	0	3.415e-05	40.29	0.00251156	2	1642.76	0.178164	18.0752	1
High	SEsPPAELPSLR	2	1	1	Q14669	S3(Phospho)	0	S(1): 0.0; S(3): 100.0; S(10): 0.0	8.71544e+06	0	2.735e-06	40.2	0.00201981	2	1362.63	0.0163301	22.7027	0
High	VKPPPSPtTEGPSLQPDLAPEEAAGTQRPK	4	1	1	Q9Y2D5	T8(Phospho)	0	S(6): 25.0; T(8): 25.0; T(9): 25.0; S(13): 25.0; T(26): 0.0	1.46716e+07	0	0.0001723	13	1.29056	3	3175.57	2.22059	18.6066	2
High	TLsMIEEEIR	1	1	1	Q9Y2D5	S3(Phospho)	0	T(1): 0.0; S(3): 100.0	3.3879e+06	0	0.0001309	39.84	0.00201799	2	1300.59	0.363527	28.1147	0
High	DALGDSLQVPVsPSSTTSSR	2	1	1	Q9Y2D5	S12(Phospho)	0	S(6): 0.0; S(12): 90.9; S(14): 1.5; S(15): 1.5; T(16): 1.5; T(17): 1.5; S(18): 1.5; S(19): 1.5	1.02014e+07	0	9.442e-05	20.95	0.251905	2	2083.96	1.27476	26.9588	0
High	IAsDEEIQGTK	1	1	1	Q8WX93	S3(Phospho)	0	S(3): 100.0; T(10): 0.0	8.68807e+06	0	0.0003482	40.13	0.00153826	2	1270.56	1.06448	12.9831	0
High	QsSVSSTASVNLGDPGSTR	2	1	1	Q96RT1	S2(Phospho)	0	S(2): 50.0; S(3): 50.0; S(5): 0.0; S(6): 0.0; T(7): 0.0; S(9): 0.0; S(17): 0.0; T(18): 0.0	3.01583e+06	0	1.264e-05	40.04	0.00276442	2	1929.86	2.97072	18.3619	0
High	sDEFSLADALPEHsPAK	1	1	1	Q8NDC0	N-Term(Acetyl); S14(Phospho)	0	S(1): 0.0; S(5): 0.0; S(14): 100.0	7.84579e+07	0	1.188e-06	39.95	0.00297404	2	1935.84	-0.347059	29.232	0
High	NEEPVRsPER	1	1	1	Q92922	S7(Phospho)	0	S(7): 100.0	3.8354e+06	0.003	0.0415	33.67	0.00702292	2	1292.57	2.56973	6.39919	1
High	NEEPVRsPERR	1	1	1	Q92922	S7(Phospho)	0	S(7): 100.0	1.23055e+07	0.001	0.004922	22.9	0.129497	3	1448.66	0.187482	5.62937	2
High	KHsPsPPPPTPTESR	2	1	1	Q92922	S3(Phospho); S5(Phospho)	0	S(3): 100.0; S(5): 100.0; T(10): 0.0; T(12): 0.0; S(14): 0.0	5.22323e+07	0	1.99e-09	32.38	0.0147704	3	1774.76	0.908472	8.18247	1
High	LIRPEYAWIVQPVSGAVYDRPGAsPK	1	1	1	Q12769	S24(Phospho)	0	Y(6): 0.0; S(14): 0.0; Y(18): 1.3; S(24): 98.7	1.10802e+07	0	1.089e-07	39.91	0.00197041	3	2949.5	0.755886	26.4682	2
High	DGsLNQSSGYR	1	1	1	P06241	S3(Phospho)	0	S(3): 100.0; S(7): 0.0; S(8): 0.0; Y(10): 0.0	5.58881e+06	0	8.592e-05	39.84	0.00115166	2	1263.5	0.964045	11.0784	0
High	LSMEDSKsPPPK	4	1	1	Q9NQG5	S8(Phospho)	0	S(2): 0.0; S(6): 1.0; S(8): 99.0	1.86652e+07	0	0.0007325	29.15	0.022013	2	1395.62	0.681025	9.34088	1
High	LSmEDSKsPPPK	1	1	1	Q9NQG5	M3(Oxidation); S8(Phospho)	0	S(2): 0.0; S(6): 1.0; S(8): 99.0	6.1369e+06	0	0.0002006	36.52	0.00452372	2	1411.62	1.42187	6.14795	1
High	RGsPVPPVPER	1	1	1	Q6ZRV2	S3(Phospho)	0	S(3): 100.0	7.12096e+06	0	0.001229	25.93	0.0469697	2	1270.63	2.48712	11.6281	1
High	HGsDPAFAPGPR	1	1	1	Q6ZRV2	S3(Phospho)	0	S(3): 100.0	3.88789e+06	0	1.714e-06	38.96	0.00177245	2	1288.55	-0.226435	11.6195	0
High	EALGLGPPAAQLtPPPAPVGLR	1	1	1	Q8IY67	T13(Phospho)	0	T(13): 100.0	2.69775e+07	0	3.263e-05	17.97	0.201081	3	2202.17	-0.384929	32.3072	0
High	aADVSVTHRPPLsPK	1	1	1	Q8IY67	N-Term(Acetyl); S13(Phospho)	0	S(5): 0.0; T(7): 0.0; S(13): 100.0	5.35298e+07	0	0.0003932	39.8	0.00280107	2	1696.84	1.26967	16.9922	1
High	GIsPIVFDR	1	1	1	Q96MU7	S3(Phospho)	0	S(3): 100.0	1.97319e+07	0	0.0007159	39.67	0.0021471	2	1083.52	0.443996	25.6944	0
High	LSSESHHGGsPIHWVLPAGMSAK	4	1	1	Q96MU7	S10(Phospho)	0	S(2): 2.5; S(3): 2.5; S(5): 2.5; S(10): 92.6; S(21): 0.0	7.84756e+06	0	0.001818	13.28	1.69162	3	2465.14	0.503852	19.2198	0
High	ySPTSPTYSPTsPK	3	1	1	P24928	Y1(Phospho); S12(Phospho)	0	Y(1): 0.0; S(2): 0.0; T(4): 0.0; S(5): 97.0; T(7): 1.5; Y(8): 1.5; S(9): 0.1; T(11): 1.5; S(12): 98.5	5.87914e+06	0.005	0.06612	10.5	1.4973	2	1672.65	-1.68382	20.5222	0
High	YSPTSPTYSPtSPK	2	1	1	P24928	T11(Phospho)	0	Y(1): 0.0; S(2): 0.0; T(4): 0.0; S(5): 0.0; T(7): 24.9; Y(8): 24.9; S(9): 24.9; T(11): 24.9; S(12): 0.4	8.27957e+06	0.001	0.01438	10.21	2.34388	2	1592.69	2.07792	15.4266	0
High	YSPTsPTYSPTTPK	1	1	1	P24928	S5(Phospho)	0	Y(1): 0.0; S(2): 0.0; T(4): 0.0; S(5): 98.9; T(7): 1.1; Y(8): 0.0; S(9): 0.0; T(11): 0.0; T(12): 0.0	5.90758e+06	0	1.492e-05	39.55	0.00278957	2	1606.71	1.58838	16.6915	0
High	GEPNVSyIcSR	1	2	1	P49841	Y7(Phospho); C9(Carbamidomethyl)	0	S(6): 0.9; Y(7): 99.1; S(10): 0.0	5.762e+07	0	0.002499	39.36	0.00153538	2	1361.55	-5.55623	16.0589	0
High	TTsFAEScKPVQQPSAFGSMK	1	1	1	P49841	S3(Phospho); C8(Carbamidomethyl)	0	T(1): 2.0; T(2): 2.0; S(3): 96.0; S(7): 0.0; S(15): 0.0; S(19): 0.0	5.96054e+06	0	0.000587	15.96	0.901238	3	2368.04	0.640563	18.6491	1
High	TVTcVTVVEPEAPPsPDVLQAATHR	1	1	1	Q9P1Y6	C4(Carbamidomethyl); S15(Phospho)	0	T(1): 0.0; T(3): 0.0; T(6): 0.0; S(15): 100.0; T(23): 0.0	1.41444e+07	0	1.517e-10	39.33	0.00373962	3	2754.32	1.38967	25.9537	0
High	LsPENNQVLTK	1	1	1	Q16514	S2(Phospho)	0	S(2): 100.0; T(10): 0.0	2.1032e+06	0	0.0004825	39.3	0.00262002	2	1322.64	4.76682	15.3338	0
High	YIEIDsDEEPRGELLSLR	2	1	1	Q9NVU7	S6(Phospho)	0	Y(1): 0.0; S(6): 100.0; S(16): 0.0	2.04389e+07	0	9.757e-09	43.1	0.00172402	3	2214.04	4.82683	25.9885	1
High	LcAGIMITAsHNPK	1	1	1	Q96G03	C2(Carbamidomethyl); S10(Phospho)	0	T(8): 0.9; S(10): 99.1	7.96436e+06	0	8.16e-05	39.05	0.00296194	2	1592.73	0.417895	17.2117	0
High	VDsPTVTTTLK	1	1	1	Q07866	S3(Phospho)	0	S(3): 100.0; T(5): 0.0; T(7): 0.0; T(8): 0.0; T(9): 0.0	3.39682e+06	0	2.37e-05	39.02	0.00235591	2	1241.61	2.11648	16.6874	0
High	FKIDSNIsPK	1	1	1	Q9H501	S8(Phospho)	0	S(5): 0.0; S(8): 100.0	6.98111e+06	0.001	0.005316	31.48	0.0133353	2	1228.6	1.25529	15.2959	1
High	IDSNIsPK	1	1	1	Q9H501	S6(Phospho)	0	S(3): 0.0; S(6): 100.0	6.42625e+06	0.002	0.02244	31.85	0.00636802	2	953.434	-0.24006	11.1541	0
High	SHIAQWsPHTPPR	3	1	1	P40189	S7(Phospho)	0	S(1): 0.0; S(7): 100.0; T(10): 0.0	1.60794e+07	0	0.001061	23.08	0.125962	3	1593.73	0.319315	11.7722	0
High	QNcSQHEsSPDISHFER	2	1	1	P40189	C3(Carbamidomethyl); S8(Phospho)	0	S(4): 98.1; S(8): 1.0; S(9): 1.0; S(13): 0.0	6.88818e+06	0	4.881e-08	35.36	0.00544304	3	2137.84	0.287053	11.056	0
High	LSsSLGR	2	1	1	Q9BST9	S3(Phospho)	0	S(2): 33.3; S(3): 33.3; S(4): 33.3	1.4613e+06	0.001	0.00362	38.85	0.00191566	2	799.37	-1.56969	9.98456	0
High	LSLsPLR	1	1	1	Q66K74	S4(Phospho)	0	S(2): 0.0; S(4): 100.0	4.34548e+06	0.004	0.0497	30.69	0.00908552	2	865.454	-0.141086	21.9551	0
High	AVPMAPAPAsPGSSNDSSAR	1	1	1	Q66K74	S10(Phospho)	0	S(10): 99.2; S(13): 0.8; S(14): 0.0; S(17): 0.0; S(18): 0.0	4.55504e+06	0	1.944e-05	31.54	0.0189042	2	1949.84	-0.593986	17.3146	0
High	sASPHDVDLcLVSPcEFEHR	2	1	1	Q66K74	S1(Phospho); C10(Carbamidomethyl); C15(Carbamidomethyl)	0	S(1): 50.0; S(3): 50.0; S(13): 0.0	1.93676e+07	0	1.676e-05	17.43	0.548477	3	2435.02	0.797521	23.0415	0
High	NNPsPPPDSDLER	1	1	1	O95677	S4(Phospho)	0	S(4): 100.0; S(9): 0.0	6.4144e+06	0	9.94e-05	38.75	0.00222698	2	1517.63	2.10208	14.21	0
High	DLDRPESQsPK	1	1	1	Q8WUA4	S9(Phospho)	0	S(7): 0.0; S(9): 100.0	1.6096e+07	0	0.002119	35.11	0.00528767	2	1351.59	2.18575	8.11838	1
High	AHFNAmFQPsSPTR	3	1	1	Q8WUA4	M6(Oxidation); S10(Phospho)	0	S(10): 33.3; S(11): 33.3; T(13): 33.3	7.95872e+06	0	4.075e-05	29.17	0.0227592	2	1686.71	1.10511	14.0092	0
High	sIEDLHR	1	1	1	Q96PY5	S1(Phospho)	0	S(1): 100.0	5.16425e+06	0.001	0.005082	38.52	0.00187004	2	949.413	-0.445067	9.19035	0
High	SLsLGDKEISR	1	1	1	Q9UMZ2	S3(Phospho)	0	S(1): 0.0; S(3): 100.0; S(10): 0.0	2.56361e+06	0	0.0002409	38.5	0.00286039	2	1284.62	-0.496814	14.8131	1
High	TYsEcEDGTYSPEISWHHR	2	1	1	P48651	S3(Phospho); C5(Carbamidomethyl)	0	T(1): 1.0; Y(2): 1.0; S(3): 98.1; T(9): 0.0; Y(10): 0.0; S(11): 0.0; S(15): 0.0	8423034	0	1.537e-07	38.47	0.00295133	3	2433.95	1.05803	17.0371	0
High	REsLGLESK	1	1	1	Q96BH1	S3(Phospho)	0	S(3): 100.0; S(8): 0.0	3.47844e+06	0.002	0.02668	38.24	0.00262445	2	1098.52	1.62885	9.54362	1
High	SRsDIDVNAAAGAK	1	1	1	O75122	S3(Phospho)	0	S(1): 0.9; S(3): 99.1	9.27932e+06	0	2.148e-07	38.16	0.00326135	2	1454.67	1.27904	10.5604	1
High	PLKPLsPLR	1	1	1	O60825	S6(Phospho)	0	S(6): 100.0	8.26575e+06	0	0.000927	38.04	0.00232414	2	1100.62	0.256376	15.8933	1
High	LTRPAAsPAVGEK	1	1	1	Q8N2M8	S7(Phospho)	0	T(2): 0.0; S(7): 100.0	3.28365e+06	0	0.0002706	31.52	0.01427	2	1376.7	2.02099	9.52838	1
High	KIsPPSYAR	1	1	1	Q8N2M8	S3(Phospho)	0	S(3): 100.0; S(6): 0.0; Y(7): 0.0	8.50423e+06	0.002	0.02048	32.23	0.0104423	2	1098.53	0.0902356	11.3337	1
High	SAsASHQADIK	1	1	1	Q14739	S3(Phospho)	0	S(1): 0.0; S(3): 100.0; S(5): 0.0	1.97621e+07	0	0.001602	38.02	0.00231909	2	1194.52	1.60154	5.37428	0
High	SSsFSLPSR	1	1	1	Q14153	S3(Phospho)	0	S(1): 0.0; S(2): 0.0; S(3): 100.0; S(5): 0.0; S(8): 0.0	1.8521e+06	0	0.001379	38	0.00175131	2	1047.45	0.0275836	17.9091	0
High	ALPSLNTGSSsPR	1	1	1	O14545	S11(Phospho)	0	S(4): 0.0; T(7): 0.0; S(9): 98.6; S(10): 0.7; S(11): 0.7	5.04643e+07	0	4.032e-06	37.99	0.00332801	2	1366.64	0.882802	17.7344	0
High	TPIsPLK	1	1	1	Q9NQW6	S4(Phospho)	0	T(1): 0.0; S(4): 100.0	6.80071e+06	0.001	0.00889	37.98	0.00204599	2	835.433	0.0124677	15.7755	0
High	SPSsKPSLAVAVDSAPEVAVK	7	1	1	O60508	S4(Phospho)	0.0263	S(1): 0.5; S(3): 49.5; S(4): 49.5; S(7): 0.5; S(14): 0.0	6.29092e+06	0	4.29e-09	36.61	0.00528221	3	2119.07	0.278681	22.1345	1
High	aTEIGsPPR	1	1	1	Q9C0J8	N-Term(Acetyl); S6(Phospho)	0	T(2): 0.0; S(6): 100.0	0	0	0.001146	37.85	0.00212456	2	1049.47	0.919948	21.8464	0
High	SFGsPNR	1	1	1	P50613	S4(Phospho)	0	S(1): 0.0; S(4): 100.0	9.38048e+06	0.001	0.01863	37.85	0.001657	2	844.335	0.223023	7.73768	0
High	sPPLPAVIR	1	1	1	Q9Y6X9	S1(Phospho)	0	S(1): 100.0	1.89366e+07	0	0.0008849	37.85	0.00252651	2	1029.55	0.050221	23.5726	0
High	sIDPDSIQSALLASGLGSK	1	1	1	A3KN83	S1(Phospho)	0	S(1): 100.0; S(6): 0.0; S(9): 0.0; S(14): 0.0; S(18): 0.0	5.99107e+06	0	6.543e-07	37.78	0.00509344	2	1938.94	0.247651	35.31	0
High	LQAKEsPQR	1	1	1	Q15061	S6(Phospho)	0	S(6): 100.0	1.89515e+07	0.001	0.01609	37.77	0.00325027	2	1136.54	-1.02495	5.24896	1
High	sETAPAAPAAAPPAEK	1	1	1	P16403	N-Term(Acetyl); S1(Phospho)	0	S(1): 100.0; T(3): 0.0	0	0.001	0.004465	14.59	0.912282	2	1600.73	4.5594	21.0561	0
High	AVVVsPKEENK	1	1	1	O75909	S5(Phospho)	0	S(5): 100.0	1.63401e+07	0	0.0001495	37.47	0.00377818	2	1279.63	0.874051	7.85407	1
High	KPsPQPsSPR	2	1	1	O75909	S3(Phospho); S7(Phospho)	0	S(3): 100.0; S(7): 50.0; S(8): 50.0	0	0.007	0.07789	14.65	0.485016	2	1240.51	1.50297	6.52942	1
High	INHTVILDDPFDDPPDLLIPDRsPEPTR	1	1	1	Q8WUA2	S23(Phospho)	0	T(4): 0.0; S(23): 100.0; T(27): 0.0	2.00105e+07	0	4.563e-09	37.45	0.00517175	3	3277.58	0.940765	30.3803	1
High	VADPDHDHTGFLTEyVATR	2	1	1	P28482	Y15(Phospho)	0	T(9): 0.0; T(13): 0.0; Y(15): 100.0; T(18): 0.0	1.04821e+08	0	2.319e-10	38.14	0.00500285	3	2223.97	0.688343	18.6829	0
High	VADPDHDHTGFLtEyVATR	1	1	1	P28482	T13(Phospho); Y15(Phospho)	0	T(9): 0.0; T(13): 100.0; Y(15): 100.0; T(18): 0.0	3.93782e+07	0	5.396e-06	28.12	0.0420884	3	2303.94	1.39649	21.616	0
High	DEILPTtPISEQK	1	1	1	P23396	T7(Phospho)	0	T(6): 0.0; T(7): 100.0; S(10): 0.0	1.25028e+08	0	0.0001365	37.36	0.00494029	2	1550.74	0.328187	24.4134	0
High	LSDsPSmGR	1	1	1	O60245	S4(Phospho); M7(Oxidation)	0	S(2): 0.0; S(4): 99.0; S(6): 1.0	2.00505e+06	0.005	0.06216	20.24	0.0936775	2	1045.4	-0.61461	7.23823	0
High	LSDsPSMGR	1	1	1	O60245	S4(Phospho)	0	S(2): 0.0; S(4): 100.0; S(6): 0.0	7.52905e+06	0.001	0.006165	37.34	0.00157749	2	1029.41	0.36526	10.9429	0
High	SSSPLPTVQLHPQsPTAGK	2	1	1	O60245	S14(Phospho)	0	S(1): 0.0; S(2): 0.0; S(3): 0.0; T(7): 0.0; S(14): 98.6; T(16): 1.4	1.08814e+07	0	0.001046	16.28	0.622911	2	2011.99	4.66601	19.1134	0
High	SSSPLPTVQLHPQsPTAGKK	1	1	1	O60245	S14(Phospho)	0	S(1): 0.0; S(2): 0.0; S(3): 0.0; T(7): 0.0; S(14): 98.3; T(16): 1.7	5.15025e+06	0	0.0005782	12.42	1.21146	3	2140.08	-0.325011	15.4647	1
High	DKEIsPSVTK	1	1	1	Q8N488	S5(Phospho)	0	S(5): 100.0; S(7): 0.0; T(9): 0.0	9.52191e+06	0	0.002925	37.33	0.00399442	2	1183.56	0.66466	9.4144	1
High	IYHLPDAEsDEDEDFKEQTR	3	1	1	Q15019	S9(Phospho)	0	Y(2): 0.0; S(9): 100.0; T(19): 0.0	5.11527e+08	0	2.789e-06	17.46	0.583288	3	2517.05	1.43544	17.9239	1
High	EDsGTFSLGK	1	1	1	O75569	S3(Phospho)	0	S(3): 98.8; T(5): 1.2; S(7): 0.0	2.19839e+06	0	0.0008488	37.16	0.00237502	2	1120.46	-0.112655	18.2987	0
High	LQSVQATGPsSPGR	2	1	1	P23508	S10(Phospho)	0	S(3): 0.0; T(7): 0.4; S(10): 49.8; S(11): 49.8	2.68648e+06	0	1.234e-05	37.15	0.00466461	2	1464.69	2.12552	12.4152	0
High	APsPPLSQVFQTR	1	1	1	Q9NRA8	S3(Phospho)	0	S(3): 100.0; S(7): 0.0; T(12): 0.0	4.70197e+06	0	0.003013	29.48	0.0265455	2	1507.74	5.09006	26.8162	0
High	sSPVESLKK	2	1	1	Q9NRA8	S1(Phospho)	0	S(1): 50.0; S(2): 50.0; S(6): 0.0	4.01581e+06	0.001	0.006543	29.25	0.0251368	2	1054.52	1.5539	7.37182	1
High	VVPGQFDDADsSDSENR	2	1	1	Q9BRS2	S11(Phospho)	0	S(11): 49.8; S(12): 49.8; S(14): 0.4	1.1599e+07	0	3.777e-07	37.06	0.00328637	2	1917.75	1.59822	17.3454	0
High	LLEDsEEsSEETVSR	1	1	1	O60231	S5(Phospho); S8(Phospho)	0	S(5): 100.0; S(8): 98.6; S(9): 1.4; T(12): 0.0; S(14): 0.0	6.4281e+06	0	0.0002842	36.9	0.00289927	2	1869.7	-2.43081	21.5593	0
High	SRNsPLLER	1	1	1	Q7KZI7	S4(Phospho)	0	S(1): 0.0; S(4): 100.0	4.67435e+06	0.001	0.01713	36.88	0.00376388	2	1151.56	1.60749	8.27705	1
High	VPAsPLPGLER	1	1	1	Q7KZI7	S4(Phospho)	0	S(4): 100.0	4.87417e+06	0	0.002015	23.41	0.0978199	2	1215.61	-0.244808	21.7003	0
High	GRAsPGGVSTSSSDGK	1	1	1	P54259	S4(Phospho)	0	S(4): 100.0; S(9): 0.0; T(10): 0.0; S(11): 0.0; S(12): 0.0; S(13): 0.0	3.13088e+06	0	3.204e-06	36.74	0.00460744	2	1529.66	1.75237	6.14108	1
High	AsPGGVSTSSSDGK	1	1	1	P54259	S2(Phospho)	0	S(2): 100.0; S(7): 0.0; T(8): 0.0; S(9): 0.0; S(10): 0.0; S(11): 0.0	0	0	0.001801	14.9	0.448177	2	1316.54	0.205488	7.41018	0
High	ALsLGTIPSLTR	1	1	1	Q5SNT2	S3(Phospho)	0	S(3): 100.0; T(6): 0.0; S(9): 0.0; T(11): 0.0	3.3497e+06	0	1.681e-05	36.71	0.00435141	2	1308.69	-0.31342	29.7653	0
High	ELEHNAEEtYGENDENTDDKNNDGEEQEVR	1	1	1	O00461	T9(Phospho)	0	T(9): 49.6; Y(10): 49.6; T(17): 0.9	1.46625e+07	0	2.006e-08	36.71	0.00572723	3	3602.39	-1.07372	11.9178	1
High	DSDYVYPsLESDEDNPIFK	2	1	1	O75151	S8(Phospho)	0	S(2): 0.0; Y(4): 0.0; Y(6): 0.0; S(8): 50.0; S(11): 50.0	6.4757e+06	0	0.0001371	13.54	1.33662	2	2312.95	1.99146	33.6345	0
High	EsASPTIPNLDLLEAHTK	2	1	1	O75151	S2(Phospho)	0	S(2): 97.0; S(4): 1.5; T(6): 1.5; T(17): 0.0	3.35097e+06	0	3.279e-05	36.69	0.00616081	3	2015.97	-0.338616	26.9167	0
High	LGEAsDSELADADK	1	1	1	Q5SW79	S5(Phospho)	0	S(5): 98.6; S(7): 1.4	2.01335e+06	0	0.0002042	26.8	0.0360404	2	1500.61	0.0365124	16.4604	0
High	sDSEATISR	1	1	1	Q5SW79	S1(Phospho)	0	S(1): 100.0; S(3): 0.0; T(6): 0.0; S(8): 0.0	1.02627e+06	0.001	0.007153	33.62	0.00351953	2	1045.42	3.07907	8.72426	0
High	ILGSAsPEEEQEKPILDRPTR	1	1	1	Q7Z422	S6(Phospho)	0	S(4): 1.6; S(6): 98.4; T(20): 0.0	1.73642e+07	0	4.728e-07	31.7	0.0173077	3	2445.21	3.77376	16.5669	2
High	SKsPPKVPIVIQDDSLPAGPPPQIR	3	1	1	Q7Z422	S3(Phospho)	0	S(1): 0.0; S(3): 100.0; S(15): 0.0	5.27859e+07	0	6.677e-09	16.49	0.19073	3	2716.45	1.11323	24.2076	2
High	sPPKVPIVIQDDSLPAGPPPQIR	1	1	1	Q7Z422	S1(Phospho)	0	S(1): 100.0; S(13): 0.0	2.96513e+07	0	3.773e-05	13.75	0.56929	3	2501.32	0.276064	27.8162	1
High	RPDDVPLSLsPSKR	1	1	1	Q9UFC0	S10(Phospho)	0	S(8): 0.0; S(10): 100.0; S(12): 0.0	9.87854e+06	0	1.175e-05	36.67	0.00512362	3	1646.83	0.311535	14.4535	2
High	EAPGsPPLSPR	1	1	1	Q86UU0	S5(Phospho)	0	S(5): 100.0; S(9): 0.0	5.51232e+06	0	0.001679	20.01	0.207023	2	1187.54	-0.608673	15.6756	0
High	ANQIsPSNSSLK	1	1	1	Q86UU0	S5(Phospho)	0	S(5): 98.8; S(7): 0.0; S(9): 0.0; S(10): 1.1	3.19232e+06	0.001	0.004863	11.49	1.41561	2	1325.61	0.50306	12.4032	0
High	SVsVDSGEQR	1	1	1	Q86UU0	S3(Phospho)	0	S(1): 0.0; S(3): 100.0; S(6): 0.0	1.82074e+06	0	5.346e-05	36.55	0.00286596	2	1143.47	1.17319	8.40659	0
High	LQQTVPADAsPDSK	1	1	1	Q9NS56	S10(Phospho)	0	T(4): 0.0; S(10): 100.0; S(13): 0.0	5.85489e+06	0	2.489e-05	36.43	0.00543748	2	1536.69	-1.63618	12.9378	0
High	SGVSsDNEDDDDEEDGNYLHPSLFASK	2	1	1	Q12872	S5(Phospho)	0	S(1): 0.0; S(4): 1.7; S(5): 98.3; Y(18): 0.0; S(22): 0.0; S(26): 0.0	2.09407e+07	0	7.792e-10	36.42	0.00578067	3	3022.18	1.84591	24.6367	0
High	KSPSGPVKsPPLsPVGTTPVK	1	1	1	Q9BVC5	S9(Phospho); S13(Phospho)	0	S(2): 0.2; S(4): 0.2; S(9): 99.5; S(13): 99.5; T(17): 0.2; T(18): 0.2	5.69966e+06	0	0.0004592	20.7	0.210231	3	2220.12	3.97637	17.2477	2
High	KSPSGPVKsPPLSPVGTTPVK	1	1	1	Q9BVC5	S9(Phospho)	0	S(2): 49.3; S(4): 1.4; S(9): 49.3; S(13): 0.0; T(17): 0.0; T(18): 0.0	2.67376e+06	0	5.37e-05	18.42	0.153951	3	2140.15	3.16577	15.3235	2
High	KLsNSSSSVSPLILSSNLPVNNK	3	1	1	Q9BVC5	S3(Phospho)	0.0278	S(3): 96.7; S(5): 1.6; S(6): 1.6; S(7): 0.0; S(8): 0.0; S(10): 0.0; S(15): 0.0; S(16): 0.0	7.63834e+06	0	1.667e-06	34.87	0.0065819	3	2465.27	1.93208	25.1508	1
High	KNsItEISDNEDDLLEYHR	3	1	1	Q86UU1	S3(Phospho); T5(Phospho)	0	S(3): 98.9; T(5): 50.5; S(8): 50.5; Y(17): 0.0	3.31255e+06	0.001	0.006453	12.27	1.78471	3	2451.01	-0.0859846	22.5901	1
High	KLsSGDLR	1	1	1	Q86UU1	S3(Phospho)	0	S(3): 100.0; S(4): 0.0	3.66049e+06	0.009	0.1022	36.36	0.00387271	2	955.461	0.554753	7.82599	1
High	KNsITEISDNEDDLLEYHR	1	1	1	Q86UU1	S3(Phospho)	0	S(3): 98.7; T(5): 1.3; S(8): 0.0; Y(17): 0.0	4.21317e+06	0	7.131e-06	24.54	0.124628	3	2371.05	0.280952	20.3705	1
High	KLsDASDER	1	1	1	Q658Y4	S3(Phospho)	0	S(3): 99.2; S(6): 0.8	1801729	0	0.001208	36.34	0.00312408	2	1100.46	0.841395	5.32572	1
High	RLNHsPPQSSSR	1	1	1	Q5T8P6	S5(Phospho)	0	S(5): 100.0; S(9): 0.0; S(10): 0.0; S(11): 0.0	3.27152e+06	0	4.817e-06	24.3	0.081552	3	1445.66	-0.0265633	5.15765	1
High	LNHsPPQSSSR	1	1	1	Q5T8P6	S4(Phospho)	0	S(4): 100.0; S(8): 0.0; S(9): 0.0; S(10): 0.0	7.18409e+06	0	8.181e-05	36.32	0.00462025	3	1289.56	-0.349253	5.92428	0
High	sGDHLHNDsQIEADFR	1	1	1	P11387	N-Term(Acetyl); S9(Phospho)	0	S(1): 0.0; S(9): 100.0	5.70432e+06	0	1.746e-05	36.14	0.00543598	2	1962.8	-0.906459	17.9349	0
High	SLVHEVGKPPQDVtDDSPPSK	2	1	1	Q96T58	T14(Phospho)	0	S(1): 0.0; T(14): 50.0; S(17): 50.0; S(20): 0.0	9.30614e+06	0	0.0004223	13.78	1.37783	3	2312.09	2.9654	13.7925	1
High	ESGVVAVsPEKsESPQKEDGLSSQLK	2	1	1	Q96T58	S8(Phospho); S12(Phospho)	0	S(2): 0.0; S(8): 66.7; S(12): 66.7; S(14): 66.7; S(22): 0.0; S(23): 0.0	6.09252e+06	0	0.0001658	11.35	3.07786	3	2875.3	1.34333	18.4262	2
High	NVDAAVsPR	1	1	1	Q96T58	S7(Phospho)	0	S(7): 100.0	2.30558e+06	0.002	0.02756	19.3	0.162136	2	1008.45	0.0447255	10.6704	0
High	RPQsPGAsPSQAER	1	1	1	Q96T58	S4(Phospho); S8(Phospho)	0	S(4): 100.0; S(8): 100.0; S(10): 0.0	1.53001e+06	0	0.0001081	20.22	0.177288	3	1627.66	0.31136	7.78698	1
High	SQsPVHLR	1	1	1	Q96T58	S3(Phospho)	0	S(1): 0.0; S(3): 100.0	2.87903e+06	0.002	0.02137	30.65	0.00972923	2	1003.47	1.87677	7.97413	0
High	HGSFHEDEDPIGsPR	1	1	1	Q96T58	S13(Phospho)	0	S(3): 0.0; S(13): 100.0	3.66739e+06	0	1.363e-06	26.76	0.0444921	3	1759.71	0.315691	11.6892	0
High	ALQAPHSPsK	1	1	1	Q96AQ6	S9(Phospho)	0	S(7): 0.0; S(9): 100.0	3.35547e+06	0	0.00257	36.03	0.00449027	2	1115.53	0.912569	6.65499	0
High	TQEDEEEIStSPGVSEFVSDAFDAcNLNQEDLR	5	1	1	Q96A49	T10(Phospho); C25(Carbamidomethyl)	0	T(1): 16.7; S(9): 16.7; T(10): 16.7; S(11): 16.7; S(15): 16.7; S(19): 16.7	4.17004e+06	0.002	0.02393	18.82	0.483546	3	3811.56	-6.44858	36.7323	0
High	tPPVVIK	1	1	1	Q96A49	T1(Phospho)	0	T(1): 100.0	3.15657e+07	0.006	0.07252	35.98	0.00325529	2	833.453	-0.339319	16.1221	0
High	VVPEDGsPEKR	1	1	1	Q02040	S7(Phospho)	0	S(7): 100.0	2.50517e+07	0.005	0.07075	35.91	0.00432116	2	1292.59	1.33153	6.96475	1
High	APsPTKPLR	1	1	1	Q96FF9	S3(Phospho)	0	S(3): 100.0; T(5): 0.0	0	0.001	0.005321	35.74	0.00473367	2	1046.54	0.00383138	8.17732	1
High	GPDEAMEDGEEGsDDEAEWVVTK	1	1	1	Q9NZN4	S13(Phospho)	0	S(13): 100.0; T(22): 0.0	1.44097e+07	0	2.491e-07	20.22	0.182991	2	2574.98	2.24838	25.7304	0
High	GPDEAmEDGEEGsDDEAEWVVTK	2	1	1	Q9NZN4	M6(Oxidation); S13(Phospho)	0	S(13): 100.0; T(22): 0.0	1.50758e+07	0	1.049e-05	29.73	0.0177712	2	2590.96	-1.07966	23.7895	0
High	VPLAPITDPQQLQLsPLK	2	1	1	P31350	S15(Phospho)	0	T(7): 0.0; S(15): 100.0	1.11507e+08	0	6.656e-05	22	0.0753994	2	2038.09	-2.61276	32.799	0
High	DSDAGSStPTTSTR	1	1	1	P51532	T8(Phospho)	0	S(2): 1.9; S(6): 1.9; S(7): 1.9; T(8): 90.2; T(10): 1.9; T(11): 1.9; S(12): 0.1; T(13): 0.1	1.02523e+06	0.002	0.02996	10.89	0.904322	2	1462.57	1.32941	7.62184	0
High	KAENAEGQTPAIGPDGEPLDEtSQMSDLPVK	3	1	1	P51532	T22(Phospho)	0	T(9): 0.0; T(22): 33.3; S(23): 33.3; S(26): 33.3	1.2624e+07	0	3.882e-06	19.41	0.442741	3	3304.5	1.93324	24.6857	1
High	GRPPAEKLsPNPPNLTK	1	1	1	P51532	S9(Phospho)	0	S(9): 100.0; T(16): 0.0	2.8253e+07	0	2.49e-10	36.78	0.00384106	3	1895.97	-0.00535839	12.783	2
High	KIPDPDsDDVSEVDAR	1	1	1	P51532	S7(Phospho)	0	S(7): 100.0; S(11): 0.0	2.99713e+06	0.001	0.005474	11.73	1.551	2	1837.79	2.4367	16.2766	1
High	KRDsDAGSSTPTTSTR	1	1	1	P51532	S4(Phospho)	0	S(4): 100.0; S(8): 0.0; S(9): 0.0; T(10): 0.0; T(12): 0.0; T(13): 0.0; S(14): 0.0; T(15): 0.0	3.67598e+06	0	0.0005931	16.78	0.557269	3	1746.77	1.28927	5.11732	2
High	LsPNPPNLTK	1	1	1	P51532	S2(Phospho)	0	S(2): 100.0; T(9): 0.0	4.28249e+06	0.004	0.05268	11.54	1.31523	2	1160.57	0.3606	17.3517	0
High	LPDsPALAK	1	1	1	Q13586	S4(Phospho)	0	S(4): 100.0	2.94432e+06	0	0.001852	35.67	0.00395688	2	991.486	-0.402425	15.6907	0
High	PSLFVLsPIKEPAK	1	1	1	Q8N3V7	S7(Phospho)	0	S(2): 0.0; S(7): 100.0	1.87119e+06	0	0.0003218	27.52	0.024516	2	1605.87	0.702615	25.6781	1
High	DRAsPAAAEEVVPEWAScLK	1	1	1	Q8N3V7	S4(Phospho); C18(Carbamidomethyl)	0	S(4): 100.0; S(17): 0.0	8.53454e+06	0	1.569e-06	31.32	0.0252732	3	2266.02	1.3176	27.2944	1
High	AAsPAKPSSLDLVPNLPK	4	1	1	Q8N3V7	S3(Phospho)	0	S(3): 100.0; S(8): 0.0; S(9): 0.0	1.08327e+07	0	3.314e-05	17.82	0.253576	3	1884.99	1.02295	23.8748	1
High	aALHTTPDsPAAQLER	1	1	1	A6NFI3	N-Term(Acetyl); S9(Phospho)	0	T(5): 0.0; T(6): 0.0; S(9): 100.0	1.19508e+07	0	3.382e-08	35.59	0.00732933	2	1799.83	0.473517	21.7202	0
High	GDsPELKPR	1	1	1	Q5VWQ8	S3(Phospho)	0	S(3): 100.0	3.84877e+06	0	0.001713	35.57	0.00434025	2	1078.49	0.947417	7.84888	1
High	LEGVDGGQsPR	1	1	1	O00418	S9(Phospho)	0	S(9): 100.0	5.83486e+06	0	7.426e-05	29.78	0.0157268	2	1194.52	0.358495	11.555	0
High	KYEsDEDSLGSSGR	1	1	1	O00418	S4(Phospho)	0	Y(2): 0.0; S(4): 100.0; S(8): 0.0; S(11): 0.0; S(12): 0.0	0	0	0.001507	30.08	0.0158552	2	1609.64	2.08033	8.95664	1
High	RSsTVAPAQPDGAESEWTDVETR	2	1	1	Q02241	S3(Phospho)	0	S(2): 98.6; S(3): 1.4; T(4): 0.0; S(15): 0.0; T(18): 0.0; T(22): 0.0	1.2643e+07	0	7.985e-07	35.39	0.0105799	3	2569.12	1.22842	19.2547	1
High	DGLAPEKTsPDRDK	2	1	1	Q7L4I2	S9(Phospho)	0	T(8): 0.8; S(9): 99.2	3.11889e+07	0.001	0.005589	34.25	0.00979056	2	1608.73	2.28746	7.46954	2
High	EQSEVSVsPR	1	1	1	Q7L4I2	S8(Phospho)	0	S(3): 0.0; S(6): 0.0; S(8): 100.0	2.89834e+07	0.001	0.008537	26.77	0.0362902	2	1197.52	0.955678	11.7244	0
High	AVPIGtPPK	1	1	1	Q86TB9	T6(Phospho)	0	T(6): 100.0	5.68825e+06	0	8.424e-05	35.12	0.00579844	2	959.496	0.116889	15.3183	0
High	STsPIIGSPPVR	3	1	1	Q86TB9	S3(Phospho)	0	S(1): 0.0; T(2): 0.0; S(3): 100.0; S(8): 0.0	1.30084e+07	0	0.0005503	25.78	0.0458458	2	1290.65	0.591535	19.8039	0
High	EEAsDDDMEGDEAVVR	1	1	1	O75643	S4(Phospho)	0	S(4): 100.0	4.10352e+06	0	4.089e-05	35.3	0.00311353	2	1846.67	1.81424	17.6675	0
High	LSSLRAStsKsESSQK	1	1	1	P62753	T8(Phospho); S9(Phospho); S11(Phospho)	0	S(2): 40.3; S(3): 40.3; S(7): 40.3; T(8): 39.9; S(9): 39.9; S(11): 99.2; S(13): 0.2; S(14): 0.0	5.74091e+06	0.008	0.09496	11.78	1.437	2	1935.79	0.734045	9.90512	2
High	GLLSDsMTDVPVDTGVAAR	1	1	1	O43399	S6(Phospho)	0	S(4): 2.4; S(6): 95.3; T(8): 2.4; T(14): 0.0	1.38454e+06	0	0.003024	20.7	0.248107	2	1983.91	2.0603	29.3875	0
High	mDSAGQDINLNsPNK	1	1	1	O43399	N-Term(Acetyl); S12(Phospho)	0	S(3): 0.0; S(12): 100.0	1.2325e+07	0	9.789e-06	27.18	0.0440279	2	1725.71	-0.933408	26.4517	0
[truncated: 392 more rows]

## Sheet: Fe3O4@TiTA-Replicate 2
A2	Sequence	# PSMs	# Proteins	# Protein Groups	Protein Group Accessions	Modifications	ΔCn	phosphoRS Site Probabilities	Area	q-Value	PEP	IonScore	Exp Value	Charge	MH+ [Da]	ΔM [ppm]	RT [min]	# Missed Cleavages
High	IEDVGsDEEDDSGK	1	2	1	P08238	S6(Phospho)	0	S(6): 100.0; S(12): 0.0	3.1139e+07	0	3.142e-10	107.14	2.2121e-10	2	1574.57	0.176676	10.3794	0
High	IEDVGsDEEDDSGKDK	2	2	1	P08238	S6(Phospho)	0	S(6): 100.0; S(12): 0.0	9.33123e+07	0	2.053e-12	114.58	5.01606e-11	2	1817.7	1.24309	7.56142	1
High	IEDVGsDEEDDSGKDKK	2	2	1	P08238	S6(Phospho)	0	S(6): 100.0; S(12): 0.0	2.82255e+08	0	3.826e-11	103.12	1.15544e-09	2	1945.79	1.97717	5.67885	2
High	RVPSPtPAPK	2	1	1	Q9UQ35	T6(Phospho)	0	S(4): 100.0; T(6): 0.0	7.49761e+07	0	0.01087	22.86	0.0820407	3	1129.58	1.22501	6.69486	1
High	QGSItSPQANEQSVtPQR	2	1	1	Q9UQ35	T5(Phospho); T15(Phospho)	0	S(3): 1.0; T(5): 49.0; S(6): 49.0; S(13): 3.0; T(15): 98.0	7.62671e+06	0	0.001691	10.54	2.44172	2	2087.88	2.40712	16.514	0
High	AQtPPGPSLSGSKsPcPQEK	1	1	1	Q9UQ35	T3(Phospho); S14(Phospho); C16(Carbamidomethyl)	0	T(3): 100.0; S(8): 0.0; S(10): 1.6; S(12): 1.6; S(14): 96.7	2.08225e+07	0.003	0.03482	16.87	0.606488	2	2212.94	2.19772	13.0253	1
High	SRtSPAPWK	2	1	1	Q9UQ35	T3(Phospho)	0	S(1): 0.5; T(3): 49.7; S(4): 49.7	3.35842e+06	0.005	0.07482	15.36	0.449706	2	1109.51	0.643287	7.64433	1
High	AQtPPGPSLSGSK	1	1	1	Q9UQ35	T3(Phospho)	0	T(3): 100.0; S(8): 0.0; S(10): 0.0; S(12): 0.0	2.65102e+07	0	0.0004696	23.1	0.0964864	2	1306.61	1.58604	12.0768	0
High	SRtPPSAPSQSR	1	1	1	Q9UQ35	T3(Phospho)	0	S(1): 0.0; T(3): 100.0; S(6): 0.0; S(9): 0.0; S(11): 0.0	1.88737e+07	0	0.0001584	48.86	0.000251583	2	1350.62	1.38255	5.48608	1
High	GEGDAPFSEPGTTStQRPsSPETATK	1	1	1	Q9UQ35	T15(Phospho); S19(Phospho)	0	S(8): 0.0; T(12): 0.0; T(13): 0.0; S(14): 0.0; T(15): 0.0; S(19): 99.9; S(20): 100.0; T(23): 0.0; T(25): 0.0	1.97091e+07	0	2.183e-05	11.36	2.36158	3	2795.15	1.21284	17.1187	1
High	tSPPLLDR	2	1	1	Q9UQ35	T1(Phospho)	0	T(1): 50.0; S(2): 50.0	1.99902e+08	0	0.004144	30.08	0.0127627	2	978.466	0.11604	16.2265	0
High	tPTAPAVNLAGAR	1	1	1	Q9UQ35	T1(Phospho)	0	T(1): 100.0; T(3): 0.0	7.08065e+06	0	2.187e-06	59.21	2.68688e-05	2	1318.65	0.536137	18.3128	0
High	KPIDSLRDsR	1	1	1	Q9UQ35	S9(Phospho)	0	S(5): 0.0; S(9): 100.0	1.87164e+07	0	0.001643	41.77	0.00129063	2	1266.63	5.71336	5.75303	2
High	QSHSGSIsPYPK	3	1	1	Q9UQ35	S8(Phospho)	0	S(2): 0.0; S(4): 0.0; S(6): 1.0; S(8): 99.0; Y(10): 0.0	2.18054e+07	0	0.0002377	36.45	0.00434812	2	1367.6	-1.14838	7.42873	0
High	HSLSGSsPGMK	3	1	1	Q9UQ35	S7(Phospho)	0	S(2): 0.0; S(4): 0.0; S(6): 1.0; S(7): 99.0	6.61917e+06	0	0.0002724	35.59	0.00343692	2	1167.49	0.4572	5.62042	0
High	GEFSAsPmLK	1	1	1	Q9UQ35	S6(Phospho); M8(Oxidation)	0	S(4): 0.0; S(6): 100.0	1.50314e+07	0	0.003931	17.56	0.258697	2	1162.49	2.07061	15.3819	0
High	GEFSAsPMLK	1	1	1	Q9UQ35	S6(Phospho)	0	S(4): 0.0; S(6): 100.0	4.06387e+07	0	4.966e-05	62.01	1.01036e-05	2	1146.49	-0.0998411	19.8679	0
High	ENSFGsPLEFR	1	1	1	Q9UQ35	S6(Phospho)	0	S(3): 0.0; S(6): 100.0	3.67435e+07	0	4.098e-07	62.26	9.06296e-06	2	1362.57	0.392945	24.2326	0
High	QSHSEsPSLQSK	1	1	1	Q9UQ35	S6(Phospho)	0	S(2): 0.0; S(4): 0.0; S(6): 100.0; S(8): 0.0; S(11): 0.0	2.55614e+07	0	1.19e-06	69.21	1.96718e-06	2	1394.6	0.59254	5.41825	0
High	ELSNsPLRENSFGsPLEFR	7	1	1	Q9UQ35	S5(Phospho); S14(Phospho)	0	S(3): 49.6; S(5): 49.6; S(11): 0.8; S(14): 100.0	1.26305e+07	0	0.0003974	24.72	0.117376	3	2339.02	2.69197	27.9591	1
High	SSGHsSSELsPDAVEK	3	1	1	Q9UQ35	S5(Phospho); S10(Phospho)	0	S(1): 0.0; S(2): 0.0; S(5): 97.3; S(6): 2.7; S(7): 2.7; S(10): 97.3	8.73999e+06	0	0.0006953	27.19	0.0280748	2	1776.67	1.08223	12.608	0
High	HGGsPQPLATTPLSQEPVNPPSEASPtR	1	1	1	Q9UQ35	S4(Phospho); T27(Phospho)	0	S(4): 100.0; T(10): 0.0; T(11): 0.0; S(14): 0.0; S(22): 0.0; S(25): 50.0; T(27): 50.0	1.74377e+08	0	2.031e-11	40.57	0.00358255	3	3012.35	1.56629	23.5486	0
High	RRPsPQPsPR	1	1	1	Q9UQ35	S4(Phospho); S8(Phospho)	0	S(4): 100.0; S(8): 100.0	3.60581e+07	0.001	0.01419	15.15	0.57738	3	1337.59	-0.315091	5.25987	2
High	AGMsSNQSIsSPVLDAVPR	7	1	1	Q9UQ35	S4(Phospho); S10(Phospho)	0	S(4): 33.3; S(5): 33.3; S(8): 33.3; S(10): 50.1; S(11): 50.1	7.96661e+06	0	1.744e-05	47.55	0.000479913	2	2075.89	3.08053	30.2611	0
High	AIIsPR	1	1	1	Q9UQ35	S4(Phospho)	0	S(4): 100.0	2.62363e+07	0.009	0.1134	35.61	0.00283033	2	736.376	0.249302	12.1124	0
High	SGMsPEQSR	1	1	1	Q9UQ35	S4(Phospho)	0	S(1): 0.0; S(4): 100.0; S(8): 0.0	2.59484e+07	0	9.278e-05	56.77	1.47264e-05	2	1058.4	0.886867	6.18356	0
High	PSMsPTPLDR	1	1	1	Q9UQ35	S4(Phospho)	0	S(2): 0.0; S(4): 100.0; T(6): 0.0	1.57653e+07	0	0.0002446	54.25	4.05904e-05	2	1180.51	0.741824	15.2467	0
High	EQNsALPTSSQDEELMEVVEK	1	1	1	Q9UQ35	S4(Phospho)	0	S(4): 93.3; T(8): 2.2; S(9): 2.2; S(10): 2.2	6.92184e+06	0.003	0.05148	10.56	3.19525	3	2443.07	6.14598	29.5982	0
High	ARsRtPPSAPSQSR	1	1	1	Q9UQ35	S3(Phospho); T5(Phospho)	0	S(3): 100.0; T(5): 100.0; S(8): 0.0; S(11): 0.0; S(13): 0.0	3.24895e+07	0	0.0001329	25.66	0.0611199	3	1657.72	0.334392	5.47064	2
High	SRsVsPcSNVESR	1	1	1	Q9UQ35	S3(Phospho); S5(Phospho); C7(Carbamidomethyl)	0	S(1): 0.0; S(3): 100.0; S(5): 100.0; S(8): 0.0; S(12): 0.0	4.3111e+06	0.003	0.03809	13.73	0.605809	2	1624.62	1.36026	8.66626	1
High	DGsGTPSRHSLSGssPGmK	1	1	1	Q9UQ35	S3(Phospho); S14(Phospho); S15(Phospho); M18(Oxidation)	0	S(3): 99.7; T(5): 0.4; S(7): 4.3; S(10): 4.4; S(12): 63.7; S(14): 63.7; S(15): 63.7	7.72943e+06	0.001	0.02643	22.52	0.0652118	3	2100.75	1.42201	8.37136	1
High	SGsSQELDVKPsASPQER	6	1	1	Q9UQ35	S3(Phospho); S12(Phospho)	0	S(1): 33.3; S(3): 33.3; S(4): 33.3; S(12): 50.0; S(14): 50.0	4.53362e+06	0.004	0.05754	10.71	2.19938	2	2061.86	1.49729	13.7817	1
High	SSsASSPEMK	1	1	1	Q9UQ35	S3(Phospho)	0	S(1): 0.0; S(2): 0.0; S(3): 100.0; S(5): 0.0; S(6): 0.0	1.28066e+06	0	0.001883	31.91	0.00396164	2	1090.41	0.444809	5.91914	0
High	RPsPQPSPR	1	1	1	Q9UQ35	S3(Phospho)	0	S(3): 100.0; S(7): 0.0	2.35549e+07	0	0.01054	32.02	0.00982911	2	1101.52	0.494935	5.32345	1
High	SLsYSPVER	3	1	1	Q9UQ35	S3(Phospho)	0	S(1): 0.0; S(3): 100.0; Y(4): 0.0; S(5): 0.0	1.18603e+07	0	0.009033	24.45	0.0590427	2	1117.49	0.144144	15.1911	0
High	SSsPVTELASR	1	1	1	Q9UQ35	S3(Phospho)	0	S(1): 0.0; S(2): 0.0; S(3): 100.0; T(6): 0.0; S(10): 0.0	3.44686e+07	0	3.511e-05	63.92	6.50841e-06	2	1213.54	-1.10994	14.7023	0
High	QGsITSPQANEQSVTPQR	3	1	1	Q9UQ35	S3(Phospho)	0	S(3): 33.3; T(5): 33.3; S(6): 33.3; S(13): 0.0; T(15): 0.0	2.72855e+06	0	0.001018	24.55	0.108908	2	2007.92	2.21017	13.821	0
High	ELsNSPLRENSFGSPLEFR	2	1	1	Q9UQ35	S3(Phospho)	0	S(3): 50.0; S(5): 50.0; S(11): 0.0; S(14): 0.0	1.57831e+07	0	2.585e-06	35.46	0.00987028	3	2259.05	0.419588	24.8214	1
High	HGGSPQPLATTPLSQEPVNPPSEAsPTR	3	1	1	Q9UQ35	S25(Phospho)	0	S(4): 0.0; T(10): 0.0; T(11): 0.0; S(14): 0.0; S(22): 0.0; S(25): 50.0; T(27): 50.0	3.76109e+07	0	2.175e-11	41.56	0.00257997	3	2932.38	0.409422	19.9928	0
High	RGEGDAPFSEPGTTSTQRPssPETATK	1	1	1	Q9UQ35	S20(Phospho); S21(Phospho)	0	S(9): 0.1; T(13): 2.8; T(14): 2.8; S(15): 2.8; T(16): 2.8; S(20): 89.4; S(21): 99.1; T(24): 0.1; T(26): 0.0	2.96989e+07	0	0.0002109	23.13	0.189456	3	2951.25	0.822961	13.301	2
High	RGEGDAPFSEPGTTSTQRPsSPETATK	4	1	1	Q9UQ35	S20(Phospho)	0	S(9): 0.0; T(13): 0.0; T(14): 0.0; S(15): 0.0; T(16): 0.0; S(20): 49.5; S(21): 49.5; T(24): 0.9; T(26): 0.0	1.3333e+08	0	1.355e-11	30.53	0.0359799	4	2871.28	0.78523	11.3557	2
High	SsTPPGESYFGVSSLQLK	5	1	1	Q9UQ35	S2(Phospho)	0	S(1): 20.0; S(2): 20.0; T(3): 20.0; S(8): 20.0; Y(9): 20.0; S(13): 0.0; S(14): 0.0	5.23264e+06	0	0.006758	12.34	1.75325	3	1963.91	1.90041	28.1912	0
High	MGQAPSQSLLPPAQDQPRsPVPSAFSDQSR	1	1	1	Q9UQ35	S19(Phospho)	0	S(6): 0.0; S(8): 0.1; S(19): 94.1; S(23): 2.9; S(26): 2.9; S(29): 0.0	1.26604e+08	0	0.0002141	12.62	2.02669	3	3259.52	-0.176036	22.8272	1
High	AQTPPGPSLSGSKsPcPQEK	1	1	1	Q9UQ35	S14(Phospho); C16(Carbamidomethyl)	0	T(3): 0.0; S(8): 0.0; S(10): 0.0; S(12): 0.0; S(14): 100.0	2.58438e+07	0	5.167e-06	14.74	1.05086	3	2132.97	0.681873	10.6977	1
High	TPAAAAAMNLAsPR	1	1	1	Q9UQ35	S12(Phospho)	0	T(1): 0.0; S(12): 100.0	1.04221e+07	0	1.497e-12	116.6	5.02091e-11	2	1421.66	-1.33733	18.2697	0
High	MAPALSGANLTsPR	1	1	1	Q9UQ35	S12(Phospho)	0	S(6): 0.0; T(11): 0.0; S(12): 100.0	9.69383e+06	0	3.385e-09	56.12	5.14342e-05	2	1465.69	1.39193	19.6319	0
High	MALPPQEDATAsPPR	5	1	1	Q9UQ35	S12(Phospho)	0	T(10): 0.8; S(12): 99.2	1.58495e+08	0	3.507e-08	64.04	9.38808e-06	2	1660.74	1.26016	18.3894	0
High	AGMSSNQSISsPVLDAVPRtPSR	1	1	1	Q9UQ35	S11(Phospho); T20(Phospho)	0	S(4): 0.0; S(5): 0.0; S(8): 0.0; S(10): 50.0; S(11): 50.0; T(20): 98.1; S(22): 1.9	1.02454e+07	0	0.001078	12.29	2.08341	3	2517.13	3.30379	23.3481	1
High	DGSGTPSRHsLsGsSPGMK	1	1	1	Q9UQ35	S10(Phospho); S12(Phospho); S14(Phospho)	0	S(3): 2.0; T(5): 98.0; S(7): 50.0; S(10): 50.0; S(12): 2.0; S(14): 96.1; S(15): 2.0	8.81191e+06	0	0.007774	11	1.0922	3	2084.75	0.0770328	11.0371	1
High	THTTALAGRsPsPASGR	1	1	1	Q9UQ35	S10(Phospho); S12(Phospho)	0	T(1): 0.0; T(3): 0.0; T(4): 0.0; S(10): 100.0; S(12): 100.0; S(15): 0.0	2.56222e+07	0	4.091e-06	37.06	0.00505747	2	1826.8	2.02219	7.1137	1
High	SSGHSSSELsPDAVEK	2	1	1	Q9UQ35	S10(Phospho)	0	S(1): 0.0; S(2): 0.0; S(5): 0.0; S(6): 0.0; S(7): 0.0; S(10): 100.0	3.51374e+07	0	2.587e-09	65.58	5.92126e-06	2	1696.71	1.36228	9.62329	0
High	AGMSSNQSIsSPVLDAVPR	5	1	1	Q9UQ35	S10(Phospho)	0	S(4): 0.0; S(5): 0.0; S(8): 0.0; S(10): 50.0; S(11): 50.0	3.93421e+07	0	9.379e-09	78.13	4.45296e-07	2	1995.92	-1.67761	24.6206	0
High	sRtPLLPR	1	1	1	Q9UQ35	S1(Phospho); T3(Phospho)	0	S(1): 100.0; T(3): 100.0	1.23245e+08	0.006	0.08811	32.31	0.0109273	2	1099.51	1.12643	15.1007	1
High	sRtPPSAPSQSR	1	1	1	Q9UQ35	S1(Phospho); T3(Phospho)	0	S(1): 100.0; T(3): 100.0; S(6): 0.0; S(9): 0.0; S(11): 0.0	4.94421e+07	0	0.009091	31.44	0.0113411	2	1430.59	1.8869	7.09144	1
High	sLSYsPVER	1	1	1	Q9UQ35	S1(Phospho); S5(Phospho)	0	S(1): 100.0; S(3): 0.0; Y(4): 0.0; S(5): 100.0	8.63193e+06	0	0.0013	38.61	0.00151493	2	1197.46	1.03328	20.4051	0
High	sVsPcSNVESR	1	1	1	Q9UQ35	S1(Phospho); S3(Phospho); C5(Carbamidomethyl)	0	S(1): 100.0; S(3): 100.0; S(6): 0.0; S(10): 0.0	3.53253e+07	0	0.001693	27.38	0.0132537	2	1381.49	0.783623	13.0386	0
High	sSsPVTELASR	2	1	1	Q9UQ35	S1(Phospho); S3(Phospho)	0	S(1): 50.0; S(2): 50.0; S(3): 100.0; T(6): 0.0; S(10): 0.0	4.53443e+07	0	1.828e-05	53.44	5.27626e-05	2	1293.51	0.545663	21.6059	0
High	sPGmLEPLGSSR	1	1	1	Q9UQ35	S1(Phospho); M4(Oxidation)	0	S(1): 100.0; S(10): 0.0; S(11): 0.0	7.09191e+06	0	0.006873	11.9	1.04273	2	1326.58	0.42846	16.8488	0
High	sPGMLEPLGSSR	1	1	1	Q9UQ35	S1(Phospho)	0	S(1): 100.0; S(10): 0.0; S(11): 0.0	1.67845e+07	0	7.366e-06	46.88	0.00038767	2	1310.58	-0.465721	21.0727	0
High	sPVPSAFSDQSR	1	1	1	Q9UQ35	S1(Phospho)	0	S(1): 100.0; S(5): 0.0; S(8): 0.0; S(11): 0.0	5.85786e+07	0	0.001155	32.71	0.00822448	2	1357.57	-4.78449	15.7806	0
High	sGSSQELDVKPSASPQER	3	1	1	Q9UQ35	S1(Phospho)	0	S(1): 33.3; S(3): 33.3; S(4): 33.3; S(12): 0.0; S(14): 0.0	8.51841e+06	0	1.737e-07	61.39	2.19647e-05	2	1981.89	1.93856	11.2207	1
High	TPAAAAAmNLAsPR	1	1	1	Q9UQ35	M8(Oxidation); S12(Phospho)	0	T(1): 0.0; S(12): 100.0	3229371	0	1.578e-05	35.57	0.00578237	2	1437.65	-5.00275	13.4068	0
High	AGmSSNQSISsPVLDAVPR	6	1	1	Q9UQ35	M3(Oxidation); S11(Phospho)	0	S(4): 0.0; S(5): 0.0; S(8): 0.0; S(10): 0.0; S(11): 100.0	1.8167e+07	0	1.42e-11	82.8	1.56393e-07	2	2011.92	2.44068	23.0347	0
High	mALPPQEDAtASPPR	1	1	1	Q9UQ35	M1(Oxidation); T10(Phospho)	0	T(10): 50.0; S(12): 50.0	4.62817e+07	0.004	0.05864	20.64	0.214882	2	1676.74	0.640699	14.9275	0
High	ScFESsPDPELK	1	1	1	Q9UQ35	C2(Carbamidomethyl); S6(Phospho)	0	S(1): 0.0; S(5): 1.1; S(6): 98.9	1.18809e+08	0	0.0002762	37.61	0.0023233	2	1475.58	1.17926	16.1586	0
High	cRsPGMLEPLGSSR	2	1	1	Q9UQ35	C1(Carbamidomethyl); S3(Phospho)	0	S(3): 100.0; S(12): 0.0; S(13): 0.0	1.19832e+07	0	1.199e-07	36.53	0.00532483	3	1626.71	0.179883	14.9573	1
High	SLGsVQAPSYGAR	1	1	1	P05783	S4(Phospho)	0	S(1): 0.0; S(4): 100.0; S(9): 0.0; Y(10): 0.0	1.79902e+07	0	0.0001774	39.45	0.00254242	2	1372.63	0.753506	16.6119	0
High	PVSSAASVYAGAGGsGSR	3	1	1	P05783	S15(Phospho)	0	S(3): 0.0; S(4): 0.0; S(7): 0.0; Y(9): 0.0; S(15): 100.0; S(17): 0.0	9.83896e+06	0	2.218e-15	98.54	3.13508e-09	2	1660.73	1.31182	13.3823	0
High	sTFSTNYR	2	1	1	P05783	S1(Phospho)	0	S(1): 50.0; T(2): 50.0; S(4): 0.0; T(5): 0.0; Y(7): 0.0	1.21046e+07	0	0.006373	41.05	0.000679229	2	1055.42	-0.0219608	11.8064	0
High	DGQVINEtSQHHDDLE	1	1	1	P08670	T8(Phospho)	0	T(8): 50.0; S(9): 50.0	8.09516e+06	0	0.0006003	26.63	0.0436713	3	1916.77	1.00329	12.4692	0
High	EtNLDSLPLVDTHSK	2	1	1	P08670	T2(Phospho)	0	T(2): 100.0; S(6): 0.0; T(12): 0.0; S(14): 0.0	8.72891e+06	0	0.000656	20.54	0.251236	3	1748.81	-0.224529	21.9	0
High	SLYASsPGGVYATR	4	1	1	P08670	S6(Phospho)	0	S(1): 0.0; Y(3): 0.0; S(5): 0.0; S(6): 100.0; Y(11): 0.0; T(13): 0.0	2.53592e+08	0	2.256e-11	95.55	6.11554e-09	2	1508.68	0.0848126	17.8483	0
High	LRSsVPGVR	1	1	1	P08670	S4(Phospho)	0	S(3): 0.0; S(4): 100.0	1.3162e+07	0.009	0.1186	29.39	0.0146152	2	1050.55	1.35393	8.99235	1
High	SGAQASStPLsPTR	1	1	1	P02545	T8(Phospho); S11(Phospho)	0	S(1): 0.0; S(6): 0.0; S(7): 0.0; T(8): 100.0; S(11): 99.1; T(13): 0.9	1.47715e+07	0	9.984e-06	43.31	0.000711656	2	1519.62	2.6119	13.3599	0
High	LRLsPsPTSQR	2	1	1	P02545	S4(Phospho); S6(Phospho)	0	S(4): 100.0; S(6): 100.0; T(8): 0.0; S(9): 0.0	4.06153e+08	0	0.001873	25.68	0.0528624	3	1401.63	-0.272693	13.6098	1
High	LSPsPTSQR	1	1	1	P02545	S4(Phospho)	0	S(2): 0.0; S(4): 100.0; T(6): 0.0; S(7): 0.0	2.17694e+08	0	0.01101	38.44	0.00194061	2	1052.48	0.31769	7.63533	0
High	LRLsPSPTSQR	2	1	1	P02545	S4(Phospho)	0	S(4): 100.0; S(6): 0.0; T(8): 0.0; S(9): 0.0	1.61756e+08	0	0.004829	18.09	0.28952	3	1321.66	-1.01113	10.932	1
High	ASsHSSQTQGGGSVTK	13	1	1	P02545	S3(Phospho)	0.0351	S(2): 1.7; S(3): 98.3; S(5): 0.0; S(6): 0.0; T(8): 0.0; S(13): 0.0; T(15): 0.0	3.50826e+07	0	7.673e-08	54.82	7.16901e-05	2	1598.68	2.31532	0.365785	0
High	SGAQASSTPLsPTR	1	1	1	P02545	S11(Phospho)	0	S(1): 0.0; S(6): 0.0; S(7): 0.0; T(8): 0.0; S(11): 100.0; T(13): 0.0	1.26722e+08	0	4.392e-08	67.89	3.55182e-06	2	1439.65	1.33109	11.1692	0
High	sSFSQHAR	2	1	1	P02545	S1(Phospho)	0	S(1): 33.3; S(2): 33.3; S(4): 33.3	4.36647e+06	0	0.004065	31.96	0.00499884	2	999.405	0.420705	2.70247	0
High	sVGGSGGGSFGDNLVTR	1	1	1	P02545	S1(Phospho)	0	S(1): 100.0; S(5): 0.0; S(9): 0.0; T(16): 0.0	1.50136e+07	0	6.667e-12	117.08	4.19193e-11	2	1646.72	-0.595275	19.7283	0
High	mEtPSQR	1	1	1	P02545	N-Term(Acetyl); T3(Phospho)	0	T(3): 100.0; S(5): 0.0	2.77002e+06	0	0.005361	35.99	0.00134696	2	970.37	-0.351201	14.0426	0
High	ESEDKPEIEDVGsDEEEEK	1	1	1	P07900	S13(Phospho)	0	S(2): 0.0; S(13): 100.0	8.18136e+06	0	0.0011	28.42	0.0336679	2	2272.89	2.99435	12.6217	1
High	ESEDKPEIEDVGsDEEEEKK	1	1	1	P07900	S13(Phospho)	0	S(2): 0.0; S(13): 100.0	5.61474e+07	0.003	0.03194	13.52	1.24497	3	2400.98	1.10068	10.4103	2
High	VDIDtPDINIEGSEGK	1	1	1	Q09666	T5(Phospho)	0	T(5): 100.0; S(13): 0.0	4.76831e+06	0	1.361e-06	60.13	2.63493e-05	2	1781.78	-0.859773	23.2168	0
High	VDIDtPDIDIHGPEGK	1	1	1	Q09666	T5(Phospho)	0	T(5): 100.0	3.8537e+06	0	0.0001376	17.02	0.639523	3	1800.81	0.727678	19.9394	0
High	FGTFGGLGsK	1	1	1	Q09666	S9(Phospho)	0	T(3): 0.0; S(9): 100.0	4.96393e+06	0	0.01128	36.16	0.00290523	2	1050.47	0.447184	20.4708	0
High	LPSGSGAAsPTGSAVDIR	3	1	1	Q09666	S9(Phospho)	0	S(3): 0.0; S(5): 0.0; S(9): 100.0; T(11): 0.0; S(13): 0.0	5.09677e+07	0	9.758e-16	128.69	3.66412e-12	2	1722.81	1.65492	17.4669	0
High	GHYEVTGsDDETGK	2	1	1	Q09666	S8(Phospho)	0	Y(3): 0.0; T(6): 0.0; S(8): 100.0; T(12): 0.0	1.71295e+07	0	6.556e-07	49.77	0.000138125	2	1574.6	0.505352	7.00879	0
High	GHYEVTGsDDETGKLQGSGVSLASK	2	1	1	Q09666	S8(Phospho)	0	Y(3): 0.0; T(6): 0.0; S(8): 97.9; T(12): 2.1; S(18): 0.0; S(21): 0.0; S(24): 0.0	3.31691e+07	0	5.35e-06	19.43	0.440707	3	2602.17	1.7407	14.4131	1
High	AEAPLPsPK	1	1	1	Q09666	S7(Phospho)	0	S(7): 100.0	4.22809e+06	0.001	0.01527	18.74	0.194475	2	989.471	0.362238	13.0922	0
High	DIDISsPEFK	1	1	1	Q09666	S6(Phospho)	0	S(5): 0.0; S(6): 100.0	2.73357e+07	0.001	0.01271	28.67	0.0213255	2	1230.53	0.253691	23.4372	0
High	GGVTGsPEASISGSK	1	1	1	Q09666	S6(Phospho)	0	T(4): 0.0; S(6): 100.0; S(10): 0.0; S(12): 0.0; S(14): 0.0	2.86033e+07	0	5.674e-10	85.72	5.89417e-08	2	1413.63	2.74752	12.3316	0
High	EFSGPsTPTGTLEFEGGEVSLEGGK	5	1	1	Q09666	S6(Phospho)	0	S(3): 19.9; S(6): 19.9; T(7): 19.9; T(9): 19.9; T(11): 19.9; S(20): 0.6	3.52269e+06	0	0.0001576	15.2	1.16872	2	2592.15	3.36415	28.7956	0
High	ASLGsLEGEAEAEASsPK	4	1	1	Q09666	S5(Phospho); S16(Phospho)	0	S(2): 0.0; S(5): 100.0; S(15): 1.2; S(16): 98.8	1.30779e+07	0	2.309e-09	59.23	2.51334e-05	2	1892.76	1.1344	27.0591	0
High	KGDRsPEPGQTWTR	1	1	1	Q09666	S5(Phospho)	0	S(5): 100.0; T(11): 0.0; T(13): 0.0	1.18082e+07	0	2.947e-07	24.05	0.108817	3	1694.77	0.420537	6.88066	2
High	ASLGsLEGEAEAEASSPK	3	1	1	Q09666	S5(Phospho)	0	S(2): 0.0; S(5): 100.0; S(15): 0.0; S(16): 0.0	5.44246e+07	0	1.214e-09	80.87	2.39401e-07	2	1812.79	0.254068	23.3883	0
High	LPsGSGAAsPTGSAVDIR	2	1	1	Q09666	S3(Phospho); S9(Phospho)	0	S(3): 50.0; S(5): 50.0; S(9): 100.0; T(11): 0.0; S(13): 0.0	1.41776e+07	0	3.654e-05	46.72	0.00052565	2	1802.77	0.621114	23.1372	0
High	LKsEDGVEGDLGETQSR	1	1	1	Q09666	S3(Phospho)	0	S(3): 100.0; T(14): 0.0; S(16): 0.0	5.14444e+06	0	2.772e-05	29.1	0.0347551	3	1899.84	1.65625	12.0332	1
High	IsmSEVDLNVAAPK	1	1	1	Q09666	S2(Phospho); M3(Oxidation)	0	S(2): 98.7; S(4): 1.3	3.40059e+06	0	0.000118	37.22	0.00459003	2	1569.72	1.07773	21.3435	0
High	IsMSEVDLNVAAPK	1	1	1	Q09666	S2(Phospho)	0	S(2): 100.0; S(4): 0.0	7.49039e+06	0	1.521e-08	68.84	3.174e-06	2	1553.73	0.33017	26.0801	0
High	IsAPNVDFNLEGPK	1	1	1	Q09666	S2(Phospho)	0	S(2): 100.0	2.15299e+07	0	7.859e-09	64.02	9.58993e-06	2	1580.73	-0.726011	26.5479	0
High	ISMQDVDLSLGsPK	1	1	1	Q09666	S12(Phospho)	0	S(2): 0.0; S(9): 0.0; S(12): 100.0	8.32114e+06	0	2.403e-06	45.38	0.000737374	2	1569.72	-0.31886	26.8208	0
High	VSMPDVELNLKsPK	1	1	1	Q09666	S12(Phospho)	0	S(2): 0.0; S(12): 100.0	7.93264e+06	0	4.918e-05	36.41	0.00626254	2	1636.81	2.31868	21.3193	1
High	DELHIVEAEAMNYEGsPIK	3	1	1	P06748	S16(Phospho)	0	Y(13): 0.0; S(16): 100.0	2.07352e+08	0	3.375e-13	67.9	5.17357e-06	2	2224.99	2.04418	26.7752	0
High	DELHIVEAEAmNYEGsPIK	4	1	1	P06748	M11(Oxidation); S16(Phospho)	0	Y(13): 0.0; S(16): 100.0	1.69067e+08	0	6.919e-07	20.16	0.345533	2	2240.98	1.57509	24.6593	0
High	cGSGPVHISGQHLVAVEEDAEsEDEEEEDVK	11	1	1	P06748	C1(Carbamidomethyl); S22(Phospho)	0	S(3): 0.0; S(9): 0.0; S(22): 100.0	2.75435e+09	0	1.121e-20	90.44	3.66882e-08	3	3460.44	1.84957	18.0158	0
High	KGAGDGsDEEVDGK	1	1	1	P35579	S7(Phospho)	0	S(7): 100.0	1.32459e+07	0	2.961e-09	70.86	1.08286e-06	2	1443.57	1.20737	5.21735	1
High	KGAAPtPPGK	1	1	1	Q13428	T6(Phospho)	0	T(6): 100.0	7.4558e+07	0	7.755e-06	50.46	0.000164608	2	1003.5	-0.224638	5.4303	1
High	VGDVtPQVK	1	1	1	Q13428	T5(Phospho)	0	T(5): 100.0	3.81036e+06	0.008	0.1084	12.06	0.896112	2	1022.49	0.314686	11.1282	0
High	AASAPAKEsPR	1	1	1	Q13428	S9(Phospho)	0	S(3): 0.0; S(9): 100.0	4.496e+07	0	0.0001204	50.27	0.000179487	2	1164.54	1.25689	4.3627	1
High	AALAPAKEsPR	2	1	1	Q13428	S9(Phospho)	0	S(9): 100.0	9.25355e+07	0	0.0001046	52.05	0.000115391	2	1190.59	0.99237	6.49929	1
High	ASSVSTKEsPAR	1	1	1	Q13428	S9(Phospho)	0	S(2): 0.0; S(3): 0.0; S(5): 0.0; T(6): 0.0; S(9): 100.0	1.27214e+07	0	1.692e-06	74.56	6.21153e-07	2	1299.6	0.90039	5.19641	1
High	SAEPsANTTLVSETEEEGSVPAFGAAAK	6	1	1	Q13428	S5(Phospho)	0	S(1): 47.1; S(5): 47.1; T(8): 1.4; T(9): 1.4; S(12): 1.4; T(14): 1.4; S(19): 0.0	1.17801e+07	0	0.0001635	26.08	0.0940794	2	2830.27	2.11654	25.7634	0
High	LDSsPSVSSTLAAK	1	1	1	Q13428	S4(Phospho)	0	S(3): 0.0; S(4): 100.0; S(6): 0.0; S(8): 0.0; S(9): 0.0; T(10): 0.0	7.70309e+07	0	7.954e-07	55.52	6.12987e-05	2	1442.68	0.370016	16.3028	0
High	KLsGDQPAAR	1	1	1	Q13428	S3(Phospho)	0	S(3): 100.0	1.09156e+08	0	1.321e-05	65.67	4.95965e-06	2	1122.53	0.389314	5.40102	1
High	PTsSPAKGPPQK	2	1	1	Q13428	S3(Phospho)	0	T(2): 0.0; S(3): 50.0; S(4): 50.0	9.54688e+06	0.005	0.07971	11.51	1.41264	2	1274.62	1.11705	5.23359	1
High	SPAGPAATPAQAQAAsTPR	2	1	1	Q13428	S16(Phospho)	0	S(1): 0.0; T(8): 0.0; S(16): 50.0; T(17): 50.0	4.36164e+06	0	0.0001755	19.26	0.372331	2	1829.86	2.15295	11.6762	0
High	TSQVGAASAPAKEsPR	3	1	1	Q13428	S14(Phospho)	0	T(1): 0.0; S(2): 0.0; S(8): 0.0; S(14): 100.0	1.02086e+08	0	8.753e-11	97.2	5.06853e-09	2	1636.77	2.29259	6.50101	1
High	KSAEPSANTTLVsEtEEEGSVPAFGAAAK	1	1	1	Q13428	S13(Phospho); T15(Phospho)	0	S(2): 0.5; S(6): 1.3; T(9): 33.2; T(10): 33.2; S(13): 33.2; T(15): 49.3; S(20): 49.3	3.54638e+06	0	1.344e-05	21.78	0.243594	3	3038.33	0.694465	23.9842	1
High	QEAKPQQAAGMLsPK	2	1	1	Q13428	S13(Phospho)	0	S(13): 100.0	9.18381e+06	0	5.22e-06	45.31	0.000780272	2	1663.79	0.574218	11.1024	1
High	KSAEPSANTTLVsETEEEGSVPAFGAAAK	1	1	1	Q13428	S13(Phospho)	0	S(2): 0.0; S(6): 0.0; T(9): 0.0; T(10): 0.0; S(13): 100.0; T(15): 0.0; S(20): 0.0	2.52664e+07	0	3.25e-14	54.84	0.000117458	3	2958.36	0.452602	21.628	1
High	LGAGEGGEASVsPEK	1	1	1	Q13428	S12(Phospho)	0	S(10): 0.0; S(12): 100.0	1.39427e+08	0	2.341e-12	119.28	2.39015e-11	2	1467.64	0.677552	11.1652	0
High	SLGNILQAKPTsSPAK	3	1	1	Q13428	S12(Phospho)	0	S(1): 0.0; T(11): 0.5; S(12): 49.8; S(13): 49.8	1.29257e+07	0	1.636e-08	59.64	2.36298e-05	2	1691.87	0.143139	15.8285	1
High	TVANLLSGKsPR	1	1	1	Q13428	S10(Phospho)	0	T(1): 0.0; S(7): 0.0; S(10): 100.0	6.6294e+06	0	0.008284	16.28	0.486318	3	1322.68	-0.221151	13.0905	1
High	ISSSsFSR	1	1	1	P05787	S5(Phospho)	0	S(2): 0.0; S(3): 0.0; S(4): 0.0; S(5): 100.0; S(7): 0.0	5.30343e+06	0	0.006156	44.61	0.000368425	2	950.398	0.260547	10.4773	0
High	VGsSNFR	1	1	1	P05787	S3(Phospho)	0	S(3): 50.0; S(4): 50.0	2.2087e+06	0.007	0.09626	27.12	0.0149448	2	846.35	-0.23974	8.3839	0
High	LVsESSDVLPK	1	1	1	P05787	S3(Phospho)	0	S(3): 97.0; S(5): 1.5; S(6): 1.5	4.63538e+06	0	0.01054	19.78	0.2814	2	1253.6	1.60137	19.9291	0
High	AsLEAAIADAEQR	1	1	1	P05787	S2(Phospho)	0	S(2): 100.0	3.30766e+06	0	3.979e-08	64.51	7.64634e-06	2	1424.64	-0.614583	22.328	0
High	sYTSGPGSR	1	1	1	P05787	S1(Phospho)	0	S(1): 1.5; Y(2): 1.5; T(3): 95.6; S(4): 1.5; S(8): 0.0	1.28443e+08	0.003	0.03745	21.95	0.0443593	2	991.388	0.201664	6.5067	0
High	sLDMDSIIAEVK	2	1	1	P05787	S1(Phospho)	0	S(1): 100.0; S(6): 0.0	1.79563e+06	0	0.005838	22.06	0.142507	2	1400.64	2.63941	32.1013	0
High	LGMLsPEGTcK	1	1	1	P49327	S5(Phospho); C10(Carbamidomethyl)	0	S(5): 100.0; T(9): 0.0	7.14452e+06	0	1.168e-08	71.92	9.99379e-07	2	1272.54	-0.120875	18.2972	0
High	ADEASELAcPtPK	1	1	1	P49327	C9(Carbamidomethyl); T11(Phospho)	0	S(5): 0.0; T(11): 100.0	3.49858e+07	0	1.776e-06	50.89	0.000126687	2	1468.6	0.139249	13.9865	0
High	LsLEGDHSTPPSAYGSVK	2	2	1	P07355	S2(Phospho)	0	S(2): 100.0; S(8): 0.0; T(9): 0.0; S(12): 0.0; Y(14): 0.0; S(16): 0.0	5.55401e+06	0	0.001049	19.5	0.360729	2	1924.87	0.856524	16.2575	0
High	ALEsPERPFLAILGGAK	2	1	1	P00558	S4(Phospho)	0	S(4): 100.0	9989309	0	0.001719	17.41	0.310453	2	1848.96	1.01813	29.5857	1
High	ALVAtPGKK	1	1	1	P19338	T5(Phospho)	0	T(5): 100.0	1.1131e+07	0.002	0.03016	32.41	0.00714775	2	964.523	0.622824	6.66857	1
High	AAAAAPAsEDEDDEDDEDDEDDDDDEEDDsEEEAMETTPAK	1	1	1	P19338	S8(Phospho); S30(Phospho)	0	S(8): 100.0; S(30): 100.0; T(37): 0.0; T(38): 0.0	23746635	0	5.197e-06	30.52	0.00802876	3	4606.51	3.88549	24.0818	0
High	EVEEDsEDEEmsEDEEDDSsGEEVVIPQKK	4	1	1	P19338	S6(Phospho); M11(Oxidation); S12(Phospho); S20(Phospho)	0	S(6): 75.0; S(12): 75.0; S(19): 75.0; S(20): 75.0	9.74788e+06	0.001	0.01923	11.25	1.25232	3	3697.31	3.41749	24.1994	1
High	KVVVsPTKK	2	1	1	P19338	S5(Phospho)	0	S(5): 0.5; T(7): 99.5	1.36287e+08	0	0.004187	51.47	6.27311e-05	2	1065.61	0.721883	3.47575	2
High	VVVsPTK	1	1	1	P19338	S4(Phospho)	0	S(4): 100.0; T(6): 0.0	2.96928e+07	0.005	0.07761	33.32	0.00346862	2	809.417	0.34538	8.27683	0
High	KEDSDEEEDDDsEEDEEDDEDEDEDEDEIEPAAMK	1	1	1	P19338	S12(Phospho)	0	S(4): 0.1; S(12): 99.9	1.28704e+07	0	0.0003167	26	0.0313986	3	4199.45	8.6544	19.0564	1
High	IMNTFSVVPsPK	1	4	2	P68371;P07437	S10(Phospho)	0	T(4): 0.0; S(6): 0.0; S(10): 100.0	3.83903e+06	0	0.0008483	26.09	0.0526519	2	1399.67	0.475186	24.5588	0
High	KPAtPAEDDEDDDIDLFGsDNEEEDKEAAQLR	1	1	1	P29692	T4(Phospho); S19(Phospho)	0	T(4): 100.0; S(19): 100.0	4.23945e+07	0	1.93e-12	28.95	0.04037	4	3737.5	1.44503	24.0008	2
High	KPATPAEDDEDDDIDLFGsDNEEEDK	1	1	1	P29692	S19(Phospho)	0	T(4): 0.0; S(19): 100.0	1.62095e+07	0	0.001283	19.37	0.280357	3	2989.16	-1.13716	21.8338	1
High	KPATPAEDDEDDDIDLFGsDNEEEDKEAAQLR	5	1	1	P29692	S19(Phospho)	0	T(4): 0.0; S(19): 100.0	1.43808e+09	0	1.925e-17	68.19	5.99993e-06	3	3657.53	2.57112	21.9265	2
High	PATPAEDDEDDDIDLFGsDNEEEDKEAAQLR	2	1	1	P29692	S18(Phospho)	0.05	T(3): 0.0; S(18): 100.0	1.75103e+07	0	4.54e-08	38.06	0.00543194	3	3529.44	1.90333	25.1047	1
High	ATAPQTQHVsPmR	2	1	1	P29692	S10(Phospho); M12(Oxidation)	0	T(2): 0.0; T(6): 0.0; S(10): 100.0	1.28025e+08	0	0.007132	23.88	0.099655	3	1519.67	1.02391	5.9746	0
High	ATAPQTQHVsPMR	2	1	1	P29692	S10(Phospho)	0	T(2): 0.0; T(6): 0.0; S(10): 100.0	3.01404e+08	0	4.154e-07	79.76	2.47295e-07	2	1503.68	3.14176	7.92582	0
High	KEESEEsDDDmGFGLFD	3	2	2	P05387;P05386	S7(Phospho); M11(Oxidation)	0	S(4): 0.0; S(7): 100.0	1.04719e+08	0	6.494e-08	94.13	3.55458e-09	2	2045.72	1.83091	28.3617	1
High	KEESEEsDDDMGFGLFD	1	2	2	P05387;P05386	S7(Phospho)	0	S(4): 0.0; S(7): 100.0	2.25895e+08	0	5.711e-06	51.2	9.02707e-05	2	2029.72	-0.720067	32.3064	1
High	KEEsEEsDDDmGFGLFD	4	2	2	P05387;P05386	S4(Phospho); S7(Phospho); M11(Oxidation)	0	S(4): 100.0; S(7): 100.0	2.98626e+09	0	4.301e-07	49.89	4.87185e-05	2	2125.69	0.832672	37.2163	1
High	KEEsEEsDDDMGFGLFD	4	2	2	P05387;P05386	S4(Phospho); S7(Phospho)	0	S(4): 100.0; S(7): 100.0	4.15094e+09	0	1.053e-06	59.8	7.27754e-06	2	2109.69	0.627425	42.0291	1
High	NYQQNYQNsEsGEKNEGSESAPEGQAQQR	3	1	1	P67809	S9(Phospho); S11(Phospho)	0	Y(2): 0.0; Y(6): 1.9; S(9): 49.5; S(11): 49.5; S(18): 49.5; S(20): 49.5	2.22022e+07	0	0.0002813	13.92	1.13948	3	3417.33	1.4585	10.3118	1
High	NYQQNYQNsESGEK	1	1	1	P67809	S9(Phospho)	0	Y(2): 0.0; Y(6): 0.0; S(9): 100.0; S(11): 0.0	7.69029e+06	0	1.454e-07	75.87	4.17996e-07	2	1768.68	1.60752	7.10001	0
High	NYQQNYQNsESGEKNEGSESAPEGQAQQR	3	1	1	P67809	S9(Phospho)	0	Y(2): 0.0; Y(6): 0.0; S(9): 98.0; S(11): 2.0; S(18): 0.0; S(20): 0.0	1.10547e+08	0	9.253e-14	56.41	8.05674e-05	3	3337.37	2.08539	8.5964	1
High	NEGsESAPEGQAQQR	2	1	1	P67809	S4(Phospho)	0	S(4): 50.0; S(6): 50.0	2.16984e+06	0	1.083e-06	46.71	0.000378615	2	1667.67	3.39516	6.33779	0
High	sSEAETQQPPAAPPAAPALSAADTKPGtTGSGAGSGGPGGLTSAAPAGGDKK	8	1	1	P67809	N-Term(Acetyl); T28(Phospho)	0	S(1): 40.0; S(2): 40.0; T(6): 2.2; S(20): 2.2; T(24): 2.2; T(28): 2.2; T(29): 2.2; S(31): 2.2; S(35): 2.2; T(42): 2.2; S(43): 2.2	2.14206e+07	0	8.518e-05	13.08	1.67047	4	4722.21	-1.445	22.0635	2
High	LKDLFDYsPPLHK	3	1	1	Q9NYF8	S8(Phospho)	0	Y(7): 0.0; S(8): 100.0	1.15017e+08	0	0.001521	26.57	0.0590384	3	1652.81	-0.884766	20.3503	1
High	YSPSQNsPIHHIPSR	6	1	1	Q9NYF8	S7(Phospho)	0	Y(1): 0.0; S(2): 0.0; S(4): 0.0; S(7): 100.0; S(14): 0.0	5.79948e+07	0	0.000287	14.51	0.950483	3	1799.82	0.831449	9.72088	0
High	DLFDYsPPLHK	1	1	1	Q9NYF8	S6(Phospho)	0	Y(5): 0.0; S(6): 100.0	6.85909e+07	0	0.001322	28.72	0.0251768	2	1411.63	0.28764	24.4306	0
High	QKFNDsEGDDTEETEDYR	2	1	1	Q9NYF8	S6(Phospho)	0	S(6): 49.6; T(11): 49.6; T(14): 0.9; Y(17): 0.0	3.49964e+06	0.001	0.02444	14.31	0.62089	2	2257.84	1.53662	10.7103	1
High	IDIsPSTLR	1	1	1	Q9NYF8	S4(Phospho)	0	S(4): 100.0; S(6): 0.0; T(7): 0.0	222867034	0	0.004775	36.26	0.00422317	2	1081.53	0.127628	20.9047	0
High	ETQsPEQVK	1	1	1	Q9NYF8	S4(Phospho)	0	T(2): 1.0; S(4): 99.0	4.52117e+06	0.001	0.01317	36.32	0.00345352	2	1125.48	0.601986	5.7865	0
High	FNDsEGDDTEETEDYR	1	1	1	Q9NYF8	S4(Phospho)	0	S(4): 100.0; T(9): 0.0; T(12): 0.0; Y(15): 0.0	3.42843e+07	0	4.217e-11	111.31	6.50853e-11	2	2001.69	2.88472	13.6975	0
High	YsPSQNsPIHHIPSR	7	1	1	Q9NYF8	S2(Phospho); S7(Phospho)	0	Y(1): 50.0; S(2): 50.0; S(4): 0.0; S(7): 100.0; S(14): 0.0	1.11811e+08	0	3.365e-05	48.15	0.000378179	2	1879.79	2.86933	12.0904	0
High	SSATSGDIWPGLSAYDNsPR	1	1	1	Q9NYF8	S18(Phospho)	0	S(1): 0.0; S(2): 0.0; T(4): 0.0; S(5): 0.0; S(13): 0.0; Y(15): 0.0; S(18): 99.9	1.60438e+07	0	0.0003879	27.12	0.0585177	2	2160.93	4.03724	27.6282	0
High	GRAEGEWEDQEALDYFsDKESGK	1	1	1	Q9NYF8	S17(Phospho)	0	Y(15): 50.0; S(17): 50.0; S(21): 0.0	1.03025e+07	0	9.192e-06	37.74	0.00556124	3	2726.14	4.14933	18.8133	2
High	AEGEWEDQEALDYFsDKESGK	2	1	1	Q9NYF8	S15(Phospho)	0	Y(13): 0.0; S(15): 100.0; S(19): 0.0	8.80139e+07	0	4.792e-07	30.47	0.0219421	3	2513.01	1.25918	22.3187	1
High	NTPSQHSHSIQHsPER	2	1	1	Q9NYF8	S13(Phospho)	0	T(2): 0.0; S(4): 0.0; S(7): 0.0; S(9): 0.0; S(13): 100.0	1.51711e+07	0.001	0.01952	27.99	0.0458296	4	1921.83	-0.139247	5.15364	0
High	SSSSSASPSsPSSR	2	1	1	Q9NYF8	S10(Phospho)	0.039	S(1): 0.0; S(2): 0.0; S(3): 0.0; S(4): 0.0; S(5): 0.0; S(7): 0.0; S(9): 0.0; S(10): 100.0; S(12): 0.0; S(13): 0.0	6.94045e+06	0	2.745e-07	74.41	4.70916e-07	2	1390.55	2.37961	5.31661	0
High	KAEGEPQEEsPLK	2	1	1	Q9NYF8	S10(Phospho)	0	S(10): 100.0	4.13854e+07	0	7.401e-08	71.06	1.54336e-06	2	1521.69	5.18332	7.19418	1
High	KAEGEPQEEsPLKSK	2	1	1	Q9NYF8	S10(Phospho)	0	S(10): 100.0; S(14): 0.0	1.68699e+07	0	0.0001073	35.83	0.00689611	3	1736.82	3.34689	5.6391	2
High	sQEEPKDTFEHDPSESIDEFNK	1	1	1	Q9NYF8	S1(Phospho)	0	S(1): 100.0; T(8): 0.0; S(14): 0.0; S(16): 0.0	2.39139e+07	0	0.0002317	12.46	1.82466	3	2688.12	6.56325	17.2176	1
High	IMNTFSVVPsPK	1	4	2	P68371;P07437	S10(Phospho)	0	T(4): 0.0; S(6): 0.0; S(10): 100.0	3.83903e+06	0	0.0008483	26.09	0.0526519	2	1399.67	0.475186	24.5588	0
High	RGSFDAtGSGFSmTFSSSSYSSSGYGR	5	1	1	Q15149	T7(Phospho); M13(Oxidation)	0	S(3): 19.9; T(7): 19.9; S(9): 19.9; S(12): 19.9; T(14): 19.9; S(16): 0.7; S(17): 0.0; S(18): 0.0; S(19): 0.0; Y(20): 0.0; S(21): 0.0; S(22): 0.0; S(23): 0.0; Y(25): 0.0	5.05666e+06	0	0.0005612	25.41	0.0926522	3	2869.15	2.01184	20.7193	1
High	AQLEPVAsPAK	1	1	1	Q15149	S8(Phospho)	0	S(8): 100.0	1.68339e+07	0	0.0003713	34.98	0.00552776	2	1190.58	0.0776159	12.7324	0
High	GYYsPYSVSGSGSTAGSR	1	1	1	Q15149	S4(Phospho)	0	Y(2): 0.0; Y(3): 1.1; S(4): 98.9; Y(6): 0.0; S(7): 0.0; S(9): 0.0; S(11): 0.0; S(13): 0.0; T(14): 0.0; S(17): 0.0	4.02183e+06	0	5.357e-08	43.66	0.000878274	2	1862.76	1.78152	16.6853	0
High	SSsVGsSSSYPISPAVSR	1	1	1	Q15149	S3(Phospho); S6(Phospho)	0	S(1): 1.3; S(2): 1.3; S(3): 97.3; S(6): 1.4; S(7): 97.3; S(8): 1.3; S(9): 0.0; Y(10): 0.0; S(13): 0.0; S(17): 0.0	1.0372e+07	0	7.782e-05	61.18	1.49367e-05	2	1914.78	-4.0789	24.5276	0
High	SSsVGSSSSYPISPAVSR	2	1	1	Q15149	S3(Phospho)	0	S(1): 1.2; S(2): 1.2; S(3): 97.7; S(6): 0.0; S(7): 0.0; S(8): 0.0; S(9): 0.0; Y(10): 0.0; S(13): 0.0; S(17): 0.0	1.33511e+08	0	1.005e-11	79.52	3.1328e-07	2	1834.82	0.545707	18.4994	0
High	TPHVQAVQGPLGsPPK	1	1	1	Q15149	S13(Phospho)	0	T(1): 0.0; S(13): 100.0	1.03164e+07	0	0.0009734	38.71	0.00284649	2	1692.85	1.94644	14.5655	0
High	TPHVQAVQGPLGsPPKR	1	1	1	Q15149	S13(Phospho)	0	T(1): 0.0; S(13): 100.0	9.44536e+06	0	3.214e-05	21.52	0.147281	3	1848.95	0.396634	11.5102	1
High	HTGPNsPDTANDGFVR	2	2	1	P31943	S6(Phospho)	0	T(2): 0.0; S(6): 100.0; T(9): 0.0	4.64632e+07	0	1.394e-10	102.69	1.11153e-09	2	1764.73	0.287991	10.8883	0
High	PSGEAFVELEsEDEVK	1	1	1	P31943	S11(Phospho)	0	S(2): 0.0; S(11): 100.0	7.24967e+06	0	3.239e-09	78.74	3.44842e-07	2	1844.79	1.26742	23.1713	0
High	NIIHGsDSVESAEK	2	1	1	P15531	S6(Phospho)	0	S(6): 49.7; S(8): 49.7; S(11): 0.5	3.69172e+06	0	0.003475	13.1	1.14118	2	1565.69	1.32636	10.3654	0
High	PGGLGSSsLYGLGASR	1	1	1	P08729	S8(Phospho)	0	S(6): 0.9; S(7): 0.9; S(8): 98.2; Y(10): 0.0; S(15): 0.0	5.87348e+06	0	1.613e-09	80.45	2.38466e-07	2	1558.73	0.744338	22.9643	0
High	sIHFSsPVFTSR	2	1	1	P08729	N-Term(Acetyl); S6(Phospho)	0	S(1): 0.0; S(5): 0.0; S(6): 100.0; T(10): 0.0; S(11): 0.0	1.45627e+07	0	2.667e-05	43.88	0.00100064	2	1486.67	0.648618	26.309	0
High	EVEDKEsEGEEEDEDEDLSK	2	1	1	O95218	S7(Phospho)	0	S(7): 100.0; S(19): 0.0	6.44894e+06	0	8.475e-06	36.14	0.00429284	3	2419.9	0.463158	10.286	1
High	YNLDAsEEEDSNK	1	1	1	O95218	S6(Phospho)	0	Y(1): 0.0; S(6): 100.0; S(11): 0.0	2.23377e+07	0	1.802e-10	83.27	4.87462e-08	2	1593.6	0.530018	12.3367	0
High	YNLDAsEEEDSNKKK	1	1	1	O95218	S6(Phospho)	0	Y(1): 0.0; S(6): 100.0; S(11): 0.0	5.62003e+06	0	9.639e-06	59.17	3.02044e-05	2	1849.79	0.919313	6.76237	2
High	EEsDGEYDEFGR	1	1	1	O95218	S3(Phospho)	0	S(3): 100.0; Y(7): 0.0	8.22376e+06	0	1.599e-07	71.5	5.02642e-07	2	1512.52	0.229327	16.367	0
High	YKLDEDEDEDDADLSKYNLDAsEEEDSNK	1	1	1	O95218	S22(Phospho)	0	Y(1): 0.0; S(15): 0.0; Y(17): 0.0; S(22): 100.0; S(27): 0.0	1.38559e+07	0	0.0001291	29.72	0.0321579	3	3474.38	1.58595	19.1883	2
High	ENVEYIEREEsDGEYDEFGR	3	1	1	O95218	S11(Phospho)	0	Y(5): 0.0; S(11): 100.0; Y(15): 0.0	2.1752e+08	0	8.71e-08	53.29	0.00011861	2	2545.01	2.39491	19.5682	1
High	IILDLISEsPIK	1	1	1	P61978	S9(Phospho)	0	S(7): 1.0; S(9): 99.0	1.03967e+07	0	0.004053	25.07	0.0429417	2	1420.77	1.11888	32.001	0
High	RDYDDMsPR	1	1	1	P61978	S7(Phospho)	0	Y(3): 0.0; S(7): 100.0	4.01175e+07	0.001	0.02609	37.04	0.00203628	2	1234.46	-0.217339	7.73801	1
High	GsYGDLGGPIITTQVTIPK	1	1	1	P61978	S2(Phospho)	0	S(2): 50.0; Y(3): 50.0; T(12): 0.0; T(13): 0.0; T(16): 0.0	2.27639e+07	0	3.559e-07	58.88	3.15137e-05	2	1997	-1.03375	29.9311	0
High	DYDDmsPR	1	1	1	P61978	M5(Oxidation); S6(Phospho)	0	Y(2): 0.0; S(6): 100.0	1.55031e+07	0.003	0.03308	24.27	0.0121586	2	1094.35	0.316064	7.83828	0
High	AKsPQPPVEEEDEHFDDTVVcLDTYNcDLHFK	3	1	1	Q00839	S3(Phospho); C21(Carbamidomethyl); C27(Carbamidomethyl)	0	S(3): 100.0; T(18): 0.0; T(24): 0.0; Y(25): 0.0	2.25973e+08	0	3.777e-14	61.29	2.97579e-05	4	3914.67	2.58572	23.8496	1
High	sSsPVNVK	5	1	1	Q00839	N-Term(Acetyl); S3(Phospho)	0	S(1): 0.0; S(2): 50.0; S(3): 50.0	1.64428e+08	0	0.001729	56.63	1.94457e-05	2	939.419	0.502977	13.7371	0
High	sSsPVNVKK	1	1	1	Q00839	N-Term(Acetyl); S3(Phospho)	0	S(1): 0.0; S(2): 0.0; S(3): 100.0	1.30791e+08	0.003	0.03902	38.08	0.00284742	2	1067.51	0.157406	8.08106	1
High	TIGGGDDsFNTFFSETGAGK	1	5	2	P68363;Q9BQE3	S8(Phospho)	0	T(1): 0.0; S(8): 98.5; T(11): 1.5; S(14): 0.0; T(16): 0.0	50679942	0	1.106e-06	46.07	0.000596921	2	2087.86	0.443929	28.6173	0
High	VTKNEEPsEEEIDAPKPK	2	1	1	Q9NR30	S8(Phospho)	0	T(2): 0.0; S(8): 100.0	2.92854e+06	0	0.001142	16.49	0.723652	3	2119.98	0.91897	9.03811	2
High	NEEPsEEEIDAPKPK	2	1	1	Q9NR30	S5(Phospho)	0	S(5): 100.0	1.56934e+08	0	7.427e-08	79.44	2.81563e-07	2	1791.77	0.930309	10.9705	1
High	KKAEPSEVDMNsPK	1	1	1	Q9NR30	S12(Phospho)	0	S(6): 0.0; S(12): 100.0	1.28799e+07	0	3.383e-07	44.71	0.000823188	3	1639.74	0.358775	5.99576	2
High	KAEPSEVDMNsPK	1	1	1	Q9NR30	S11(Phospho)	0	S(5): 0.0; S(11): 100.0	3.24537e+07	0	2.695e-10	78.51	2.93837e-07	2	1511.65	0.882126	7.91892	1
High	KKEEPSQNDIsPK	2	1	1	Q9NR30	S11(Phospho)	0	S(6): 0.0; S(11): 100.0	1.44513e+08	0	2.353e-09	79.59	2.63212e-07	2	1579.74	1.59957	5.40274	2
High	KEEPSQNDIsPK	1	1	1	Q9NR30	S10(Phospho)	0	S(5): 0.0; S(10): 100.0	5.25264e+06	0	0.004727	22.74	0.102165	2	1451.65	2.49705	6.20731	1
High	KAEPSEVDmNsPK	1	1	1	Q9NR30	M9(Oxidation); S11(Phospho)	0	S(5): 0.0; S(11): 100.0	6.47434e+06	0	0.00187	19.09	0.217026	2	1527.64	0.445889	5.54313	1
High	RAGDLLEDsPK	1	1	1	P51858	S9(Phospho)	0	S(9): 100.0	1.33506e+08	0	0.0001945	41.74	0.0011723	2	1280.59	-0.753114	10.9378	1
High	AGDLLEDsPK	2	1	1	P51858	S8(Phospho)	0	S(8): 100.0	1.53998e+08	0	6.455e-05	45.22	0.00042536	2	1124.49	0.160061	14.5597	0
High	AGDLLEDsPKRPK	5	1	1	P51858	S8(Phospho)	0	S(8): 100.0	4.9561e+08	0	2.322e-06	57.04	4.58657e-05	2	1505.74	2.57911	8.25846	2
High	KGNAEGSsDEEGKLVIDEPAK	1	1	1	P51858	S8(Phospho)	0	S(7): 0.0; S(8): 100.0	2.09732e+07	0	5.605e-06	23	0.168399	3	2253.03	0.813668	11.5431	2
High	KGNAEGssDEEGKLVIDEPAK	3	1	1	P51858	S7(Phospho); S8(Phospho)	0	S(7): 100.0; S(8): 100.0	1.03067e+08	0	3.447e-09	53.02	0.000149416	3	2333	0.331426	14.0925	2
High	GNAEGSsDEEGKLVIDEPAK	1	1	1	P51858	S7(Phospho)	0	S(6): 50.0; S(7): 50.0	2.54882e+07	0	5.32e-06	33.04	0.015295	3	2124.93	0.718771	14.6211	1
High	GNAEGssDEEGKLVIDEPAK	1	1	1	P51858	S6(Phospho); S7(Phospho)	0	S(6): 100.0; S(7): 100.0	3.04535e+08	0	1.196e-11	80.1	2.48218e-07	2	2204.9	1.10386	18.9396	1
High	GNAEGssDEEGKLVIDEPAKEK	1	1	1	P51858	S6(Phospho); S7(Phospho)	0	S(6): 100.0; S(7): 100.0	5.30844e+07	0	7e-06	26.41	0.0746248	3	2462.04	0.860477	14.5198	2
High	GNAEGsSDEEGKLVIDEPAKEK	2	1	1	P51858	S6(Phospho)	0	S(6): 50.0; S(7): 50.0	7.79279e+06	0	0.0002106	18.75	0.483402	3	2382.07	0.719411	11.7872	2
High	NSTPsEPGSGR	1	1	1	P51858	S5(Phospho)	0	S(2): 0.0; T(3): 0.0; S(5): 98.9; S(9): 1.1	3.28541e+06	0.001	0.01257	26.58	0.0271436	2	1168.46	-0.114746	5.75132	0
High	FEEESKEPVADEEEEDsDDDVEPITEFR	4	1	1	P54105	S17(Phospho)	0	S(5): 0.0; S(17): 100.0; T(25): 0.0	8.07288e+08	0	6.866e-16	104.98	9.64181e-10	3	3394.36	2.5776	23.2524	1
High	RAPsVANVGSHcDLSLK	1	1	1	P21333	S4(Phospho); C12(Carbamidomethyl)	0	S(4): 100.0; S(10): 0.0; S(15): 0.0	3.13778e+07	0	4.346e-09	35.76	0.00760544	3	1890.89	0.612786	12.821	1
High	APsVANVGSHcDLSLK	2	1	1	P21333	S3(Phospho); C11(Carbamidomethyl)	0	S(3): 100.0; S(9): 0.0; S(14): 0.0	3.08638e+07	0	1.669e-08	69.18	3.42415e-06	2	1734.79	1.61683	16.1157	0
High	FNEEHIPDSPFVVPVAsPSGDAR	1	1	1	P21333	S17(Phospho)	0	S(9): 0.0; S(17): 50.0; S(19): 50.0	5.94396e+06	0	0.0009305	15.16	1.05457	3	2547.16	0.992373	27.1178	0
High	AFGPGLQGGSAGsPAR	1	1	1	P21333	S13(Phospho)	0	S(10): 50.0; S(13): 50.0	1.42576e+07	0	1.007e-07	64.82	7.5151e-06	2	1509.68	-3.43208	15.825	0
High	ASSLSESsPPK	2	1	1	Q9UHB6	S8(Phospho)	0	S(2): 0.0; S(3): 0.0; S(5): 0.0; S(7): 0.0; S(8): 100.0	8.91277e+07	0	0.0001061	42.79	0.00132556	2	1169.51	0.913933	8.65729	0
High	ETPHsPGVEDAPIAK	2	1	1	Q9UHB6	S5(Phospho)	0	T(2): 0.0; S(5): 100.0	1.58234e+08	0	2.713e-09	68.72	3.3502e-06	2	1627.74	1.62125	11.8236	0
High	PLsPDSR	1	1	1	Q9UHB6	S3(Phospho)	0	S(3): 100.0; S(6): 0.0	1.51135e+07	0.001	0.01656	52.57	3.67978e-05	2	851.366	-0.310225	7.11199	0
High	LRsPPEALVQGR	1	1	1	Q9UHB6	S3(Phospho)	0	S(3): 100.0	5.87643e+06	0	0.0003255	44.88	0.000661553	3	1402.72	0.28121	13.113	1
High	EGHSLEMENENLVENGADsDEDDNSFLK	1	1	1	Q9UHB6	S19(Phospho)	0	S(4): 0.0; S(19): 100.0; S(25): 0.0	7.23494e+07	0	6.839e-12	76.49	6.59701e-07	3	3217.28	0.540974	23.8833	0
High	SEVQQPVHPKPLsPDSR	3	1	1	Q9UHB6	S13(Phospho)	0	S(1): 0.0; S(13): 100.0; S(16): 0.0	2.53393e+08	0	4.324e-09	71.55	1.7706e-06	2	1980.96	2.06623	10.0552	1
High	EGHSLEmENENLVENGADsDEDDNSFLK	1	1	1	Q9UHB6	M7(Oxidation); S19(Phospho)	0	S(4): 0.0; S(19): 100.0; S(25): 0.0	2.54288e+07	0	4.176e-06	37.62	0.00482619	3	3233.28	1.35592	21.6426	0
High	SGsGNFGGGR	1	1	1	P09651	S3(Phospho)	0	S(1): 0.0; S(3): 100.0	3.04161e+06	0	0.006997	34.19	0.00253409	2	975.368	-0.27465	5.86841	0
High	SEsPKEPEQLR	2	1	1	P09651	S3(Phospho)	0	S(1): 0.0; S(3): 100.0	3.70632e+08	0	0.001733	41.1	0.00173491	2	1379.63	3.87471	7.89281	1
High	SEsPKEPEQLRK	4	1	1	P09651	S3(Phospho)	0	S(1): 0.0; S(3): 100.0	9.89302e+07	0	1.048e-06	34.47	0.00769923	3	1507.71	-0.774243	5.64825	2
High	NQGGYGGSSSsSSYGSGR	2	1	1	P09651	S11(Phospho)	0	Y(5): 0.0; S(8): 0.0; S(9): 0.0; S(10): 0.8; S(11): 98.4; S(12): 0.8; S(13): 0.0; Y(14): 0.0; S(16): 0.0	9.08437e+06	0	3.6e-12	107.26	2.61225e-10	2	1774.67	2.4521	7.65749	0
High	sSGPYGGGGQYFAK	2	2	1	P09651	S1(Phospho)	0	S(1): 50.0; S(2): 50.0; Y(5): 0.0; Y(11): 0.0	4.06023e+06	0	4.32e-06	42.16	0.00085747	2	1455.59	0.559175	15.9329	0
High	sKsEsPKEPEQLR	1	1	1	P09651	N-Term(Acetyl); S3(Phospho); S5(Phospho)	0	S(1): 0.0; S(3): 100.0; S(5): 100.0	3.9508e+07	0	0.00238	36.29	0.00523968	2	1716.72	-0.0941781	11.5084	2
High	sKSESPKEPEQLR	1	1	1	P09651	N-Term(Acetyl); S1(Phospho)	0	S(1): 100.0; S(3): 0.0; S(5): 0.0	3.5578e+06	0.005	0.0705	19.52	0.279216	2	1636.76	-0.0105093	8.89227	2
High	IMAtPEQVGK	1	1	1	P12956	T4(Phospho)	0	T(4): 100.0	2.80393e+06	0	5.165e-05	37.92	0.0027767	2	1153.53	0.673022	12.6941	0
High	GNDPLTSsPGR	2	1	1	P49736	S8(Phospho)	0	T(6): 0.0; S(7): 0.0; S(8): 100.0	1.25767e+08	0	2.564e-05	45.43	0.000362319	2	1180.5	0.0821834	11.2757	0
High	RTDALTSsPGR	2	1	1	P49736	S8(Phospho)	0	T(2): 0.0; T(6): 0.0; S(7): 0.0; S(8): 100.0	1.10087e+08	0	0.0001031	47.98	0.000252365	2	1240.57	0.944112	6.1553	1
High	TDALTSsPGR	1	1	1	P49736	S7(Phospho)	0	T(1): 0.0; T(5): 0.0; S(6): 0.0; S(7): 100.0	1.15465e+07	0	0.0006076	42.14	0.000922522	2	1084.47	-1.35415	9.08339	0
High	RGLLYDsDEEDEERPAR	1	1	1	P49736	S7(Phospho)	0	Y(5): 1.6; S(7): 98.4	1.28338e+07	0	0.0003964	18.8	0.398114	3	2129.91	0.218015	12.4606	2
High	GLLYDsDEEDEERPAR	2	1	1	P49736	S6(Phospho)	0	Y(4): 0.0; S(6): 100.0	3.00502e+08	0	3.558e-07	62.67	1.58441e-05	2	1973.82	1.62585	15.9649	1
High	aESSESFTMASsPAQR	1	1	1	P49736	N-Term(Acetyl); S12(Phospho)	0	S(3): 0.0; S(4): 0.0; S(6): 0.0; T(8): 0.0; S(11): 0.0; S(12): 100.0	4.56771e+07	0	2.941e-07	57.97	3.66254e-05	2	1807.72	1.88483	24.1883	0
High	aESSESFTmASsPAQR	1	1	1	P49736	N-Term(Acetyl); M9(Oxidation); S12(Phospho)	0	S(3): 0.0; S(4): 0.0; S(6): 0.0; T(8): 0.0; S(11): 1.3; S(12): 98.7	2.80699e+07	0	1.739e-06	40.25	0.00170403	2	1823.71	-2.37161	19.708	0
High	IESDVQEPtEPEDDLDIMLGNK	1	1	1	P20042	T9(Phospho)	0	S(3): 0.0; T(9): 100.0	1.24965e+07	0	1.803e-05	29.34	0.0412683	2	2567.12	3.94407	31.1673	0
High	sGDEmIFDPTMSK	1	1	1	P20042	S1(Phospho); M5(Oxidation)	0	S(1): 100.0; T(10): 0.0; S(12): 0.0	2.67287e+06	0	0.0002758	39.22	0.00147199	2	1553.59	1.95539	22.5946	0
High	sGDEMIFDPTMSK	1	1	1	P20042	S1(Phospho)	0	S(1): 100.0; T(10): 0.0; S(12): 0.0	8.56652e+06	0	1.682e-08	71.41	9.86581e-07	2	1537.6	2.00301	26.3548	0
High	sGDEmIFDPTmSK	1	1	1	P20042	N-Term(Acetyl); S1(Phospho); M5(Oxidation); M11(Oxidation)	0	S(1): 100.0; T(10): 0.0; S(12): 0.0	4.62703e+07	0	0.0001806	36.01	0.00234321	2	1611.6	0.984239	28.5495	0
High	sGDEmIFDPTMSK	4	1	1	P20042	N-Term(Acetyl); S1(Phospho); M5(Oxidation)	0	S(1): 100.0; T(10): 0.0; S(12): 0.0	4.40874e+07	0	3.357e-05	55.08	3.57024e-05	2	1595.6	1.78544	31.4147	0
High	sGDEMIFDPTMSK	3	1	1	P20042	N-Term(Acetyl); S1(Phospho)	0	S(1): 100.0; T(10): 0.0; S(12): 0.0	1.04411e+08	0.001	0.01155	12.74	0.646512	2	1579.61	0.0526646	36.3084	0
High	aDVLDLHEAGGEDFAMDEDGDEsIHK	1	1	1	Q9Y5S9	N-Term(Acetyl); S23(Phospho)	0	S(23): 100.0	9995538	0	4.678e-06	38.81	0.0041035	3	2937.18	1.14215	28.0824	0
High	aDVLDLHEAGGEDFAmDEDGDEsIHK	1	1	1	Q9Y5S9	N-Term(Acetyl); M16(Oxidation); S23(Phospho)	0	S(23): 100.0	5.43006e+06	0	2.373e-05	36.61	0.00642814	3	2953.18	1.2871	26.2066	0
High	TIGGGDDsFNTFFSETGAGK	1	5	2	P68363;Q9BQE3	S8(Phospho)	0	T(1): 0.0; S(8): 98.5; T(11): 1.5; S(14): 0.0; T(16): 0.0	50679942	0	1.106e-06	46.07	0.000596921	2	2087.86	0.443929	28.6173	0
High	AYHEQLsVAEITNAcFEPANQMVK	1	5	1	P68363	S7(Phospho); C15(Carbamidomethyl)	0	Y(2): 0.0; S(7): 100.0; T(12): 0.0	8.33509e+06	0	8.54e-05	15.38	1.0952	3	2830.26	1.10628	25.5502	0
High	KEESEEsDDDmGFGLFD	3	2	2	P05387;P05386	S7(Phospho); M11(Oxidation)	0	S(4): 0.0; S(7): 100.0	1.04719e+08	0	6.494e-08	94.13	3.55458e-09	2	2045.72	1.83091	28.3617	1
High	KEESEEsDDDMGFGLFD	1	2	2	P05387;P05386	S7(Phospho)	0	S(4): 0.0; S(7): 100.0	2.25895e+08	0	5.711e-06	51.2	9.02707e-05	2	2029.72	-0.720067	32.3064	1
High	KEEsEEsDDDmGFGLFD	4	2	2	P05387;P05386	S4(Phospho); S7(Phospho); M11(Oxidation)	0	S(4): 100.0; S(7): 100.0	2.98626e+09	0	4.301e-07	49.89	4.87185e-05	2	2125.69	0.832672	37.2163	1
High	KEEsEEsDDDMGFGLFD	4	2	2	P05387;P05386	S4(Phospho); S7(Phospho)	0	S(4): 100.0; S(7): 100.0	4.15094e+09	0	1.053e-06	59.8	7.27754e-06	2	2109.69	0.627425	42.0291	1
High	ATVtPsPVK	1	1	1	Q9H1E3	T4(Phospho); S6(Phospho)	0	T(2): 0.0; T(4): 100.0; S(6): 100.0	8.50244e+06	0.008	0.105	23.16	0.0557933	2	1059.45	2.0313	13.5649	0
High	ATVtPsPVKGK	1	1	1	Q9H1E3	T4(Phospho); S6(Phospho)	0	T(2): 0.0; T(4): 100.0; S(6): 100.0	2.67029e+07	0.005	0.07773	24.08	0.0695697	2	1244.57	0.760461	9.49562	1
High	ATVTPsPVK	1	1	1	Q9H1E3	S6(Phospho)	0	T(2): 0.0; T(4): 0.0; S(6): 100.0	1.49353e+08	0.001	0.01611	41.34	0.00104668	2	979.485	-0.708713	10.1908	0
High	ATVTPsPVKGK	1	1	1	Q9H1E3	S6(Phospho)	0	T(2): 0.0; T(4): 0.0; S(6): 100.0	1.14252e+07	0	0.0002812	46.81	0.000368955	2	1164.6	1.25118	6.67239	1
High	EKTPSPKEEDEEPEsPPEK	1	1	1	Q9H1E3	S15(Phospho)	0	T(3): 0.0; S(5): 0.0; S(15): 100.0	6.70143e+06	0	0.005919	11.6	2.11354	3	2261.97	1.75366	7.43771	2
High	TPSPKEEDEEPEsPPEKK	2	1	1	Q9H1E3	S13(Phospho)	0	T(1): 0.0; S(3): 0.0; S(13): 100.0	9.03815e+07	0	0.001797	11.85	2.22064	3	2132.93	0.284708	6.32748	2
High	KVVDYSQFQEsDDADEDYGR	3	1	1	Q9H1E3	S11(Phospho)	0	Y(5): 0.0; S(6): 0.0; S(11): 100.0; Y(18): 0.0	1.07283e+08	0	1.383e-10	87.07	4.89858e-08	2	2445.97	-2.7747	16.758	1
High	VVDYSQFQEsDDADEDYGR	2	1	1	Q9H1E3	S10(Phospho)	0	Y(4): 0.0; S(5): 0.0; S(10): 100.0; Y(17): 0.0	4.33441e+08	0	2.361e-10	73.81	7.34082e-07	2	2317.88	1.28484	20.5415	0
High	DWEDDsDEDmSNFDR	1	1	1	Q15185	S6(Phospho); M10(Oxidation)	0	S(6): 100.0; S(11): 0.0	9.76487e+07	0	1.958e-07	69.37	4.04639e-07	2	1971.62	0.569776	19.9437	0
High	DWEDDsDEDMSNFDR	2	1	1	Q15185	S6(Phospho)	0	S(6): 100.0; S(11): 0.0	3.02492e+08	0	6.88e-10	92.22	2.63908e-09	2	1955.63	1.28251	24.4133	0
High	KEKtPELPEPSVK	1	1	1	Q8IYB3	T4(Phospho)	0	T(4): 100.0; S(11): 0.0	8.9033e+06	0	7.304e-07	21.97	0.130243	3	1561.79	0.505078	10.5975	2
High	RRtPtPPPR	1	1	1	Q8IYB3	T3(Phospho); T5(Phospho)	0	T(3): 100.0; T(5): 100.0	5.00542e+07	0.004	0.05967	23.38	0.0799005	3	1237.56	-0.515369	5.35077	2
High	EKtPELPEPSVK	3	1	1	Q8IYB3	T3(Phospho)	0	T(3): 100.0; S(10): 0.0	1.06154e+08	0	1.05e-05	58.4	3.14383e-05	2	1433.69	1.53825	13.5959	1
High	tAsPPPPPK	1	1	1	Q8IYB3	T1(Phospho); S3(Phospho)	0	T(1): 100.0; S(3): 100.0	1.39456e+07	0	0.001408	35.97	0.0025293	2	1051.43	0.388016	11.4021	0
High	tAsPPPPPKR	1	1	1	Q8IYB3	T1(Phospho); S3(Phospho)	0	T(1): 100.0; S(3): 100.0	26177788	0.001	0.02359	25.68	0.0413706	2	1207.53	0.198852	7.2483	1
High	tASPPPPPKR	1	1	1	Q8IYB3	T1(Phospho)	0	T(1): 0.0; S(3): 100.0	1.25416e+07	0.009	0.1134	22.24	0.102392	2	1127.56	0.124565	5.66726	1
High	KPPAPPsPVQsQsPSTNWSPAVPVKK	1	1	1	Q8IYB3	S7(Phospho); S11(Phospho); S13(Phospho)	0	S(7): 100.0; S(11): 85.9; S(13): 85.9; S(15): 9.4; T(16): 9.4; S(19): 9.4	1.11512e+07	0	0.0001814	23.01	0.182013	3	2951.36	3.54882	22.1716	2
High	APQTSSsPPPVR	1	1	1	Q8IYB3	S7(Phospho)	0	T(4): 0.0; S(5): 0.0; S(6): 0.0; S(7): 100.0	145356372	0	1.286e-05	56.37	6.08981e-05	2	1303.61	1.05563	9.30867	0
High	KVELsEsEEDKGGK	1	1	1	Q8IYB3	S5(Phospho); S7(Phospho)	0	S(5): 100.0; S(7): 100.0	6.81597e+06	0	0.003002	32.55	0.0117852	2	1694.7	2.48152	6.80595	2
High	KETEsEAEDNLDDLEK	1	1	1	Q8IYB3	S5(Phospho)	0	T(3): 0.0; S(5): 100.0	1.88916e+07	0	8.625e-10	91.27	1.9445e-08	2	1944.8	1.73778	14.6766	1
High	HRPsPPAtPPPK	4	1	1	Q8IYB3	S4(Phospho); T8(Phospho)	0	S(4): 100.0; T(8): 100.0	1.18519e+08	0	0.002898	32.65	0.0112181	3	1441.64	0.188345	6.71385	1
High	KAAsPsPQSVR	1	1	1	Q8IYB3	S4(Phospho); S6(Phospho)	0	S(4): 100.0; S(6): 100.0; S(9): 0.0	2.18475e+07	0.003	0.04201	25.6	0.0468219	2	1287.55	0.870962	6.66685	1
High	RQsPSPStRPIR	2	1	1	Q8IYB3	S3(Phospho); T8(Phospho)	0	S(3): 100.0; S(5): 0.8; S(7): 0.0; T(8): 99.1	6.46705e+07	0.001	0.02487	22.29	0.144304	2	1541.7	1.70343	6.36738	2
High	RLsPSAsPPR	1	1	1	Q8IYB3	S3(Phospho); S7(Phospho)	0	S(3): 100.0; S(5): 0.0; S(7): 100.0	5.37922e+07	0.001	0.01744	37.29	0.00281823	2	1227.53	0.923191	10.5202	1
High	AAsPsPQSVR	1	1	1	Q8IYB3	S3(Phospho); S5(Phospho)	0	S(3): 100.0; S(5): 100.0; S(8): 0.0	1.31733e+07	0.001	0.02655	19.36	0.144268	2	1159.46	1.28243	10.4315	0
High	RYsPsPPPK	2	1	1	Q8IYB3	S3(Phospho); S5(Phospho)	0	Y(2): 1.4; S(3): 98.6; S(5): 100.0	1.08876e+08	0.006	0.08443	16.12	0.279773	2	1188.49	2.03709	7.86561	1
High	RRsPsPAPPPR	2	1	1	Q8IYB3	S3(Phospho); S5(Phospho)	0	S(3): 100.0; S(5): 100.0	5.14784e+07	0	0.002798	25.29	0.064041	3	1377.62	0.0492548	5.4107	2
High	REsPsPAPKPR	1	1	1	Q8IYB3	S3(Phospho); S5(Phospho)	0	S(3): 100.0; S(5): 100.0	2.10343e+07	0	0.00546	22.79	0.108097	3	1381.6	0.485886	5.36839	2
High	AAsPSPQSVR	1	1	1	Q8IYB3	S3(Phospho)	0	S(3): 100.0; S(5): 0.0; S(8): 0.0	3.33067e+07	0	0.0004355	53.7	6.63331e-05	2	1079.49	0.380448	7.39137	0
High	RYsPPIQR	2	1	1	Q8IYB3	S3(Phospho)	0	Y(2): 0.0; S(3): 100.0	7.03509e+07	0.005	0.07608	18	0.317771	3	1096.53	0.296182	8.66111	1
High	REsPSPAPKPR	1	1	1	Q8IYB3	S3(Phospho)	0	S(3): 100.0; S(5): 0.0	2.58258e+07	0	4.239e-06	44.63	0.000662874	3	1301.64	1.47077	5.10673	2
High	VPKPEPIPEPKEPsPEK	1	1	1	Q8IYB3	S14(Phospho)	0	S(14): 100.0	2.86118e+07	0	3.467e-06	24.43	0.0805893	3	1977.99	0.0561633	11.8873	2
High	sPsPAPPPR	1	1	1	Q8IYB3	S1(Phospho); S3(Phospho)	0	S(1): 100.0; S(3): 100.0	2.54646e+07	0.005	0.08159	16.56	0.224112	2	1065.42	0.248181	11.7104	0
High	RStQGVTLTDLQEAEK	3	1	1	O14974	T3(Phospho)	0	S(2): 0.0; T(3): 100.0; T(7): 0.0; T(9): 0.0	1.60949e+07	0	1.075e-08	43.63	0.00133305	3	1855.88	0.461822	16.2471	1
High	RLAsTSDIEEK	1	1	1	O14974	S4(Phospho)	0	S(4): 99.3; T(5): 0.7; S(6): 0.0	6.6707e+06	0	0.0005817	39.89	0.00196412	2	1328.61	1.29405	8.84881	1
High	LAsTSDIEEK	1	1	1	O14974	S3(Phospho)	0	S(3): 100.0; T(4): 0.0; S(5): 0.0	1.40594e+07	0	3.561e-07	75.62	4.08495e-07	2	1172.51	0.568381	11.7787	0
High	SGsYSYLEER	1	1	1	O14974	S3(Phospho)	0	S(1): 0.0; S(3): 100.0; Y(4): 0.0; S(5): 0.0; Y(6): 0.0	7.71479e+06	0	1.157e-05	56.57	2.43423e-05	2	1270.5	-0.429561	15.4933	0
High	TGsYGALAEITASK	1	1	1	O14974	S3(Phospho)	0	T(1): 0.0; S(3): 100.0; Y(4): 0.0; T(11): 0.0; S(13): 0.0	1.61535e+07	0	3.613e-09	71.57	1.82516e-06	2	1448.67	0.0810996	22.9601	0
High	LAsTSDIEEKENR	2	1	1	O14974	S3(Phospho)	0	S(3): 49.7; T(4): 49.7; S(5): 0.6	1.88593e+06	0	0.003321	25.96	0.0607163	2	1571.7	2.59586	9.56375	1
High	VQGEAVSNIQENTQTPTVQEEsEEEEVDETGVEVK	10	2	1	Q13765	S22(Phospho)	0	S(7): 0.0; T(13): 0.0; T(15): 0.0; T(17): 0.0; S(22): 100.0; T(30): 0.0	9.89386e+08	0	9.745e-15	100.48	3.93513e-09	3	3940.75	3.12808	22.8573	0
High	SNtPESIAETPPAR	2	1	1	Q9Y4H2	T3(Phospho)	0	S(1): 0.0; T(3): 100.0; S(6): 0.0; T(10): 0.0	3.45816e+06	0	3.464e-06	56.11	5.77979e-05	2	1549.69	0.182336	14.6817	0
High	SSEGGVGVGPGGGDEPPtSPR	2	1	1	Q9Y4H2	T18(Phospho)	0	S(1): 0.0; S(2): 0.0; T(18): 50.0; S(19): 50.0	1.07694e+07	0	9.124e-06	23.07	0.127979	2	1975.84	1.72015	14.6612	0
High	PVSVAGsPLsPGPVR	1	1	1	Q9Y4H2	S7(Phospho); S10(Phospho)	0	S(3): 0.0; S(7): 100.0; S(10): 100.0	8.13739e+06	0	0.002764	22.58	0.137743	2	1579.73	-0.145866	25.1081	0
High	HNSAsVENVSLR	1	1	1	Q9Y4H2	S5(Phospho)	0	S(3): 0.0; S(5): 100.0; S(10): 0.0	5.33451e+06	0	0.002294	27.69	0.0308091	2	1392.63	1.03339	10.4514	0
High	TYsLTTPAR	1	1	1	Q9Y4H2	S3(Phospho)	0	T(1): 0.0; Y(2): 0.0; S(3): 100.0; T(5): 0.0; T(6): 0.0	8.85932e+06	0	0.0005877	50.22	0.000114073	2	1089.5	-0.145184	14.5819	0
High	RVsGDAAQDLDR	1	1	1	Q9Y4H2	S3(Phospho)	0	S(3): 100.0	1.53663e+07	0	8.557e-05	43.94	0.000722525	2	1382.61	0.833956	8.20786	1
High	TAsEGDGGAAAGAAAAGAR	2	1	1	Q9Y4H2	S3(Phospho)	0	T(1): 0.0; S(3): 100.0	1.77381e+07	0	1.306e-11	120.95	1.67937e-11	2	1611.68	1.19239	10.351	0
High	SKsQSSGSSATHPISVPGAR	1	1	1	Q9Y4H2	S3(Phospho)	0	S(1): 0.6; S(3): 48.5; S(5): 48.5; S(6): 0.6; S(8): 0.6; S(9): 0.6; T(11): 0.6; S(15): 0.0	6.14889e+06	0	1.505e-05	20.18	0.309407	3	2020.95	1.39226	8.57972	1
High	PVSVAGSPLsPGPVR	1	1	1	Q9Y4H2	S10(Phospho)	0	S(3): 0.0; S(7): 0.0; S(10): 100.0	9.28104e+06	0	9.76e-08	41.72	0.00146372	2	1499.76	-0.464276	21.0267	0
High	sPGEYINIDFGEPGAR	1	1	1	Q9Y4H2	S1(Phospho)	0	S(1): 100.0; Y(5): 0.0	1.2115e+07	0	2.058e-08	54.77	8.53572e-05	2	1801.78	0.944154	28.1387	0
High	YGPADVEDTTGSGATDSKDDDDIDLFGsDDEEESEEAK	1	1	1	P24534	S28(Phospho)	0	Y(1): 0.0; T(9): 0.0; T(10): 0.0; S(12): 0.0; T(15): 0.0; S(17): 0.0; S(28): 100.0; S(34): 0.0	2.17083e+08	0	3.669e-09	47.35	0.000484123	3	4104.59	0.752253	25.7535	1
High	YGPADVEDTTGSGATDSKDDDDIDLFGsDDEEESEEAKR	13	1	1	P24534	S28(Phospho)	0	Y(1): 0.0; T(9): 0.0; T(10): 0.0; S(12): 0.0; T(15): 0.0; S(17): 0.0; S(28): 100.0; S(34): 0.0	1.54909e+09	0	2.55e-13	52.81	0.000174097	4	4260.7	1.44137	22.631	2
High	DDDDIDLFGsDDEEESEEAK	1	1	1	P24534	S10(Phospho)	0	S(10): 98.7; S(16): 1.3	3.76169e+06	0	0.01022	29.19	0.0134362	2	2352.83	-3.26386	29.3402	0
High	DDDDIDLFGsDDEEESEEAKR	2	1	1	P24534	S10(Phospho)	0	S(10): 100.0; S(16): 0.0	27679855	0	7.385e-11	62.94	1.0773e-05	2	2508.95	2.37023	23.5253	1
High	SSGNSSSSGSGSGSTSAGsSSPGAR	3	1	1	Q12797	S19(Phospho)	0	S(1): 0.0; S(2): 0.0; S(5): 0.0; S(6): 0.0; S(7): 0.0; S(8): 0.0; S(10): 0.0; S(12): 0.0; S(14): 0.0; T(15): 0.0; S(16): 0.0; S(19): 33.3; S(20): 33.3; S(21): 33.3	1.78059e+07	0	1.224e-08	48.01	0.000322575	2	2182.85	2.26888	5.37353	0
High	PLPPAAIEsPAVAAPAYSR	1	1	1	P04792	S9(Phospho)	0	S(9): 100.0; Y(17): 0.0; S(18): 0.0	14345900	0	0.001066	13.88	0.959716	3	1957.98	1.41574	24.7751	0
High	QLsSGVSEIR	4	1	1	P04792	S3(Phospho)	0	S(3): 100.0; S(4): 0.0; S(7): 0.0	4.30596e+08	0	2.745e-05	57.53	3.71751e-05	2	1155.54	-0.543217	14.888	0
High	GFGDGYNGYGGGPGGGNFGGsPGYGGGR	2	1	1	P22626	S21(Phospho)	0	Y(6): 0.0; Y(9): 0.0; S(21): 100.0; Y(24): 0.0	1.59992e+07	0	8.885e-06	21.76	0.169702	3	2575.01	1.12308	22.4953	0
High	TGSEssQTGTSTTSSR	1	1	1	P23588	S5(Phospho); S6(Phospho)	0	T(1): 50.0; S(3): 50.0; S(5): 0.0; S(6): 100.0; T(8): 0.0; T(10): 0.0; S(11): 0.0; T(12): 0.0; T(13): 0.0; S(14): 0.0; S(15): 0.0	5.88194e+06	0	1.076e-09	74.59	3.28422e-07	2	1733.63	1.93984	7.10172	0
High	TGsESSQTGTSTTSSR	2	1	1	P23588	S3(Phospho)	0	T(1): 0.0; S(3): 100.0; S(5): 0.0; S(6): 0.0; T(8): 0.0; T(10): 0.0; S(11): 0.0; T(12): 0.0; T(13): 0.0; S(14): 0.0; S(15): 0.0	2.86822e+07	0	3.387e-14	118.6	2.43638e-11	2	1653.66	1.60429	5.44618	0
High	TIsLTDFLAEDGGTGGGSTYVSK	1	1	1	P23588	S3(Phospho)	0	T(1): 1.9; S(3): 98.1; T(5): 0.0; T(14): 0.0; S(18): 0.0; T(19): 0.0; Y(20): 0.0; S(22): 0.0	1.08906e+07	0	0.002313	15.87	0.895522	2	2356.07	3.35049	32.802	0
High	SQSSDTEQQsPTSGGGK	1	1	1	P23588	S10(Phospho)	0	S(1): 0.0; S(3): 0.0; S(4): 0.0; T(6): 0.0; S(10): 100.0; T(12): 0.0; S(13): 0.0	9.01309e+06	0	3.664e-07	51.11	0.000139016	2	1760.7	1.21773	5.39588	0
High	EEDcHsPTSKPPKPDQPLK	1	1	1	P23588	C4(Carbamidomethyl); S6(Phospho)	0	S(6): 33.3; T(8): 33.3; S(9): 33.3	1.30723e+07	0	0.001267	18.76	0.43905	4	2270.02	0.549035	7.02985	2
High	GLQLtPGIGGmQQHFFDDEDR	1	1	1	P12270	T5(Phospho); M11(Oxidation)	0	T(5): 100.0	7.95626e+06	0	2.222e-06	30.81	0.0282564	3	2457.05	-0.378702	25.0637	0
High	TVPStPTLVVPHR	3	1	1	P12270	T5(Phospho)	0	T(1): 0.0; S(4): 0.0; T(5): 100.0; T(7): 0.0	3.91056e+07	0	2.95e-08	71.11	1.54892e-06	2	1483.77	1.30352	17.0981	0
High	GAILSEEELAAMsPTAAAVAK	1	1	1	P12270	S13(Phospho)	0	S(5): 0.0; S(13): 98.9; T(15): 1.1	3.96907e+06	0	1.084e-05	36.3	0.00675138	2	2110.02	2.57932	27.9081	0
High	EGVQGPLNVsLSEEGK	1	1	1	P12270	S10(Phospho)	0	S(10): 99.1; S(12): 0.9	5.14694e+06	0	3.909e-07	62.23	1.57382e-05	2	1722.79	-1.66976	22.896	0
High	TDGFAEAIHsPQVAGVPR	2	1	1	P12270	S10(Phospho)	0	T(1): 0.0; S(10): 100.0	1.02302e+08	0	2.758e-14	92.97	1.57959e-08	2	1931.91	2.5059	20.0881	0
High	NIIHGsDSVK	1	2	1	P22392	S6(Phospho)	0	S(6): 100.0; S(8): 0.0	3.1857e+06	0	0.0009696	37.18	0.00322552	2	1149.53	0.259877	7.62732	0
High	ASAVSELsPR	2	1	1	Q9Y2W1	S8(Phospho)	0	S(2): 0.0; S(5): 0.0; S(8): 100.0	1.28453e+08	0	0.000128	46.37	0.000450969	2	1096.5	0.764028	12.179	0
High	WAHDKFsGEEGEIEDDEsGTENR	2	1	1	Q9Y2W1	S7(Phospho); S18(Phospho)	0	S(7): 100.0; S(18): 98.3; T(20): 1.7	9.06089e+06	0	0.0008135	29.57	0.0206463	3	2797.04	2.21794	15.2722	1
High	WAHDKFsGEEGEIEDDEsGTENREEK	1	1	1	Q9Y2W1	S7(Phospho); S18(Phospho)	0	S(7): 100.0; S(18): 99.9; T(20): 0.1	2.16884e+07	0.001	0.01403	12.8	1.19656	3	3183.21	1.27959	12.8982	2
High	WAHDKFsGEEGEIEDDESGTENR	1	1	1	Q9Y2W1	S7(Phospho)	0	S(7): 100.0; S(18): 0.0; T(20): 0.0	6.50011e+06	0	5.943e-06	19.32	0.308748	3	2717.06	0.449451	13.663	1
High	RIDIsPSTFR	1	1	1	Q9Y2W1	S5(Phospho)	0	S(5): 99.1; S(7): 0.0; T(8): 0.9	4.19233e+07	0	0.0004659	49.09	0.000223192	2	1271.62	4.796	17.3385	1
High	IDIsPSTFR	2	1	1	Q9Y2W1	S4(Phospho)	0	S(4): 100.0; S(6): 0.0; T(7): 0.0	2.14106e+08	0	0.0003543	47.27	0.000285937	2	1115.51	-0.0727087	22.3914	0
High	GSFsDTGLGDGK	1	1	1	Q9Y2W1	S4(Phospho)	0	S(2): 0.0; S(4): 100.0; T(6): 0.0	1.81236e+07	0	1.101e-05	41.94	0.00130826	2	1220.48	0.0406361	14.8418	0
High	ERsPALKsPLQSVVVR	2	1	1	Q9Y2W1	S3(Phospho); S8(Phospho)	0	S(3): 100.0; S(8): 100.0; S(12): 0.0	5.44194e+07	0	5.376e-06	35.79	0.00649856	3	1925.96	1.38888	18.6072	2
High	FSGEEGEIEDDEsGTENREEKDNIQPTTE	2	1	1	Q9Y2W1	S13(Phospho)	0	S(2): 100.0; S(13): 0.0; T(15): 0.0; T(27): 0.0; T(28): 0.0	4.79438e+07	0	4.149e-06	31.08	0.0253835	3	3364.34	-1.73141	15.6832	2
High	sPVGKsPPSTGSTYGSSQK	1	1	1	Q9Y2W1	S1(Phospho); S6(Phospho)	0	S(1): 100.0; S(6): 100.0; S(9): 0.0; T(10): 0.0; S(12): 0.0; T(13): 0.0; Y(14): 0.0; S(16): 0.0; S(17): 0.0	8.11856e+06	0.001	0.01677	15.67	0.720911	2	2011.85	2.5925	10.4623	1
High	sPPSTGSTYGSSQK	1	1	1	Q9Y2W1	S1(Phospho)	0	S(1): 100.0; S(4): 0.0; T(5): 0.0; S(7): 0.0; T(8): 0.0; Y(9): 0.0; S(11): 0.0; S(12): 0.0	2.35038e+07	0	5.994e-11	85.69	4.76151e-08	2	1463.61	2.0822	7.518	0
High	EELMssDLEETAGSTSIPK	1	1	1	O00567	S5(Phospho); S6(Phospho)	0	S(5): 98.2; S(6): 98.2; T(11): 3.3; S(14): 0.1; T(15): 0.1; S(16): 0.1	8.00633e+06	0	0.0004924	21.04	0.171576	2	2183.87	-1.43699	29.5115	0
High	EELMsSDLEETAGSTSIPK	4	1	1	O00567	S5(Phospho)	0	S(5): 98.9; S(6): 1.1; T(11): 0.0; S(14): 0.0; T(15): 0.0; S(16): 0.0	7.94467e+07	0	7.513e-11	74.05	1.17081e-06	2	2103.91	1.53612	24.6797	0
High	SFSKEELMSsDLEETAGSTSIPK	4	1	1	O00567	S10(Phospho)	0	S(1): 0.0; S(3): 0.0; S(9): 50.0; S(10): 50.0; T(15): 0.0; S(18): 0.0; T(19): 0.0; S(20): 0.0	3.54152e+07	0	1.36e-09	63.2	1.66085e-05	3	2553.13	1.19983	22.2392	1
High	sTPKEETVNDPEEAGHR	3	1	1	O00567	S1(Phospho)	0	S(1): 50.0; T(2): 50.0; T(7): 0.0	4.442e+06	0	2.186e-05	37.85	0.00433116	3	1975.84	0.863584	6.75894	1
High	SFSKEELmSsDLEETAGSTSIPK	2	1	1	O00567	M8(Oxidation); S10(Phospho)	0	S(1): 0.0; S(3): 0.0; S(9): 50.0; S(10): 50.0; T(15): 0.0; S(18): 0.0; T(19): 0.0; S(20): 0.0	1.63708e+07	0	4.874e-08	50.83	0.00029283	3	2569.13	0.724649	19.4827	1
High	EELmSsDLEETAGSTSIPK	4	1	1	O00567	M4(Oxidation); S6(Phospho)	0	S(5): 50.0; S(6): 50.0; T(11): 0.0; S(14): 0.0; T(15): 0.0; S(16): 0.0	3.50606e+07	0	2.147e-11	80.06	2.95884e-07	2	2119.91	5.19004	21.233	0
High	QPLLLsEDEEDTKR	2	2	1	Q99613	S6(Phospho)	0	S(6): 100.0; T(12): 0.0	7.98945e+07	0	9.824e-08	55.39	8.68649e-05	3	1752.81	2.21581	15.3842	1
High	GEGDIHENVDTDLPGSLGQSEEKPVPAAPVPsPVAPAPVPSR	1	1	1	Q9UK76	S32(Phospho)	0	T(11): 0.0; S(16): 0.0; S(20): 0.0; S(32): 100.0; S(41): 0.0	7.71066e+07	0	1.992e-08	18.5	0.389154	4	4293.08	1.04682	25.1749	1
High	RNsSEASSGDFLDLK	3	1	1	Q9UK76	S3(Phospho)	0	S(3): 50.0; S(4): 50.0; S(7): 0.0; S(8): 0.0	5.15011e+08	0	6.331e-11	84.4	8.6231e-08	2	1705.74	-0.140068	17.6935	1
High	NsSEASSGDFLDLK	1	1	1	Q9UK76	S2(Phospho)	0	S(2): 100.0; S(3): 0.0; S(6): 0.0; S(7): 0.0	1.39502e+07	0	4.711e-10	104.62	6.7303e-10	2	1549.64	0.741871	23.8686	0
High	DVtPPPETEVVLIK	1	1	1	P27816	T3(Phospho)	0	T(3): 100.0; T(8): 0.0	1.03202e+08	0	3.559e-05	34.29	0.00791332	2	1616.82	1.38663	28.0768	0
High	DGVLTLANNVtPAK	1	1	1	P27816	T11(Phospho)	0	T(5): 0.0; T(11): 100.0	3.7841e+06	0	2.468e-06	33.17	0.0102655	2	1492.74	0.162182	24.2368	0
High	ELPPsPEKK	2	1	1	P27816	S5(Phospho)	0	S(5): 100.0	5.18261e+07	0.001	0.02368	28.27	0.023234	2	1104.53	0.457194	6.22457	1
High	DMEsPTKLDVTLAK	2	1	1	P27816	S4(Phospho)	0	S(4): 100.0; T(6): 0.0; T(11): 0.0	2.14969e+08	0	1.868e-09	77.35	4.85964e-07	2	1627.77	0.292523	20.7073	1
High	RAsPSKPASAPASR	1	1	1	P27816	S3(Phospho)	0	S(3): 99.9; S(5): 0.1; S(9): 0.0; S(13): 0.0	4.12583e+06	0.005	0.07113	12.55	1.2897	2	1462.72	0.878225	5.15708	2
High	DMsPLSETEMALGK	1	1	1	P27816	S3(Phospho)	0	S(3): 100.0; S(6): 0.0; T(8): 0.0	8.26477e+06	0	6.588e-10	65.13	5.24803e-06	2	1588.66	0.671054	29.4487	0
High	VGsLDNVGHLPAGGAVK	1	1	1	P27816	S3(Phospho)	0	S(3): 100.0	1.65341e+07	0	1.166e-05	37.12	0.00472606	2	1670.83	3.3411	17.1955	0
High	DmEsPTKLDVTLAK	3	1	1	P27816	M2(Oxidation); S4(Phospho)	0	S(4): 100.0; T(6): 0.0; T(11): 0.0	1.05636e+08	0	6.132e-05	29.6	0.0311948	2	1643.76	1.52662	18.1943	1
High	KcsLPAEEDSVLEK	1	1	1	P27816	C2(Carbamidomethyl); S3(Phospho)	0	S(3): 100.0; S(10): 0.0	2.0343e+07	0	1.071e-07	67.15	4.81881e-06	2	1684.75	0.374922	14.4014	1
High	ESVPEFPLsPPK	3	1	1	P16949	S9(Phospho)	0	S(2): 0.0; S(9): 100.0	2.53668e+08	0	0.001246	39.87	0.00211229	2	1406.66	0.647051	26.8761	0
High	RAsGQAFELILsPR	2	1	1	P16949	S3(Phospho); S12(Phospho)	0	S(3): 100.0; S(12): 100.0	1.73789e+07	0	0.001463	27.51	0.0479918	3	1704.79	-0.829791	27.702	1
High	RAsGQAFELILSPR	1	1	1	P16949	S3(Phospho)	0	S(3): 100.0; S(12): 0.0	7.63507e+06	0	0.0001565	35.31	0.00627162	3	1624.82	-1.57056	23.8153	1
High	ASGQAFELILsPR	2	1	1	P16949	S11(Phospho)	0	S(2): 0.0; S(11): 100.0	4.34718e+07	0	3.891e-07	60.41	2.0655e-05	2	1468.72	1.83516	28.0326	0
High	SKESVPEFPLsPPK	3	1	1	P16949	S11(Phospho)	0	S(1): 0.0; S(4): 0.0; S(11): 100.0	8.12693e+07	0	0.0003276	42.95	0.00122945	2	1621.79	1.58608	20.793	1
High	LTFDSSFsPNTGK	1	1	1	P21796	S8(Phospho)	0	T(2): 0.0; S(5): 0.0; S(6): 0.0; S(8): 100.0; T(11): 0.0	1.02788e+07	0	1.011e-05	46.17	0.000507247	2	1480.64	0.607785	21.6891	0
High	LTFDSSFsPNTGKK	1	1	1	P21796	S8(Phospho)	0	T(2): 0.0; S(5): 0.0; S(6): 0.0; S(8): 100.0; T(11): 0.0	8.73487e+06	0	1.007e-05	61.37	1.9513e-05	2	1608.73	1.69802	16.33	1
High	RSDVQEEsEGSDTDDNKDsAAFEDNEVQDEFLEK	6	1	1	Q9UIG0	S8(Phospho); S19(Phospho)	0	S(2): 0.0; S(8): 50.0; S(11): 50.0; T(13): 50.0; S(19): 50.0	1.39283e+07	0	1.868e-05	29.83	0.0287538	3	4037.56	0.138478	23.1203	2
High	LAEDEGDsEPEAVGQSR	1	1	1	Q9UIG0	S8(Phospho)	0	S(8): 100.0; S(16): 0.0	2.93607e+07	0	7.136e-13	133.94	8.79947e-13	2	1868.76	1.37923	12.6762	0
High	DHTVsGDEDYcPR	1	1	1	Q9UIG0	S5(Phospho); C11(Carbamidomethyl)	0	T(3): 0.8; S(5): 99.2; Y(10): 0.0	7.06285e+06	0	1.848e-06	70.35	7.33444e-07	2	1630.59	1.81859	10.2065	0
High	SLSGsPLK	1	1	1	Q9UIG0	S5(Phospho)	0	S(1): 0.0; S(3): 0.0; S(5): 100.0	4.76979e+06	0	0.009762	36.53	0.00285695	2	868.417	-0.378128	10.8047	0
High	NKPGPNIEsGNEDDDASFK	2	1	1	O60841	S9(Phospho)	0	S(9): 100.0; S(17): 0.0	1.57164e+08	0	1.439e-10	103.06	1.33711e-09	2	2113.87	1.17342	12.0938	1
High	KQSFDDNDsEELEDKDSK	1	1	1	O60841	S9(Phospho)	0	S(3): 0.0; S(9): 100.0; S(17): 0.0	1.76779e+07	0	1.572e-09	60.04	2.27396e-05	3	2208.88	1.11691	8.21	2
High	VEMYsGsDDDDDFNKLPK	1	1	1	O60841	S5(Phospho); S7(Phospho)	0	Y(4): 1.3; S(5): 98.7; S(7): 100.0	8.04969e+07	0	3.7e-07	50.05	0.000148777	2	2234.83	4.05309	22.9866	1
High	QsFDDNDSEELEDKDSK	2	1	1	O60841	S2(Phospho)	0	S(2): 100.0; S(8): 0.0; S(16): 0.0	4.00709e+06	0	0.00012	25.49	0.0478817	2	2080.79	0.781135	11.2018	1
High	SFGTRPLsSGFSPEEAQQQDEEFEK	1	1	1	Q9C0C2	S8(Phospho)	0	S(1): 0.0; T(4): 1.7; S(8): 98.2; S(9): 0.0; S(12): 0.0	2.68302e+07	0	5.342e-09	62.1	2.38006e-05	3	2910.25	1.4873	21.3992	1
High	VPssDEEVVEEPQSR	1	1	1	Q9C0C2	S3(Phospho); S4(Phospho)	0	S(3): 100.0; S(4): 100.0; S(14): 0.0	8.19619e+06	0	3.223e-05	33.04	0.00792065	2	1846.72	1.76295	19.6361	0
High	RPsQGPPAR	1	1	1	Q9C0C2	S3(Phospho)	0	S(3): 100.0	0	0.009	0.1197	15.62	0.422202	2	1045.49	0.721386	4.21868	1
High	RFsEGVLQSPSQDQEK	2	1	1	Q9C0C2	S3(Phospho)	0	S(3): 100.0; S(9): 0.0; S(11): 0.0	1.71221e+07	0	3.535e-06	27.35	0.0563276	3	1914.86	-0.437442	13.8262	1
High	RDsLGAYASQDANEQGQDLGK	1	1	1	Q9C0C2	S3(Phospho)	0	S(3): 100.0; Y(7): 0.0; S(9): 0.0	4.54787e+06	0.001	0.01529	12.95	1.75926	2	2302.99	0.224023	14.1773	1
High	AsPEPPGPESSSR	1	1	1	Q9C0C2	S2(Phospho)	0	S(2): 100.0; S(10): 0.0; S(11): 0.0; S(12): 0.0	3.75494e+07	0	0.009537	17.41	0.278682	2	1377.57	0.356341	9.51049	0
High	GsGGLFSPSTAHVPDGALGQR	1	1	1	Q9C0C2	S2(Phospho)	0	S(2): 100.0; S(7): 0.0; S(9): 0.0; T(10): 0.0	6.0152e+06	0	0.0001337	24.6	0.101594	3	2090.97	0.145005	21.6323	0
High	DsLGAYASQDANEQGQDLGK	1	1	1	Q9C0C2	S2(Phospho)	0	S(2): 100.0; Y(6): 0.0; S(8): 0.0	5.16159e+06	0	1.607e-06	38.88	0.00337138	2	2146.89	-0.0795181	19.2927	0
High	LDSPPPSPITEAsEAAEAAEAGNLAVSSR	1	1	1	Q9C0C2	S13(Phospho)	0	S(3): 97.7; S(7): 2.3; T(10): 0.1; S(13): 0.0; S(27): 0.0; S(28): 0.0	2.14275e+07	0	0.000206	13.48	1.70748	3	2917.35	0.413755	32.9628	0
High	YESQEPLAGQEsPLPLATR	1	1	1	Q9C0C2	S12(Phospho)	0	Y(1): 0.0; S(3): 0.0; S(12): 100.0; T(18): 0.0	4.42049e+06	0	0.0007452	17.38	0.58225	3	2166.01	0.576266	24.4364	0
High	VSGAGFSPSsK	3	1	1	Q9C0C2	S10(Phospho)	0.0476	S(2): 0.0; S(7): 0.0; S(9): 0.0; S(10): 100.0	5.0176e+06	0	0.0001923	59.66	1.49779e-05	2	1103.48	-0.513234	10.7455	0
High	sQEADVQDWEFR	1	1	1	Q9C0C2	S1(Phospho)	0	S(1): 100.0	7.84083e+06	0	3.907e-10	82.77	8.87788e-08	2	1589.63	1.08537	23.4296	0
High	TEAQDLcRAsPEPPGPESSSR	1	1	1	Q9C0C2	C7(Carbamidomethyl); S10(Phospho)	0	T(1): 0.0; S(10): 100.0; S(18): 0.0; S(19): 0.0; S(20): 0.0	1.06942e+07	0	9.23e-05	15.65	0.86718	3	2351	0.409908	12.2475	1
High	asGVAVSDGVIK	2	1	1	P23528	N-Term(Acetyl); S2(Phospho)	0	S(2): 100.0; S(7): 0.0	2.04992e+08	0	3.636e-08	74.58	6.74033e-07	2	1224.59	0.18181	26.8413	0
High	sGEDEQQEQTIAEDLVVTK	3	1	1	Q9UQ80	N-Term(Acetyl); S1(Phospho)	0	S(1): 100.0; T(10): 0.0; T(18): 0.0	7.08611e+07	0	0.0002345	46.25	0.000853695	2	2240.98	1.76683	33.6005	0
High	KPGPPLsPEIRsPAGsPELR	1	1	1	Q96JM3	S7(Phospho); S12(Phospho); S16(Phospho)	0	S(7): 100.0; S(12): 100.0; S(16): 100.0	3.19081e+07	0	0.0001533	16.22	0.839316	3	2325.05	0.577227	21.1356	2
High	KPGPPLsPEIR	1	1	1	Q96JM3	S7(Phospho)	0	S(7): 100.0	1.72532e+07	0	0.0001455	44.29	0.000681477	2	1270.66	0.178662	13.249	1
[truncated: 1,764 more rows]

## Sheet: Fe3O4@TiTA-Replicate 3
A2	Sequence	# PSMs	# Proteins	# Protein Groups	Protein Group Accessions	Modifications	ΔCn	phosphoRS Site Probabilities	Area	q-Value	PEP	IonScore	Exp Value	Charge	MH+ [Da]	ΔM [ppm]	RT [min]	# Missed Cleavages
[truncated: 2,026 more rows]

[truncated: 3 more sheets: TIO2 column-Replicate 1, TIO2 column-Replicate 2, TIO2 column-Replicate 3]
