# Supplementary material for: Magnetic metal phenolic networks: expanding the application of a promising nanoprobe to phosphoproteomics research
Source: Royal Society of Chemistry journal article supplement (doi:10.1039/d0cc04615a), 2020-01-01
Supplement: d0cc04615a2.pdf [file d0cc04615a2.pdf]

1 Magnetic metal phenolic networks: Expanding  
2 application of a promising nanoprobe to  
3 phosphoproteomics research

4  
5 Huimin Chu, <sup>a</sup> Haoyang Zheng, <sup>a</sup> Jizong Yao, <sup>a</sup> Nianrong Sun, <sup>b,\*</sup> Guoquan Yan, <sup>c</sup>  
6 and Chunhui Deng <sup>a, c\*</sup>

7 <sup>a</sup>: Department of Chemistry, Fudan University, Shanghai, 200433, China.

8 <sup>b</sup>: Department of Gastroenterology and Hepatology, Zhongshan Hospital, Fudan  
9 University, Shanghai, 200433, China.

10 <sup>c</sup>: Institutes of Biomedical Sciences, Collaborative Innovation Center of Genetics and  
11 Development, Fudan University, Shanghai, 200433, China.

## 12 **Experimental section**

13 **Materials.** Iron chloride hexahydrate ( $\text{FeCl}_3 \cdot 6\text{H}_2\text{O}$ ) and sodium acetate (NaAc) were  
14 purchased from Sinopharm Chemical Reagent Co., Ltd. Ethanol and methanol were  
15 purchased from GENERAL-REAGENT. Dihydroxy bis (Ammonium Lactato)  
16 Titanium (IV) (Ti-DBAL, 50 wt. % aqueous solution) and phenylmethanesulfonyl  
17 fluoride (PMSF) were bought from Alfa. Ethylene glycol was bought from Adamas.  
18 Tannic acid (TA), horseradish peroxidase (HRP), Immunoglobulin G (IgG), bovine  
19 serum albumin (BSA), 2,5-dihydroxybenzoic acid (DHB), trypsin from bovine  
20 pancreas, dithiothreitol (DTT), indoacetamide (IAA), trifluoroacetic acid (TFA), urea,  
21 thiourea and ammonium bicarbonate ( $\text{NH}_4\text{HCO}_3$ ) were bought from Sigma- Aldrich.  
22 Acetonitrile (ACN) was purchased from Merck. Human serum was provided by  
23 Shanghai Zhongshan Hospital from a healthy volunteer. Ultrapure water used in all  
24 aqueous solutions was purified by using a Milli-Q system (Millipore, Bedford, MA).  
25 All other reagents were analytical grade.

26 **Synthesis method of  $\text{Fe}_3\text{O}_4@\text{TiTA}$  nanoparticles.**  $\text{Fe}_3\text{O}_4$  nanoparticles were prepared  
27 via a solvothermal synthesis method according to our previous report.<sup>1</sup> In brief,  
28  $\text{FeCl}_3 \cdot 6\text{H}_2\text{O}$  (1.35 g) was dissolved with ethylene glycol (75 mL). Then, 3.6 g of NaAc  
29 was added. The obtained mixture was heated at 200 °C for 16 h. The obtained magnetic  
30 nanoparticles were washed by deionized water and ethanol several times and dried in a  
31 vacuum oven at 50 °C overnight.  $\text{Fe}_3\text{O}_4$ (30mg) were dispersed in 100 mL  $\text{H}_2\text{O}$  followed  
32 by 10 min of ultrasound. Next, the suspension was vigorously stirred after the individual  
33 additions of TA solution with 10 min stirring for each addition. Then a certain  
34 concentration of Ti-DBAL was added with 5 min stirring. The obtained  $\text{Fe}_3\text{O}_4@\text{TiTA}$   
35 nanoparticles were washed by deionized water four times and dried in a vacuum oven  
36 at 50 °C overnight.

37 **Synthesis method of  $\text{Fe}_3\text{O}_4@\text{FeTA}$  nanoparticles.**  $\text{Fe}_3\text{O}_4$  nanoparticles were  
38 prepared same as above.  $\text{Fe}_3\text{O}_4$  (30mg) were dispersed in 100 mL  $\text{H}_2\text{O}$  followed by 10  
39 min of ultrasound. Next, the suspension was vigorously stirred after the individual  
40 additions of  $\text{FeCl}_3$  with 10 min stirring for each addition. Then a certain concentration  
41 of TA solution was added with 5 min stirring. The obtained  $\text{Fe}_3\text{O}_4@\text{FeTA}$  nanoparticles

42 were washed by deionized water four times and dried in a vacuum oven at 50 °C  
43 overnight.

44 **Synthesis method of Fe<sub>3</sub>O<sub>4</sub>@ZrTA nanoparticles.** Fe<sub>3</sub>O<sub>4</sub> nanoparticles were  
45 prepared same as above. Fe<sub>3</sub>O<sub>4</sub> (30mg) were dispersed in 100 mL H<sub>2</sub>O followed by 10  
46 min of ultrasound. Next, the suspension was vigorously stirred after the individual  
47 additions of ZrCl<sub>4</sub> with 10 min stirring for each addition. Then a certain concentration  
48 of the TA solution was added with 5 min stirring. The obtained Fe<sub>3</sub>O<sub>4</sub>@ZrTA  
49 nanoparticles were washed by deionized water four times and dried in a vacuum oven  
50 at 50 °C overnight.

51 **Sample preparation of standard proteins and human serum.** 2 mg of β-casein was  
52 dissolved in 500 μL 50 mM NH<sub>4</sub>HCO<sub>3</sub> and denatured in boiling water for 10 min. After  
53 cooling down to room temperature, 500 μL Milli-Q was added and then trypsin was  
54 added with the ratio of trypsin: protein at 1: 40 (w/w). The solution was incubated at 37  
55 °C for 16 h. The 2 mg/mL β-casein was diluted to 0.5 mg/mL and stored at -20 °C for  
56 further use.

57 1 mL serum centrifuged for 10 min at the speed of 1738g. The supernatant was collected  
58 and stored at -20 °C for further utilization.

59 **Cell culture and lysis.** HeLa cells were cultured in DMEM with addition of 10% fetal  
60 bovine serum and 1% penicillin and streptomycin at 37 °C in 5% CO<sub>2</sub>. Cell lysates  
61 were collected in triple biological replicates. After cells were overgrown on culture  
62 dishes with a radius of 10 cm, the culture mediums were removed. Cells were washed  
63 with PBS (1x) twice and added by trypsin for two minutes. Whereafter, cells were  
64 blown down with the usage of PBS and transferred to a clear tube. The cells were  
65 washed using PBS (1x) twice at 170g for 2 min, followed by the addition of 500 μL  
66 lysate (7M urea, 2M thiourea, 1mM PMSF). The mixture was shaken vigorously for 5  
67 min and then underwent sonicate with an ultrasonic disintegrator for 15min. The  
68 supernatant was taken after centrifugation at 10000g for 15 min. The above solution  
69 was diluted with 50 mM ammonium bicarbonate until the concentration of urea was

70 lower than 0.1 M. The solution was transferred to a new tube and boiled for 10 minutes.  
71 The protein concentrations were determined via BCA protein assays. The concentration  
72 of protein was diluted to 10 µg/µL.  
73 500 µg protein was reduced with DTT at 10 mM final concentration at 50 °C for 1 h.  
74 Then concentrated IAA was mixed and reacted in the dark for 30 min at 55mM final  
75 concentration. Afterwards, DTT was used to consume excess IAA so that the total  
76 molar ratio of DTT to IAA was 1: 1, followed by the supplement of 10 µg trypsin to  
77 make sure the mass ratio of protein to trypsin was 50:1. Whereafter, a certain amount  
78 of 50 mM NH<sub>4</sub>HCO<sub>3</sub> was added to make the total volume of the system 100 µL and the  
79 reaction was carried out at 37 °C for 16 h. Finally, 1 µl of 10% TFA was added to  
80 stop the reaction to prevent excessive enzymatic hydrolysis. The protein digestion was  
81 stored at -80 °C for further use.

82 **Live subject statement.** All the experiments in this work were carried out in  
83 compliance with the ethical standards, and conducted according to the Declaration of  
84 Helsinki and approved by the Ethics Committee of Fudan University.

85

86 **Protocol of enrichment process.** Fe<sub>3</sub>O<sub>4</sub>@TiTA nanoparticles (100 µg) were dispersed  
87 in 100 µL loading buffer (ACN/H<sub>2</sub>O/TFA= 50/49/1, v/v/v) containing 100 fmol β-  
88 casein digests followed by incubation at 37 °C with 30 min. After that, the nanoparticles  
89 were separated from the mixture by using a magnet and washed with 200 µL loading  
90 buffer for three times to remove non-phosphopeptides. Then the captured  
91 phosphopeptides were eluted by 10 µL 0.4 M ammonium hydroxide for 30 min at 37  
92 °C. Eventually, the eluent was analyzed directly by matrix-assisted laser desorption  
93 ionization time-of-flight mass spectrometry (MALDI-TOF MS) with the help of 2,5-  
94 dihydroxybenzoic acid (DHB) (ACN/H<sub>2</sub>O/H<sub>3</sub>PO<sub>4</sub>, 50/49/1, V/V/V).

95 For phosphopeptide enrichment from real bio-samples, 10 µL of human serum  
96 supernatant was added in 100 µL loading buffer (ACN/H<sub>2</sub>O/TFA = 50/49/1, v/v/v),  
97 and then 200 µg Fe<sub>3</sub>O<sub>4</sub>@TiTA nanoparticles were added to the solution. The mixture

98 was incubated for 30 min at 37 °C. Then the deposition was washed with 200 µL  
99 loading buffer by magnetic separation three times. After that, phosphopeptides were  
100 eluted with 10 µL of eluting buffer (0.4 M ammonium hydroxide). Subsequently, the  
101 eluent was analyzed directly by matrix-assisted laser desorption ionization time-of-  
102 flight mass spectrometry (MALDI-TOF MS) with the help of DHB matrix.  
103 20 µL of HeLa digestion was added in 200 µL loading buffer (ACN/H<sub>2</sub>O/TFA =  
104 50/49/1, v/v/v), and then 400 µg Fe<sub>3</sub>O<sub>4</sub>@TiTA nanoparticles were added to the solution.  
105 The mixture was incubated for 40 min at 37 °C. Then the deposition was washed with  
106 200 µL loading buffer three times. After that, phosphopeptides were eluted with 30 µL  
107 of eluting buffer (0.4 M ammonium hydroxide) at 37 °C (2x30min). The samples were  
108 desalted, lyophilized and redissolved for Nano-LC-MS/MS analysis.

#### 109 **Nano-LC-ESI-MS/MS.**

110 First of all, solvent A (water containing 0.1% formic acid) and solvent B (ACN  
111 containing 0.1% formic acid) were prepared. The lyophilized eluent was dissolved with  
112 10 µL solvent A. The captured peptides were separated by Nano-LC, and on-line  
113 electrospray tandem mass spectrometry was used to analyze them. The experiments  
114 were performed on an EASY-nLC 1000 system (Thermo Fisher Scientific, Waltham,  
115 MA) connected to an Orbitrap Fusion mass spectrometer (Thermo Fisher Scientific,  
116 San Jose, CA) equipped with an online nano-electrospray ion source. A 5 µL peptide  
117 sample was loaded on the trap column (Thermo Scientific Acclaim PepMap C18, 100  
118 µm × 2 cm) and separated on the analytical column (Acclaim PepMap C18, 75 µm × 25  
119 cm) with a linear gradient, from 2% B to 40% B in 110 min. The column was re-  
120 equilibrated at initial conditions for 15 min with the column flow rate at 300 nL min<sup>-1</sup>  
121 and column temperature at 40 °C. A data-dependent mode was adopted in the Orbitrap  
122 Fusion mass spectrometer to switch automatically between MS and MS/MS  
123 acquisition. Survey full-scan MS spectra (m/z 350–1500) were gained in the Orbitrap  
124 with a mass resolution of 120 000 at m/z 200. The AGC target was set to 1000 000 with  
125 maximum injection time at 50 ms. MS/MS acquisition was performed in the Orbitrap  
126 with a cycle time of 3 s, the resolution was 15000 at m/z 200. The threshold value of

127 intensity was 50 000 and maximum injection time was 80 ms. Ions with charge states  
128 from 2+ to 5+ were sequentially fragmented by higher energy collisional dissociation  
129 (HCD) with a normalized collision energy (NCE) of 30%. The AGC target was set to  
130 100 000 with the isolation window at 1.8 m/z. In all cases, one microscan was recorded  
131 using dynamic exclusion of 21 seconds. MS/MS fixed first mass was set at 110.

#### 132 **Database search.**

133 The raw mass spectrometry data files were extracted by the Proteome Discoverer  
134 software (Thermo Fisher Scientific, version 1.4.0.288) with the MASCOT searching  
135 engine version 2.3.2. Human UniProtKB/Swiss-Prot database (Release 2015\_12, with  
136 20 199 sequences) was chosen as the database.

137 The Orbitrap Fusion instrument was applied to generate raw S3 files. Search parameters  
138 were precursor and fragment mass tolerance (10 ppm and 0.05 Da, respectively). The  
139 retained peptides contained at least seven amino acids. Carbamidomethyl on cysteine  
140 was set as a fixed modification. Variable modifications include oxidation (M) and  
141 phosphorylation (STY). The probability of phosphorylation site was calculated by the  
142 phosphoRS 3.0 algorithm. The target-decoy based strategy was used to control peptide  
143 level FDRs < 1%, which confirmed the reliability of the obtained results in this  
144 research.

#### 145 **Characterization**

146 The transmission electron microscopy (TEM) images of Fe<sub>3</sub>O<sub>4</sub>@TiTA nanoparticles  
147 were conducted on a JEOL 2011 transmission electron microscopy. Scanning electron  
148 microscopy (SEM) images were investigated with the usage of a Philips XL30 electron  
149 microscope and the element analysis was measured by energy dispersive X-ray (EDX)  
150 spectroscopy with a Philips XL30 electron microscope at 20 kV. Fourier transform  
151 infrared (FT-IR) spectrum was acquired on a Nicolet Fourier spectro photometer  
152 (Thermo Fisher). The zeta-potential and dynamic light scattering (DLS) were measured  
153 with the utilization of a Malvern Nano Z Zetasizer. Magnetization measurement was  
154 conducted on an S-(SQUID) VSM (Quantum Design, USA). All MALDI-TOF MS  
155 experiments were performed on AB Sciex 5800 MALDI TOF/TOFTM mass  
156 spectrometer (AB Sciex, USA) in a reflector positive mode with a 355 nm Nd-YAG

157 laser, 200 Hz frequency, and acceleration voltage of 20 kV. Thermogravimetric  
158 analysis (TGA) was operated by SDT Q600 thermogravimetric analyzer with nitrogen  
159 atmosphere, temperature range: 25-800 °C, heating rate: 10 °C·min<sup>-1</sup>.

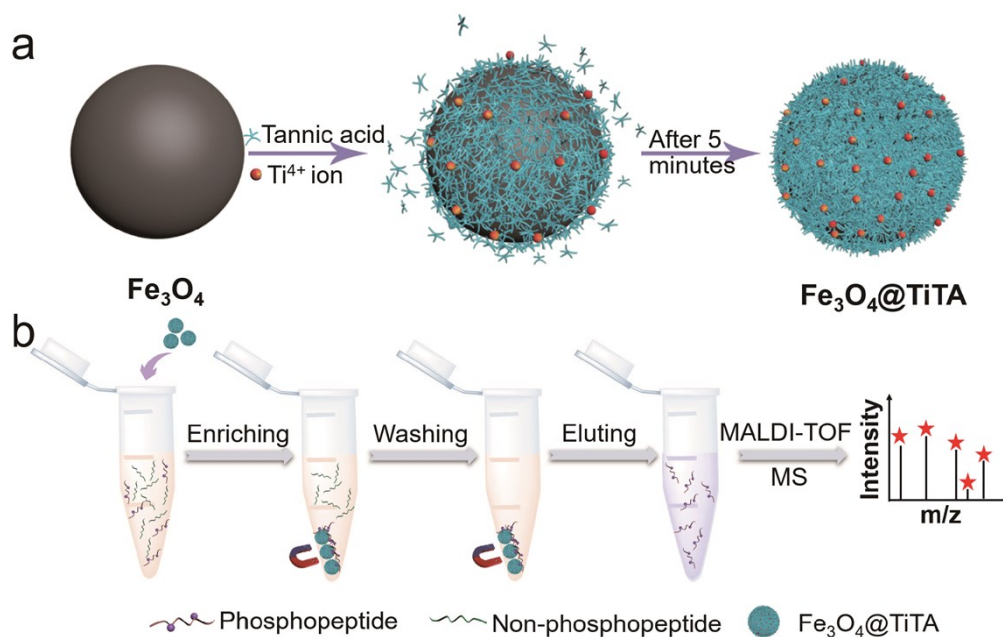

160

161 **Scheme S1** (a) The dynamic synthesis procedure of  $\text{Fe}_3\text{O}_4\text{@TiTA}$  and (b) workflow of  
 162 phosphopeptide enrichment with  $\text{Fe}_3\text{O}_4\text{@TiTA}$  nanoparticles.

163

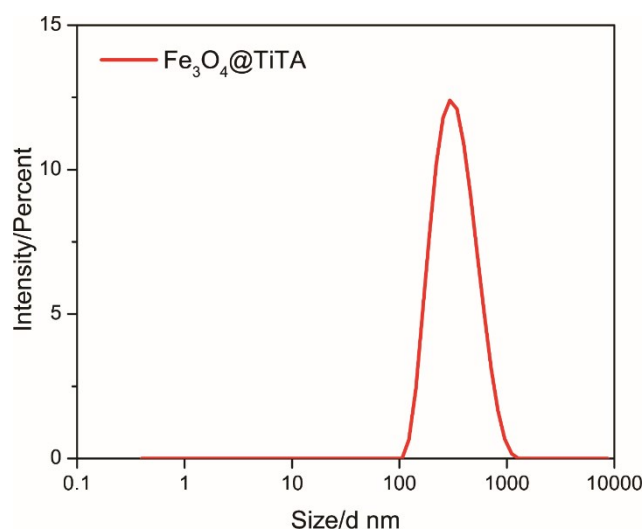

164

165 **Fig. S1** Dynamic Light Scattering of  $\text{Fe}_3\text{O}_4\text{@TiTA}$  nanoparticles.



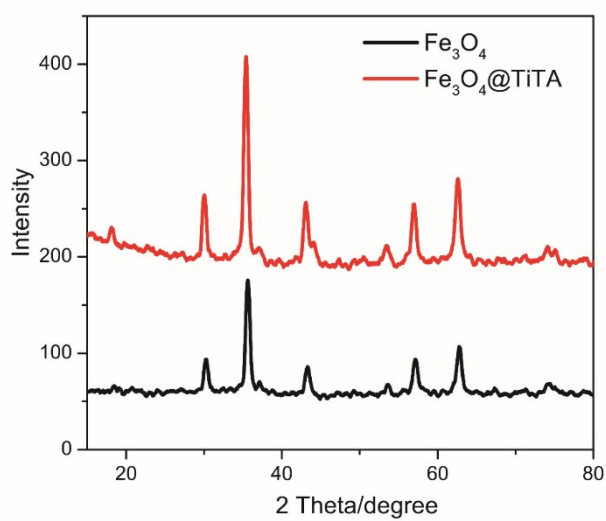

166

167 **Fig. S2** The X-ray diffraction of  $\text{Fe}_3\text{O}_4$  and  $\text{Fe}_3\text{O}_4@\text{TiTA}$  nanoparticles.

168

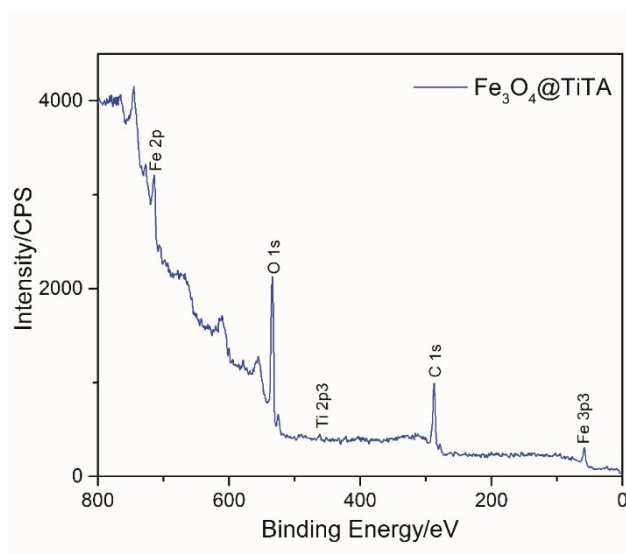

169

170 **Fig. S3** XPS patterns of  $\text{Fe}_3\text{O}_4@\text{TiTA}$  nanoparticles.

171

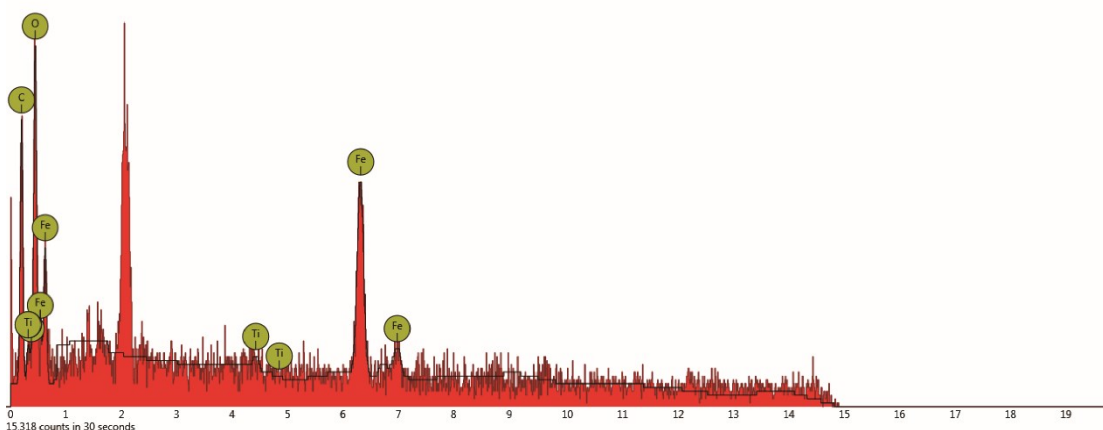

| Element Number | Element Symbol | Element Name | Atomic Conc. | Weight Conc. |
|----------------|----------------|--------------|--------------|--------------|
| 26             | Fe             | Iron         | 12.33        | 36.44        |
| 6              | C              | Carbon       | 53.54        | 34.02        |
| 8              | O              | Oxygen       | 33.75        | 28.57        |
| 22             | Ti             | Titanium     | 0.38         | 0.96         |

**Fig. S4** Energy dispersive X-ray (EDX) spectrum data of  $\text{Fe}_3\text{O}_4@\text{TiTA}$ .

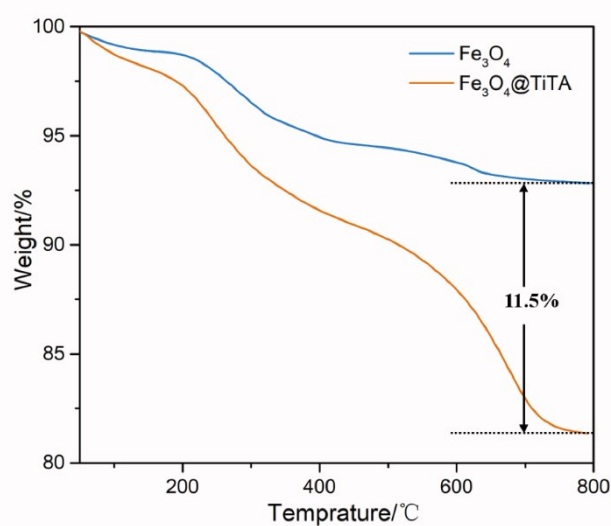

**Fig. S5** The thermogravimetric analysis of  $\text{Fe}_3\text{O}_4$  and  $\text{Fe}_3\text{O}_4@\text{TiTA}$  nanoparticles.

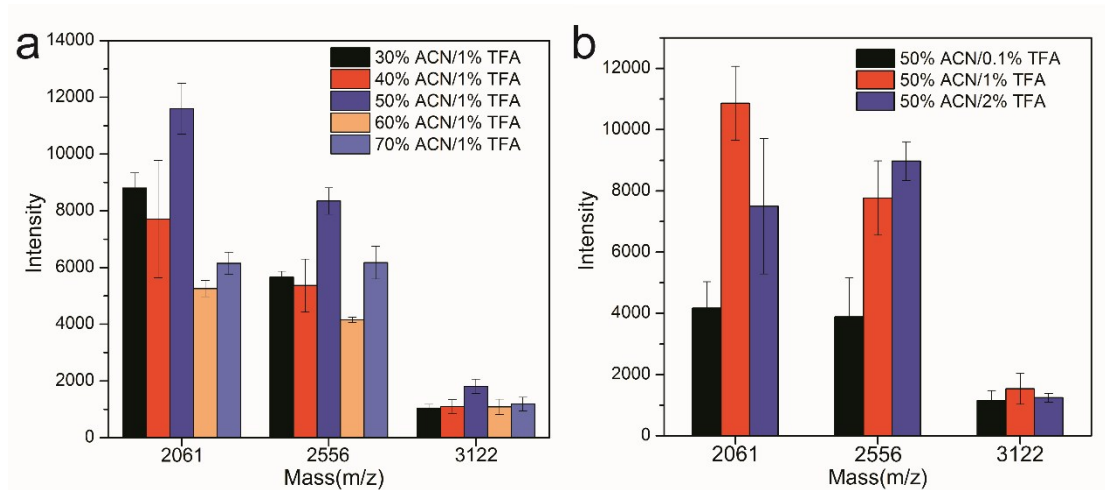

183  
 184 **Fig. S6** Peak intensities of three selected phosphopeptides enriched by Fe<sub>3</sub>O<sub>4</sub>-CA  
 185 nanoparticles in 100 fmol/μL β-casein digestion: a) in different concentration of ACN  
 186 in loading buffer; b) in different concentration of TFA in loading buffer. N=5.

187

188

189

190

191

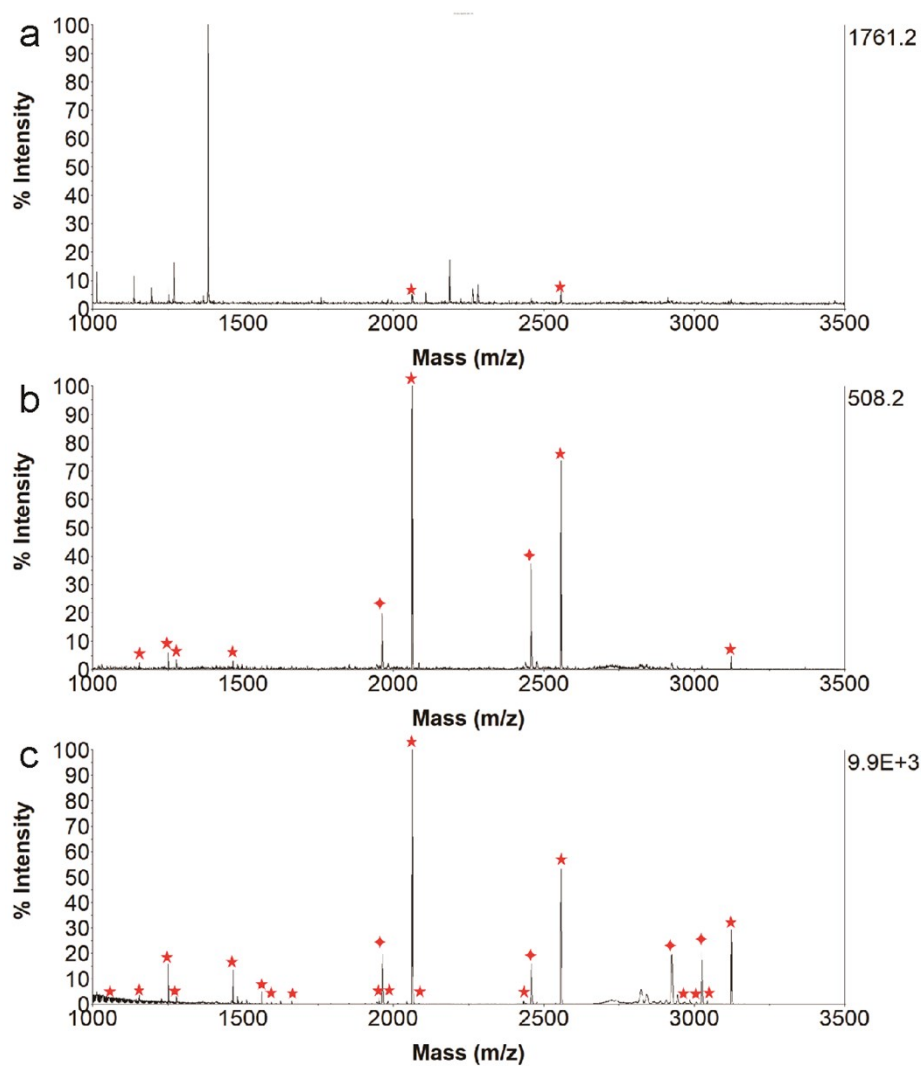

192

193 **Fig. S7** The MALDI-TOF mass spectra of 100 fmol/ $\mu\text{L}$   $\beta$ -casein digestion: before  
 194 treatment (a), after treatment with  $\text{Fe}_3\text{O}_4$  nanoparticles (b) and  $\text{Fe}_3\text{O}_4@\text{TiTA}$   
 195 nanoparticles (c). The identified phosphopeptides and dephosphorylated peptides are  
 196 marked with ★ and ◆, respectively.

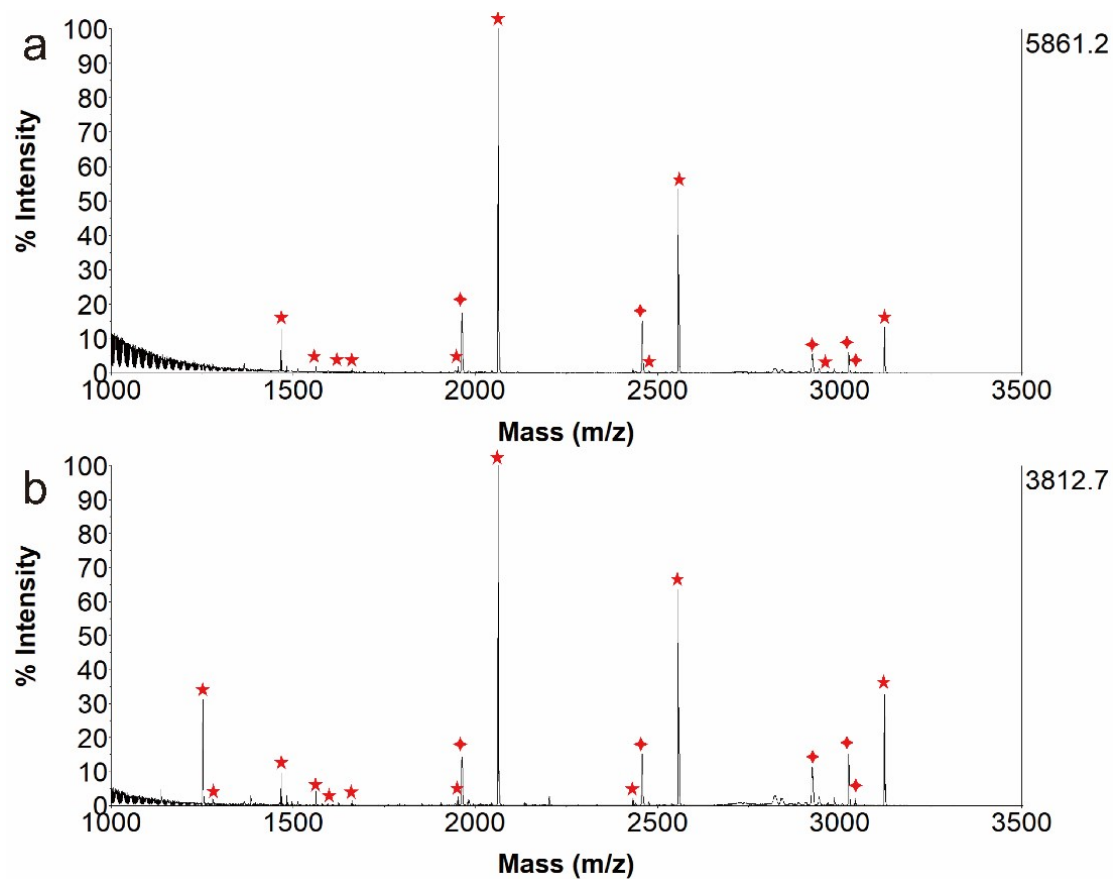

197

198 **Fig. S8** The MALDI-TOF mass spectra of 100 fmol/ $\mu\text{L}$   $\beta$ -casein digestion after  
 199 treatment with  $\text{Fe}_3\text{O}_4@\text{FeTA}$  nanoparticles (b) and  $\text{Fe}_3\text{O}_4@\text{ZrTA}$  nanoparticles. The  
 200 identified phosphopeptides and dephosphorylated peptides are marked with ★  
 201 and ◆ , respectively.

202

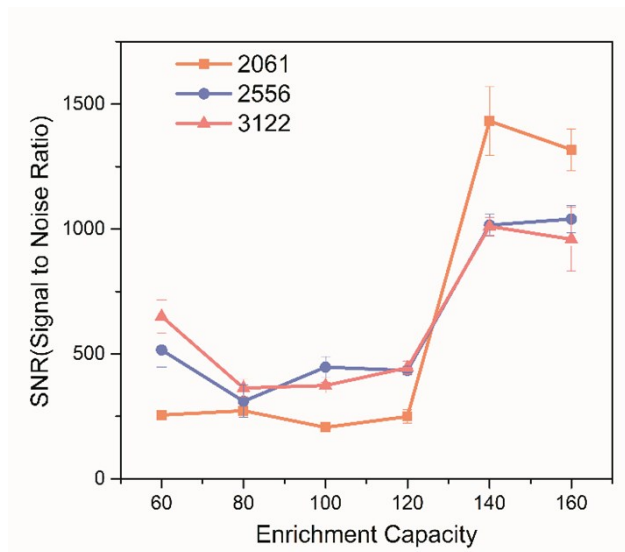

203

204 **Fig. S9** The S/N ratio of phosphopeptides derived from  $\beta$ -casein digestion in the  
 205 supernatant after enrichment by  $\text{Fe}_3\text{O}_4@\text{TiTA}$  nanoparticles. N=5.

206

207

208

209

210

211

212

213

214

215

216

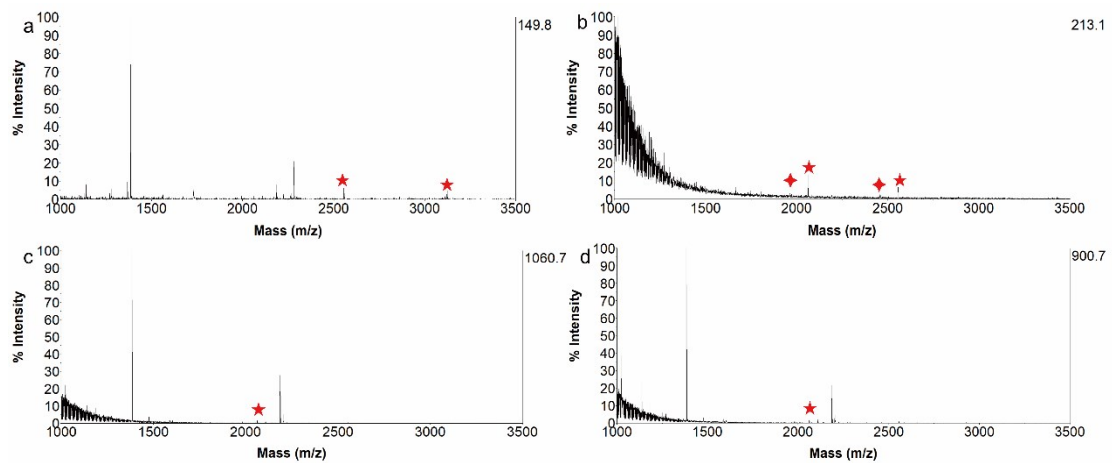

217

218 **Fig. S10** The MALDI-TOF mass spectra of 0.5 fmol/μL β-casein digestion: before  
 219 treatment (a), after treatment with Fe<sub>3</sub>O<sub>4</sub>@TiTA nanoparticles (b), Fe<sub>3</sub>O<sub>4</sub>@ZrTA  
 220 nanoparticles (c) and Fe<sub>3</sub>O<sub>4</sub>@FeTA nanoparticles (d). The identified phosphopeptides  
 221 and dephosphorylated peptides are marked with ★ and ◆, respectively.

222

223

224

225

226

227

228

229

230

231

232

233

234

235

236

237

238

239

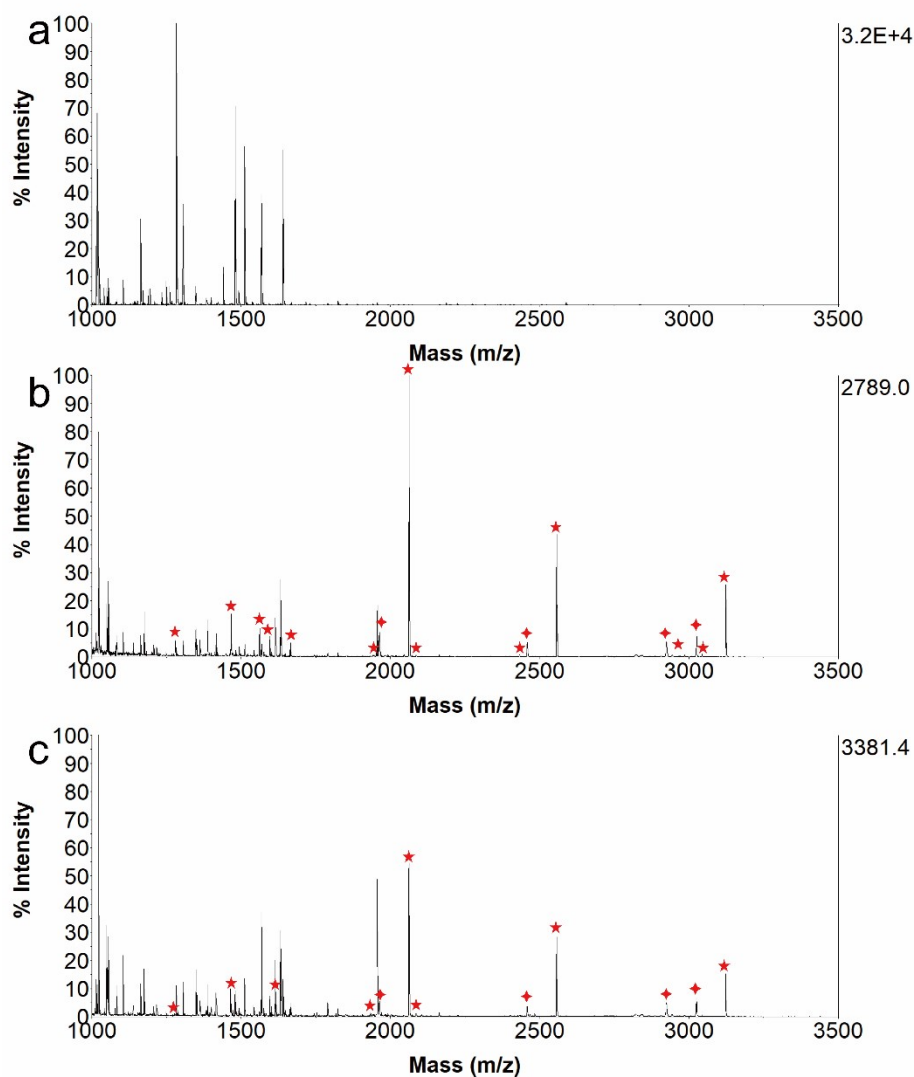

240

241 **Fig. S11** The MALDI-TOF mass spectra of a mixture of BSA and tryptic digestion of  
 242 β-casein: (a) before enrichment and (b) after treatment with  $\text{Fe}_3\text{O}_4@\text{TiTA}$  with the mass  
 243 ratios of BSA:β-casein digestion of 40:1; (c) after treatment with  $\text{Fe}_3\text{O}_4@\text{TiTA}$  with  
 244 the mass ratios of BSA:β-casein digestion of 100:1. The identified phosphopeptides and  
 245 dephosphorylated peptides are marked with ★ and ◆, respectively.

246

247

248

249

250

251

252



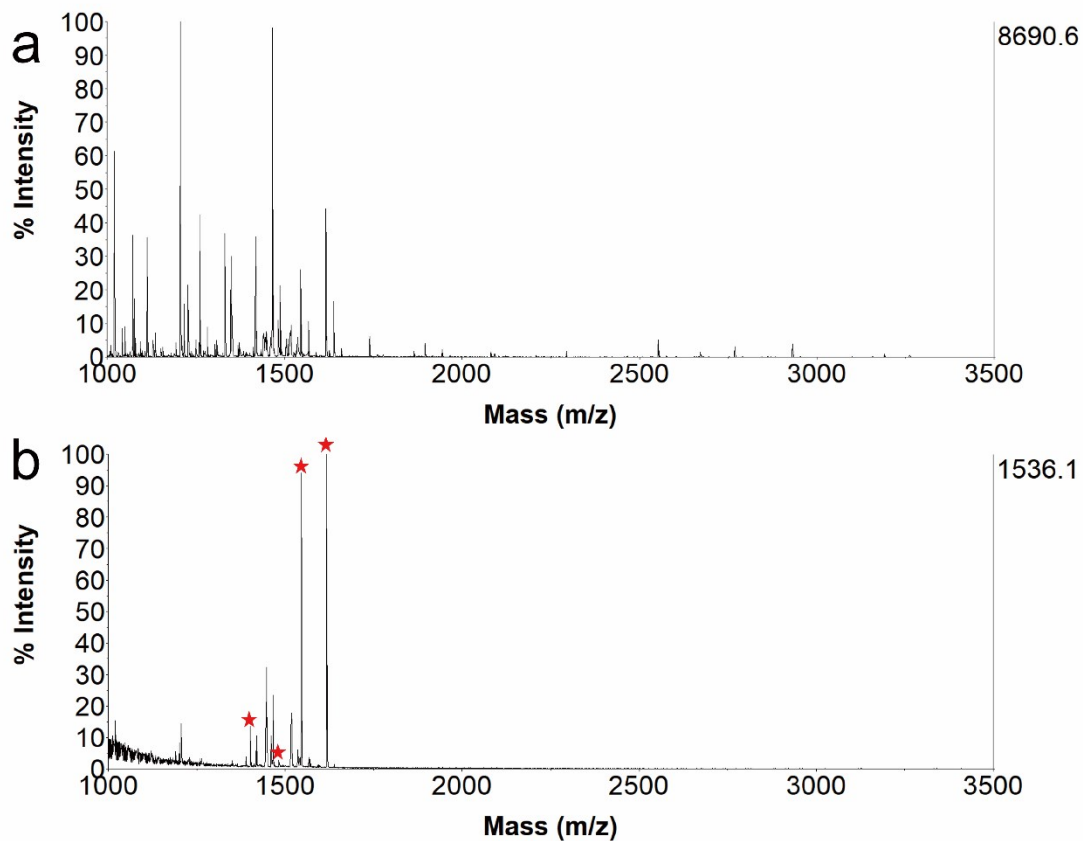

**Fig. S12** The MALDI-TOF mass spectra of human serum: before treatment (a) and the eluent after enrichment with  $\text{Fe}_3\text{O}_4@\text{TiTA}$  (b).

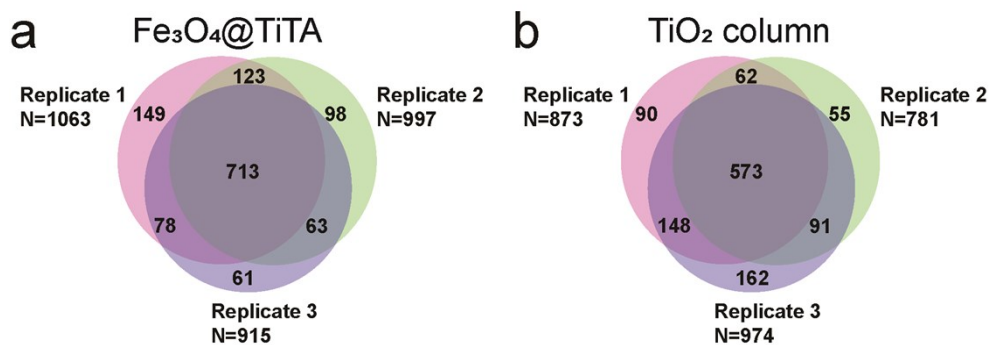

**Fig. S13** Overlap of phosphoproteins captured by  $\text{Fe}_3\text{O}_4@\text{TiTA}$  (a) and  $\text{TiO}_2$  column (b) of three biological replicates.

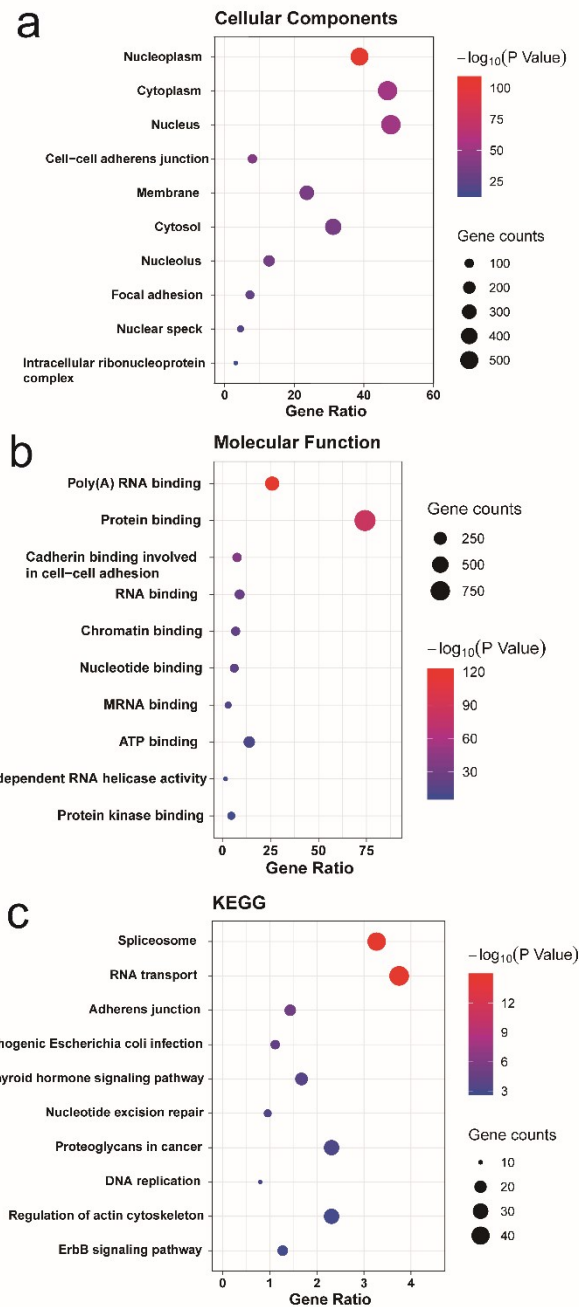

263  
 264 **Fig. S14** The gene ontology (GO) term enrichment analysis of the cellular components  
 265 (a), molecular function (b) and KEGG pathway (c).

272 **Table S1.** Detailed information of the observed phosphopeptides in  $\beta$ -casein digests by  
 273 using  $\text{Fe}_3\text{O}_4@\text{TiTA}$ ,  $\text{Fe}_3\text{O}_4@\text{ZrTA}$  and  $\text{Fe}_3\text{O}_4@\text{FeTA}$ . (S: phosphorylation site)

| No. | Observed<br>m/z | Amino acid sequence                                | $\text{Fe}_3\text{O}_4@$<br>TiTA | $\text{Fe}_3\text{O}_4@$<br>FeTA | $\text{Fe}_3\text{O}_4@$<br>ZrTA | $\text{Fe}_3\text{O}_4$ |
|-----|-----------------|----------------------------------------------------|----------------------------------|----------------------------------|----------------------------------|-------------------------|
| 1   | 1031.0          | FQ <u>S</u> EEQQQTEDELQDK                          | ✓                                |                                  |                                  |                         |
| 2   | 1154.6          | <u>S</u> SEEKFLR                                   | ✓                                |                                  |                                  | ✓                       |
| 3   | 1251.6          | TVD[Mo]J <u>S</u> TEVF                             | ✓                                |                                  | ✓                                | ✓                       |
| 4   | 1279.0          | FQ <u>S</u> EEQQQTEDELQDKIHFP                      | ✓                                |                                  | ✓                                | ✓                       |
| 5   | 1466.6          | TVDME <u>S</u> TEVFTK                              | ✓                                | ✓                                | ✓                                | ✓                       |
| 6   | 1562.1          | EQL <u>S</u> T <u>S</u> EENSKK                     | ✓                                | ✓                                | ✓                                |                         |
| 7   | 1594.7          | TVDME <u>S</u> TEVFTKK                             | ✓                                | ✓                                | ✓                                |                         |
| 8   | 1660.7          | VPQLEIVPN <u>S</u> AEER                            | ✓                                | ✓                                | ✓                                |                         |
| 9   | 1951.9          | YKVPQLEIVPN <u>S</u> AEER                          | ✓                                | ✓                                | ✓                                |                         |
| 10  | 1979.9          | NMAINP <u>S</u> KENLCSTFCK                         | ✓                                |                                  |                                  |                         |
| 11  | 2061.8          | FQ <u>S</u> EEQQQTEDELQDK                          | ✓                                | ✓                                | ✓                                | ✓                       |
| 12  | 2083.8          | KYKVPQLEIVPN <u>S</u> AEER                         | ✓                                |                                  |                                  |                         |
| 13  | 2432.0          | IEKFQ <u>S</u> EEQQQTEDELQDK                       | ✓                                | ✓                                | ✓                                |                         |
| 14  | 2556.1          | FQ <u>S</u> EEQQQTEDELQDKIHFP                      | ✓                                | ✓                                | ✓                                | ✓                       |
| 15  | 2966.3          | ELEELNVPGEIVES <u>L</u> <u>S</u> <u>S</u> SEESITR  | ✓                                | ✓                                |                                  |                         |
| 16  | 3008.2          | NANEEYSIGSSSEESAEEVATEEVK                          | ✓                                |                                  |                                  |                         |
| 17  | 3122.3          | RELEELNVPGEIVES <u>L</u> <u>S</u> <u>S</u> SEESITR | ✓                                | ✓                                | ✓                                | ✓                       |

274

275 **Table S2.** Detailed information of the observed phosphopeptides derived from 10  $\mu\text{L}$   
 276 human serum. (S: phosphorylation site)

| No. | Observed m/z | Phosphorylation site | Amino acid sequence       |
|-----|--------------|----------------------|---------------------------|
| S1  | 1389.4       | 1                    | D <u>S</u> GEGDFLAEGGGV   |
| S2  | 1460.4       | 1                    | AD <u>S</u> GEGDFLAEGGGV  |
| S3  | 1545.5       | 1                    | D <u>S</u> GEGDFLAEGGGVR  |
| S4  | 1616.5       | 1                    | AD <u>S</u> GEGDFLAEGGGVR |

**Table S3.** The comparison table of Fe<sub>3</sub>O<sub>4</sub>@TiTA and other functional materials in identifying phosphopeptides in HeLa cell lysates.

| Material                                                               | Protein amount | Mass spectrometry  | Run   | Identified phosphopeptides/proteins |
|------------------------------------------------------------------------|----------------|--------------------|-------|-------------------------------------|
| Fe <sub>3</sub> O <sub>4</sub> @TiTA                                   | 100μg          | Orbitrap Fusion    | Three | 3456/1285                           |
| PNI-co-ATBA <sub>0.2</sub> @SiO <sub>2</sub> <sup>2</sup>              | 50μg           | LTQ-Orbitrap Velos | -*    | 631/721                             |
| MagG@PEI@PA-Ti <sup>4+</sup> <sup>3</sup>                              | 200μg          | Q-Exactive plus    | Two   | 574/341                             |
| Ti <sup>4+</sup> -IMAC <sup>4</sup>                                    | 250μg          | LTQ-Orbitrap Velos | Two   | ~4700/-                             |
| DMSNs@PDA-Ti <sup>4+</sup> <sup>5</sup>                                | -*             | Q-Exactive         | Three | 2422/-                              |
| TiO <sub>2</sub> /Bi/Fe/Zr <sup>6</sup>                                | -*             | LTQ-Orbitrap Velos | -*    | 434/-*                              |
| Fe <sub>3</sub> O <sub>4</sub> @H-TiO <sub>2</sub> @f-NiO <sup>7</sup> | -*             | Q-Exactive         | -*    | 972/                                |

-\* means not mentioned

280

281

1. N. R. Sun, J. W. Wang, J. Z. Yao, H. M. Chen and C. H. Deng, *Microchim. Acta*, 2019, **186**, 8.
2. Q. Lu, C. Chen, Y. T. Xiong, G. D. Li, X. F. Zhang, Y. H. Zhang, D. D. Wang, Z. C. Zhu, X. L. Li, G. Y. Qing, T. L. Sun and X. M. Liang, *Anal. Chem.*, 2020, **92**, 6269-6277.
3. Y. Y. Hong, H. Zhao, C. L. Pu, Q. L. Zhan, Q. Y. Sheng and M. B. Lan, *Anal. Chem.*, 2018, **90**, 11008-11015.
4. Y. T. Yao, J. Dong, M. M. Dong, F. J. Liu, Y. Wang, J. W. Mao, M. L. Ye and H. F. Zou, *J. Chromatogr. A*, 2017, **1498**, 22-28.
5. Y. Y. Hong, Y. T. Yao, H. L. Zhao, Q. Y. Sheng, M. L. Ye, C. Z. Yu and M. B. Lan, *Anal. Chem.*, 2018, **90**, 7617-7625.
6. B. Zhu, Q. Zhou, D. Zhen, Y. Wang, Q. Cai and P. Chen, *Talanta*, 2019, **194**, 870-875.
7. Y. Hong, C. Pu, H. Zhao, Q. Sheng, Q. Zhan and M. Lan, *Nanoscale*, 2017, **9**, 16764-16772.
